# Supplementary material
Source: PubMed Central journal article supplement (PMC6537792)
Supplement: jamapsychiatry-76-924-s001.pdf [file jamapsychiatry-76-924-s001.pdf]

## Supplementary Online Content

Meier SM, Tronetti K, Purves KL, et al. Genetic variants associated with anxiety and stress-related disorders: a genome-wide association study and mouse-model study. *JAMA Psychiatry*. Published online May 22, 2019. doi:10.1001/jamapsychiatry.2019.1119

### **eMethods**

### **eReferences**

**eFigure 1.** Q-Q plot of GWAS analysis

**eFigure 2.** Regional association plots for index SNPs in PDE4B

**eFigure 3.** Forest plots for the genome-wide significant index SNP in PDE4B

**eFigure 4.** Manhattan plot of the results from the GWAS of anxiety disorders

**eFigure 5.** Manhattan plot of the results from the GWAS of stress-related disorders

**eFigure 6.** Manhattan plot of the results from the GWAS excluding adjustment disorders

**eFigure 7.** Manhattan plot of the results from the GWAS for “population” Design

**eFigure 8.** Manhattan plot of the results from the GWAS for the “covariate” Design

**eFigure 9.** Manhattan plot of the results from the GWAS for “propensity” Design

**eFigure 10.** Manhattan plot of the results from the GWAS excluding schizophrenia

**eFigure 11.** Manhattan plot of the results from the GWAS including OCD

**eFigure 12.** Partitioning of heritability by functional annotations

**eFigure 13.** Partitioning of heritability by tissue-group annotations

**eFigure 14.** Partitioning of heritability by tissue-specific H3K4Me1 annotations

**eFigure 15.** Multivariate regression of normalized polygenic risk scores on diagnostic subtypes

**eFigure 16.** Multivariate regression of normalized polygenic risk scores on comorbid subgroups

**eTable 1.** Summary of results for PDE4B

**eTable 2.** Gene-based test results

**eTable 3.** Pathway analysis results

**eTable 4.** Genetic correlations for “naïve” Design

**eTable 5.** Genetic correlations for “naïve” Design (UKBB traits)

**eTable 6.** Genetic correlations for “prevalence” Design

**eTable 7.** Genetic correlations for “prevalence” Design (UKBB traits)

**eTable 8.** Genetic correlations for “covariate” Design

**eTable 9.** Genetic correlations for “covariate” Design (UKBB traits)

**eTable 10.** Genetic correlations for “propensity” Design

**eTable 11.** Genetic correlations for “propensity” Design (UKBB traits)

**eTable 12.** SNP Heritability estimates across varying analytical designs

This supplementary material has been provided by the authors to give readers additional information about their work.

## eMethods

### Quality control, GWAS and gene-based analysis

Quality control, imputation and primary association analyses were done using the bioinformatics pipeline Ricopili (available at <https://github.com/Nealelab/ricopili>), developed by the Psychiatric Genomics Consortium (PGC)<sup>1</sup>. In order to avoid potential study effects of the 23 genotyping batches within the iPSYCH cohort, each batch was processed separately. Standard procedures for stringent quality control included filters for call rate, Hardy-Weinberg equilibrium, and heterozygosity rates. Each cohort was then phased and imputed using the 1000 Genomes Project phase 3 imputation reference panel<sup>2</sup> using SHAPEIT<sup>3</sup> and IMPUTE2<sup>4</sup>, respectively. Cryptic relatedness and population structure was assessed on high-quality single nucleotide polymorphisms (SNPs) with low linkage disequilibrium (LD) passing filters. Genetic relatedness was estimated in order to identify first and second-degree relatives and one individual was excluded from each related pair. Genetic outliers were identified for exclusion based on principal component analyses using EIGENSOFT<sup>5, 6</sup>, contemporarily making use of register-based information on parents' and grandparents' country of origin. The primary analysis in this study is the GWAS, which analyses each SNP for association with phenotype.

GWASs for the 23 genotyping batches in iPSYCH were performed using logistic regression model with the imputed marker dosages (the expected count of one of the alleles) including the first four principal components in order to control for remaining population stratification<sup>5</sup>. Subsequently the results were meta-analysed using an inverse-variance weighted fixed effects model, implemented in METAL (version 2011-03-25)<sup>7</sup>. The international standard for statistical significance is a P-value of  $5.0 \times 10^{-8}$ , which corrects for the approximately one million independent statistical tests conducted. Variants were filtered and included for imputation quality (INFO score)  $> 0.8$  and MAF  $> 0.01$ . After filtering, the meta-analysis included results for 8933939 markers. To explore effects of phenotype definitions on genetic association results, we repeated the analyses separating anxiety disorders and stress-related disorders; and excluding unspecific and other subtypes of these disorders. We then performed 1000 analyses in samples for which we randomly removed the same number of individuals (that had specific subtype) from the case group. The p-value for rs7528604 was assessed as  $r/n$  with  $r$  being the number of samples with a P-value more or equally significant compared to our analysis removing different subtypes and  $n$  being the number of resamples (1000).

Gene-based associations were calculated with MAGMA<sup>8</sup> using the summary statistics from the main GWAS analyses. Association was tested using the SNP-wise mean model, in which the sum of  $-\log(\text{SNP P-value})$  for SNPs located within the transcribed region was used as test statistic. MAGMA<sup>8</sup> controls for gene-size, number of SNPs in a gene and LD between markers; LD correction was based on LD estimates from the 1000 Genomes Project phase 3. The gene-based associations were used to analyze sets of genes to test for enrichment of association signals in genes belonging to specific biological pathways or processes (as per MAGMA procedures). We used the MSigDB Canonical Pathways as this list covers a wide variety of gene sets, drawn from different gene-set databases, thus providing results that are not overly dependent on the choice of a narrow set of gene sets. The statistical significance for a gene was defined as a P-value  $2.60 \times 10^{-6}$  ( $0.05/19222$  genes tested), for a pathway  $2.93 \times 10^{-6}$  ( $0.05/17081$  pathways tested).

### Adjusting for mental comorbidity

As the majority of cases in the iPSYCH cohort with anxiety and stress-related disorders by design have another mental disorder (Table 1), we aimed to adjust for mental comorbidity. Models that correct for mental comorbidity therefore supplemented our analyses. In a first model cases with anxiety and stress-related disorders were randomly selected from both iPSYCH cases and controls (N=12665) matching the comorbidity patterns observed in population-based samples (60% mood disorders, 20% ADHD, 5% SCZ, and 5% anorexia<sup>9-13</sup>, resulting in 10311 cases. This approach follows the idea of a "weighted design" where differences in population size and sampling fraction between the different strata used in the design are considered. A second model included all genotyped individuals of the iPSYCH study (N cases=12096; N controls=42215) and design phenotypes were employed as covariates (schizophrenia, ADHD, anorexia

nervosa, and affective disorders)<sup>14</sup>. In our most stringent sensitivity analyses we further employed a propensity-score-matched design, matching cases and controls on mental comorbidity status, principal components, genotyping batches, and age using the R 3.1.0 package ‘MatchIt’ (using the ‘nearest neighbor’ algorithm). After matching a total of 11599 individuals with a comorbid anxiety or stress-related disorder and 11599 without comorbid disorders remained for analysis using a Cochran-Mantel-Haenszel test. Inherent to the design this analysis was least powered to find genetic variants for anxiety and stress-related disorders across all genome-wide designs used in our study. All these sensitivity analyses resulted in a reduction of the number of cases, albeit with varying impact on power. We also performed a second set of sensitivity analyses targeted at identifying a significant impact of comorbid depression or schizophrenia cases on our association results for *PDE4B*. For these analyses, we first performed a standard association test for rs7528604 (see above) but removing individuals with comorbid depression or schizophrenia from the case group (see eFigure 10). We then performed 1000 analyses in samples for which we randomly removed the same number of individuals (that had comorbid depression or schizophrenia) from the case group. The p-value for rs7528604 was assessed as  $r/n$  with  $r$  being the number of samples with a P-value more or equally significant compared to our analysis removing the comorbid depression or schizophrenia cases and  $n$  being the number of resamples (1000). Finally, analyses were supplemented by including obsessive-compulsive disorders (OCD) among the anxiety and stress-related disorders.

### SNP heritability and genetic correlation with other traits

LD score regression was used to dissect the relative contribution of polygenic effects and confounding factors, such as cryptic relatedness, sample overlap and population stratification, to deviation from the null in the genome-wide distribution of GWAS  $\chi^2$  statistics. Analysis was performed using pre-computed LD scores based on 378 European-ancestry individuals from the 1000 Genomes Project phase 3 (available on <https://github.com/bulik/ldsc>) and summary statistics for the European-ancestry GWAS to ensure matching of population LD structure. The influence of confounding factors was tested by comparing the estimated intercept of the LD score regression to the expected value under the null hypothesis of no confounding from e.g. population stratification. We also calculated the heritability on the liability scale in our main GWASs. Prevalence was specified as 20% for the combination of anxiety and stress-related disorders<sup>15, 16</sup>, 12% for anxiety disorders alone and 15% for stress-related disorder alone. Using LD score regression SNP heritability was partitioned by functional category and tissue association<sup>17, 18</sup>. Partitioning was performed for 53 overlapping functional categories, as well as 220 cell-type-specific annotations grouped into 10 cell-type categories<sup>19</sup>. Enrichment in the heritability of a functional category was defined as the proportion of SNP heritability explained divided by the proportion of SNPs<sup>19</sup>. Test for enrichment in the heritability of SNPs located in cell-type-specific regulatory elements was evaluated in two ways. One by using the 220 cell-type-specific annotations that have been grouped into 10 cell-type groups as previously described<sup>19</sup>. These annotations are based on cell-specific histone markers, related to H3K4me1<sup>20</sup>, H3K4me3<sup>20</sup>, H3K9ac<sup>20</sup> and H3K27ac<sup>21</sup>. In these analyses, we tested if the cell-group specific annotations contributed significantly to the SNP heritability when controlling for the annotations in the full baseline model. Further, we expanded the cell-type specific heritability analysis by including an annotation based on information about H3K4Me1 imputed gapped peaks excluding the broad MHC-region (chr6: 25-35MB), generated by the Roadmap Epigenomics Mapping Consortium<sup>21, 22</sup>. This mark has previously been used with success in identifying significant enrichments in tissues/cells and often in a biologically plausible manner<sup>21</sup>.

Genetic correlations ( $r_g$ ) correlations were tested for 228 phenotypes with publicly available GWAS summary statistics using LD Hub<sup>23</sup>. For these analyses, statistical significance was set using the Bonferroni correction, which is conservative given non-independence of the traits. A P-value of  $2.19 \times 10^{-4}$  ( $0.05/228$  traits tested) was considered significant. For a given pair of traits, LD score regression estimates the expected population correlation between the best possible linear SNP-based predictor for each trait, restricting to common SNPs. Such correlation of genetic risk may reflect a combination of co-localization, pleiotropy, shared biological mechanisms, and causal relationships between traits. Please see eTables 4 (naïve design), 6 (prevalence design), 8 (covariates design), 10 (propensity design). for a full list of results.

Genetic correlations ( $r_G$ ) were also tested for 596 traits from the UK Biobank study (UKBB), made publicly available at <https://sites.google.com/broadinstitute.org/ukbbgwasresults>. Details on how the GWASs in UKBB have been conducted are available here: <http://www.nealelab.is/blog/2017/9/11/details-and-considerations-of-the-uk-biobank-gwas>. We restricted our analyses to those traits that showed z-scores  $> 2$  in their heritability analyses. We would like to note that (as mentioned on the blog referenced above) the

UKBB GWAS results are still preliminary in their nature and we therefore would like to advise readers to take the results of our analyses with a grain of salt. Nonetheless, we still believe that they allow for some interesting insights and together with the results from LD Hub and our other analyses can shed more light on the impact of comorbid traits and phenotypes on anxiety and stress related disorders. A P-value of  $8.39 \times 10^{-5}$  ( $0.05/596$  traits tested) was considered significant. For all traits that show a significant correlation after Bonferroni correction for multiple testing results can be found in eTables 5 (naïve design), 7 (prevalence design), 9 (covariates design), 11 (propensity design).

### **Polygenic risk score**

Polygenic risk score (PRS)<sup>24</sup> were constructed in our sample in order to explore polygenic heterogeneity across diagnostic subtypes and comorbidities. PRS were calculated by multiplying the natural log of the odds ratio of each variant by the allele-dosage (imputation probability) and whole-genome PRS were obtained by summing values over variants for each individual<sup>24</sup>. After scoring, PRS were normalized and used as continuous markers. We regressed the normalized scores on anxiety and stress-related subgroups while including covariates for batches and principal components in a multivariate regression<sup>25</sup>. We focused on unique phenotypes showing strong genetic correlation ( $P < 5.0 \times 10^{-7}$ ) with anxiety and stress-related disorders in our LD Hub analyses (schizophrenia<sup>1</sup>, depression<sup>26</sup>, subjective well-being<sup>27</sup>, and neuroticism<sup>27</sup>), excluding the iPSYCH samples from the schizophrenia and depression dataset.

### **Mouse model of chronic psychosocial stress**

To establish the effect of chronic psychosocial stress on the brain gene expression levels of Pde4b, we employed the chronic social defeat stress (CSDS) model<sup>28</sup>. We obtained 5-week old male mice from two inbred strains: C57/BL6NCrI (B6, innately non-anxious strain) and DBA/2NCrI (D2, innately anxious strain; Charles River, Sulzfeld, Germany) and let them acclimatize for one week. Mice were exposed to a resident aggressor mouse (Clr-CD1 strain) for max. 10 min followed by housing in adjacent compartments for 24 h, repeated once per day for 10 days with a novel resident aggressor. Control mice were housed adjacent to another mouse, switching cage-mates daily but without physical exposure<sup>28</sup>.

Twenty-four hours after the last CSDS session we tested all mice for social aversion using two trials. For the first trial the mice were placed for 150 s into an arena containing a perforated Plexiglass cylinder. For the second trial the empty cylinder was replaced by one containing a novel Clr-CD1 mouse. The ratio of time the mouse spent in the area around the cylinder in the trial containing the mouse compared to the trial without a social target was used to determine whether each defeated mouse was resilient or susceptible to CSDS. We defined a susceptible mouse as one which showed a marked reduction in this ratio compared to the same-strain control mice collected from several cohorts (1 standard deviation below the control mean). The remaining mice with scores above this threshold were classified as resilient as their behavior remained similar to the same-strain controls. After this test the mice were housed in single-cages.

One week after the end of CSDS we dissected the medial prefrontal cortex (mPFC) and ventral hippocampus (vHPC) for RNA sequencing (RNA-Seq). All animal procedures were approved by the Regional State Administration Agency for Southern Finland (license numbers ESAVI-3801-041003-2011 and ESAVI/2766/04.10.07/2014) and carried according to directive 2010/63/EU of the European Parliament and of the Council, and the Finnish Act on the Protection of Animals Used for Science or Educational Purposes (497/2013). For more details on these experiments see Laine et al.<sup>29</sup>.

### **Gene expression profiling**

Total RNA was extracted using TriReagent. For RNA-seq we carried out rRNA depletion using Ribo-Zero (Illumina, San Diego, CA, USA) followed by fragmentation with an S2 ultrasonicator (Covaris Inc., Woburn, MA, USA). mRNA sequencing libraries were prepared with Nextera (Illumina, vHPC samples) or ScriptSeq v2 (Epicentre, Madison, WI, USA, mPFC samples) kits. The vHPC samples were sequenced by the Finnish Institute of Molecular Medicine (FIMM) and the mPFC samples by the Institute of Biotechnology at the University of Helsinki, using Illumina High-Seq 2000 and NextSeq 500, respectively.

Following quality control, we aligned the mRNA reads with STAR 2.5.0c<sup>30</sup> to the mouse genome GRCm38. Data normalization and differential expression analysis were carried out with ComBat<sup>31</sup> and limma v3.32.5<sup>32</sup>.

Whole transcriptome level multiple testing correction was done with the Benjamini-Hochberg method<sup>33</sup>, after which the expression levels of *Pde4b* was extracted from the dataset.

## eReferences

1. Schizophrenia Working Group of the Psychiatric Genomics Consortium . Biological insights from 108 schizophrenia-associated genetic loci. *Nature*. 2014;511(7510): 421-427.
2. Genomes Project Consortium, Abecasis GR, Altshuler D, et al. A map of human genome variation from population-scale sequencing. *Nature*. 2010;467(7319): 1061-1073.
3. Delaneau O, Marchini J, Zagury JF. A linear complexity phasing method for thousands of genomes. *Nat Methods*. 2011;9(2): 179-181.
4. Howie BN, Donnelly P, Marchini J. A flexible and accurate genotype imputation method for the next generation of genome-wide association studies. *PLoS Genet*. 2009;5(6): e1000529.
5. Price AL, Patterson NJ, Plenge RM, Weinblatt ME, Shadick NA, Reich D. Principal components analysis corrects for stratification in genome-wide association studies. *Nat Genet*. 2006;38(8): 904-909.
6. Cornelis MC, Nugent NR, Amstadter AB, Koenen KC. Genetics of post-traumatic stress disorder: review and recommendations for genome-wide association studies. *Curr Psychiatry Rep*. 2010;12(4): 313-326.
7. Willer CJ, Li Y, Abecasis GR. METAL: fast and efficient meta-analysis of genomewide association scans. *Bioinformatics*. 2010;26(17): 2190-2191.
8. de Leeuw CA, Mooij JM, Heskes T, Posthuma D. MAGMA: generalized gene-set analysis of GWAS data. *PLoS Comput Biol*. 2015;11(4): e1004219.
9. Kessler RC, Sonnega A, Bromet E, Hughes M, Nelson CB. Posttraumatic stress disorder in the National Comorbidity Survey. *Arch Gen Psychiatry*. 1995;52(12): 1048-1060.
10. Ruscio AM, Hallion LS, Lim CCW, et al. Cross-sectional Comparison of the Epidemiology of DSM-5 Generalized Anxiety Disorder Across the Globe. *JAMA Psychiatry*. 2017;74(5): 465-475.
11. Stein DJ, Lim CCW, Roest AM, et al. The cross-national epidemiology of social anxiety disorder: Data from the World Mental Health Survey Initiative. *BMC Med*. 2017;15(1): 143.
12. Okkels N, Trabjerg B, Arendt M, Pedersen CB. Traumatic Stress Disorders and Risk of Subsequent Schizophrenia Spectrum Disorder or Bipolar Disorder: A Nationwide Cohort Study. *Schizophr Bull*. 2017;43(1): 180-186.
13. Keski-Rahkonen A, Mustelin L. Epidemiology of eating disorders in Europe: prevalence, incidence, comorbidity, course, consequences, and risk factors. *Curr Opin Psychiatry*. 2016;29(6): 340-345.
14. Demontis D, Rajagopal VM, Als TD, et al. Genome-wide association study implicates CHRNA2 in cannabis use disorder. *bioRxiv* doi: 10.1101/237321.
15. Pedersen CB, Mors O, Bertelsen A, et al. A comprehensive nationwide study of the incidence rate and lifetime risk for treated mental disorders. *JAMA Psychiatry*. 2014;71(5): 573-581.
16. Kessler RC, Berglund P, Demler O, Jin R, Merikangas KR, Walters EE. Lifetime prevalence and age-of-onset distributions of DSM-IV disorders in the National Comorbidity Survey Replication. *Arch Gen Psychiatry*. 2005;62(6): 593-602.
17. Bulik-Sullivan BK, Loh PR, Finucane HK, et al. LD Score regression distinguishes confounding from polygenicity in genome-wide association studies. *Nat Genet*. 2015;47(3): 291-295.
18. Bulik-Sullivan B, Finucane HK, Anttila V, et al. An atlas of genetic correlations across human diseases and traits. *Nat Genet*. 2015;47(11): 1236-1241.
19. Finucane HK, Bulik-Sullivan B, Gusev A, et al. Partitioning heritability by functional annotation using genome-wide association summary statistics. *Nat Genet*. 2015;47(11): 1228-1235.
20. Trynka G, Sandor C, Han B, et al. Chromatin marks identify critical cell types for fine mapping complex trait variants. *Nat Genet*. 2013;45(2): 124-130.
21. Roadmap Epigenomics C, Kundaje A, Meuleman W, et al. Integrative analysis of 111 reference human epigenomes. *Nature*. 2015;518(7539): 317-330.
22. Ernst J, Kellis M. Large-scale imputation of epigenomic datasets for systematic annotation of diverse human tissues. *Nat Biotechnol*. 2015;33(4): 364-376.
23. Zheng J, Erzurumluoglu AM, Elsworth BL, et al. LD Hub: a centralized database and web interface to perform LD score regression that maximizes the potential of summary level GWAS data for SNP heritability and genetic correlation analysis. *Bioinformatics*. 2017;33(2): 272-279.

24. International Schizophrenia C, Purcell SM, Wray NR, et al. Common polygenic variation contributes to risk of schizophrenia and bipolar disorder. *Nature*. 2009;460(7256): 748-752.
25. Grove J, Ripke S, Als TD, et al. Common Risk Variants Identified in Autism Spectrum Disorder. *bioRxiv* doi: 10.1101/224774.
26. Wray NR, Ripke S, Mattheisen M, et al. Genome-wide association analyses identify 44 risk variants and refine the genetic architecture of major depression. *Nat Genet*. 2018;50(5): 668-681.
27. Okbay A, Baselmans BM, De Neve JE, et al. Genetic variants associated with subjective well-being, depressive symptoms, and neuroticism identified through genome-wide analyses. *Nat Genet*. 2016;48(6): 624-633.
28. Golden SA, Covington HE, 3rd, Berton O, Russo SJ. A standardized protocol for repeated social defeat stress in mice. *Nat Protoc*. 2011;6(8): 1183-1191.
29. Laine MA, Trontti K, Misiewicz Z, et al. Genetic Control of Myelin Plasticity after Chronic Psychosocial Stress. *eNeuro*. 2018;5(4).
30. Dobin A, Davis CA, Schlesinger F, et al. STAR: ultrafast universal RNA-seq aligner. *Bioinformatics*. 2013;29(1): 15-21.
31. Johnson WE, Li C, Rabinovic A. Adjusting batch effects in microarray expression data using empirical Bayes methods. *Biostatistics*. 2007;8(1): 118-127.
32. Ritchie ME, Phipson B, Wu D, et al. limma powers differential expression analyses for RNA-sequencing and microarray studies. *Nucleic Acids Res*. 2015;43(7): e47.
33. Benjamini Y, Hochberg Y. Controlling the false discovery rate: a practical and powerful approach to multiple testing. *J R Stat Soc Series B Stat Methodol*. 1995;57: 89–300.

**eFigure 1.** Q-Q plot of GWAS analysis

Lambda is the genomic inflation factor for the sample under study. Lambda1000 is an assumed genomic inflation factor for a target sample size of 1000 cases and 1000 controls given the actual lambda observed in the study. The latter is sometimes used to compare studies of different sample sizes.

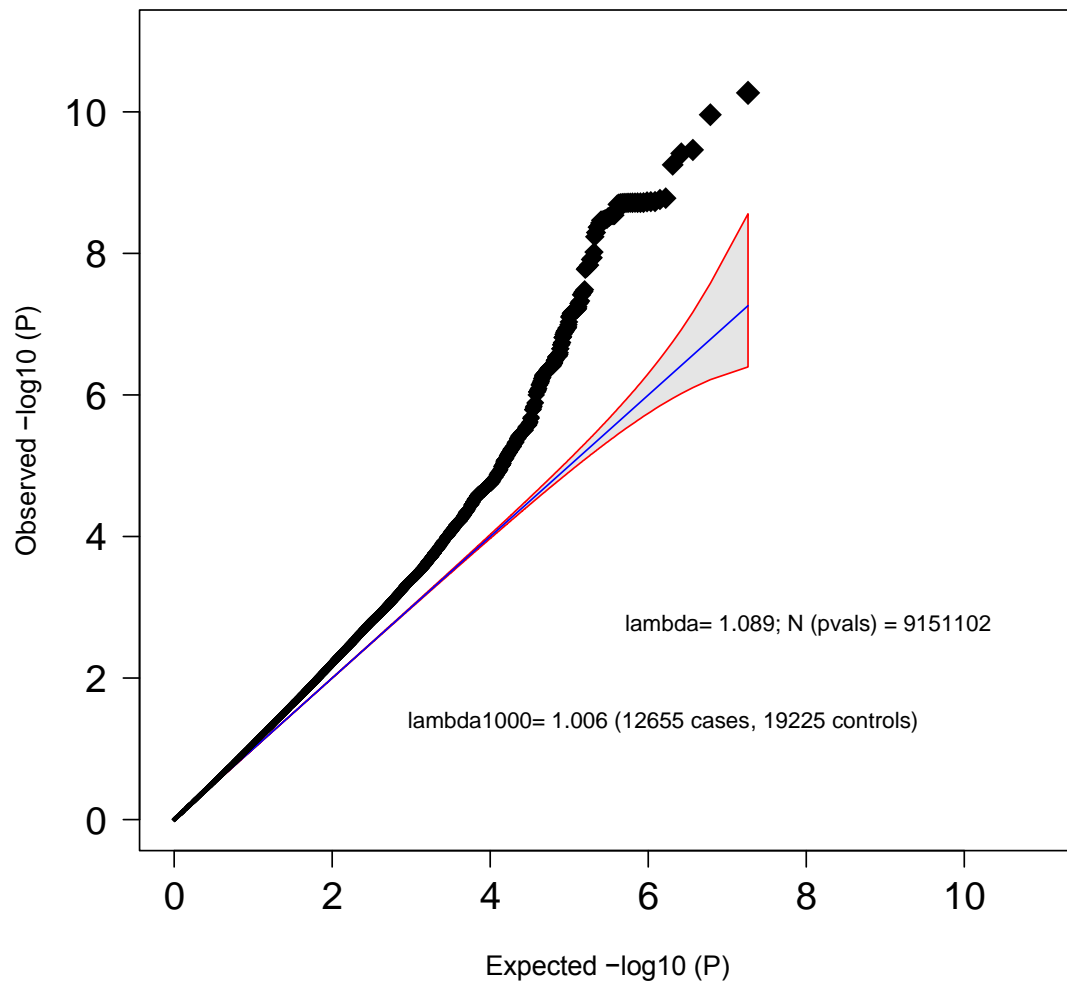



## eFigure 2. Regional association plots for index SNPs in PDE4B

Regional association plot of the local association results. The plot includes information about the significant locus, the location and orientation of the genes in the region, LD estimates of surrounding SNPs with the index SNP is indicated by colour (colour bar in upper left corner indicates  $r^2$  values), if multiple index SNPs then different colour scheme for each index SNP. Additionally, the local estimates of recombination rate. Detailed SNP info in upper right corner (blue letters): SNP, P, OR, MAF, imputation INFO score, directions in the analysed samples/waves (left - right - missing).

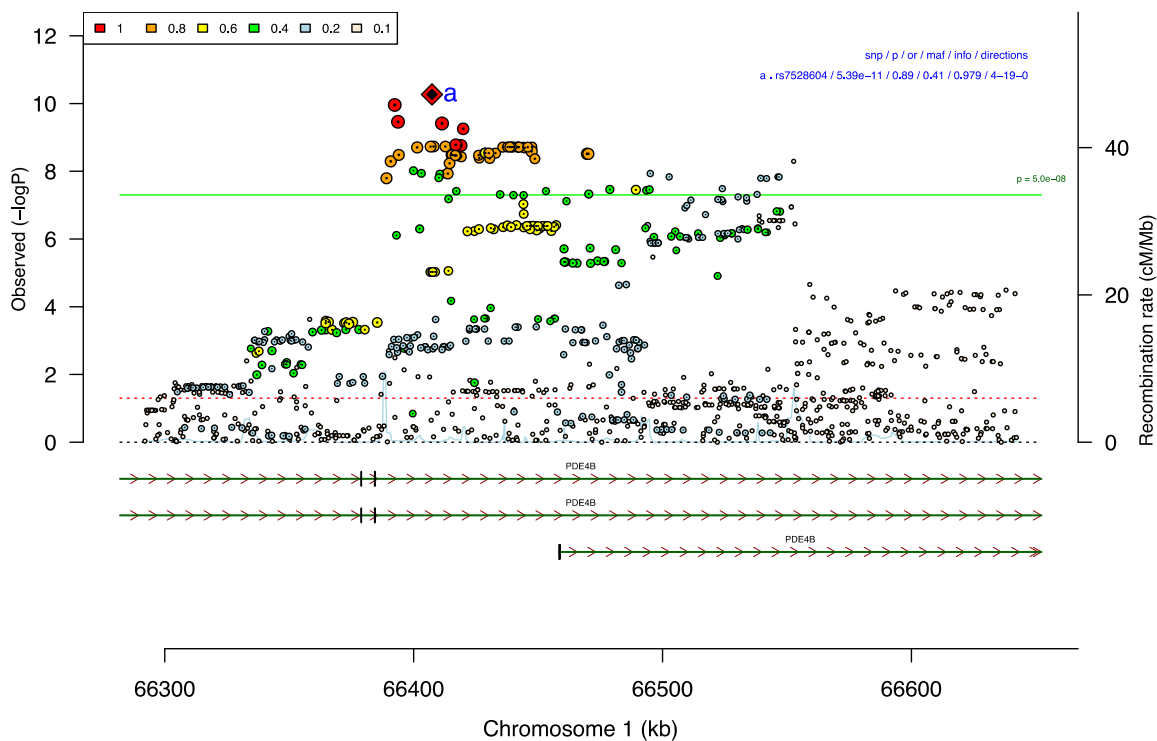

**eFigure 3.** Forest plots for the genome-wide significant index SNP in PDE4B

The plot provides a visualization of the effect size estimates for each wave in our sample, in addition the 95% confidence intervals are included for the estimates.

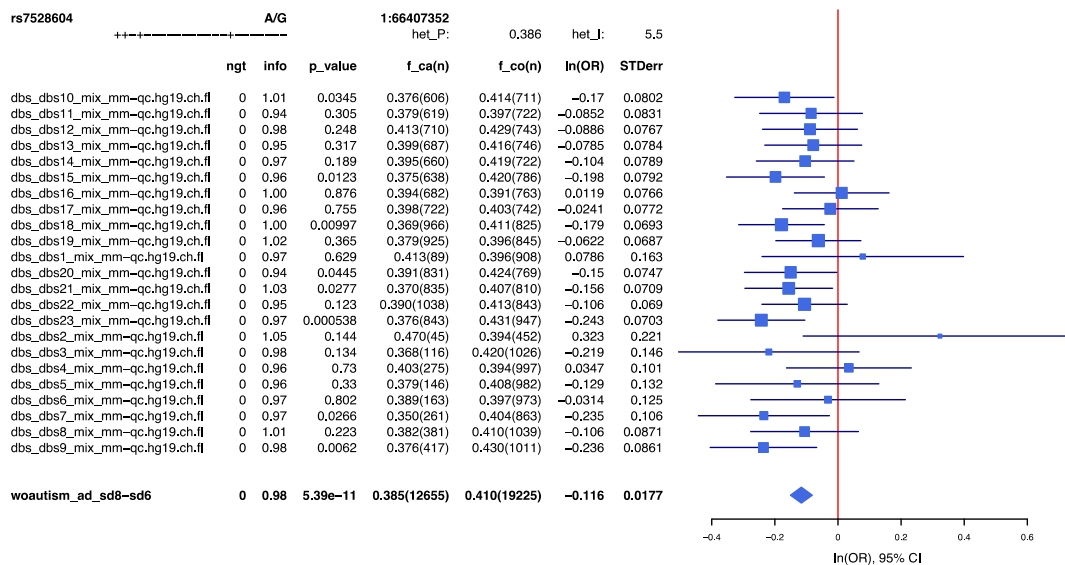

**eFigure 4.** Manhattan plot of the results from the GWAS of anxiety disorders

ICD-10; (F40.0-F41.9); 4584 cases and 19225 controls. The index variants in the most significant loci are highlighted as a diamond. Index variants located with a distance less than 400kb are considered as one locus. The full summary statistics of the data presented in this figure can be downloaded at our website. Please see the data availability section in the main manuscript for more details.

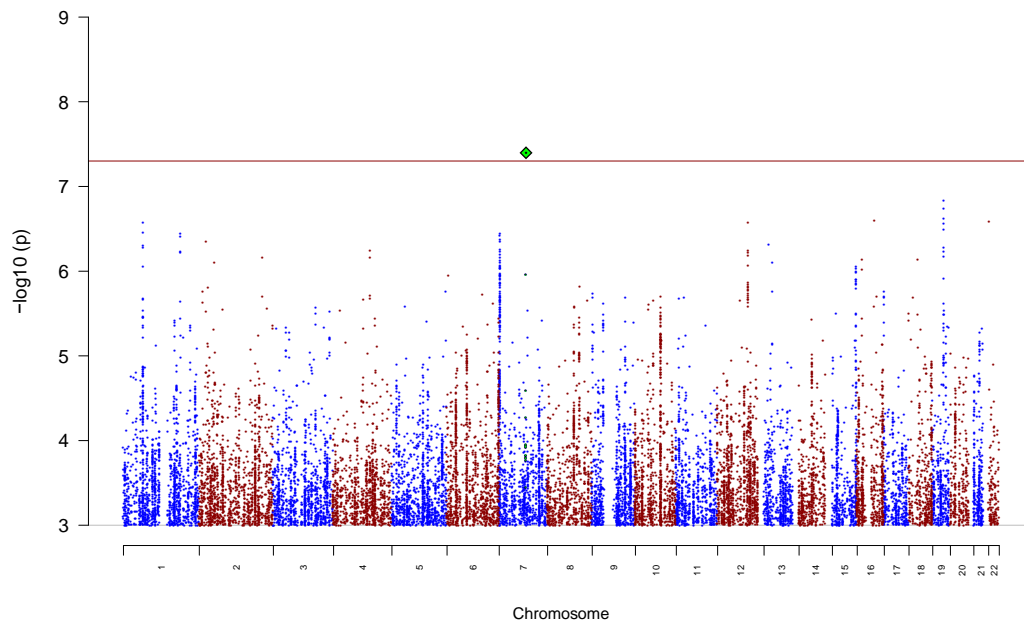

**eFigure 5.** Manhattan plot of the results from the GWAS of stress-related disorders

ICD-10; (F43.0-F43.9); 9831 cases and 19225 controls. The index variants in the most significant loci are highlighted as a diamond. Index variants located with a distance less than 400kb are considered as one locus. The full summary statistics of the data presented in this figure can be downloaded at our website. Please see the data availability section in the main manuscript for more details.

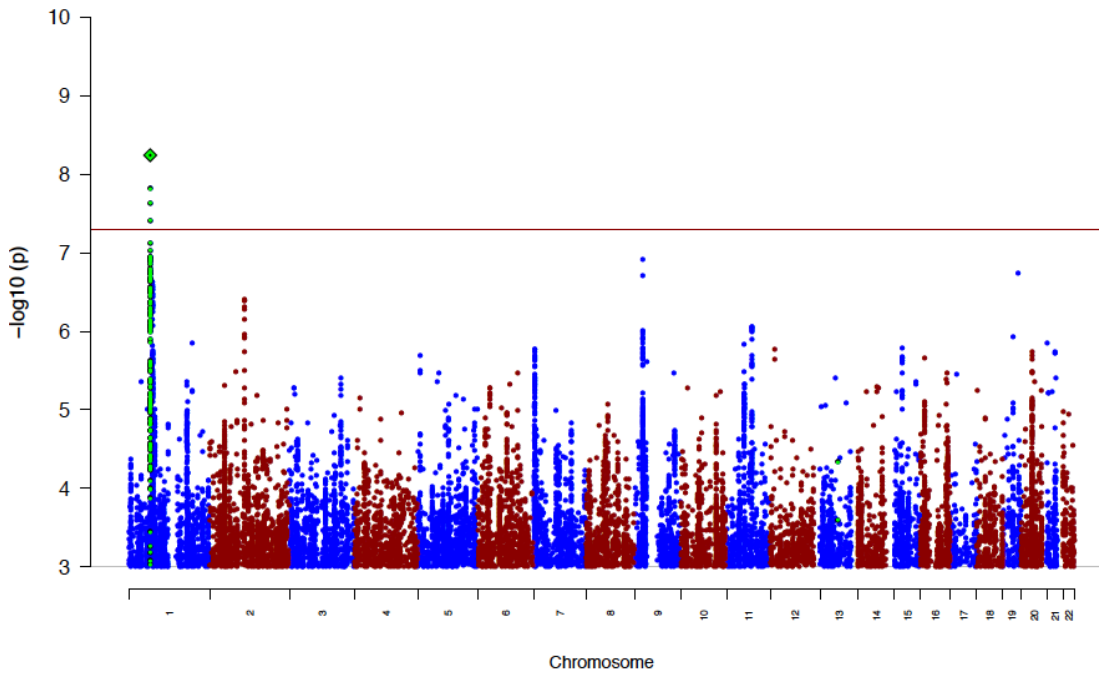

**eFigure 6.** Manhattan plot of the results from the GWAS excluding adjustment disorders

This GWAS includes 8517 cases and 19225 controls. The index variants in the most significant loci are highlighted as a diamond. Index variants located with a distance less than 400kb are considered as one locus. The full summary statistics of the data presented in this figure can be downloaded at our website. Please see the data availability section in the main manuscript for more details.

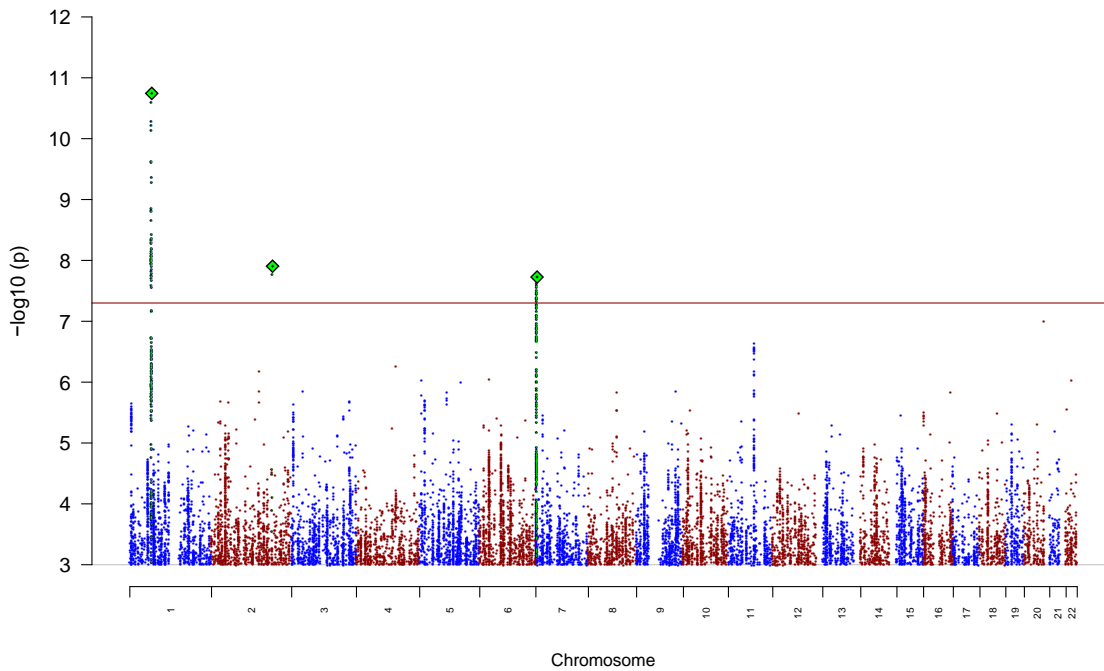

**eFigure 7.** Manhattan plot of the results from the GWAS for “population” Design

This GWAS mimics population-based comorbidity patterns (10311 cases and 19225 controls). The index variants in the most significant loci are highlighted as a diamond. Index variants located with a distance less than 400kb are considered as one locus. The full summary statistics of the data presented in this figure can be downloaded at our website. Please see the data availability section in the main manuscript for more details.

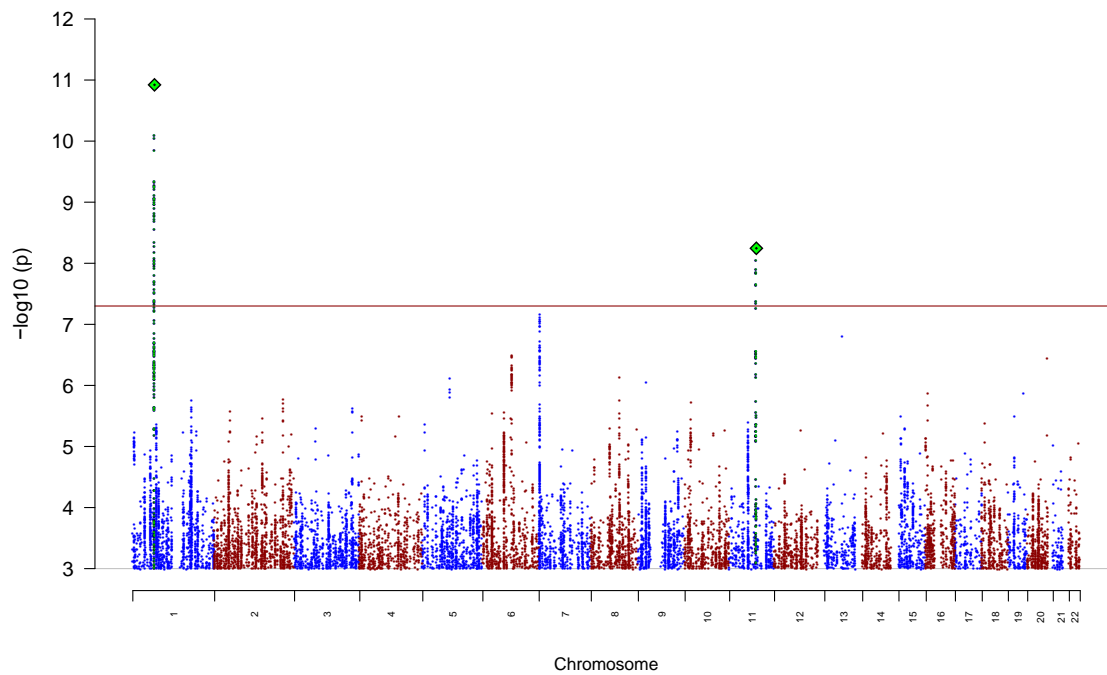

**eFigure 8.** Manhattan plot of the results from the GWAS for the “covariate” Design

This GWAS includes covariates of mental comorbidity (12096 cases and 42215 controls). The index variants in the most significant loci are highlighted as a diamond. Index variants located with a distance less than 400kb are considered as one locus. The full summary statistics of the data presented in this figure can be downloaded at our website. Please see the data availability section in the main manuscript for more details.

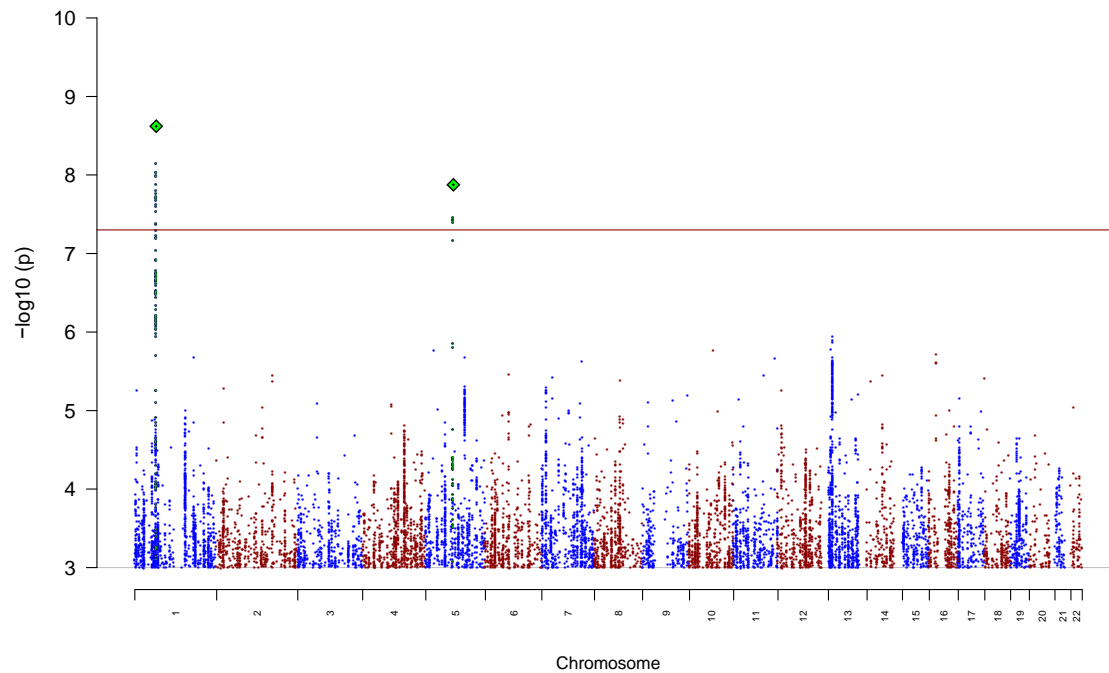

**eFigure 9.** Manhattan plot of the results from the GWAS for “propensity” Design

This GWAS uses a sample derived from propensity-score-matching (11599 cases and 11599 controls). The index variants in the most significant loci are highlighted as a diamond. Index variants located with a distance less than 400kb are considered as one locus. The full summary statistics of the data presented in this figure can be downloaded at our website. Please see the data availability section in the main manuscript for more details.

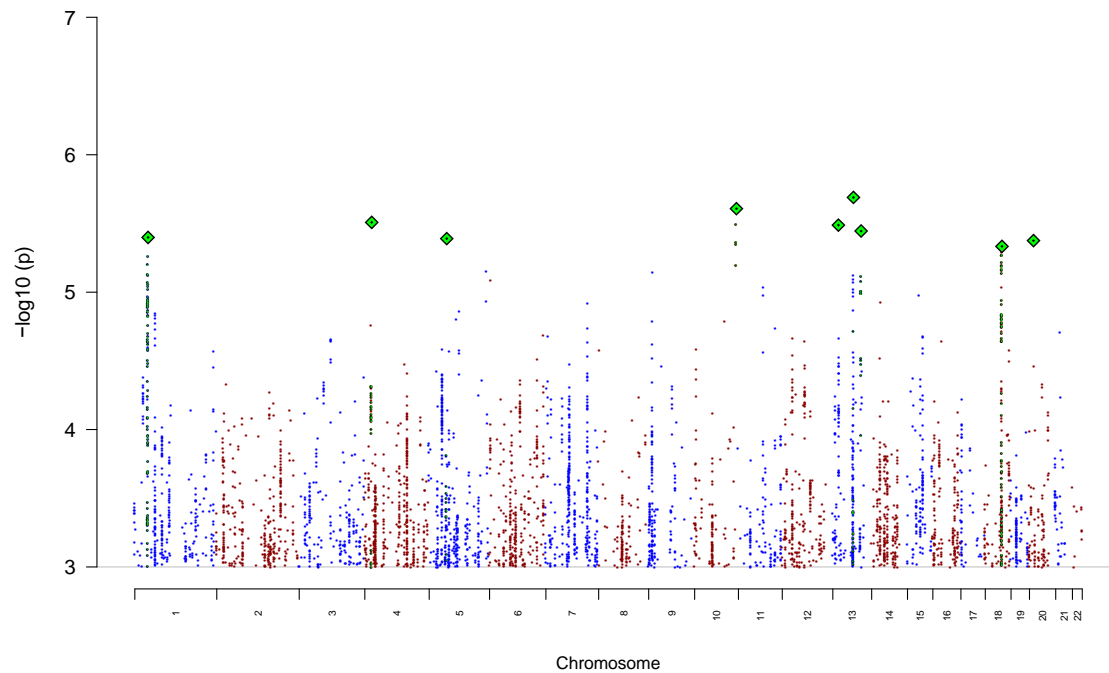



**eFigure 10.** Manhattan plot of the results from the GWAS excluding schizophrenia

This GWAS includes 11560 cases and 19225 controls. The index variants in the most significant loci are highlighted as a diamond. Index variants located with a distance less than 400kb are considered as one locus. The full summary statistics of the data presented in this figure can be downloaded at our website. Please see the data availability section in the main manuscript for more details.

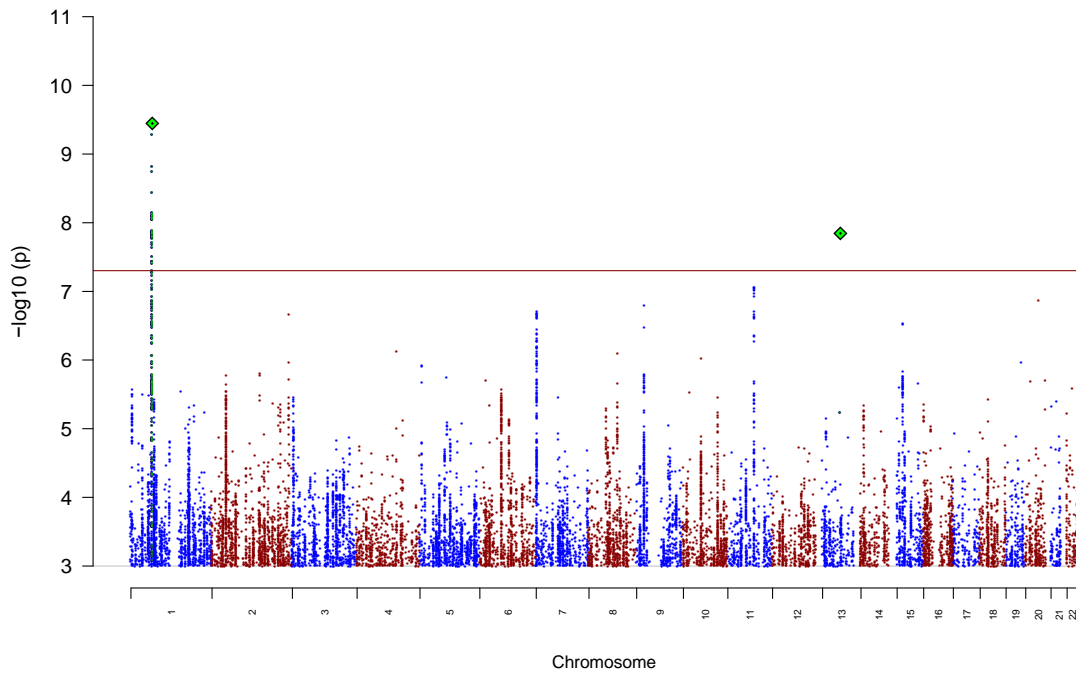

**eFigure 11.** Manhattan plot of the results from the GWAS including OCD

This GWAS includes 13533 cases and 19225 controls. The index variants in the most significant loci are highlighted as a diamond. Index variants located with a distance less than 400kb are considered as one locus. The full summary statistics of the data presented in this figure can be downloaded at our website. Please see the data availability section in the main manuscript for more details.

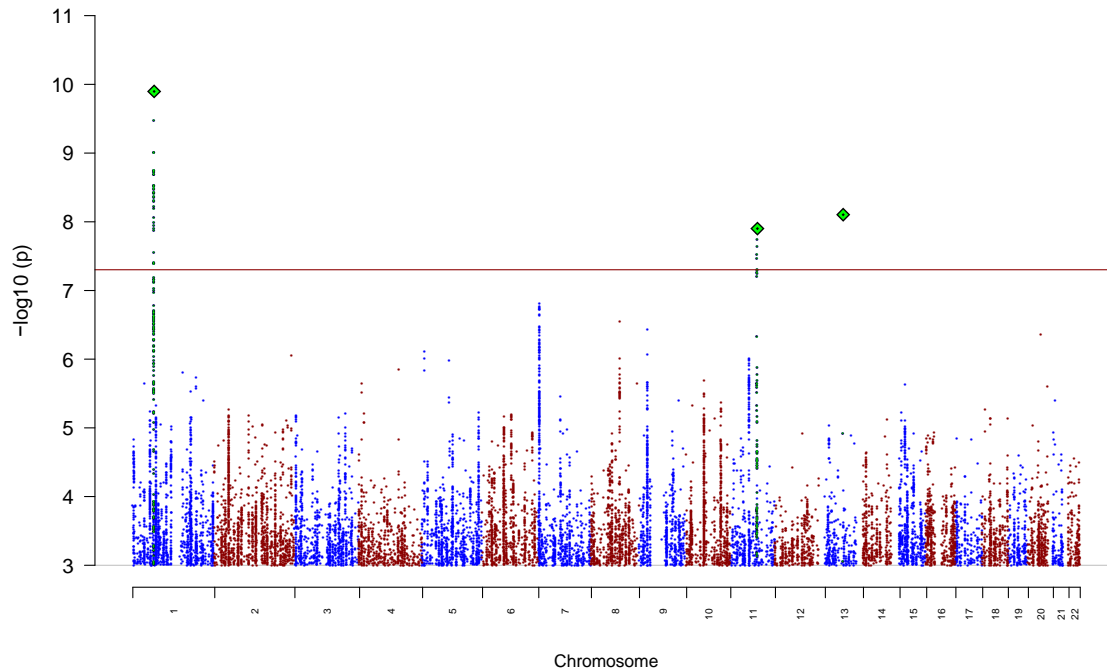

**eFigure 12.** Partitioning of heritability by functional annotations

Enrichment of heritability per SNP in 24 functional annotations defined by Finucane et al.<sup>19</sup> Error bars represent 95% confidence intervals. P-values for annotation categories with nominal significant enrichment are shown. CTCF= CCCTC binding factor, DGF= digital genomic footprint, DHS= DNase I hypersensitive site, TFBS=transcription factor binding site, TSS= transcription start site.

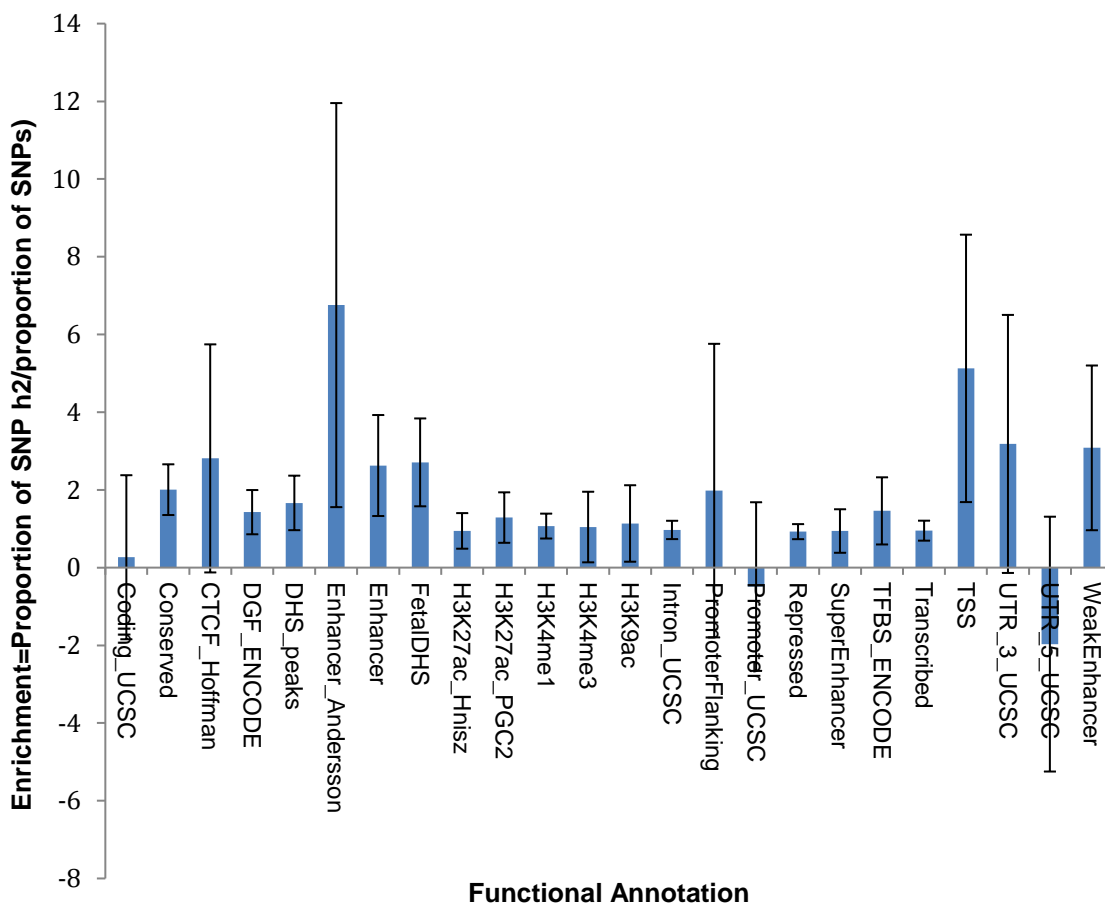

**eFigure 13.** Partitioning of heritability by tissue-group annotations

Results from partitioning heritability by SNPs located in cell-group specific regulatory elements. The line indicates significance after Bonferroni correction ( $P = 0.005$ ).

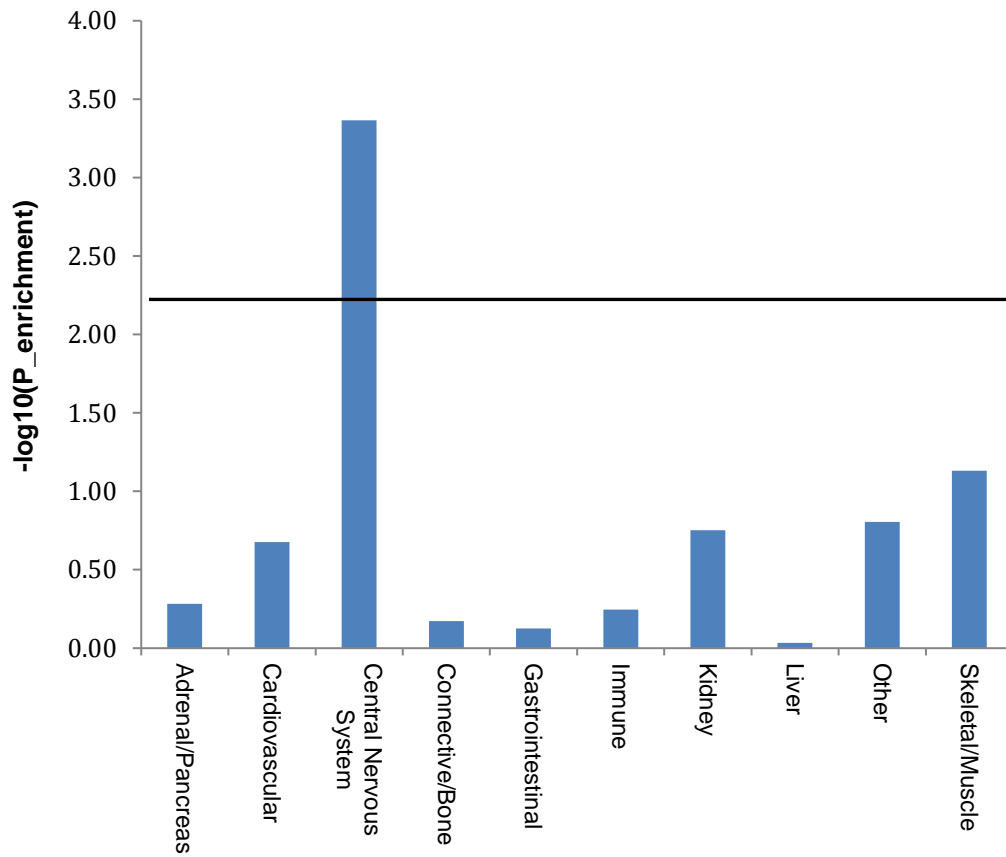



**eFigure 15.** Multivariate regression of normalized polygenic risk scores on diagnostic subtypes

In this analysis controls are the reference group and the regression is adjusted for waves and relevant principal components, whiskers indicate 95%-Confidence Interval (CI). The phenotypes are schizophrenia, major depression (both with the Danish samples removed), subjective well-being, and neuroticism.

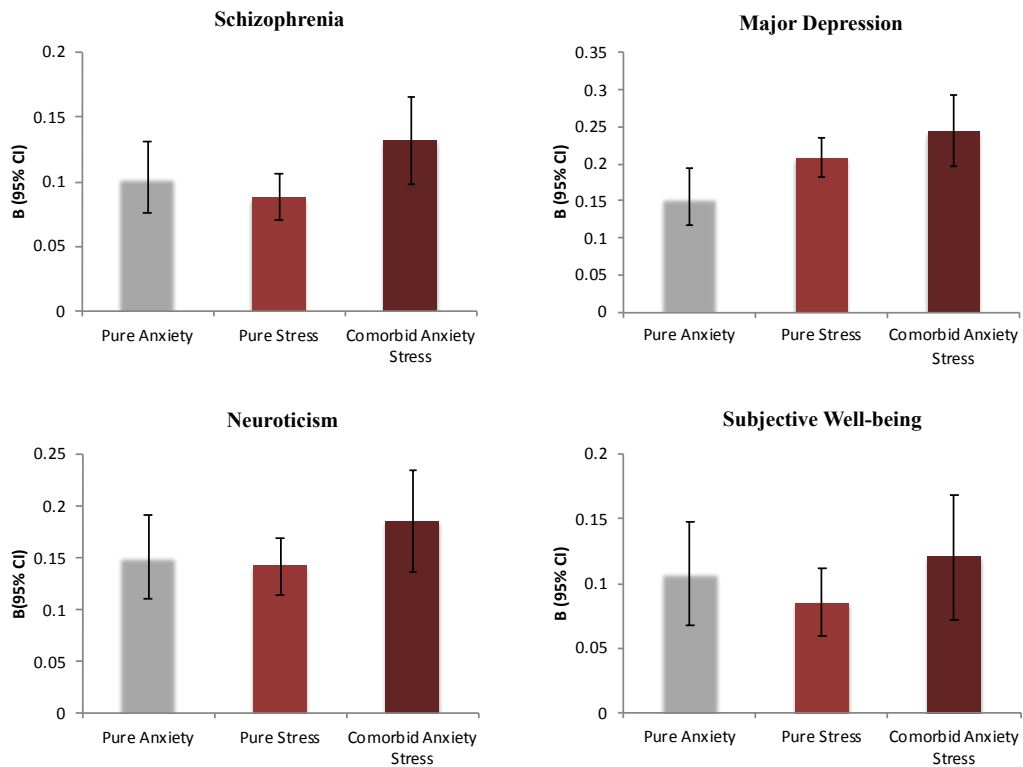

**eFigure 16.** Multivariate regression of normalized polygenic risk scores on comorbid subgroups

In this analysis the controls are the reference group and the regression is adjusted for waves and relevant principal components, whiskers indicate 95%-Confidence Interval (CI). The phenotypes are schizophrenia, major depression (both with the Danish samples removed), subjective well-being, and neuroticism. ADHD= Attention-deficit/hyperactivity disorder, ANX= Anorexia Nervosa, MDD= Major depression, SCZ= Schizophrenia, BP= Bipolar disorder.

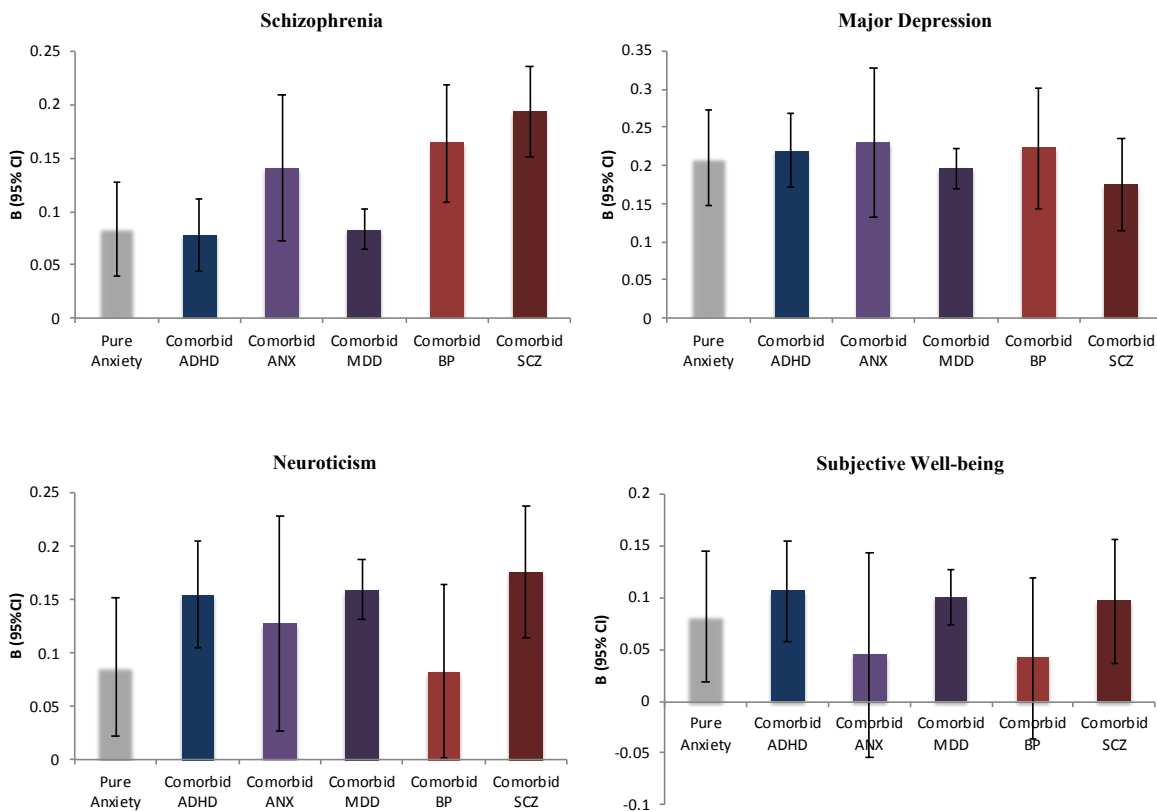

**eTable 1.** Summary of results for PDE4B

N cases= number of cases in the analysis; N controls= number of controls in the analysis; SNP= index SNP located within *PDE4B* for which the strongest association was observed; P-value= P-value for observed association; OCD= obsessive-compulsive disorder.

| Analysis                  |  | N cases | N controls | SNP        | P-value                |
|---------------------------|--|---------|------------|------------|------------------------|
| Naïve Analysis            |  | 12665   | 19225      | rs7528604  | 5.39*10 <sup>-11</sup> |
|                           |  |         |            |            |                        |
| Anxiety disorders         |  | 4584    | 19225      | rs7528604  | 2.62*10 <sup>-7</sup>  |
| Stress disorders          |  | 9831    | 19225      | rs7528604  | 5.71*10 <sup>-9</sup>  |
|                           |  |         |            |            |                        |
| Prevalence                |  | 10311   | 19225      | rs7528604  | 1.20*10 <sup>-11</sup> |
| Covariates                |  | 12096   | 42215      | rs7528604  | 2.32*10 <sup>-8</sup>  |
| Propensity                |  | 11599   | 11599      | rs17128482 | 1.43*10 <sup>-5</sup>  |
|                           |  |         |            |            |                        |
| Exc. Adjustment disorders |  | 8517    | 19225      | rs7528604  | 1.80*10 <sup>-11</sup> |
| Exc. Schizophrenia        |  | 11560   | 19225      | rs7528604  | 3.58*10 <sup>-10</sup> |
| Incl. OCD                 |  | 13533   | 19225      | rs7528604  | 1.27*10 <sup>-10</sup> |



**eTable 2.** Gene-based test results

The top twenty genes from gene-based analysis, using MAGMA, are provided. CHR= Chromosome.

| <b>Gene</b>     | <b>CHR</b> | <b>Start</b> | <b>Stop</b> | <b>P-value</b>         |
|-----------------|------------|--------------|-------------|------------------------|
| <i>PDE4B</i>    | 1          | 66223193     | 66850262    | 4.74*10 <sup>-15</sup> |
| <i>GCHFR</i>    | 15         | 41021285     | 41069911    | 3..30*10 <sup>-7</sup> |
| <i>SDK1</i>     | 7          | 3306080      | 4318632     | 5.79*10 <sup>-7</sup>  |
| <i>RMDN3</i>    | 15         | 41018085     | 41082458    | 9.36*10 <sup>-7</sup>  |
| <i>C15orf62</i> | 15         | 41027159     | 41074647    | 1.76*10 <sup>-6</sup>  |
| <i>RAD51</i>    | 15         | 40952327     | 41034356    | 2.58*10 <sup>-6</sup>  |
| <i>SORCS3</i>   | 10         | 106365859    | 107034993   | 3.01*10 <sup>-6</sup>  |
| <i>PCDH15</i>   | 10         | 55552531     | 56596051    | 7.14*10 <sup>-6</sup>  |
| <i>PREPL</i>    | 2          | 44534746     | 44624001    | 1.35*10 <sup>-5</sup>  |
| <i>AMMECRIL</i> | 2          | 128609204    | 128678635   | 1.47*10 <sup>-5</sup>  |
| <i>CAMKMT</i>   | 2          | 44554043     | 45009731    | 1.51*10 <sup>-5</sup>  |
| <i>USP24</i>    | 1          | 55522032     | 55716039    | 1.59*10 <sup>-5</sup>  |
| <i>F2RL2</i>    | 5          | 75901307     | 75954259    | 1.92*10 <sup>-5</sup>  |
| <i>DUSP6</i>    | 12         | 89731837     | 89781296    | 2.43*10 <sup>-5</sup>  |
| <i>ITGB6</i>    | 2          | 160946182    | 161145349   | 2.59*10 <sup>-5</sup>  |
| <i>MED19</i>    | 11         | 57461182     | 57514804    | 2.72*10 <sup>-5</sup>  |
| <i>TMX2</i>     | 11         | 57444995     | 57518445    | 3.08*10 <sup>-5</sup>  |
| <i>CTNND1</i>   | 11         | 57485756     | 57596652    | 3.20*10 <sup>-5</sup>  |
| <i>CUBN</i>     | 10         | 16855965     | 17206816    | 3.33*10 <sup>-5</sup>  |
|                 |            |              |             |                        |

**eTable 3.** Pathway analysis results

The top twenty pathways from pathway analysis, using MAGMA, are provided.

| Pathway Name                                                                                    | NGenes | P-value               |
|-------------------------------------------------------------------------------------------------|--------|-----------------------|
| GO_TRANSCRIPTIONAL_REPRESSOR_ACTIVITY_RNA_POLYMERASE_II_ACTIVATING_TRANSCRIPTION_FACTOR_BINDING | 50     | 4.79*10 <sup>-6</sup> |
| NKX3A_01                                                                                        | 210    | 1.05*10 <sup>-5</sup> |
| GO_TRANSCRIPTION_FACTOR_ACTIVITY_RNA_POLYMERASE_II_TRANSCRIPTION_FACTOR_BINDING                 | 127    | 1.69*10 <sup>-5</sup> |
| HUNSBERGER_EXERCISE_REGULATED_GENES                                                             | 28     | 4.31*10 <sup>-5</sup> |
| GSE12198_CTRL_VS_HIGH_IL2_STIM_NK_CELL_UP                                                       | 193    | 5.31*10 <sup>-5</sup> |
| GO_TRANSCRIPTIONAL_REPRESSOR_ACTIVITY_RNA_POLYMERASE_II_TRANSCRIPTION_FACTOR_BINDING            | 81     | 6.80*10 <sup>-5</sup> |
| GGGNNTTCC_NFKB_Q6_01                                                                            | 229    | 1.09*10 <sup>-4</sup> |
| JEPSEN_SMRT_TARGETS                                                                             | 28     | 1.14*10 <sup>-4</sup> |
| GTTTGTT_MIR495                                                                                  | 237    | 1.15*10 <sup>-4</sup> |
| GSE16385_ROSIGLITAZONE_IL4_VS_IL4_ALONE_STIM_MACROPHAGE_12H_DN                                  | 189    | 1.16*10 <sup>-4</sup> |
| GO_BEHAVIORAL_RESPONSE_TO_COCAINE                                                               | 12     | 2.23*10 <sup>-4</sup> |
| GO_COPI_COATED_VESICLE_MEMBRANE                                                                 | 17     | 2.27*10 <sup>-4</sup> |
| ASGHARZADEH_NEUROBLASTOMA_POOR_SURVIVAL_DN                                                      | 42     | 3.25*10 <sup>-4</sup> |
| TGFB_UP.V1_UP                                                                                   | 181    | 3.43*10 <sup>-4</sup> |
| GO_N_ACETYLGUCOSAMINE_METABOLIC_PROCESS                                                         | 14     | 3.75*10 <sup>-4</sup> |
| AACTTT_UNKNOWN                                                                                  | 135    | 3.77*10 <sup>-4</sup> |
| GO_COPI_COATED_VESICLE                                                                          | 22     | 4.40*10 <sup>-4</sup> |
| GSE14415_INDUCED_TREG_VS_TCONV_DN                                                               | 147    | 4.62*10 <sup>-4</sup> |
| GSE15659_CD45RA_NEG_CD4_TCELL_VS_RESTING_TREG_UPNA                                              | 173    | 4.75*10 <sup>-4</sup> |

**eTable 4.** Genetic correlations for “naïve” Design

All results from LDhub analyses. Trait= trait against which genetic correlation was calculated. PMID= PMID for publication that belongs to tested summary statistics. rG= genetic correlation. SE= standard error for genetic correlation. Z= Z-score. p= P-value for genetic correlation analysis. ethnicity= sample ethnicity for sample referenced in “Trait” column. h2\_obs= Heritability on the observed scale for sample referenced in “Trait”. se= standard errors for variable reported in the cell to the left (i.e. h2\_obs, ht\_int, gcov\_int). h2\_int= LD score intercept for sample referenced in “Trait”. gcov\_int= cross-trait LD Score regression intercept.

| Trait                                            | PMID     | Category          | rg      | SE     | z        | p        | ethnicity | h2_obs | se     | h2_int | se     | gcov_int | se     |
|--------------------------------------------------|----------|-------------------|---------|--------|----------|----------|-----------|--------|--------|--------|--------|----------|--------|
| Age of first birth                               | 27798627 | reproductive      | -0.5164 | 0.0516 | -10.0000 | 1.52E-23 | European  | 0.0625 | 0.0036 | 0.9535 | 0.0083 | -0.0034  | 0.0063 |
| Years of schooling 2016                          | 27225129 | education         | -0.3553 | 0.0379 | -9.3739  | 6.99E-21 | European  | 0.1247 | 0.0046 | 0.9379 | 0.0107 | -0.0084  | 0.0066 |
| Depressive symptoms                              | 27089181 | psychiatric       | 0.7329  | 0.0805 | 9.1100   | 8.24E-20 | European  | 0.0468 | 0.0040 | 1.0026 | 0.0076 | -0.0034  | 0.0060 |
| Schizophrenia                                    | 25056061 | psychiatric       | 0.3043  | 0.0431 | 7.0684   | 1.57E-12 | Mixed     | 0.4529 | 0.0198 | 1.0609 | 0.0133 | 0.0061   | 0.0075 |
| College completion                               | 23722424 | education         | -0.3605 | 0.0529 | -6.8076  | 9.93E-12 | European  | 0.0786 | 0.0057 | 1.0229 | 0.0087 | 0.0015   | 0.0060 |
| Intelligence                                     | 28530673 | cognitive         | -0.2756 | 0.0411 | -6.7059  | 2.00E-11 | European  | 0.1881 | 0.0106 | 1.0106 | 0.0088 | 0.0037   | 0.0049 |
| PGC cross-disorder analysis                      | 23453885 | psychiatric       | 0.4000  | 0.0616 | 6.4963   | 8.23E-11 | European  | 0.1717 | 0.0130 | 1.0153 | 0.0116 | 0.0051   | 0.0072 |
| Subjective well being                            | 27089181 | psychiatric       | -0.4554 | 0.0726 | -6.2734  | 3.53E-10 | European  | 0.0249 | 0.0020 | 1.0028 | 0.0073 | 0.0039   | 0.0059 |
| Years of schooling (proxy cognitive performance) | 25201988 | education         | -0.3261 | 0.0534 | -6.1020  | 1.05E-09 | European  | 0.1060 | 0.0076 | 1.0285 | 0.0093 | -0.0074  | 0.0063 |
| Insomnia                                         | 28604731 | sleeping          | 0.4290  | 0.0715 | 6.0025   | 1.94E-09 | European  | 0.0477 | 0.0051 | 1.0027 | 0.0070 | -0.0013  | 0.0049 |
| Years of schooling 2013                          | 23722424 | education         | -0.3296 | 0.0550 | -5.9927  | 2.06E-09 | European  | 0.0837 | 0.0062 | 1.0205 | 0.0091 | -0.0057  | 0.0063 |
| Major depressive disorder                        | 22472876 | psychiatric       | 0.5756  | 0.0995 | 5.7863   | 7.20E-09 | European  | 0.1511 | 0.0263 | 1.0136 | 0.0065 | 0.0020   | 0.0056 |
| Number of children ever born                     | 27798627 | reproductive      | 0.3378  | 0.0626 | 5.3962   | 6.81E-08 | European  | 0.0254 | 0.0019 | 0.9716 | 0.0072 | -0.0130  | 0.0057 |
| Neuroticism                                      | 27089181 | personality       | 0.4924  | 0.0941 | 5.2346   | 1.65E-07 | European  | 0.0897 | 0.0082 | 0.9885 | 0.0133 | -0.0006  | 0.0078 |
| Ever vs never smoked                             | 20418890 | smoking behaviour | 0.3182  | 0.0670 | 4.7468   | 2.07E-06 | European  | 0.0727 | 0.0066 | 1.0004 | 0.0062 | 0.0036   | 0.0049 |
| Mothers age at death                             | 27015805 | aging             | -0.4822 | 0.1043 | -4.6207  | 3.82E-06 | European  | 0.0374 | 0.0071 | 1.0103 | 0.0072 | 0.0046   | 0.0053 |
| Coronary artery disease                          | 26343387 | cardiometabolic   | 0.1933  | 0.0420 | 4.6060   | 4.10E-06 | Mixed     | 0.0781 | 0.0057 | 1.0487 | 0.0096 | 0.0083   | 0.0055 |
| Insomnia                                         | 27992416 | sleeping          | 0.3410  | 0.0743 | 4.5881   | 4.47E-06 | European  | 0.1344 | 0.0118 | 1.0015 | 0.0082 | 0.0013   | 0.0058 |
| Body mass index                                  | 20935630 | anthropometric    | 0.1661  | 0.0374 | 4.4435   | 8.85E-06 | European  | 0.1905 | 0.0095 | 1.0090 | 0.0106 | 0.0005   | 0.0064 |
| Overweight                                       | 23563607 | anthropometric    | 0.2055  | 0.0465 | 4.4203   | 9.85E-06 | European  | 0.1096 | 0.0067 | 1.0243 | 0.0098 | -0.0072  | 0.0060 |
| Waist-to-hip ratio                               | 25673412 | anthropometric    | 0.1866  | 0.0423 | 4.4063   | 1.05E-05 | European  | 0.1141 | 0.0073 | 0.9179 | 0.0095 | 0.0032   | 0.0055 |

| Trait                                             | PMID     | Category          | rg      | SE     | z       | p        | ethnicity | h2_obs | se     | h2_int | se     | gcov_int | se     |
|---------------------------------------------------|----------|-------------------|---------|--------|---------|----------|-----------|--------|--------|--------|--------|----------|--------|
| Obesity class 1                                   | 23563607 | anthropometric    | 0.1921  | 0.0440 | 4.3666  | 1.26E-05 | European  | 0.2171 | 0.0122 | 1.0187 | 0.0108 | 0.0049   | 0.0067 |
| Cigarettes smoked per day                         | 20418890 | smoking behaviour | 0.4493  | 0.1032 | 4.3537  | 1.34E-05 | European  | 0.0573 | 0.0155 | 1.0066 | 0.0068 | -0.0013  | 0.0047 |
| Lung cancer (all)                                 | 24880342 | cancer            | 0.4017  | 0.0950 | 4.2296  | 2.34E-05 | European  | 0.1272 | 0.0307 | 1.0080 | 0.0082 | -0.0041  | 0.0053 |
| Lung cancer                                       | 27488534 | cancer            | 0.3634  | 0.0862 | 4.2175  | 2.47E-05 | European  | 0.3210 | 0.0674 | 1.0131 | 0.0082 | -0.0047  | 0.0055 |
| Childhood IQ                                      | 23358156 | education         | -0.3724 | 0.0888 | -4.1926 | 2.76E-05 | European  | 0.2721 | 0.0453 | 1.0025 | 0.0094 | -0.0030  | 0.0061 |
| Neuroticism                                       | 24828478 | personality       | 0.5052  | 0.1227 | 4.1179  | 3.82E-05 | European  | 0.0131 | 0.0033 | 1.0141 | 0.0070 | 0.0016   | 0.0049 |
| Age at Menarche                                   | 25231870 | reproductive      | -0.1684 | 0.0417 | -4.0384 | 5.38E-05 | European  | 0.2061 | 0.0106 | 0.9448 | 0.0120 | 0.0001   | 0.0066 |
| Body fat                                          | 26833246 | anthropometric    | 0.2289  | 0.0583 | 3.9237  | 8.72E-05 | Mixed     | 0.1074 | 0.0083 | 0.9042 | 0.0069 | -0.0067  | 0.0057 |
| Excessive daytime sleepiness                      | 27992416 | sleeping          | 0.2459  | 0.0637 | 3.8582  | 1.00E-04 | European  | 0.0536 | 0.0049 | 1.0039 | 0.0071 | -0.0028  | 0.0054 |
| Obesity class 2                                   | 23563607 | anthropometric    | 0.2044  | 0.0535 | 3.8188  | 1.00E-04 | European  | 0.1836 | 0.0134 | 1.0032 | 0.0102 | 0.0053   | 0.0075 |
| Squamous cell lung cancer                         | 27488534 | cancer            | 0.4934  | 0.1405 | 3.5130  | 4.00E-04 | European  | 0.0372 | 0.0122 | 1.0121 | 0.0065 | -0.0081  | 0.0052 |
| Obesity class 3                                   | 23563607 | anthropometric    | 0.2412  | 0.0697 | 3.4598  | 5.00E-04 | European  | 0.1221 | 0.0150 | 0.9796 | 0.0095 | 0.0029   | 0.0068 |
| Waist circumference                               | 25673412 | anthropometric    | 0.1281  | 0.0375 | 3.4129  | 6.00E-04 | European  | 0.1215 | 0.0051 | 0.8444 | 0.0085 | 0.0053   | 0.0054 |
| Lung cancer (squamous cell)                       | 24880342 | cancer            | 0.5750  | 0.1705 | 3.3729  | 7.00E-04 | European  | 0.0490 | 0.0199 | 1.0076 | 0.0070 | -0.0095  | 0.0053 |
| Bipolar disorder                                  | 21926972 | psychiatric       | 0.2086  | 0.0645 | 3.2336  | 1.20E-03 | European  | 0.4171 | 0.0390 | 1.0283 | 0.0084 | -0.0002  | 0.0053 |
| Attention deficit hyperactivity disorder (GC)     | 27663945 | psychiatric       | 0.4827  | 0.1513 | 3.1912  | 1.40E-03 | European  | 0.0791 | 0.0292 | 0.9906 | 0.0076 | 0.0070   | 0.0053 |
| Attention deficit hyperactivity disorder (No GC)  | 27663945 | psychiatric       | 0.4807  | 0.1505 | 3.1941  | 1.40E-03 | European  | 0.0802 | 0.0295 | 1.0052 | 0.0077 | 0.0072   | 0.0054 |
| Fathers age at death                              | 27015805 | aging             | -0.2829 | 0.0913 | -3.0969 | 2.00E-03 | European  | 0.0397 | 0.0067 | 1.0185 | 0.0069 | -0.0042  | 0.0053 |
| Parents age at death                              | 27015805 | aging             | -0.3276 | 0.1058 | -3.0959 | 2.00E-03 | European  | 0.0302 | 0.0070 | 1.0142 | 0.0067 | 0.0047   | 0.0047 |
| Height_2010                                       | 20881960 | anthropometric    | -0.1067 | 0.0351 | -3.0435 | 2.30E-03 | European  | 0.2874 | 0.0165 | 1.0145 | 0.0192 | -0.0081  | 0.0068 |
| Extreme BMI                                       | 23563607 | anthropometric    | 0.1657  | 0.0558 | 2.9713  | 3.00E-03 | European  | 0.6894 | 0.0557 | 1.0308 | 0.0122 | -0.0033  | 0.0075 |
| Childhood obesity                                 | 22484627 | anthropometric    | 0.1730  | 0.0590 | 2.9319  | 3.40E-03 | European  | 0.4223 | 0.0440 | 0.9241 | 0.0076 | -0.0014  | 0.0049 |
| Attention deficit hyperactivity disorder          | 20732625 | psychiatric       | 0.4089  | 0.1524 | 2.6822  | 7.30E-03 | European  | 0.2251 | 0.0945 | 1.0089 | 0.0067 | -0.0041  | 0.0047 |
| Glycoprotein acetyls; mainly a1-acid glycoprotein | 27005778 | metabolites       | 0.2819  | 0.1078 | 2.6154  | 8.90E-03 | European  | 0.1056 | 0.0296 | 0.9836 | 0.0067 | -0.0002  | 0.0048 |
| Extreme waist-to-hip ratio                        | 23563607 | anthropometric    | 0.2324  | 0.0917 | 2.5353  | 1.12E-02 | European  | 0.3565 | 0.0594 | 0.9779 | 0.0084 | -0.0089  | 0.0068 |
| Asthma                                            | 17611496 | autoimmune        | 0.2265  | 0.0904 | 2.5060  | 1.22E-02 | European  | 0.1234 | 0.0296 | 1.0073 | 0.0094 | 0.0010   | 0.0058 |
| Age at Menopause                                  | 26414677 | reproductive      | -0.1363 | 0.0556 | -2.4515 | 1.42E-02 | European  | 0.1349 | 0.0158 | 0.9916 | 0.0141 | 0.0008   | 0.0055 |
| Extreme height                                    | 23563607 | anthropometric    | -0.1168 | 0.0485 | -2.4094 | 1.60E-02 | European  | 1.2498 | 0.1063 | 1.0305 | 0.0181 | 0.0004   | 0.0078 |

| Trait                                                                    | PMID     | Category          | rg      | SE     | z       | p        | ethnicity | h2_obs | se     | h2_int | se     | gcov_int | se     |
|--------------------------------------------------------------------------|----------|-------------------|---------|--------|---------|----------|-----------|--------|--------|--------|--------|----------|--------|
| Mean platelet volume                                                     | 22139419 | haematological    | 0.1550  | 0.0656 | 2.3615  | 1.82E-02 | European  | 0.3193 | 0.0505 | 0.9816 | 0.0101 | -0.0109  | 0.0057 |
| Former vs Current smoker                                                 | 20418890 | smoking behaviour | -0.2284 | 0.1005 | -2.2731 | 2.30E-02 | European  | 0.0584 | 0.0109 | 1.0048 | 0.0069 | -0.0079  | 0.0052 |
| Total lipids in small HDL                                                | 27005778 | metabolites       | 0.3269  | 0.1450 | 2.2541  | 2.42E-02 | European  | 0.0509 | 0.0272 | 1.0038 | 0.0078 | -0.0015  | 0.0046 |
| Lung adenocarcinoma                                                      | 27488534 | cancer            | 0.3025  | 0.1359 | 2.2250  | 2.61E-02 | European  | 0.0310 | 0.0121 | 1.0195 | 0.0069 | -0.0027  | 0.0049 |
| Multiple sclerosis                                                       | 21833088 | autoimmune        | 0.3851  | 0.1815 | 2.1220  | 3.38E-02 | European  | 0.0581 | 0.0280 | 1.0583 | 0.0089 | -0.0081  | 0.0059 |
| Anorexia Nervosa                                                         | 24514567 | psychiatric       | 0.1107  | 0.0528 | 2.0950  | 3.62E-02 | European  | 0.5258 | 0.0299 | 0.9087 | 0.0071 | 0.0053   | 0.0055 |
| Forced expiratory volume in 1 second (FEV1)                              | 26635082 | lung function     | -0.1215 | 0.0599 | -2.0271 | 4.27E-02 | European  | 0.1431 | 0.0158 | 0.9898 | 0.0070 | -0.0016  | 0.0049 |
| HDL cholesterol                                                          | 20686565 | lipids            | -0.0961 | 0.0497 | -1.9313 | 5.34E-02 | European  | 0.1256 | 0.0246 | 1.0620 | 0.0526 | -0.0036  | 0.0058 |
| Triglycerides                                                            | 20686565 | lipids            | 0.1088  | 0.0568 | 1.9134  | 5.57E-02 | European  | 0.1691 | 0.0300 | 0.9674 | 0.0172 | 0.0066   | 0.0066 |
| Free cholesterol in very large HDL                                       | 27005778 | metabolites       | -0.2949 | 0.1569 | -1.8790 | 6.02E-02 | European  | 0.0472 | 0.0245 | 1.0151 | 0.0148 | 0.0041   | 0.0049 |
| Average number of methylene groups per a double bond                     | 27005778 | metabolites       | 0.1597  | 0.0867 | 1.8418  | 6.55E-02 | European  | 0.2049 | 0.0750 | 0.9946 | 0.0087 | -0.0021  | 0.0046 |
| Mean diameter for HDL particles                                          | 27005778 | metabolites       | -0.1844 | 0.1055 | -1.7479 | 8.05E-02 | European  | 0.1149 | 0.0292 | 1.0102 | 0.0208 | 0.0030   | 0.0048 |
| Total cholesterol in very large HDL                                      | 27005778 | metabolites       | -0.3252 | 0.1868 | -1.7403 | 8.18E-02 | European  | 0.0365 | 0.0224 | 1.0120 | 0.0122 | 0.0060   | 0.0048 |
| Amyotrophic lateral sclerosis                                            | 27455348 | neurological      | 0.2033  | 0.1171 | 1.7367  | 8.24E-02 | European  | 0.0488 | 0.0130 | 0.9950 | 0.0067 | -0.0003  | 0.0050 |
| Leptin_not_adjBMI                                                        | 26833098 | hormone           | 0.1528  | 0.0881 | 1.7343  | 8.29E-02 | European  | 0.0946 | 0.0164 | 0.9972 | 0.0068 | 0.0003   | 0.0050 |
| Child birth weight                                                       | 23202124 | anthropometric    | -0.1339 | 0.0775 | -1.7272 | 8.41E-02 | European  | 0.1139 | 0.0179 | 1.0037 | 0.0057 | -0.0002  | 0.0045 |
| Ratio of bisallylic groups to total fatty acids                          | 27005778 | metabolites       | -0.1326 | 0.0782 | -1.6964 | 8.98E-02 | European  | 0.2811 | 0.0921 | 0.9839 | 0.0089 | -0.0005  | 0.0048 |
| Tyrosine                                                                 | 27005778 | metabolites       | 0.1858  | 0.1123 | 1.6548  | 9.80E-02 | European  | 0.0749 | 0.0280 | 0.9991 | 0.0074 | -0.0103  | 0.0048 |
| Phospholipids in chylomicrons and largest VLDL particles                 | 27005778 | metabolites       | 0.1440  | 0.0874 | 1.6474  | 9.95E-02 | European  | 0.1074 | 0.0264 | 0.9804 | 0.0065 | 0.0007   | 0.0050 |
| Description of average fatty acid chain length; not actual carbon number | 27005778 | metabolites       | -0.1957 | 0.1207 | -1.6209 | 1.05E-01 | European  | 0.1134 | 0.0378 | 0.9794 | 0.0076 | 0.0048   | 0.0052 |
| Glucose                                                                  | 27005778 | metabolites       | 0.1492  | 0.0951 | 1.5701  | 1.16E-01 | European  | 0.0881 | 0.0224 | 0.9946 | 0.0068 | -0.0067  | 0.0048 |
| Total lipids in very large HDL                                           | 27005778 | metabolites       | -0.2342 | 0.1518 | -1.5432 | 1.23E-01 | European  | 0.0589 | 0.0275 | 1.0168 | 0.0160 | 0.0038   | 0.0052 |
| Phospholipids in very large HDL                                          | 27005778 | metabolites       | -0.1789 | 0.1171 | -1.5282 | 1.27E-01 | European  | 0.0865 | 0.0293 | 1.0099 | 0.0184 | 0.0009   | 0.0049 |
| Neo-openness to experience                                               | 21173776 | personality       | 0.1651  | 0.1084 | 1.5227  | 1.28E-01 | European  | 0.1037 | 0.0273 | 0.9927 | 0.0070 | -0.0065  | 0.0053 |

| Trait                                              | PMID     | Category       | rg      | SE     | z       | p        | ethnicity | h2_obs | se     | h2_int | se     | gcov_int | se     |
|----------------------------------------------------|----------|----------------|---------|--------|---------|----------|-----------|--------|--------|--------|--------|----------|--------|
| Primary sclerosing cholangitis                     | 27992413 | autoimmune     | -0.0892 | 0.0592 | -1.5062 | 1.32E-01 | Mixed     | 0.3961 | 0.1621 | 0.9944 | 0.0164 | -0.0049  | 0.0057 |
| Concentration of large VLDL particles              | 27005778 | metabolites    | 0.1234  | 0.0836 | 1.4751  | 1.40E-01 | European  | 0.1401 | 0.0337 | 0.9708 | 0.0073 | 0.0012   | 0.0047 |
| Sleep duration                                     | 27494321 | sleeping       | -0.1143 | 0.0775 | -1.4734 | 1.41E-01 | European  | 0.0546 | 0.0052 | 1.0223 | 0.0080 | -0.0045  | 0.0058 |
| Neo-conscientiousness                              | 21173776 | personality    | -0.2333 | 0.1638 | -1.4245 | 1.54E-01 | European  | 0.0686 | 0.0302 | 1.0020 | 0.0069 | 0.0041   | 0.0053 |
| Total cholesterol in large HDL                     | 27005778 | metabolites    | -0.1441 | 0.1022 | -1.4090 | 1.59E-01 | European  | 0.1041 | 0.0260 | 1.0069 | 0.0152 | -0.0002  | 0.0047 |
| Citrate                                            | 27005778 | metabolites    | -0.1768 | 0.1257 | -1.4063 | 1.60E-01 | European  | 0.0662 | 0.0226 | 1.0144 | 0.0077 | -0.0008  | 0.0049 |
| Concentration of medium VLDL particles             | 27005778 | metabolites    | 0.1083  | 0.0806 | 1.3433  | 1.79E-01 | European  | 0.1506 | 0.0349 | 0.9802 | 0.0076 | 0.0043   | 0.0046 |
| Forced Vital capacity (FVC)                        | 28166213 | lung function  | -0.0687 | 0.0517 | -1.3305 | 1.83E-01 | European  | 0.2587 | 0.0158 | 0.9783 | 0.0080 | 0.0005   | 0.0055 |
| Acetoacetate                                       | 27005778 | metabolites    | 0.1380  | 0.1068 | 1.2927  | 1.96E-01 | European  | 0.0817 | 0.0296 | 0.9768 | 0.0073 | 0.0042   | 0.0050 |
| Free cholesterol in large HDL                      | 27005778 | metabolites    | -0.1283 | 0.1005 | -1.2762 | 2.02E-01 | European  | 0.1061 | 0.0268 | 1.0083 | 0.0151 | -0.0011  | 0.0048 |
| Urinary albumin-to-creatinine ratio (non-diabetes) | 26631737 | kidney         | 0.1082  | 0.0879 | 1.2303  | 2.19E-01 | European  | 0.0532 | 0.0106 | 0.9950 | 0.0073 | -0.0037  | 0.0050 |
| Phospholipids in medium LDL                        | 27005778 | metabolites    | 0.1385  | 0.1130 | 1.2262  | 2.20E-01 | European  | 0.0713 | 0.0394 | 1.0092 | 0.0176 | 0.0025   | 0.0048 |
| Concentration of very large VLDL particles         | 27005778 | metabolites    | 0.1124  | 0.0928 | 1.2108  | 2.26E-01 | European  | 0.1338 | 0.0304 | 0.9801 | 0.0075 | 0.0006   | 0.0049 |
| Ratio of bisallylic groups to double bonds         | 27005778 | metabolites    | -0.0863 | 0.0719 | -1.2008 | 2.30E-01 | European  | 0.3008 | 0.1001 | 0.9760 | 0.0101 | -0.0037  | 0.0048 |
| Forced expiratory volume in 1 second (FEV1)        | 28166213 | lung function  | -0.0659 | 0.0550 | -1.1982 | 2.31E-01 | European  | 0.2640 | 0.0171 | 0.9722 | 0.0077 | -0.0010  | 0.0058 |
| Total lipids in large VLDL                         | 27005778 | metabolites    | 0.0986  | 0.0827 | 1.1929  | 2.33E-01 | European  | 0.1455 | 0.0298 | 0.9829 | 0.0068 | 0.0018   | 0.0048 |
| Omega-9 and saturated fatty acids                  | 27005778 | metabolites    | 0.1564  | 0.1317 | 1.1879  | 2.35E-01 | European  | 0.0958 | 0.0447 | 0.9934 | 0.0083 | 0.0039   | 0.0048 |
| LDL cholesterol                                    | 20686565 | lipids         | 0.0661  | 0.0556 | 1.1876  | 2.35E-01 | European  | 0.1025 | 0.0295 | 1.0541 | 0.0513 | 0.0026   | 0.0054 |
| Triglycerides in large VLDL                        | 27005778 | metabolites    | 0.0987  | 0.0837 | 1.1802  | 2.38E-01 | European  | 0.1184 | 0.0287 | 0.9860 | 0.0069 | 0.0042   | 0.0050 |
| 22: 6 docosahexaenoic acid                         | 27005778 | metabolites    | -0.1128 | 0.0959 | -1.1757 | 2.40E-01 | European  | 0.1379 | 0.0382 | 0.9938 | 0.0079 | 0.0017   | 0.0050 |
| Phospholipids in small VLDL                        | 27005778 | metabolites    | 0.1028  | 0.0896 | 1.1475  | 2.51E-01 | European  | 0.1111 | 0.0353 | 1.0006 | 0.0088 | 0.0068   | 0.0047 |
| Phospholipids in very large VLDL                   | 27005778 | metabolites    | 0.0955  | 0.0834 | 1.1456  | 2.52E-01 | European  | 0.1143 | 0.0281 | 0.9822 | 0.0067 | 0.0026   | 0.0047 |
| Forced Vital capacity (FVC)                        | 26635082 | lung function  | -0.0768 | 0.0677 | -1.1345 | 2.57E-01 | European  | 0.1452 | 0.0157 | 0.9865 | 0.0070 | -0.0011  | 0.0053 |
| Hip circumference                                  | 25673412 | anthropometric | 0.0438  | 0.0388 | 1.1304  | 2.58E-01 | European  | 0.1272 | 0.0059 | 0.8609 | 0.0085 | 0.0042   | 0.0054 |
| Heart rate                                         | 23583979 | haematological | 0.0673  | 0.0596 | 1.1285  | 2.59E-01 | Mixed     | 0.0845 | 0.0098 | 1.0124 | 0.0091 | 0.0030   | 0.0052 |

| Trait                                                | PMID     | Category       | rg      | SE     | z       | p        | ethnicity | h2_obs | se     | h2_int | se     | gcov_int | se     |
|------------------------------------------------------|----------|----------------|---------|--------|---------|----------|-----------|--------|--------|--------|--------|----------|--------|
| Concentration of very large HDL particles            | 27005778 | metabolites    | -0.1513 | 0.1341 | -1.1280 | 2.59E-01 | European  | 0.0604 | 0.0262 | 1.0040 | 0.0165 | 0.0002   | 0.0048 |
| Mean diameter for VLDL particles                     | 27005778 | metabolites    | 0.0979  | 0.0875 | 1.1189  | 2.63E-01 | European  | 0.1369 | 0.0337 | 0.9893 | 0.0088 | 0.0001   | 0.0049 |
| Urinary albumin-to-creatinine ratio                  | 26631737 | kidney         | 0.0963  | 0.0860 | 1.1187  | 2.63E-01 | European  | 0.0463 | 0.0091 | 0.9954 | 0.0074 | -0.0003  | 0.0053 |
| Mono-unsaturated fatty acids                         | 27005778 | metabolites    | 0.1363  | 0.1219 | 1.1176  | 2.64E-01 | European  | 0.1136 | 0.0444 | 0.9856 | 0.0082 | 0.0052   | 0.0050 |
| Total Cholesterol                                    | 20686565 | lipids         | 0.0517  | 0.0472 | 1.0946  | 2.74E-01 | European  | 0.1339 | 0.0247 | 1.0216 | 0.0370 | 0.0047   | 0.0055 |
| Triglycerides in medium VLDL                         | 27005778 | metabolites    | 0.1004  | 0.0924 | 1.0861  | 2.77E-01 | European  | 0.1009 | 0.0296 | 0.9972 | 0.0068 | 0.0062   | 0.0050 |
| Forearm Bone mineral density                         | 26367794 | bone           | 0.1623  | 0.1497 | 1.0840  | 2.78E-01 | Mixed     | 0.0797 | 0.0440 | 1.0131 | 0.0071 | -0.0092  | 0.0048 |
| Phenylalanine                                        | 27005778 | metabolites    | 0.1470  | 0.1362 | 1.0795  | 2.80E-01 | European  | 0.0564 | 0.0226 | 1.0033 | 0.0072 | 0.0025   | 0.0051 |
| Acetate                                              | 27005778 | metabolites    | -0.1369 | 0.1269 | -1.0789 | 2.81E-01 | European  | 0.0514 | 0.0185 | 1.0035 | 0.0071 | 0.0068   | 0.0050 |
| Free cholesterol in medium VLDL                      | 27005778 | metabolites    | 0.0918  | 0.0854 | 1.0751  | 2.82E-01 | European  | 0.1155 | 0.0334 | 0.9939 | 0.0073 | 0.0061   | 0.0049 |
| Serum creatinine (non-diabetes)                      | 26831199 | kidney         | 0.0545  | 0.0508 | 1.0723  | 2.84E-01 | Mixed     | 0.1147 | 0.0111 | 0.9791 | 0.0146 | 0.0017   | 0.0063 |
| Triglycerides in small HDL                           | 27005778 | metabolites    | 0.1357  | 0.1275 | 1.0639  | 2.87E-01 | European  | 0.0639 | 0.0275 | 0.9998 | 0.0090 | 0.0085   | 0.0049 |
| Total lipids in medium VLDL                          | 27005778 | metabolites    | 0.0883  | 0.0835 | 1.0571  | 2.91E-01 | European  | 0.1445 | 0.0346 | 0.9841 | 0.0073 | 0.0049   | 0.0049 |
| Urate                                                | 23263486 | other          | 0.0481  | 0.0457 | 1.0534  | 2.92E-01 | European  | 0.1784 | 0.0611 | 0.9489 | 0.0545 | -0.0015  | 0.0057 |
| Phospholipids in large VLDL                          | 27005778 | metabolites    | 0.0904  | 0.0866 | 1.0447  | 2.96E-01 | European  | 0.1207 | 0.0313 | 0.9877 | 0.0069 | 0.0050   | 0.0049 |
| Rheumatoid Arthritis                                 | 24390342 | autoimmune     | 0.0521  | 0.0502 | 1.0368  | 3.00E-01 | European  | 0.1564 | 0.0301 | 1.0277 | 0.0183 | 0.0153   | 0.0050 |
| Cholesterol esters in large HDL                      | 27005778 | metabolites    | -0.1025 | 0.0999 | -1.0265 | 3.05E-01 | European  | 0.1211 | 0.0290 | 1.0016 | 0.0150 | -0.0011  | 0.0048 |
| Platelet count                                       | 22139419 | haematological | -0.0526 | 0.0516 | -1.0196 | 3.08E-01 | European  | 0.1196 | 0.0115 | 0.9857 | 0.0093 | 0.0089   | 0.0046 |
| HbA1C                                                | 20858683 | glycemic       | 0.0836  | 0.0822 | 1.0174  | 3.09E-01 | European  | 0.0639 | 0.0119 | 1.0004 | 0.0073 | -0.0057  | 0.0050 |
| Average number of double bonds in a fatty acid chain | 27005778 | metabolites    | -0.0922 | 0.0912 | -1.0108 | 3.12E-01 | European  | 0.1768 | 0.0528 | 0.9999 | 0.0083 | -0.0003  | 0.0050 |
| Concentration of small VLDL particles                | 27005778 | metabolites    | 0.0837  | 0.0829 | 1.0103  | 3.12E-01 | European  | 0.1512 | 0.0376 | 0.9897 | 0.0084 | 0.0069   | 0.0048 |
| Albumin                                              | 27005778 | metabolites    | 0.1320  | 0.1312 | 1.0065  | 3.14E-01 | European  | 0.0639 | 0.0256 | 0.9883 | 0.0072 | 0.0047   | 0.0048 |
| Serum creatinine                                     | 26831199 | kidney         | 0.0492  | 0.0497 | 0.9889  | 3.23E-01 | Mixed     | 0.1069 | 0.0097 | 0.9770 | 0.0149 | 0.0028   | 0.0064 |
| Triglycerides in very small VLDL                     | 27005778 | metabolites    | 0.0857  | 0.0870 | 0.9857  | 3.24E-01 | European  | 0.1380 | 0.0373 | 0.9981 | 0.0102 | 0.0089   | 0.0047 |
| Cholesterol esters in large VLDL                     | 27005778 | metabolites    | 0.0752  | 0.0769 | 0.9777  | 3.28E-01 | European  | 0.1710 | 0.0346 | 0.9751 | 0.0070 | 0.0024   | 0.0047 |
| Triglycerides in small VLDL                          | 27005778 | metabolites    | 0.0869  | 0.0889 | 0.9772  | 3.29E-01 | European  | 0.1219 | 0.0356 | 0.9931 | 0.0078 | 0.0089   | 0.0050 |
| Free cholesterol in small VLDL                       | 27005778 | metabolites    | 0.0914  | 0.0940 | 0.9729  | 3.31E-01 | European  | 0.1085 | 0.0336 | 1.0011 | 0.0087 | 0.0082   | 0.0049 |
| Total cholesterol in HDL                             | 27005778 | metabolites    | -0.1027 | 0.1056 | -0.9724 | 3.31E-01 | European  | 0.0965 | 0.0257 | 1.0053 | 0.0124 | 0.0016   | 0.0049 |

| Trait                                                                    | PMID     | Category          | rg      | SE     | z       | p        | ethnicity | h2_obs | se     | h2_int | se     | gcov_int | se     |
|--------------------------------------------------------------------------|----------|-------------------|---------|--------|---------|----------|-----------|--------|--------|--------|--------|----------|--------|
| Triglycerides in very large VLDL                                         | 27005778 | metabolites       | 0.0765  | 0.0790 | 0.9685  | 3.33E-01 | European  | 0.1310 | 0.0294 | 0.9760 | 0.0068 | 0.0040   | 0.0047 |
| Serum cystatin c                                                         | 26831199 | kidney            | -0.0639 | 0.0669 | -0.9546 | 3.40E-01 | Mixed     | 0.1699 | 0.0678 | 0.9612 | 0.0148 | -0.0005  | 0.0057 |
| Alanine                                                                  | 27005778 | metabolites       | 0.0934  | 0.0987 | 0.9465  | 3.44E-01 | European  | 0.0976 | 0.0275 | 1.0057 | 0.0074 | -0.0048  | 0.0052 |
| Isoleucine                                                               | 27005778 | metabolites       | 0.1163  | 0.1243 | 0.9360  | 3.49E-01 | European  | 0.0685 | 0.0240 | 0.9958 | 0.0072 | -0.0037  | 0.0055 |
| Total lipids in chylomicrons and largest VLDL particles                  | 27005778 | metabolites       | 0.0830  | 0.0887 | 0.9356  | 3.50E-01 | European  | 0.1323 | 0.0279 | 0.9852 | 0.0068 | 0.0005   | 0.0049 |
| Phospholipids in medium VLDL                                             | 27005778 | metabolites       | 0.0817  | 0.0878 | 0.9304  | 3.52E-01 | European  | 0.1132 | 0.0332 | 0.9958 | 0.0073 | 0.0079   | 0.0050 |
| Serum total triglycerides                                                | 27005778 | metabolites       | 0.0760  | 0.0819 | 0.9280  | 3.53E-01 | European  | 0.1296 | 0.0360 | 0.9899 | 0.0078 | 0.0094   | 0.0050 |
| Total lipids in small VLDL                                               | 27005778 | metabolites       | 0.0794  | 0.0856 | 0.9279  | 3.54E-01 | European  | 0.1444 | 0.0385 | 0.9917 | 0.0084 | 0.0065   | 0.0048 |
| Adiponectin                                                              | 22479202 | cardiometabolic   | 0.0741  | 0.0804 | 0.9216  | 3.57E-01 | Mixed     | 0.1224 | 0.0264 | 1.0212 | 0.0134 | -0.0077  | 0.0048 |
| Leucine                                                                  | 27005778 | metabolites       | 0.1336  | 0.1495 | 0.8933  | 3.72E-01 | European  | 0.0467 | 0.0215 | 1.0084 | 0.0070 | -0.0039  | 0.0053 |
| Total lipids in large HDL                                                | 27005778 | metabolites       | -0.0862 | 0.0966 | -0.8921 | 3.72E-01 | European  | 0.1295 | 0.0296 | 1.0010 | 0.0160 | -0.0004  | 0.0048 |
| Forced expiratory volume in 1 second (FEV1)/ Forced Vital capacity (FVC) | 21946350 | lung function     | -0.0572 | 0.0643 | -0.8892 | 3.74E-01 | European  | 0.1242 | 0.0137 | 0.9281 | 0.0081 | 0.0054   | 0.0053 |
| Total lipids in very large VLDL                                          | 27005778 | metabolites       | 0.0720  | 0.0810 | 0.8888  | 3.74E-01 | European  | 0.1491 | 0.0301 | 0.9735 | 0.0069 | 0.0024   | 0.0046 |
| Birth weight                                                             | 27680694 | anthropometric    | -0.0420 | 0.0473 | -0.8887 | 3.74E-01 | European  | 0.1007 | 0.0072 | 1.0459 | 0.0105 | 0.0007   | 0.0056 |
| Ferritin                                                                 | 25352340 | metal             | -0.0912 | 0.1043 | -0.8747 | 3.82E-01 | European  | 0.0923 | 0.0266 | 1.0272 | 0.0095 | 0.0066   | 0.0062 |
| Total cholesterol in medium LDL                                          | 27005778 | metabolites       | 0.1008  | 0.1160 | 0.8687  | 3.85E-01 | European  | 0.0670 | 0.0430 | 1.0138 | 0.0201 | 0.0028   | 0.0048 |
| Autism spectrum disorder                                                 | 0        | psychiatric       | 0.0808  | 0.0932 | 0.8666  | 3.86E-01 | European  | 0.3879 | 0.0534 | 0.9800 | 0.0074 | 0.0044   | 0.0055 |
| Age of smoking initiation                                                | 20418890 | smoking behaviour | -0.1115 | 0.1297 | -0.8594 | 3.90E-01 | European  | 0.0652 | 0.0186 | 0.9981 | 0.0062 | -0.0077  | 0.0051 |
| Ulcerative colitis                                                       | 26192919 | autoimmune        | -0.0533 | 0.0622 | -0.8580 | 3.91E-01 | European  | 0.2499 | 0.0336 | 1.0521 | 0.0112 | 0.0092   | 0.0055 |
| Total cholesterol in small VLDL                                          | 27005778 | metabolites       | 0.0905  | 0.1058 | 0.8556  | 3.92E-01 | European  | 0.0867 | 0.0324 | 1.0071 | 0.0098 | 0.0059   | 0.0048 |
| Eczema                                                                   | 26482879 | autoimmune        | -0.0775 | 0.0909 | -0.8531 | 3.94E-01 | Mixed     | 0.0674 | 0.0153 | 1.0240 | 0.0075 | 0.0184   | 0.0050 |
| Valine                                                                   | 27005778 | metabolites       | 0.1005  | 0.1194 | 0.8418  | 4.00E-01 | European  | 0.0651 | 0.0205 | 1.0128 | 0.0077 | -0.0041  | 0.0053 |
| Infant head circumference                                                | 22504419 | anthropometric    | -0.0798 | 0.0948 | -0.8411 | 4.00E-01 | European  | 0.2202 | 0.0439 | 0.9926 | 0.0069 | -0.0100  | 0.0047 |
| Fasting insulin main effect                                              | 22581228 | glycemic          | 0.0653  | 0.0790 | 0.8274  | 4.08E-01 | European  | 0.0702 | 0.0102 | 1.0152 | 0.0076 | 0.0022   | 0.0052 |
| Serum urate overweight                                                   | 25811787 | uric_acid         | 0.0616  | 0.0751 | 0.8206  | 4.12E-01 | European  | 0.5227 | 0.2251 | 0.9695 | 0.0210 | -0.0031  | 0.0049 |
| Cholesterol esters in medium HDL                                         | 27005778 | metabolites       | 0.1230  | 0.1501 | 0.8193  | 4.13E-01 | European  | 0.0544 | 0.0280 | 1.0004 | 0.0088 | -0.0036  | 0.0049 |
| Forced expiratory volume in 1 second (FEV1)                              | 21946350 | lung function     | -0.0641 | 0.0783 | -0.8179 | 4.13E-01 | European  | 0.1747 | 0.0226 | 0.8790 | 0.0125 | -0.0095  | 0.0089 |



| Trait                                                                    | PMID     | Category       | rg      | SE     | z       | p        | ethnicity | h2_obs | se     | h2_int | se     | gcov_int | se     |
|--------------------------------------------------------------------------|----------|----------------|---------|--------|---------|----------|-----------|--------|--------|--------|--------|----------|--------|
| Forced expiratory volume in 1 second (FEV1)/ Forced Vital capacity (FVC) | 26635082 | lung function  | -0.0584 | 0.0715 | -0.8175 | 4.14E-01 | European  | 0.1166 | 0.0150 | 0.9791 | 0.0068 | -0.0020  | 0.0051 |
| Concentration of medium LDL particles                                    | 27005778 | metabolites    | 0.0889  | 0.1088 | 0.8174  | 4.14E-01 | European  | 0.0775 | 0.0455 | 1.0125 | 0.0184 | 0.0053   | 0.0048 |
| 2hr glucose adjusted for BMI                                             | 20081857 | glycemic       | 0.0954  | 0.1171 | 0.8141  | 4.16E-01 | European  | 0.0986 | 0.0347 | 0.9948 | 0.0071 | -0.0041  | 0.0056 |
| Inflammatory Bowel Disease (Euro)                                        | 26192919 | autoimmune     | -0.0401 | 0.0495 | -0.8085 | 4.19E-01 | European  | 0.3300 | 0.0346 | 1.0565 | 0.0114 | 0.0112   | 0.0056 |
| Concentration of large HDL particles                                     | 27005778 | metabolites    | -0.0771 | 0.0957 | -0.8050 | 4.21E-01 | European  | 0.1321 | 0.0297 | 0.9996 | 0.0164 | 0.0000   | 0.0048 |
| Crohn's disease                                                          | 26192919 | autoimmune     | -0.0442 | 0.0549 | -0.8046 | 4.21E-01 | European  | 0.4944 | 0.0571 | 1.0263 | 0.0113 | 0.0133   | 0.0053 |
| Concentration of medium HDL particles                                    | 27005778 | metabolites    | 0.1007  | 0.1252 | 0.8042  | 4.21E-01 | European  | 0.0672 | 0.0253 | 0.9937 | 0.0078 | 0.0017   | 0.0047 |
| Lumbar spine bone mineral density                                        | 22504420 | bone           | 0.0438  | 0.0548 | 0.8005  | 4.23E-01 | Mixed     | 0.2669 | 0.0257 | 1.0154 | 0.0093 | -0.0061  | 0.0050 |
| Mean diameter for LDL particles                                          | 27005778 | metabolites    | -0.1000 | 0.1257 | -0.7953 | 4.27E-01 | European  | 0.0543 | 0.0252 | 0.9977 | 0.0120 | -0.0008  | 0.0046 |
| Total lipids in medium HDL                                               | 27005778 | metabolites    | 0.1033  | 0.1329 | 0.7777  | 4.37E-01 | European  | 0.0626 | 0.0255 | 0.9955 | 0.0081 | 0.0005   | 0.0048 |
| Apolipoprotein A-I                                                       | 27005778 | metabolites    | -0.0928 | 0.1209 | -0.7675 | 4.43E-01 | European  | 0.0803 | 0.0269 | 1.0026 | 0.0110 | 0.0074   | 0.0049 |
| Height; Females at age 10 and males at age 12                            | 23449627 | anthropometric | -0.0438 | 0.0576 | -0.7607 | 4.47E-01 | European  | 0.4241 | 0.0473 | 0.9545 | 0.0080 | 0.0015   | 0.0053 |
| Phospholipids in large LDL                                               | 27005778 | metabolites    | 0.0922  | 0.1229 | 0.7504  | 4.53E-01 | European  | 0.0580 | 0.0410 | 1.0195 | 0.0196 | 0.0056   | 0.0047 |
| Free cholesterol in large VLDL                                           | 27005778 | metabolites    | 0.0585  | 0.0781 | 0.7492  | 4.54E-01 | European  | 0.1317 | 0.0299 | 0.9850 | 0.0068 | 0.0046   | 0.0048 |
| Alzheimer's disease                                                      | 24162737 | neurological   | -0.0737 | 0.0988 | -0.7467 | 4.55E-01 | European  | 0.0406 | 0.0234 | 1.0707 | 0.0332 | 0.0083   | 0.0051 |
| Triglycerides in IDL                                                     | 27005778 | metabolites    | 0.0739  | 0.0989 | 0.7468  | 4.55E-01 | European  | 0.1035 | 0.0345 | 1.0116 | 0.0156 | 0.0092   | 0.0045 |
| Concentration of chylomicrons and largest VLDL particles                 | 27005778 | metabolites    | 0.0692  | 0.0936 | 0.7393  | 4.60E-01 | European  | 0.1217 | 0.0281 | 0.9863 | 0.0071 | 0.0051   | 0.0048 |
| Total cholesterol in medium VLDL                                         | 27005778 | metabolites    | 0.0617  | 0.0842 | 0.7324  | 4.64E-01 | European  | 0.1258 | 0.0354 | 0.9917 | 0.0081 | 0.0068   | 0.0049 |
| Total lipids in small LDL                                                | 27005778 | metabolites    | 0.0732  | 0.1007 | 0.7264  | 4.68E-01 | European  | 0.0854 | 0.0423 | 1.0086 | 0.0158 | 0.0064   | 0.0048 |
| Triglycerides in chylomicrons and largest VLDL particles                 | 27005778 | metabolites    | 0.0643  | 0.0907 | 0.7089  | 4.78E-01 | European  | 0.1017 | 0.0274 | 0.9860 | 0.0071 | 0.0064   | 0.0049 |
| Total lipids in medium LDL                                               | 27005778 | metabolites    | 0.0750  | 0.1072 | 0.6998  | 4.84E-01 | European  | 0.0789 | 0.0462 | 1.0109 | 0.0189 | 0.0056   | 0.0048 |
| Transferrin                                                              | 25352340 | metal          | 0.0545  | 0.0798 | 0.6836  | 4.94E-01 | European  | 0.1635 | 0.0759 | 1.0614 | 0.0243 | -0.0059  | 0.0063 |
| Phospholipids in large HDL                                               | 27005778 | metabolites    | -0.0657 | 0.0964 | -0.6813 | 4.96E-01 | European  | 0.1282 | 0.0300 | 0.9978 | 0.0152 | -0.0003  | 0.0049 |

| Trait                                                          | PMID     | Category       | rg      | SE     | z       | p        | ethnicity | h2_obs | se     | h2_int | se     | gcov_int | se     |
|----------------------------------------------------------------|----------|----------------|---------|--------|---------|----------|-----------|--------|--------|--------|--------|----------|--------|
| Concentration of small LDL particles                           | 27005778 | metabolites    | 0.0661  | 0.0972 | 0.6798  | 4.97E-01 | European  | 0.0937 | 0.0412 | 1.0072 | 0.0145 | 0.0072   | 0.0048 |
| Total cholesterol in LDL                                       | 27005778 | metabolites    | 0.0790  | 0.1166 | 0.6771  | 4.98E-01 | European  | 0.0663 | 0.0464 | 1.0148 | 0.0215 | 0.0045   | 0.0049 |
| Femoral neck bone mineral density                              | 22504420 | bone           | 0.0336  | 0.0500 | 0.6733  | 5.01E-01 | Mixed     | 0.3037 | 0.0255 | 0.9800 | 0.0085 | -0.0003  | 0.0052 |
| Difference in height between childhood and adulthood; age 8    | 23449627 | anthropometric | -0.0617 | 0.0929 | -0.6644 | 5.06E-01 | European  | 0.3377 | 0.0501 | 0.9712 | 0.0077 | -0.0059  | 0.0064 |
| Fasting proinsulin                                             | 20081858 | glycemic       | 0.0625  | 0.0965 | 0.6478  | 5.17E-01 | European  | 0.2013 | 0.0898 | 0.9783 | 0.0105 | -0.0035  | 0.0053 |
| Concentration of large LDL particles                           | 27005778 | metabolites    | 0.0722  | 0.1145 | 0.6309  | 5.28E-01 | European  | 0.0719 | 0.0467 | 1.0173 | 0.0196 | 0.0053   | 0.0047 |
| Cholesterol esters in medium LDL                               | 27005778 | metabolites    | 0.0684  | 0.1091 | 0.6270  | 5.31E-01 | European  | 0.0779 | 0.0464 | 1.0111 | 0.0192 | 0.0052   | 0.0048 |
| Omega-3 fatty acids                                            | 27005778 | metabolites    | -0.0609 | 0.1004 | -0.6061 | 5.44E-01 | European  | 0.1519 | 0.0435 | 0.9920 | 0.0081 | -0.0002  | 0.0054 |
| Parkinson's disease                                            | 19915575 | neurological   | -0.0403 | 0.0667 | -0.6040 | 5.46E-01 | European  | 0.3707 | 0.1211 | 1.1278 | 0.0093 | 0.0030   | 0.0044 |
| Phospholipids in very small VLDL                               | 27005778 | metabolites    | 0.0653  | 0.1092 | 0.5985  | 5.50E-01 | European  | 0.0814 | 0.0376 | 1.0159 | 0.0157 | 0.0051   | 0.0045 |
| Total lipids in large LDL                                      | 27005778 | metabolites    | 0.0677  | 0.1147 | 0.5904  | 5.55E-01 | European  | 0.0716 | 0.0479 | 1.0159 | 0.0202 | 0.0049   | 0.0047 |
| 18: 2 linoleic acid (LA)                                       | 27005778 | metabolites    | -0.0555 | 0.0965 | -0.5749 | 5.65E-01 | European  | 0.1293 | 0.0501 | 1.0026 | 0.0098 | 0.0088   | 0.0048 |
| Cholesterol esters in large LDL                                | 27005778 | metabolites    | 0.0647  | 0.1143 | 0.5659  | 5.71E-01 | European  | 0.0733 | 0.0478 | 1.0135 | 0.0202 | 0.0043   | 0.0048 |
| Free cholesterol                                               | 27005778 | metabolites    | -0.0783 | 0.1387 | -0.5644 | 5.73E-01 | European  | 0.0714 | 0.0417 | 1.0225 | 0.0109 | 0.0083   | 0.0049 |
| Total cholesterol in large LDL                                 | 27005778 | metabolites    | 0.0665  | 0.1188 | 0.5598  | 5.76E-01 | European  | 0.0614 | 0.0432 | 1.0167 | 0.0208 | 0.0050   | 0.0049 |
| Concentration of very small VLDL particles                     | 27005778 | metabolites    | 0.0529  | 0.0946 | 0.5585  | 5.77E-01 | European  | 0.1130 | 0.0366 | 1.0060 | 0.0127 | 0.0082   | 0.0044 |
| Apolipoprotein B                                               | 27005778 | metabolites    | 0.0560  | 0.1023 | 0.5469  | 5.85E-01 | European  | 0.0855 | 0.0387 | 1.0074 | 0.0140 | 0.0085   | 0.0049 |
| Glutamine                                                      | 27005778 | metabolites    | -0.0581 | 0.1086 | -0.5344 | 5.93E-01 | European  | 0.0639 | 0.0216 | 1.0174 | 0.0080 | -0.0037  | 0.0046 |
| Difference in height between adolescence and adulthood; age 14 | 23449627 | anthropometric | -0.0570 | 0.1142 | -0.4992 | 6.18E-01 | European  | 0.4419 | 0.1066 | 0.9819 | 0.0070 | 0.0000   | 0.0052 |
| Concentration of IDL particles                                 | 27005778 | metabolites    | 0.0568  | 0.1161 | 0.4891  | 6.25E-01 | European  | 0.0718 | 0.0405 | 1.0193 | 0.0170 | 0.0057   | 0.0046 |
| Chronotype                                                     | 27494321 | sleeping       | -0.0242 | 0.0499 | -0.4854 | 6.27E-01 | European  | 0.0992 | 0.0062 | 1.0196 | 0.0089 | -0.0009  | 0.0053 |
| Lumbar Spine bone mineral density                              | 26367794 | bone           | 0.0296  | 0.0621 | 0.4765  | 6.34E-01 | Mixed     | 0.1277 | 0.0163 | 0.9804 | 0.0086 | -0.0049  | 0.0051 |
| Phospholipids in IDL                                           | 27005778 | metabolites    | 0.0589  | 0.1275 | 0.4621  | 6.44E-01 | European  | 0.0567 | 0.0389 | 1.0228 | 0.0180 | 0.0070   | 0.0047 |
| Cholesterol esters in medium VLDL                              | 27005778 | metabolites    | 0.0372  | 0.0863 | 0.4306  | 6.67E-01 | European  | 0.1540 | 0.0377 | 0.9851 | 0.0084 | 0.0063   | 0.0049 |
| Fasting glucose main effect                                    | 22581228 | glycemic       | 0.0286  | 0.0682 | 0.4195  | 6.75E-01 | European  | 0.0978 | 0.0192 | 0.9990 | 0.0102 | 0.0035   | 0.0051 |
| Total lipids in IDL                                            | 27005778 | metabolites    | 0.0443  | 0.1172 | 0.3785  | 7.05E-01 | European  | 0.0703 | 0.0421 | 1.0202 | 0.0177 | 0.0054   | 0.0046 |

| Trait                                                                   | PMID     | Category       | rg      | SE     | z       | p        | ethnicity | h2_obs | se     | h2_int | se     | gcov_int | se     |
|-------------------------------------------------------------------------|----------|----------------|---------|--------|---------|----------|-----------|--------|--------|--------|--------|----------|--------|
| Type 2 Diabetes                                                         | 22885922 | glycemic       | 0.0225  | 0.0623 | 0.3619  | 7.17E-01 | European  | 0.0884 | 0.0097 | 1.0076 | 0.0078 | 0.0172   | 0.0052 |
| Total lipids in very small VLDL                                         | 27005778 | metabolites    | 0.0355  | 0.0981 | 0.3618  | 7.18E-01 | European  | 0.1037 | 0.0363 | 1.0104 | 0.0130 | 0.0072   | 0.0044 |
| Femoral Neck bone mineral density                                       | 26367794 | bone           | -0.0241 | 0.0678 | -0.3562 | 7.22E-01 | Mixed     | 0.1242 | 0.0150 | 0.9773 | 0.0083 | -0.0008  | 0.0056 |
| Serum total cholesterol                                                 | 27005778 | metabolites    | 0.0431  | 0.1218 | 0.3540  | 7.23E-01 | European  | 0.0622 | 0.0373 | 1.0230 | 0.0143 | 0.0071   | 0.0051 |
| HOMA-B                                                                  | 20081858 | glycemic       | -0.0338 | 0.0977 | -0.3462 | 7.29E-01 | European  | 0.0868 | 0.0139 | 0.9919 | 0.0068 | 0.0053   | 0.0055 |
| Chronic Kidney Disease                                                  | 26831199 | kidney         | -0.0353 | 0.1059 | -0.3338 | 7.39E-01 | Mixed     | 0.0185 | 0.0057 | 1.0157 | 0.0097 | 0.0151   | 0.0059 |
| Free cholesterol in large LDL                                           | 27005778 | metabolites    | 0.0393  | 0.1180 | 0.3332  | 7.39E-01 | European  | 0.0598 | 0.0445 | 1.0190 | 0.0216 | 0.0052   | 0.0049 |
| Triglycerides in very large HDL                                         | 27005778 | metabolites    | -0.0383 | 0.1192 | -0.3216 | 7.48E-01 | European  | 0.0807 | 0.0272 | 1.0163 | 0.0302 | 0.0074   | 0.0048 |
| HOMA-IR                                                                 | 20081858 | glycemic       | 0.0297  | 0.1005 | 0.2956  | 7.68E-01 | European  | 0.0690 | 0.0125 | 1.0027 | 0.0067 | 0.0073   | 0.0052 |
| Primary biliary cirrhosis                                               | 26394269 | autoimmune     | -0.0197 | 0.0767 | -0.2561 | 7.98E-01 | European  | 0.3794 | 0.0647 | 1.0030 | 0.0100 | 0.0158   | 0.0061 |
| Total cholesterol in large VLDL                                         | 27005778 | metabolites    | 0.0206  | 0.0808 | 0.2554  | 7.98E-01 | European  | 0.1253 | 0.0289 | 0.9879 | 0.0066 | 0.0055   | 0.0047 |
| Total cholesterol in IDL                                                | 27005778 | metabolites    | 0.0289  | 0.1198 | 0.2412  | 8.09E-01 | European  | 0.0678 | 0.0440 | 1.0200 | 0.0187 | 0.0045   | 0.0048 |
| Sitting height ratio                                                    | 25865494 | anthropometric | -0.0152 | 0.0732 | -0.2081 | 8.35E-01 | European  | 0.2254 | 0.0280 | 0.9784 | 0.0075 | 0.0002   | 0.0060 |
| Free cholesterol in IDL                                                 | 27005778 | metabolites    | 0.0226  | 0.1165 | 0.1938  | 8.46E-01 | European  | 0.0673 | 0.0384 | 1.0215 | 0.0183 | 0.0061   | 0.0048 |
| Free cholesterol in medium HDL                                          | 27005778 | metabolites    | 0.0226  | 0.1226 | 0.1845  | 8.54E-01 | European  | 0.0692 | 0.0233 | 0.9966 | 0.0084 | 0.0024   | 0.0048 |
| Total cholesterol in medium HDL                                         | 27005778 | metabolites    | 0.0256  | 0.1391 | 0.1843  | 8.54E-01 | European  | 0.0553 | 0.0252 | 0.9984 | 0.0091 | 0.0002   | 0.0048 |
| Leptin_adjBMI                                                           | 26833098 | hormone        | -0.0143 | 0.0915 | -0.1563 | 8.76E-01 | European  | 0.0928 | 0.0182 | 1.0049 | 0.0075 | -0.0004  | 0.0056 |
| Systemic lupus erythematosus                                            | 26502338 | autoimmune     | 0.0083  | 0.0942 | 0.0879  | 9.30E-01 | European  | 0.3904 | 0.0682 | 1.1060 | 0.0106 | 0.0054   | 0.0069 |
| Phospholipids in medium HDL                                             | 27005778 | metabolites    | 0.0102  | 0.1167 | 0.0872  | 9.31E-01 | European  | 0.0702 | 0.0229 | 0.9936 | 0.0081 | 0.0048   | 0.0046 |
| Celiac disease                                                          | 20190752 | autoimmune     | 0.0053  | 0.0727 | 0.0728  | 9.42E-01 | European  | 0.2913 | 0.0512 | 1.0706 | 0.0115 | 0.0028   | 0.0067 |
| Creatinine                                                              | 27005778 | metabolites    | -0.0039 | 0.0842 | -0.0461 | 9.63E-01 | European  | 0.1122 | 0.0258 | 1.0134 | 0.0080 | -0.0055  | 0.0047 |
| Total cholesterol in small LDL                                          | 27005778 | metabolites    | 0.0047  | 0.1054 | 0.0449  | 9.64E-01 | European  | 0.0690 | 0.0417 | 1.0166 | 0.0174 | 0.0076   | 0.0048 |
| Forced expiratory volume in 1 second (FEV1)/Forced Vital capacity (FVC) | 28166213 | lung function  | -0.0019 | 0.0566 | -0.0337 | 9.73E-01 | European  | 0.2576 | 0.0210 | 0.9741 | 0.0096 | -0.0095  | 0.0058 |
| Free cholesterol to esterified cholesterol ratio                        | 27005778 | metabolites    | 0.0044  | 0.1358 | 0.0321  | 9.74E-01 | European  | 0.0627 | 0.0499 | 1.0121 | 0.0115 | 0.0048   | 0.0045 |
| Child birth length                                                      | 25281659 | anthropometric | 0.0009  | 0.0812 | 0.0105  | 9.92E-01 | European  | 0.1640 | 0.0235 | 0.9952 | 0.0072 | -0.0064  | 0.0059 |

**eTable 5.** Genetic correlations for “naïve” Design (UKBB traits)

All results from LDhub analyses. Trait= trait against which genetic correlation was calculated. ethnicity= sample ethnicity for sample referenced in “Trait” column. rG= genetic correlation. SE= standard error for genetic correlation. z= Z-score. p= P-value for genetic correlation analysis. h2\_obs= Heritability on the observed scale for sample referenced in “Trait”. se= standard errors for variable reported in the cell to the left (i.e. h2\_obs, ht\_int, gcov\_int). h2\_int= LD score intercept for sample referenced in “Trait”. gcov\_int= cross-trait LD Score regression intercept.

| Trait                                                                       | ethnicity | rg      | SE     | z        | p        | h2_obs | se     | h2_int | se     | gcov_int | se     |
|-----------------------------------------------------------------------------|-----------|---------|--------|----------|----------|--------|--------|--------|--------|----------|--------|
| Overall health rating                                                       | European  | 0.5715  | 0.0392 | 14.5879  | 3.35E-48 | 0.0999 | 0.0032 | 1.0615 | 0.0111 | 0.0019   | 0.0068 |
| Seen a psychiatrist for nerves anxiety tension or depression                | European  | 0.7916  | 0.0580 | 13.6518  | 1.97E-42 | 0.0304 | 0.0021 | 1.0094 | 0.0084 | 0.0005   | 0.0060 |
| Seen doctor (GP) for nerves anxiety tension or depression                   | European  | 0.6983  | 0.0520 | 13.4382  | 3.61E-41 | 0.0612 | 0.0029 | 1.0149 | 0.0102 | 0.0056   | 0.0070 |
| Age at first live birth                                                     | European  | -0.6181 | 0.0461 | -13.3952 | 6.45E-41 | 0.1651 | 0.0076 | 1.0496 | 0.0097 | -0.0034  | 0.0065 |
| Frequency of tiredness / lethargy in last 2 weeks                           | European  | 0.6130  | 0.0464 | 13.2153  | 7.16E-40 | 0.0589 | 0.0030 | 1.0313 | 0.0097 | 0.0017   | 0.0063 |
| Long-standing illness disability or infirmity                               | European  | 0.5350  | 0.0422 | 12.6743  | 8.20E-37 | 0.0500 | 0.0025 | 1.0275 | 0.0089 | 0.0058   | 0.0060 |
| Frequency of tenseness / restlessness in last 2 weeks                       | European  | 0.6587  | 0.0553 | 11.9084  | 1.07E-32 | 0.0433 | 0.0028 | 1.0174 | 0.0094 | 0.0005   | 0.0058 |
| Illness injury bereavement stress in last 2 years: Financial difficulties   | European  | 0.6168  | 0.0523 | 11.7992  | 3.94E-32 | 0.0328 | 0.0023 | 1.0310 | 0.0082 | -0.0058  | 0.0059 |
| Number of treatments/medications taken                                      | European  | 0.4648  | 0.0394 | 11.7937  | 4.21E-32 | 0.0606 | 0.0026 | 1.0320 | 0.0095 | 0.0037   | 0.0060 |
| Age completed full time education                                           | European  | -0.4965 | 0.0424 | -11.6968 | 1.32E-31 | 0.0847 | 0.0045 | 1.0625 | 0.0098 | 0.0011   | 0.0064 |
| Taking other prescription medications                                       | European  | 0.4961  | 0.0433 | 11.4565  | 2.18E-30 | 0.0432 | 0.0024 | 1.0174 | 0.0088 | 0.0099   | 0.0058 |
| Number of self-reported non-cancer illnesses                                | European  | 0.4360  | 0.0383 | 11.3765  | 5.48E-30 | 0.0614 | 0.0027 | 1.0262 | 0.0102 | 0.0053   | 0.0059 |
| Pain type(s) experienced in last month: None of the above                   | European  | -0.4899 | 0.0433 | -11.3075 | 1.20E-29 | 0.0553 | 0.0027 | 1.0362 | 0.0086 | -0.0081  | 0.0060 |
| Chest pain or discomfort                                                    | European  | 0.5969  | 0.0541 | 11.0281  | 2.80E-28 | 0.0328 | 0.0022 | 1.0193 | 0.0078 | 0.0000   | 0.0058 |
| Current tobacco smoking                                                     | European  | 0.5113  | 0.0475 | 10.7731  | 4.61E-27 | 0.0554 | 0.0029 | 1.0122 | 0.0097 | -0.0041  | 0.0063 |
| Past tobacco smoking                                                        | European  | -0.4469 | 0.0423 | -10.5697 | 4.12E-26 | 0.0902 | 0.0041 | 1.0266 | 0.0109 | 0.0086   | 0.0065 |
| Health satisfaction                                                         | European  | 0.5549  | 0.0525 | 10.5659  | 4.29E-26 | 0.0822 | 0.0055 | 1.0079 | 0.0076 | 0.0016   | 0.0059 |
| Smoking status: Current                                                     | European  | 0.5110  | 0.0490 | 10.4376  | 1.67E-25 | 0.0521 | 0.0029 | 1.0129 | 0.0096 | -0.0057  | 0.0062 |
| Frequency of unenthusiasm / disinterest in last 2 weeks                     | European  | 0.6407  | 0.0615 | 10.4157  | 2.10E-25 | 0.0388 | 0.0029 | 1.0180 | 0.0100 | 0.0024   | 0.0062 |
| Frequency of depressed mood in last 2 weeks                                 | European  | 0.6726  | 0.0649 | 10.3626  | 3.67E-25 | 0.0419 | 0.0029 | 1.0148 | 0.0088 | 0.0015   | 0.0060 |
| Current employment status: Unable to work because of sickness or disability | European  | 0.7187  | 0.0694 | 10.3485  | 4.25E-25 | 0.0243 | 0.0018 | 1.0194 | 0.0073 | 0.0037   | 0.0055 |
| Pain type(s) experienced in last month: Neck or shoulder pain               | European  | 0.4975  | 0.0483 | 10.3039  | 6.77E-25 | 0.0325 | 0.0020 | 1.0282 | 0.0085 | 0.0020   | 0.0054 |
| Loneliness isolation                                                        | European  | 0.5385  | 0.0527 | 10.2277  | 1.49E-24 | 0.0373 | 0.0024 | 1.0271 | 0.0080 | 0.0049   | 0.0060 |
| Ever unenthusiastic/disinterested for a whole week                          | European  | 0.6452  | 0.0633 | 10.1991  | 2.00E-24 | 0.0573 | 0.0064 | 1.0009 | 0.0080 | 0.0012   | 0.0048 |

| Trait                                                                                  | ethnicity | rg      | SE     | z       | p        | h2_obs | se     | h2_int | se     | gcov_int | se     |
|----------------------------------------------------------------------------------------|-----------|---------|--------|---------|----------|--------|--------|--------|--------|----------|--------|
| Townsend deprivation index at recruitment                                              | European  | 0.5677  | 0.0564 | 10.0671 | 7.72E-24 | 0.0338 | 0.0020 | 1.0345 | 0.0077 | 0.0055   | 0.0057 |
| Falls in the last year                                                                 | European  | 0.5215  | 0.0522 | 9.9853  | 1.77E-23 | 0.0328 | 0.0020 | 1.0027 | 0.0079 | -0.0057  | 0.0054 |
| Pack years adult smoking as proportion of life span exposed to smoking<br>PREVIEW ONLY | European  | 0.4832  | 0.0484 | 9.9774  | 1.91E-23 | 0.1278 | 0.0111 | 1.0139 | 0.0101 | -0.0001  | 0.0057 |
| Qualifications: A levels/AS levels or equivalent                                       | European  | -0.4043 | 0.0408 | -9.9125 | 3.67E-23 | 0.0958 | 0.0035 | 1.0583 | 0.0114 | 0.0056   | 0.0070 |
| Mood swings                                                                            | European  | 0.5431  | 0.0550 | 9.8773  | 5.22E-23 | 0.0707 | 0.0035 | 1.0196 | 0.0107 | 0.0062   | 0.0062 |
| Medication for pain relief constipation heartburn: None of the above                   | European  | -0.4160 | 0.0426 | -9.7642 | 1.60E-22 | 0.0538 | 0.0027 | 1.0326 | 0.0097 | -0.0091  | 0.0051 |
| Qualifications: College or University degree                                           | European  | -0.3350 | 0.0345 | -9.7012 | 2.98E-22 | 0.1675 | 0.0055 | 1.1217 | 0.0149 | -0.0081  | 0.0075 |
| Illness injury bereavement stress in last 2 years: None of the above                   | European  | -0.5655 | 0.0586 | -9.6538 | 4.74E-22 | 0.0233 | 0.0017 | 1.0110 | 0.0067 | 0.0016   | 0.0052 |
| Usual walking pace                                                                     | European  | -0.4013 | 0.0417 | -9.6140 | 6.98E-22 | 0.0761 | 0.0030 | 1.0392 | 0.0108 | 0.0095   | 0.0061 |
| Ever smoked                                                                            | European  | 0.4089  | 0.0428 | 9.5485  | 1.32E-21 | 0.0744 | 0.0034 | 1.0271 | 0.0108 | -0.0133  | 0.0062 |
| Age at last live birth                                                                 | European  | -0.5299 | 0.0556 | -9.5258 | 1.64E-21 | 0.0863 | 0.0062 | 1.0220 | 0.0093 | -0.0034  | 0.0060 |
| Pack years of smoking PREVIEW ONLY                                                     | European  | 0.4737  | 0.0501 | 9.4459  | 3.52E-21 | 0.1102 | 0.0100 | 1.0145 | 0.0097 | -0.0009  | 0.0054 |
| Qualifications: None of the above                                                      | European  | 0.3793  | 0.0405 | 9.3542  | 8.42E-21 | 0.0975 | 0.0039 | 1.0676 | 0.0117 | 0.0009   | 0.0071 |
| Number of operations self-reported                                                     | European  | 0.4473  | 0.0479 | 9.3297  | 1.06E-20 | 0.0379 | 0.0023 | 1.0387 | 0.0080 | -0.0003  | 0.0059 |
| Age started oral contraceptive pill                                                    | European  | -0.6132 | 0.0662 | -9.2591 | 2.06E-20 | 0.0472 | 0.0044 | 1.0191 | 0.0079 | 0.0041   | 0.0056 |
| Maternal smoking around birth                                                          | European  | 0.4367  | 0.0496 | 8.8033  | 1.33E-18 | 0.0495 | 0.0029 | 1.0377 | 0.0094 | 0.0045   | 0.0060 |
| Types of physical activity in last 4 weeks: None of the above                          | European  | 0.5568  | 0.0636 | 8.7597  | 1.96E-18 | 0.0237 | 0.0018 | 1.0195 | 0.0077 | 0.0013   | 0.0055 |
| Exposure to tobacco smoke outside home                                                 | European  | 0.4787  | 0.0558 | 8.5827  | 9.27E-18 | 0.0319 | 0.0025 | 1.0189 | 0.0087 | -0.0087  | 0.0056 |
| Shortness of breath walking on level ground                                            | European  | 0.6408  | 0.0749 | 8.5590  | 1.14E-17 | 0.0488 | 0.0052 | 1.0084 | 0.0069 | -0.0058  | 0.0053 |
| Non-cancer illness code self-reported: depression                                      | European  | 0.6649  | 0.0779 | 8.5318  | 1.44E-17 | 0.0179 | 0.0018 | 1.0046 | 0.0076 | 0.0046   | 0.0061 |
| Diagnoses - main ICD10: R07 Pain in throat and chest                                   | European  | 0.5837  | 0.0688 | 8.4845  | 2.17E-17 | 0.0162 | 0.0018 | 1.0061 | 0.0076 | 0.0024   | 0.0052 |
| Smoking status: Previous                                                               | European  | 0.3861  | 0.0458 | 8.4259  | 3.58E-17 | 0.0515 | 0.0030 | 1.0229 | 0.0100 | -0.0041  | 0.0060 |
| Other serious medical condition/disability diagnosed by doctor                         | European  | 0.4795  | 0.0573 | 8.3671  | 5.91E-17 | 0.0257 | 0.0018 | 1.0095 | 0.0073 | 0.0000   | 0.0052 |
| Pain type(s) experienced in last month: Back pain                                      | European  | 0.4119  | 0.0495 | 8.3282  | 8.21E-17 | 0.0395 | 0.0024 | 1.0233 | 0.0090 | 0.0056   | 0.0058 |
| Medication for pain relief constipation heartburn: Omeprazole (e.g. Zanprol)           | European  | 0.5101  | 0.0617 | 8.2696  | 1.34E-16 | 0.0180 | 0.0016 | 1.0208 | 0.0073 | 0.0001   | 0.0051 |
| Ever depressed for a whole week                                                        | European  | 0.5449  | 0.0666 | 8.1789  | 2.86E-16 | 0.0627 | 0.0057 | 0.9947 | 0.0077 | -0.0011  | 0.0054 |
| Wheeze or whistling in the chest in last year                                          | European  | 0.3793  | 0.0466 | 8.1472  | 3.73E-16 | 0.0599 | 0.0032 | 1.0325 | 0.0109 | 0.0142   | 0.0064 |
| Miserableness                                                                          | European  | 0.5184  | 0.0639 | 8.1155  | 4.84E-16 | 0.0640 | 0.0038 | 1.0199 | 0.0114 | 0.0086   | 0.0068 |
| Leg pain on walking                                                                    | European  | 0.5111  | 0.0631 | 8.0976  | 5.61E-16 | 0.0578 | 0.0055 | 1.0080 | 0.0078 | 0.0027   | 0.0055 |
| Fed-up feelings                                                                        | European  | 0.4566  | 0.0565 | 8.0768  | 6.65E-16 | 0.0719 | 0.0034 | 1.0247 | 0.0104 | 0.0102   | 0.0072 |
| Job involves heavy manual or physical work                                             | European  | 0.3786  | 0.0473 | 8.0015  | 1.23E-15 | 0.0861 | 0.0046 | 1.0394 | 0.0094 | 0.0001   | 0.0059 |
| Mouth/teeth dental problems: None of the above                                         | European  | -0.4354 | 0.0546 | -7.9709 | 1.58E-15 | 0.0379 | 0.0021 | 1.0158 | 0.0083 | 0.0078   | 0.0061 |
| Ever used hormone-replacement therapy (HRT)                                            | European  | 0.4301  | 0.0541 | 7.9575  | 1.75E-15 | 0.0408 | 0.0033 | 0.9993 | 0.0075 | 0.0049   | 0.0051 |

| Trait                                                                                                                | ethnicity | rg      | SE     | z       | p        | h2_obs | se     | h2_int | se     | gcov_int | se     |
|----------------------------------------------------------------------------------------------------------------------|-----------|---------|--------|---------|----------|--------|--------|--------|--------|----------|--------|
| Ever highly irritable/argumentative for 2 days                                                                       | European  | 0.5353  | 0.0688 | 7.7865  | 6.89E-15 | 0.0526 | 0.0056 | 0.9970 | 0.0075 | 0.0065   | 0.0051 |
| Leg fat percentage (right)                                                                                           | European  | 0.2692  | 0.0347 | 7.7677  | 7.99E-15 | 0.2082 | 0.0065 | 1.0815 | 0.0173 | 0.0065   | 0.0078 |
| Medication for pain relief constipation heartburn: Paracetamol                                                       | European  | 0.3840  | 0.0498 | 7.7051  | 1.31E-14 | 0.0428 | 0.0025 | 1.0281 | 0.0086 | 0.0023   | 0.0052 |
| Pain type(s) experienced in last month: Hip pain                                                                     | European  | 0.4450  | 0.0579 | 7.6881  | 1.49E-14 | 0.0235 | 0.0020 | 1.0194 | 0.0077 | -0.0073  | 0.0054 |
| Leg fat percentage (left)                                                                                            | European  | 0.2693  | 0.0351 | 7.6781  | 1.62E-14 | 0.2078 | 0.0066 | 1.0864 | 0.0175 | 0.0059   | 0.0078 |
| Pain type(s) experienced in last month: Knee pain                                                                    | European  | 0.3970  | 0.0518 | 7.6587  | 1.88E-14 | 0.0406 | 0.0024 | 1.0152 | 0.0088 | -0.0037  | 0.0064 |
| Types of physical activity in last 4 weeks: Other exercises (eg: swimming cycling keep fit bowling)                  | European  | -0.3704 | 0.0489 | -7.5795 | 3.47E-14 | 0.0470 | 0.0022 | 1.0108 | 0.0088 | -0.0050  | 0.0058 |
| Alcohol usually taken with meals                                                                                     | European  | -0.3745 | 0.0503 | -7.4434 | 9.81E-14 | 0.1085 | 0.0051 | 1.0643 | 0.0097 | -0.0072  | 0.0066 |
| Mouth/teeth dental problems: Dentures                                                                                | European  | 0.3685  | 0.0497 | 7.4128  | 1.24E-13 | 0.0482 | 0.0028 | 1.0355 | 0.0101 | -0.0056  | 0.0059 |
| Tense / highly strung                                                                                                | European  | 0.5015  | 0.0679 | 7.3861  | 1.51E-13 | 0.0571 | 0.0034 | 0.9962 | 0.0108 | -0.0039  | 0.0073 |
| Sleeplessness / insomnia                                                                                             | European  | 0.3672  | 0.0497 | 7.3841  | 1.53E-13 | 0.0629 | 0.0028 | 1.0153 | 0.0097 | 0.0012   | 0.0064 |
| Neuroticism score                                                                                                    | European  | 0.4662  | 0.0631 | 7.3839  | 1.54E-13 | 0.1183 | 0.0065 | 1.0182 | 0.0146 | 0.0055   | 0.0077 |
| Alcohol drinker status: Previous                                                                                     | European  | 0.6096  | 0.0828 | 7.3616  | 1.82E-13 | 0.0130 | 0.0016 | 1.0083 | 0.0074 | -0.0028  | 0.0050 |
| Illnesses of siblings: None of the above (group 1)                                                                   | European  | -0.3904 | 0.0531 | -7.3550 | 1.91E-13 | 0.0361 | 0.0026 | 1.0148 | 0.0077 | -0.0038  | 0.0050 |
| Blood clot DVT bronchitis emphysema asthma rhinitis eczema allergy diagnosed by doctor: Emphysema/chronic bronchitis | European  | 0.5874  | 0.0801 | 7.3365  | 2.19E-13 | 0.0126 | 0.0017 | 0.9856 | 0.0078 | -0.0044  | 0.0057 |
| Diagnoses - main ICD10: R10 Abdominal and pelvic pain                                                                | European  | 0.5679  | 0.0776 | 7.3149  | 2.58E-13 | 0.0127 | 0.0016 | 0.9917 | 0.0072 | -0.0037  | 0.0054 |
| Pain type(s) experienced in last month: Pain all over the body                                                       | European  | 0.6529  | 0.0897 | 7.2782  | 3.38E-13 | 0.0100 | 0.0016 | 1.0057 | 0.0072 | 0.0028   | 0.0053 |
| Vascular/heart problems diagnosed by doctor: Angina                                                                  | European  | 0.4154  | 0.0573 | 7.2492  | 4.19E-13 | 0.0218 | 0.0021 | 1.0275 | 0.0079 | -0.0014  | 0.0050 |
| Non-cancer illness code self-reported: emphysema/chronic bronchitis                                                  | European  | 0.6171  | 0.0854 | 7.2254  | 5.00E-13 | 0.0099 | 0.0016 | 0.9870 | 0.0074 | -0.0039  | 0.0056 |
| Qualifications: O levels/GCSEs or equivalent                                                                         | European  | -0.3599 | 0.0509 | -7.0725 | 1.52E-12 | 0.0490 | 0.0024 | 1.0138 | 0.0096 | 0.0063   | 0.0062 |
| Illness injury bereavement stress in last 2 years: Serious illness injury or assault to yourself                     | European  | 0.5646  | 0.0802 | 7.0364  | 1.97E-12 | 0.0144 | 0.0016 | 1.0099 | 0.0070 | -0.0058  | 0.0051 |
| Non-cancer illness code self-reported: angina                                                                        | European  | 0.4068  | 0.0585 | 6.9590  | 3.43E-12 | 0.0224 | 0.0021 | 1.0243 | 0.0079 | -0.0008  | 0.0051 |
| Financial situation satisfaction                                                                                     | European  | 0.4438  | 0.0648 | 6.8522  | 7.27E-12 | 0.0579 | 0.0060 | 1.0045 | 0.0080 | 0.0039   | 0.0055 |
| Body mass index (BMI)                                                                                                | European  | 0.2445  | 0.0358 | 6.8388  | 7.99E-12 | 0.2478 | 0.0092 | 1.0733 | 0.0206 | 0.0042   | 0.0080 |
| Noisy workplace                                                                                                      | European  | 0.4667  | 0.0685 | 6.8152  | 9.41E-12 | 0.0617 | 0.0060 | 1.0283 | 0.0079 | -0.0033  | 0.0057 |
| Types of physical activity in last 4 weeks: Walking for pleasure (not as a means of transport)                       | European  | -0.3406 | 0.0510 | -6.6803 | 2.38E-11 | 0.0367 | 0.0023 | 1.0445 | 0.0087 | -0.0053  | 0.0060 |
| Sensitivity / hurt feelings                                                                                          | European  | 0.3644  | 0.0546 | 6.6779  | 2.42E-11 | 0.0635 | 0.0032 | 1.0163 | 0.0098 | 0.0009   | 0.0068 |
| Non-cancer illness code self-reported: osteoarthritis                                                                | European  | 0.4742  | 0.0711 | 6.6670  | 2.61E-11 | 0.0189 | 0.0018 | 1.0282 | 0.0082 | -0.0058  | 0.0055 |
| Illnesses of father: Chronic bronchitis/emphysema                                                                    | European  | 0.5169  | 0.0784 | 6.5963  | 4.21E-11 | 0.0151 | 0.0020 | 1.0220 | 0.0073 | -0.0016  | 0.0055 |
| Number of full sisters                                                                                               | European  | 0.4714  | 0.0716 | 6.5843  | 4.57E-11 | 0.0185 | 0.0018 | 1.0408 | 0.0071 | 0.0026   | 0.0054 |
| Ever had stillbirth spontaneous miscarriage or termination                                                           | European  | 0.5862  | 0.0894 | 6.5559  | 5.53E-11 | 0.0200 | 0.0033 | 0.9954 | 0.0080 | -0.0079  | 0.0056 |

| Trait                                                                                                          | ethnicity | rg      | SE     | z       | p        | h2_obs | se     | h2_int | se     | gcov_int | se     |
|----------------------------------------------------------------------------------------------------------------|-----------|---------|--------|---------|----------|--------|--------|--------|--------|----------|--------|
| Pain type(s) experienced in last month: Stomach or abdominal pain                                              | European  | 0.4736  | 0.0723 | 6.5507  | 5.73E-11 | 0.0213 | 0.0017 | 1.0087 | 0.0074 | 0.0052   | 0.0056 |
| Fluid intelligence score                                                                                       | European  | -0.2533 | 0.0394 | -6.4371 | 1.22E-10 | 0.2377 | 0.0109 | 1.0426 | 0.0106 | 0.0045   | 0.0063 |
| Leg fat mass (right)                                                                                           | European  | 0.2271  | 0.0354 | 6.4161  | 1.40E-10 | 0.2310 | 0.0084 | 1.0697 | 0.0192 | 0.0088   | 0.0078 |
| Arm fat percentage (right)                                                                                     | European  | 0.2284  | 0.0359 | 6.3587  | 2.03E-10 | 0.2152 | 0.0078 | 1.0831 | 0.0192 | 0.0053   | 0.0074 |
| Guilty feelings                                                                                                | European  | 0.3831  | 0.0605 | 6.3362  | 2.36E-10 | 0.0519 | 0.0027 | 1.0037 | 0.0088 | 0.0027   | 0.0066 |
| Leg fat mass (left)                                                                                            | European  | 0.2245  | 0.0355 | 6.3236  | 2.56E-10 | 0.2317 | 0.0085 | 1.0719 | 0.0194 | 0.0084   | 0.0078 |
| Job involves shift work                                                                                        | European  | 0.3870  | 0.0614 | 6.2999  | 2.98E-10 | 0.0310 | 0.0029 | 1.0007 | 0.0067 | -0.0046  | 0.0049 |
| Exposure to tobacco smoke at home                                                                              | European  | 0.5169  | 0.0826 | 6.2597  | 3.86E-10 | 0.0119 | 0.0017 | 0.9979 | 0.0064 | -0.0009  | 0.0053 |
| Medication for cholesterol blood pressure diabetes or take exogenous hormones: None of the above               | European  | -0.3335 | 0.0534 | -6.2424 | 4.31E-10 | 0.0664 | 0.0047 | 1.0173 | 0.0099 | 0.0070   | 0.0058 |
| Illnesses of siblings: Severe depression                                                                       | European  | 0.4861  | 0.0781 | 6.2220  | 4.91E-10 | 0.0143 | 0.0019 | 1.0034 | 0.0070 | 0.0007   | 0.0046 |
| Forced vital capacity (FVC) Best measure                                                                       | European  | -0.2088 | 0.0336 | -6.2148 | 5.14E-10 | 0.1898 | 0.0088 | 1.0777 | 0.0174 | 0.0065   | 0.0068 |
| Pain type(s) experienced in last month: Headache                                                               | European  | 0.3362  | 0.0543 | 6.1895  | 6.04E-10 | 0.0445 | 0.0027 | 1.0071 | 0.0094 | 0.0051   | 0.0062 |
| Body fat percentage                                                                                            | European  | 0.2182  | 0.0353 | 6.1872  | 6.13E-10 | 0.2159 | 0.0075 | 1.0876 | 0.0192 | 0.0062   | 0.0077 |
| Diabetes diagnosed by doctor                                                                                   | European  | 0.2965  | 0.0480 | 6.1749  | 6.62E-10 | 0.0433 | 0.0027 | 1.0428 | 0.0113 | -0.0030  | 0.0061 |
| Tobacco smoking: Ex-smoker                                                                                     | European  | 0.4675  | 0.0758 | 6.1697  | 6.84E-10 | 0.0769 | 0.0083 | 1.0084 | 0.0083 | 0.0032   | 0.0058 |
| Number of full brothers                                                                                        | European  | 0.4125  | 0.0669 | 6.1610  | 7.23E-10 | 0.0191 | 0.0019 | 1.0262 | 0.0073 | 0.0055   | 0.0056 |
| Arm fat percentage (left)                                                                                      | European  | 0.2228  | 0.0362 | 6.1569  | 7.42E-10 | 0.2188 | 0.0080 | 1.0773 | 0.0193 | 0.0035   | 0.0076 |
| Types of physical activity in last 4 weeks: Heavy DIY (eg: weeding lawn mowing carpentry digging)              | European  | -0.3265 | 0.0534 | -6.1140 | 9.71E-10 | 0.0340 | 0.0020 | 1.0080 | 0.0076 | -0.0040  | 0.0060 |
| Qualifications: NVQ or HND or HNC or equivalent                                                                | European  | 0.4287  | 0.0708 | 6.0554  | 1.40E-09 | 0.0150 | 0.0017 | 1.0107 | 0.0072 | -0.0108  | 0.0052 |
| Mothers age at death                                                                                           | European  | -0.4897 | 0.0814 | -6.0134 | 1.82E-09 | 0.0249 | 0.0030 | 1.0260 | 0.0077 | -0.0035  | 0.0062 |
| Had other major operations                                                                                     | European  | 0.3937  | 0.0661 | 5.9539  | 2.62E-09 | 0.0296 | 0.0031 | 1.0127 | 0.0071 | 0.0060   | 0.0052 |
| Standing height                                                                                                | European  | -0.1613 | 0.0272 | -5.9357 | 2.93E-09 | 0.4485 | 0.0236 | 1.2615 | 0.0576 | 0.0105   | 0.0084 |
| Qualifications: Other professional qualifications eg: nursing teaching                                         | European  | -0.2603 | 0.0444 | -5.8681 | 4.41E-09 | 0.0471 | 0.0024 | 1.0272 | 0.0090 | -0.0135  | 0.0057 |
| Waist circumference                                                                                            | European  | 0.2124  | 0.0364 | 5.8413  | 5.18E-09 | 0.2003 | 0.0081 | 1.0630 | 0.0191 | 0.0091   | 0.0074 |
| Forced expiratory volume in 1-second (FEV1) Best measure                                                       | European  | -0.2112 | 0.0368 | -5.7327 | 9.88E-09 | 0.1635 | 0.0076 | 1.0546 | 0.0144 | 0.0032   | 0.0069 |
| Medication for pain relief constipation heartburn: Laxatives (e.g. Dulcolax Senokot)                           | European  | 0.4241  | 0.0740 | 5.7286  | 1.01E-08 | 0.0115 | 0.0016 | 1.0095 | 0.0071 | -0.0010  | 0.0053 |
| Mouth/teeth dental problems: Loose teeth                                                                       | European  | 0.4242  | 0.0745 | 5.6918  | 1.26E-08 | 0.0146 | 0.0017 | 1.0100 | 0.0071 | -0.0035  | 0.0055 |
| Job involves mainly walking or standing                                                                        | European  | 0.2758  | 0.0485 | 5.6879  | 1.29E-08 | 0.0799 | 0.0046 | 1.0314 | 0.0096 | 0.0016   | 0.0058 |
| Illnesses of siblings: None of the above (group 2)                                                             | European  | -0.5756 | 0.1014 | -5.6763 | 1.38E-08 | 0.0089 | 0.0018 | 1.0032 | 0.0070 | -0.0013  | 0.0044 |
| Alcohol intake frequency.                                                                                      | European  | 0.2407  | 0.0424 | 5.6748  | 1.39E-08 | 0.0827 | 0.0043 | 1.0495 | 0.0119 | 0.0147   | 0.0068 |
| Medication for cholesterol blood pressure diabetes or take exogenous hormones: Cholesterol lowering medication | European  | 0.3334  | 0.0591 | 5.6431  | 1.67E-08 | 0.0513 | 0.0060 | 1.0235 | 0.0150 | -0.0026  | 0.0056 |

| Trait                                                                                                                                        | ethnicity | rg      | SE     | z       | p        | h2_obs | se     | h2_int | se     | gcov_int | se     |
|----------------------------------------------------------------------------------------------------------------------------------------------|-----------|---------|--------|---------|----------|--------|--------|--------|--------|----------|--------|
| Smoking/smokers in household                                                                                                                 | European  | 0.5683  | 0.1009 | 5.6307  | 1.80E-08 | 0.0095 | 0.0020 | 1.0143 | 0.0077 | 0.0027   | 0.0054 |
| Forced vital capacity (FVC)                                                                                                                  | European  | -0.1878 | 0.0336 | -5.5950 | 2.21E-08 | 0.1717 | 0.0077 | 1.0887 | 0.0181 | 0.0065   | 0.0069 |
| Forced expiratory volume in 1-second (FEV1)                                                                                                  | European  | -0.2044 | 0.0365 | -5.5947 | 2.21E-08 | 0.1486 | 0.0065 | 1.0614 | 0.0146 | 0.0050   | 0.0069 |
| Number of live births                                                                                                                        | European  | 0.2688  | 0.0482 | 5.5741  | 2.49E-08 | 0.0612 | 0.0042 | 1.0093 | 0.0086 | -0.0052  | 0.0053 |
| Vascular/heart problems diagnosed by doctor: None of the above                                                                               | European  | -0.2192 | 0.0393 | -5.5714 | 2.53E-08 | 0.1144 | 0.0048 | 1.0553 | 0.0157 | 0.0014   | 0.0072 |
| Arm fat mass (right)                                                                                                                         | European  | 0.2008  | 0.0361 | 5.5554  | 2.77E-08 | 0.2312 | 0.0090 | 1.0715 | 0.0200 | 0.0077   | 0.0076 |
| Illnesses of mother: Chronic bronchitis/emphysema                                                                                            | European  | 0.4129  | 0.0756 | 5.4615  | 4.72E-08 | 0.0124 | 0.0019 | 1.0063 | 0.0068 | 0.0077   | 0.0051 |
| Arm fat mass (left)                                                                                                                          | European  | 0.1972  | 0.0361 | 5.4600  | 4.76E-08 | 0.2318 | 0.0090 | 1.0687 | 0.0200 | 0.0067   | 0.0076 |
| Number of cigarettes previously smoked daily                                                                                                 | European  | 0.3552  | 0.0653 | 5.4428  | 5.25E-08 | 0.0986 | 0.0141 | 1.0044 | 0.0096 | -0.0009  | 0.0054 |
| Frequency of stair climbing in last 4 weeks                                                                                                  | European  | -0.2745 | 0.0505 | -5.4305 | 5.62E-08 | 0.0348 | 0.0022 | 1.0184 | 0.0077 | 0.0116   | 0.0058 |
| Other eye problems                                                                                                                           | European  | 0.5067  | 0.0936 | 5.4135  | 6.18E-08 | 0.0094 | 0.0015 | 1.0231 | 0.0074 | 0.0003   | 0.0050 |
| Non-cancer illness code self-reported: diabetes                                                                                              | European  | 0.2945  | 0.0545 | 5.4060  | 6.45E-08 | 0.0354 | 0.0025 | 1.0406 | 0.0109 | -0.0030  | 0.0063 |
| Ever manic/hyper for 2 days                                                                                                                  | European  | 0.6350  | 0.1178 | 5.3906  | 7.02E-08 | 0.0193 | 0.0049 | 0.9928 | 0.0070 | -0.0077  | 0.0048 |
| Medication for pain relief constipation heartburn: Aspirin                                                                                   | European  | 0.3511  | 0.0653 | 5.3740  | 7.70E-08 | 0.0210 | 0.0020 | 1.0141 | 0.0075 | -0.0020  | 0.0055 |
| Whole body fat mass                                                                                                                          | European  | 0.1877  | 0.0351 | 5.3480  | 8.89E-08 | 0.2345 | 0.0087 | 1.0755 | 0.0202 | 0.0092   | 0.0076 |
| Hearing difficulty/problems with background noise                                                                                            | European  | 0.2441  | 0.0460 | 5.3095  | 1.10E-07 | 0.0516 | 0.0026 | 1.0201 | 0.0089 | 0.0002   | 0.0056 |
| Diagnoses - main ICD10: M54 Dorsalgia                                                                                                        | European  | 0.4632  | 0.0884 | 5.2372  | 1.63E-07 | 0.0104 | 0.0015 | 1.0018 | 0.0069 | 0.0008   | 0.0056 |
| Trunk fat percentage                                                                                                                         | European  | 0.1812  | 0.0355 | 5.1034  | 3.34E-07 | 0.2057 | 0.0076 | 1.0897 | 0.0193 | 0.0074   | 0.0075 |
| Fathers age at death                                                                                                                         | European  | -0.3184 | 0.0624 | -5.1012 | 3.37E-07 | 0.0345 | 0.0032 | 1.0213 | 0.0079 | -0.0050  | 0.0055 |
| Risk taking                                                                                                                                  | European  | 0.2399  | 0.0473 | 5.0760  | 3.85E-07 | 0.0554 | 0.0029 | 1.0067 | 0.0098 | 0.0050   | 0.0060 |
| Diagnoses - main ICD10: K21 Gastro-oesophageal reflux disease                                                                                | European  | 0.6244  | 0.1244 | 5.0207  | 5.15E-07 | 0.0063 | 0.0013 | 1.0030 | 0.0064 | -0.0084  | 0.0052 |
| Irritability                                                                                                                                 | European  | 0.3557  | 0.0712 | 4.9944  | 5.90E-07 | 0.0679 | 0.0042 | 0.9930 | 0.0118 | -0.0048  | 0.0078 |
| Time spent watching television (TV)                                                                                                          | European  | 0.2022  | 0.0407 | 4.9711  | 6.66E-07 | 0.1001 | 0.0040 | 1.0532 | 0.0109 | 0.0072   | 0.0066 |
| Illnesses of siblings: High blood pressure                                                                                                   | European  | 0.2504  | 0.0507 | 4.9377  | 7.91E-07 | 0.0369 | 0.0027 | 1.0056 | 0.0077 | 0.0055   | 0.0048 |
| Frequency of walking for pleasure in last 4 weeks                                                                                            | European  | 0.2914  | 0.0593 | 4.9111  | 9.06E-07 | 0.0341 | 0.0026 | 1.0090 | 0.0079 | 0.0032   | 0.0055 |
| Hearing difficulty/problems: Yes                                                                                                             | European  | 0.2284  | 0.0465 | 4.9106  | 9.08E-07 | 0.0421 | 0.0026 | 1.0110 | 0.0096 | 0.0005   | 0.0059 |
| Vascular/heart problems diagnosed by doctor: Heart attack                                                                                    | European  | 0.2902  | 0.0593 | 4.8962  | 9.77E-07 | 0.0185 | 0.0019 | 1.0151 | 0.0082 | 0.0000   | 0.0053 |
| Hand grip strength (right)                                                                                                                   | European  | -0.1749 | 0.0359 | -4.8796 | 1.06E-06 | 0.1040 | 0.0042 | 1.0613 | 0.0137 | 0.0045   | 0.0062 |
| Reason for glasses/contact lenses: For short-sightedness i.e. only or mainly for distance viewing such as driving cinema etc (called myopia) | European  | -0.3199 | 0.0657 | -4.8706 | 1.11E-06 | 0.0248 | 0.0021 | 1.1198 | 0.0090 | 0.0043   | 0.0058 |
| Diagnoses - main ICD10: N92 Excessive frequent and irregular menstruation                                                                    | European  | 0.5087  | 0.1047 | 4.8574  | 1.19E-06 | 0.0071 | 0.0018 | 1.0006 | 0.0078 | -0.0036  | 0.0055 |
| Non-cancer illness code self-reported: heart attack/myocardial infarction                                                                    | European  | 0.2790  | 0.0577 | 4.8384  | 1.31E-06 | 0.0190 | 0.0019 | 1.0128 | 0.0081 | 0.0008   | 0.0052 |
| Suffer from nerves                                                                                                                           | European  | 0.3229  | 0.0670 | 4.8233  | 1.41E-06 | 0.0458 | 0.0034 | 0.9984 | 0.0106 | 0.0064   | 0.0066 |



| Trait                                                                                                      | ethnicity | rg      | SE     | z       | p        | h2_obs | se     | h2_int | se     | gcov_int | se     |
|------------------------------------------------------------------------------------------------------------|-----------|---------|--------|---------|----------|--------|--------|--------|--------|----------|--------|
| Types of transport used (excluding work): Car/motor vehicle                                                | European  | -0.2897 | 0.0603 | -4.8037 | 1.56E-06 | 0.0247 | 0.0018 | 1.0072 | 0.0077 | 0.0017   | 0.0060 |
| Former alcohol drinker                                                                                     | European  | 0.4929  | 0.1028 | 4.7950  | 1.63E-06 | 0.1234 | 0.0215 | 0.9963 | 0.0066 | -0.0085  | 0.0048 |
| Non-cancer illness code self-reported: chronic obstructive airways disease/copd                            | European  | 0.5553  | 0.1161 | 4.7849  | 1.71E-06 | 0.0061 | 0.0015 | 0.9913 | 0.0071 | -0.0112  | 0.0053 |
| Peak expiratory flow (PEF)                                                                                 | European  | -0.2166 | 0.0454 | -4.7703 | 1.84E-06 | 0.0896 | 0.0048 | 1.0579 | 0.0130 | 0.0128   | 0.0071 |
| Trunk fat mass                                                                                             | European  | 0.1637  | 0.0348 | 4.7043  | 2.55E-06 | 0.2307 | 0.0086 | 1.0827 | 0.0207 | 0.0086   | 0.0076 |
| Number of unsuccessful stop-smoking attempts                                                               | European  | 0.3831  | 0.0820 | 4.6705  | 3.00E-06 | 0.0500 | 0.0072 | 1.0066 | 0.0070 | -0.0026  | 0.0056 |
| Average weekly champagne plus white wine intake                                                            | European  | -0.2978 | 0.0647 | -4.6061 | 4.10E-06 | 0.0299 | 0.0028 | 1.0441 | 0.0084 | -0.0027  | 0.0056 |
| Hand grip strength (left)                                                                                  | European  | -0.1653 | 0.0361 | -4.5819 | 4.61E-06 | 0.1044 | 0.0042 | 1.0541 | 0.0122 | 0.0045   | 0.0062 |
| Types of physical activity in last 4 weeks: Light DIY (eg: pruning watering the lawn)                      | European  | -0.2477 | 0.0542 | -4.5706 | 4.86E-06 | 0.0397 | 0.0023 | 1.0009 | 0.0091 | -0.0070  | 0.0059 |
| Mouth/teeth dental problems: Painful gums                                                                  | European  | 0.5431  | 0.1188 | 4.5696  | 4.89E-06 | 0.0070 | 0.0015 | 1.0037 | 0.0069 | -0.0062  | 0.0048 |
| Difficulty not smoking for 1 day                                                                           | European  | 0.4337  | 0.0950 | 4.5644  | 5.01E-06 | 0.1192 | 0.0225 | 0.9854 | 0.0066 | -0.0108  | 0.0052 |
| Diagnoses - main ICD10: K29 Gastritis and duodenitis                                                       | European  | 0.4582  | 0.1004 | 4.5638  | 5.02E-06 | 0.0074 | 0.0015 | 1.0043 | 0.0065 | 0.0048   | 0.0055 |
| Back pain for 3+ months                                                                                    | European  | 0.4040  | 0.0893 | 4.5265  | 6.00E-06 | 0.0405 | 0.0058 | 0.9914 | 0.0070 | 0.0007   | 0.0057 |
| Illnesses of siblings: Heart disease                                                                       | European  | 0.3393  | 0.0750 | 4.5236  | 6.08E-06 | 0.0167 | 0.0022 | 1.0143 | 0.0071 | 0.0056   | 0.0051 |
| Family relationship satisfaction                                                                           | European  | 0.2779  | 0.0620 | 4.4848  | 7.30E-06 | 0.0576 | 0.0049 | 1.0046 | 0.0074 | -0.0033  | 0.0052 |
| Impedance of arm (left)                                                                                    | European  | -0.1583 | 0.0353 | -4.4836 | 7.34E-06 | 0.2327 | 0.0089 | 1.1015 | 0.0239 | -0.0013  | 0.0082 |
| Loud music exposure frequency                                                                              | European  | 0.3716  | 0.0830 | 4.4752  | 7.63E-06 | 0.0286 | 0.0045 | 1.0141 | 0.0072 | 0.0007   | 0.0049 |
| Average weekly red wine intake                                                                             | European  | -0.2361 | 0.0531 | -4.4491 | 8.62E-06 | 0.0561 | 0.0034 | 1.0150 | 0.0087 | -0.0082  | 0.0060 |
| Forced expiratory volume in 1-second (FEV1) predicted                                                      | European  | -0.1851 | 0.0417 | -4.4371 | 9.12E-06 | 0.1721 | 0.0130 | 1.0390 | 0.0126 | 0.0110   | 0.0061 |
| Ever had hysterectomy (womb removed)                                                                       | European  | 0.4067  | 0.0921 | 4.4138  | 1.02E-05 | 0.0217 | 0.0035 | 1.0053 | 0.0082 | 0.0070   | 0.0059 |
| Non-cancer illness code self-reported: hypertension                                                        | European  | 0.1812  | 0.0412 | 4.4018  | 1.07E-05 | 0.1162 | 0.0051 | 1.0494 | 0.0169 | -0.0007  | 0.0071 |
| Time from waking to first cigarette                                                                        | European  | -0.4885 | 0.1111 | -4.3972 | 1.10E-05 | 0.0905 | 0.0258 | 1.0132 | 0.0078 | -0.0005  | 0.0052 |
| Illnesses of siblings: Diabetes                                                                            | European  | 0.2979  | 0.0678 | 4.3968  | 1.10E-05 | 0.0205 | 0.0022 | 1.0100 | 0.0069 | 0.0065   | 0.0055 |
| Vascular/heart problems diagnosed by doctor: High blood pressure                                           | European  | 0.1824  | 0.0415 | 4.3943  | 1.11E-05 | 0.1177 | 0.0051 | 1.0554 | 0.0168 | -0.0002  | 0.0074 |
| Alcohol intake versus 10 years previously                                                                  | European  | 0.2485  | 0.0571 | 4.3518  | 1.35E-05 | 0.0349 | 0.0026 | 1.0290 | 0.0090 | 0.0048   | 0.0059 |
| Happiness                                                                                                  | European  | 0.2573  | 0.0593 | 4.3363  | 1.45E-05 | 0.0599 | 0.0050 | 1.0086 | 0.0076 | 0.0066   | 0.0050 |
| Average weekly beer plus cider intake                                                                      | European  | 0.2747  | 0.0644 | 4.2685  | 1.97E-05 | 0.0515 | 0.0035 | 1.0627 | 0.0097 | -0.0067  | 0.0061 |
| Illness injury bereavement stress in last 2 years: Marital separation/divorce                              | European  | 0.6192  | 0.1453 | 4.2629  | 2.02E-05 | 0.0044 | 0.0015 | 1.0082 | 0.0074 | -0.0034  | 0.0053 |
| Number of cigarettes currently smoked daily (current cigarette smokers)                                    | European  | 0.4444  | 0.1048 | 4.2381  | 2.25E-05 | 0.1039 | 0.0264 | 0.9999 | 0.0077 | -0.0047  | 0.0056 |
| Medication for cholesterol blood pressure diabetes or take exogenous hormones: Hormone replacement therapy | European  | 0.3863  | 0.0914 | 4.2287  | 2.35E-05 | 0.0158 | 0.0027 | 1.0004 | 0.0067 | -0.0014  | 0.0051 |
| Current employment status: Doing unpaid or voluntary work                                                  | European  | -0.3908 | 0.0925 | -4.2236 | 2.40E-05 | 0.0089 | 0.0015 | 1.0105 | 0.0073 | 0.0050   | 0.0050 |

| Trait                                                                                                          | ethnicity | rg      | SE     | z       | p        | h2_obs | se     | h2_int | se     | gcov_int | se     |
|----------------------------------------------------------------------------------------------------------------|-----------|---------|--------|---------|----------|--------|--------|--------|--------|----------|--------|
| Qualifications: CSEs or equivalent                                                                             | European  | 0.2665  | 0.0634 | 4.2014  | 2.65E-05 | 0.0210 | 0.0020 | 1.0587 | 0.0079 | 0.0048   | 0.0052 |
| Current employment status: In paid employment or self-employed                                                 | European  | -0.3902 | 0.0930 | -4.1960 | 2.72E-05 | 0.0082 | 0.0015 | 1.0181 | 0.0067 | 0.0052   | 0.0051 |
| Bilateral oophorectomy (both ovaries removed)                                                                  | European  | 0.3371  | 0.0808 | 4.1724  | 3.01E-05 | 0.0211 | 0.0032 | 1.0113 | 0.0076 | 0.0068   | 0.0055 |
| Forced expiratory volume in 1-second (FEV1) predicted percentage                                               | European  | -0.1883 | 0.0453 | -4.1540 | 3.27E-05 | 0.2024 | 0.0102 | 1.0330 | 0.0102 | -0.0033  | 0.0063 |
| Adopted as a child                                                                                             | European  | 0.4967  | 0.1196 | 4.1534  | 3.28E-05 | 0.0056 | 0.0014 | 1.0032 | 0.0067 | 0.0047   | 0.0056 |
| Duration walking for pleasure                                                                                  | European  | -0.2589 | 0.0627 | -4.1309 | 3.61E-05 | 0.0248 | 0.0025 | 1.0139 | 0.0073 | 0.0008   | 0.0048 |
| Why stopped smoking: Doctors advice                                                                            | European  | 0.7202  | 0.1745 | 4.1274  | 3.67E-05 | 0.0158 | 0.0050 | 1.0016 | 0.0061 | -0.0046  | 0.0052 |
| Chest pain or discomfort walking normally                                                                      | European  | 0.3525  | 0.0858 | 4.1057  | 4.03E-05 | 0.0768 | 0.0092 | 1.0065 | 0.0075 | 0.0074   | 0.0058 |
| Medication for cholesterol blood pressure diabetes or take exogenous hormones: Blood pressure medication       | European  | 0.2103  | 0.0514 | 4.0931  | 4.26E-05 | 0.1057 | 0.0067 | 1.0306 | 0.0126 | -0.0082  | 0.0068 |
| Sitting height                                                                                                 | European  | -0.1168 | 0.0286 | -4.0771 | 4.56E-05 | 0.3199 | 0.0187 | 1.1451 | 0.0437 | 0.0090   | 0.0077 |
| Breastfed as a baby                                                                                            | European  | -0.2657 | 0.0654 | -4.0661 | 4.78E-05 | 0.0258 | 0.0024 | 1.0221 | 0.0078 | -0.0071  | 0.0060 |
| Average weekly fortified wine intake                                                                           | European  | -0.3632 | 0.0896 | -4.0549 | 5.02E-05 | 0.0127 | 0.0022 | 1.0177 | 0.0073 | 0.0047   | 0.0054 |
| Non-cancer illness code self-reported: pulmonary embolism +/- dvt                                              | European  | 0.5340  | 0.1328 | 4.0210  | 5.80E-05 | 0.0052 | 0.0015 | 1.0105 | 0.0074 | -0.0129  | 0.0052 |
| Had major operations                                                                                           | European  | 0.2974  | 0.0740 | 4.0187  | 5.85E-05 | 0.0252 | 0.0037 | 1.0047 | 0.0075 | 0.0037   | 0.0052 |
| Blood clot DVT bronchitis emphysema asthma rhinitis eczema allergy diagnosed by doctor: Asthma                 | European  | 0.1703  | 0.0424 | 4.0150  | 5.94E-05 | 0.0576 | 0.0059 | 1.0249 | 0.0159 | 0.0088   | 0.0058 |
| Impedance of arm (right)                                                                                       | European  | -0.1440 | 0.0360 | -3.9948 | 6.48E-05 | 0.2363 | 0.0089 | 1.0845 | 0.0234 | 0.0006   | 0.0082 |
| Diagnoses - main ICD10: J44 Other chronic obstructive pulmonary disease                                        | European  | 0.5099  | 0.1277 | 3.9931  | 6.52E-05 | 0.0047 | 0.0014 | 0.9959 | 0.0069 | 0.0000   | 0.0051 |
| Pain type(s) experienced in last month: Facial pain                                                            | European  | 0.5395  | 0.1354 | 3.9846  | 6.76E-05 | 0.0069 | 0.0016 | 0.9966 | 0.0069 | -0.0034  | 0.0054 |
| Getting up in morning                                                                                          | European  | -0.1757 | 0.0441 | -3.9817 | 6.84E-05 | 0.0673 | 0.0032 | 1.0468 | 0.0115 | 0.0034   | 0.0060 |
| Blood clot DVT bronchitis emphysema asthma rhinitis eczema allergy diagnosed by doctor: Blood clot in the lung | European  | 0.4968  | 0.1254 | 3.9610  | 7.46E-05 | 0.0055 | 0.0015 | 1.0109 | 0.0076 | -0.0126  | 0.0052 |
| Types of transport used (excluding work): Cycle                                                                | European  | -0.2223 | 0.0564 | -3.9435 | 8.03E-05 | 0.0252 | 0.0018 | 1.0230 | 0.0072 | -0.0112  | 0.0056 |
| Prospective memory result                                                                                      | European  | 0.2500  | 0.0638 | 3.9174  | 8.95E-05 | 0.0581 | 0.0051 | 1.0113 | 0.0079 | -0.0013  | 0.0058 |
| Hip circumference                                                                                              | European  | 0.1374  | 0.0356 | 3.8638  | 1.00E-04 | 0.2173 | 0.0093 | 1.0827 | 0.0206 | 0.0058   | 0.0077 |
| Weight                                                                                                         | European  | 0.1278  | 0.0337 | 3.7976  | 1.00E-04 | 0.2656 | 0.0107 | 1.0852 | 0.0243 | 0.0098   | 0.0076 |
| Non-cancer illness code self-reported: asthma                                                                  | European  | 0.1690  | 0.0437 | 3.8691  | 1.00E-04 | 0.0582 | 0.0060 | 1.0263 | 0.0158 | 0.0086   | 0.0060 |
| Non-cancer illness code self-reported: gastro-oesophageal reflux (gord) / gastric reflux                       | European  | 0.3186  | 0.0832 | 3.8295  | 1.00E-04 | 0.0114 | 0.0017 | 1.0138 | 0.0074 | -0.0010  | 0.0059 |
| Illnesses of mother: Heart disease                                                                             | European  | 0.2584  | 0.0671 | 3.8485  | 1.00E-04 | 0.0157 | 0.0019 | 1.0107 | 0.0073 | 0.0020   | 0.0052 |
| Diagnoses - main ICD10: K44 Diaphragmatic hernia                                                               | European  | 0.4439  | 0.1142 | 3.8860  | 1.00E-04 | 0.0047 | 0.0013 | 1.0085 | 0.0066 | 0.0000   | 0.0050 |
| Diagnoses - main ICD10: K52 Other non-infective gastro-enteritis and colitis                                   | European  | 0.4931  | 0.1296 | 3.8038  | 1.00E-04 | 0.0050 | 0.0013 | 1.0028 | 0.0062 | 0.0000   | 0.0057 |
| Work/job satisfaction                                                                                          | European  | 0.2998  | 0.0793 | 3.7789  | 2.00E-04 | 0.0475 | 0.0070 | 0.9964 | 0.0068 | -0.0091  | 0.0051 |

| Trait                                                                                                               | ethnicity | rg      | SE     | z       | p        | h2_obs | se     | h2_int | se     | gcov_int | se     |
|---------------------------------------------------------------------------------------------------------------------|-----------|---------|--------|---------|----------|--------|--------|--------|--------|----------|--------|
| Non-cancer illness code self-reported: diverticular disease/ diverticulitis                                         | European  | 0.2749  | 0.0732 | 3.7581  | 2.00E-04 | 0.0128 | 0.0017 | 0.9930 | 0.0073 | -0.0029  | 0.0050 |
| Non-cancer illness code self-reported: high cholesterol                                                             | European  | 0.1928  | 0.0509 | 3.7852  | 2.00E-04 | 0.0399 | 0.0058 | 1.0596 | 0.0297 | 0.0016   | 0.0060 |
| Illnesses of mother: Diabetes                                                                                       | European  | 0.2329  | 0.0630 | 3.6957  | 2.00E-04 | 0.0199 | 0.0020 | 1.0212 | 0.0094 | -0.0028  | 0.0056 |
| Transport type for commuting to job workplace: Cycle                                                                | European  | -0.2424 | 0.0645 | -3.7591 | 2.00E-04 | 0.0310 | 0.0033 | 1.0177 | 0.0071 | -0.0042  | 0.0054 |
| Mouth/teeth dental problems: Toothache                                                                              | European  | 0.3702  | 0.0988 | 3.7469  | 2.00E-04 | 0.0084 | 0.0016 | 1.0047 | 0.0077 | -0.0025  | 0.0055 |
| Blood clot DVT bronchitis emphysema asthma rhinitis eczema allergy diagnosed by doctor: Blood clot in the leg (DVT) | European  | 0.3400  | 0.0917 | 3.7089  | 2.00E-04 | 0.0103 | 0.0018 | 1.0130 | 0.0099 | -0.0045  | 0.0054 |
| Types of physical activity in last 4 weeks: Strenuous sports                                                        | European  | -0.2102 | 0.0572 | -3.6746 | 2.00E-04 | 0.0219 | 0.0018 | 1.0122 | 0.0071 | -0.0109  | 0.0056 |
| Diagnoses - main ICD10: M17 Gonarthrosis [arthrosis of knee]                                                        | European  | 0.2827  | 0.0764 | 3.6994  | 2.00E-04 | 0.0141 | 0.0018 | 1.0059 | 0.0079 | -0.0002  | 0.0057 |
| Nervous feelings                                                                                                    | European  | 0.2457  | 0.0678 | 3.6220  | 3.00E-04 | 0.0670 | 0.0044 | 1.0100 | 0.0133 | 0.0017   | 0.0073 |
| Neck/shoulder pain for 3+ months                                                                                    | European  | 0.5552  | 0.1547 | 3.5887  | 3.00E-04 | 0.0199 | 0.0064 | 1.0102 | 0.0073 | -0.0004  | 0.0051 |
| Impedance of whole body                                                                                             | European  | -0.1266 | 0.0351 | -3.6010 | 3.00E-04 | 0.2591 | 0.0103 | 1.0865 | 0.0243 | 0.0009   | 0.0085 |
| Non-cancer illness code self-reported: anxiety/ panic attacks                                                       | European  | 0.3731  | 0.1040 | 3.5858  | 3.00E-04 | 0.0061 | 0.0012 | 0.9997 | 0.0058 | 0.0102   | 0.0051 |
| Tinnitus: Yes but not now but have in the past                                                                      | European  | 0.4340  | 0.1203 | 3.6082  | 3.00E-04 | 0.0181 | 0.0042 | 0.9920 | 0.0067 | -0.0021  | 0.0051 |
| Illness injury bereavement stress in last 2 years: Death of a close relative                                        | European  | 0.3882  | 0.1069 | 3.6307  | 3.00E-04 | 0.0064 | 0.0016 | 1.0039 | 0.0070 | -0.0021  | 0.0050 |
| Comparative height size at age 10                                                                                   | European  | -0.1079 | 0.0305 | -3.5383 | 4.00E-04 | 0.2403 | 0.0126 | 1.1179 | 0.0346 | 0.0191   | 0.0070 |
| Worry too long after embarrassment                                                                                  | European  | 0.1916  | 0.0541 | 3.5417  | 4.00E-04 | 0.0644 | 0.0036 | 1.0213 | 0.0114 | -0.0024  | 0.0069 |
| Non-cancer illness code self-reported: deep venous thrombosis (dvt)                                                 | European  | 0.3177  | 0.0904 | 3.5125  | 4.00E-04 | 0.0108 | 0.0018 | 1.0105 | 0.0098 | -0.0031  | 0.0054 |
| Diagnoses - main ICD10: I20 Angina pectoris                                                                         | European  | 0.3644  | 0.1029 | 3.5413  | 4.00E-04 | 0.0087 | 0.0016 | 1.0064 | 0.0073 | 0.0059   | 0.0052 |
| Diagnoses - main ICD10: G56 Mononeuropathies of upper limb                                                          | European  | 0.2675  | 0.0770 | 3.4718  | 5.00E-04 | 0.0140 | 0.0019 | 1.0077 | 0.0078 | -0.0002  | 0.0050 |
| Non-cancer illness code self-reported: back problem                                                                 | European  | 0.3530  | 0.1032 | 3.4202  | 6.00E-04 | 0.0052 | 0.0013 | 1.0043 | 0.0065 | -0.0017  | 0.0055 |
| Illnesses of father: None of the above (group 1)                                                                    | European  | -0.2728 | 0.0795 | -3.4303 | 6.00E-04 | 0.0145 | 0.0018 | 1.0249 | 0.0073 | -0.0011  | 0.0054 |
| Mouth/teeth dental problems: Bleeding gums                                                                          | European  | 0.2301  | 0.0672 | 3.4246  | 6.00E-04 | 0.0227 | 0.0018 | 1.0093 | 0.0076 | -0.0068  | 0.0058 |
| Medication for cholesterol blood pressure or diabetes: Cholesterol lowering medication                              | European  | 0.1659  | 0.0481 | 3.4517  | 6.00E-04 | 0.0671 | 0.0068 | 1.0372 | 0.0151 | 0.0056   | 0.0054 |
| Wears glasses or contact lenses                                                                                     | European  | -0.2272 | 0.0673 | -3.3738 | 7.00E-04 | 0.0158 | 0.0016 | 1.0031 | 0.0076 | 0.0127   | 0.0053 |
| Diagnoses - main ICD10: M23 Internal derangement of knee                                                            | European  | 0.3031  | 0.0894 | 3.3923  | 7.00E-04 | 0.0082 | 0.0020 | 1.0039 | 0.0080 | -0.0033  | 0.0055 |
| Transport type for commuting to job workplace: Public transport                                                     | European  | -0.2388 | 0.0715 | -3.3419 | 8.00E-04 | 0.0318 | 0.0035 | 1.0242 | 0.0077 | 0.0069   | 0.0057 |
| Medication for pain relief constipation heartburn: Ibuprofen (e.g. Nurofen)                                         | European  | 0.2255  | 0.0671 | 3.3619  | 8.00E-04 | 0.0226 | 0.0017 | 0.9974 | 0.0067 | 0.0050   | 0.0054 |
| Diagnoses - main ICD10: K57 Diverticular disease of intestine                                                       | European  | 0.2416  | 0.0718 | 3.3661  | 8.00E-04 | 0.0130 | 0.0015 | 1.0037 | 0.0068 | 0.0008   | 0.0054 |
| Non-cancer illness code self-reported: hiatus hernia                                                                | European  | 0.3034  | 0.0920 | 3.2981  | 1.00E-03 | 0.0082 | 0.0014 | 1.0334 | 0.0064 | 0.0113   | 0.0053 |
| Weight change compared with 1 year ago                                                                              | European  | 0.2964  | 0.0905 | 3.2745  | 1.10E-03 | 0.0085 | 0.0014 | 1.0233 | 0.0067 | -0.0001  | 0.0049 |
| Fractured/broken bones in last 5 years                                                                              | European  | 0.2103  | 0.0644 | 3.2633  | 1.10E-03 | 0.0183 | 0.0022 | 1.0108 | 0.0080 | 0.0024   | 0.0052 |
| Maximum workload during fitness test                                                                                | European  | -0.3491 | 0.1066 | -3.2743 | 1.10E-03 | 0.0412 | 0.0105 | 1.0088 | 0.0075 | -0.0026  | 0.0049 |

| Trait                                                                      | ethnicity | rg      | SE     | z       | p        | h2_obs | se     | h2_int | se     | gcov_int | se     |
|----------------------------------------------------------------------------|-----------|---------|--------|---------|----------|--------|--------|--------|--------|----------|--------|
| Illnesses of siblings: Stroke                                              | European  | 0.5296  | 0.1623 | 3.2628  | 1.10E-03 | 0.0046 | 0.0019 | 1.0060 | 0.0066 | -0.0050  | 0.0053 |
| Drive faster than motorway speed limit                                     | European  | -0.1684 | 0.0525 | -3.2065 | 1.30E-03 | 0.0567 | 0.0027 | 1.0291 | 0.0090 | -0.0045  | 0.0061 |
| Diagnoses - main ICD10: K62 Other diseases of anus and rectum              | European  | 0.3893  | 0.1212 | 3.2112  | 1.30E-03 | 0.0051 | 0.0014 | 1.0016 | 0.0067 | 0.0032   | 0.0052 |
| Why reduced smoking: Illness or ill health                                 | European  | 0.5471  | 0.1709 | 3.2004  | 1.40E-03 | 0.1131 | 0.0428 | 0.9974 | 0.0063 | -0.0036  | 0.0055 |
| Number of self-reported cancers                                            | European  | 0.3208  | 0.1016 | 3.1564  | 1.60E-03 | 0.0068 | 0.0016 | 1.0111 | 0.0069 | -0.0096  | 0.0053 |
| Worrier / anxious feelings                                                 | European  | 0.2117  | 0.0669 | 3.1641  | 1.60E-03 | 0.0792 | 0.0052 | 1.0024 | 0.0135 | 0.0062   | 0.0078 |
| Duration of walks                                                          | European  | 0.1597  | 0.0508 | 3.1433  | 1.70E-03 | 0.0463 | 0.0029 | 1.0086 | 0.0091 | 0.0063   | 0.0059 |
| Duration of light DIY                                                      | European  | 0.1911  | 0.0610 | 3.1326  | 1.70E-03 | 0.0355 | 0.0035 | 1.0021 | 0.0080 | -0.0030  | 0.0051 |
| Fractured bone site(s): Other bones                                        | European  | 0.2932  | 0.0935 | 3.1350  | 1.70E-03 | 0.0084 | 0.0016 | 1.0050 | 0.0069 | 0.0024   | 0.0049 |
| Duration of heavy DIY                                                      | European  | 0.2397  | 0.0774 | 3.0977  | 2.00E-03 | 0.0336 | 0.0039 | 1.0075 | 0.0074 | -0.0031  | 0.0056 |
| Frequency of travelling from home to job workplace                         | European  | 0.2279  | 0.0740 | 3.0786  | 2.10E-03 | 0.0215 | 0.0028 | 1.0186 | 0.0068 | -0.0031  | 0.0052 |
| Daytime dozing / sleeping (narcolepsy)                                     | European  | 0.1477  | 0.0483 | 3.0550  | 2.30E-03 | 0.0483 | 0.0028 | 1.0125 | 0.0092 | 0.0017   | 0.0061 |
| Illnesses of father: Lung cancer                                           | European  | 0.2456  | 0.0811 | 3.0299  | 2.40E-03 | 0.0148 | 0.0020 | 0.9933 | 0.0076 | 0.0076   | 0.0059 |
| Light smokers at least 100 smokes in lifetime                              | European  | 0.1716  | 0.0567 | 3.0262  | 2.50E-03 | 0.0778 | 0.0075 | 1.0041 | 0.0076 | 0.0048   | 0.0056 |
| Types of transport used (excluding work): Walk                             | European  | -0.1665 | 0.0552 | -3.0187 | 2.50E-03 | 0.0329 | 0.0023 | 1.0364 | 0.0093 | -0.0096  | 0.0059 |
| Medication for cholesterol blood pressure or diabetes: None of the above   | European  | -0.1610 | 0.0532 | -3.0256 | 2.50E-03 | 0.0874 | 0.0052 | 1.0370 | 0.0109 | -0.0047  | 0.0064 |
| Bring up phlegm/sputum/mucus on most days                                  | European  | 0.2943  | 0.0982 | 2.9978  | 2.70E-03 | 0.0259 | 0.0061 | 1.0090 | 0.0077 | 0.0061   | 0.0053 |
| Current employment status: Looking after home and/or family                | European  | -0.3167 | 0.1054 | -3.0043 | 2.70E-03 | 0.0060 | 0.0014 | 1.0019 | 0.0067 | 0.0064   | 0.0054 |
| Diagnoses - main ICD10: K22 Other diseases of oesophagus                   | European  | 0.4558  | 0.1530 | 2.9789  | 2.90E-03 | 0.0041 | 0.0017 | 1.0048 | 0.0076 | -0.0029  | 0.0061 |
| Home area population density - urban or rural: Scotland - Large Urban Area | European  | -0.3575 | 0.1205 | -2.9662 | 3.00E-03 | 0.0115 | 0.0031 | 2.1330 | 0.0150 | -0.0083  | 0.0074 |
| Knee pain for 3+ months                                                    | European  | 0.3538  | 0.1198 | 2.9524  | 3.20E-03 | 0.0244 | 0.0069 | 1.0036 | 0.0070 | 0.0070   | 0.0053 |
| Number of trend entries                                                    | European  | -0.3739 | 0.1267 | -2.9510 | 3.20E-03 | 0.0302 | 0.0101 | 1.0070 | 0.0074 | -0.0024  | 0.0049 |
| Number of incorrect matches in round                                       | European  | 0.1259  | 0.0428 | 2.9399  | 3.30E-03 | 0.0543 | 0.0028 | 1.0061 | 0.0098 | 0.0005   | 0.0057 |
| Illnesses of father: None of the above (group 2)                           | European  | -0.2618 | 0.0898 | -2.9143 | 3.60E-03 | 0.0094 | 0.0017 | 1.0015 | 0.0075 | -0.0016  | 0.0051 |
| Diagnoses - main ICD10: R55 Syncope and collapse                           | European  | 0.3004  | 0.1062 | 2.8276  | 4.70E-03 | 0.0056 | 0.0014 | 1.0067 | 0.0068 | 0.0028   | 0.0053 |
| Diagnoses - main ICD10: N81 Female genital prolapse                        | European  | 0.2740  | 0.0974 | 2.8120  | 4.90E-03 | 0.0067 | 0.0015 | 1.0271 | 0.0068 | -0.0008  | 0.0054 |
| Sodium in urine                                                            | European  | 0.1219  | 0.0435 | 2.8031  | 5.10E-03 | 0.0722 | 0.0028 | 1.0244 | 0.0094 | 0.0061   | 0.0064 |
| Pulse rate automated reading                                               | European  | 0.0963  | 0.0345 | 2.7937  | 5.20E-03 | 0.1536 | 0.0122 | 1.0504 | 0.0326 | 0.0106   | 0.0071 |
| Vitamin and mineral supplements: Vitamin B                                 | European  | 0.2896  | 0.1037 | 2.7943  | 5.20E-03 | 0.0070 | 0.0016 | 1.0033 | 0.0072 | 0.0008   | 0.0053 |
| Duration of moderate activity                                              | European  | 0.1757  | 0.0646 | 2.7188  | 6.60E-03 | 0.0313 | 0.0024 | 1.0121 | 0.0084 | 0.0046   | 0.0053 |
| Ever stopped smoking for 6+ months                                         | European  | 0.3041  | 0.1149 | 2.6461  | 8.10E-03 | 0.0195 | 0.0060 | 1.0013 | 0.0073 | 0.0071   | 0.0046 |
| Cancer diagnosed by doctor                                                 | European  | 0.2743  | 0.1047 | 2.6206  | 8.80E-03 | 0.0071 | 0.0016 | 1.0068 | 0.0068 | -0.0105  | 0.0053 |
| Illnesses of mother: None of the above (group 1)                           | European  | -0.1625 | 0.0625 | -2.5990 | 9.30E-03 | 0.0166 | 0.0018 | 1.0146 | 0.0075 | -0.0021  | 0.0053 |

| Trait                                                                          | ethnicity | rg      | SE     | z       | p        | h2_obs | se     | h2_int | se     | gcov_int | se     |
|--------------------------------------------------------------------------------|-----------|---------|--------|---------|----------|--------|--------|--------|--------|----------|--------|
| Nap during day                                                                 | European  | 0.1013  | 0.0390 | 2.5948  | 9.50E-03 | 0.0805 | 0.0036 | 1.0249 | 0.0104 | 0.0145   | 0.0065 |
| Diagnoses - main ICD10: I25 Chronic ischaemic heart disease                    | European  | 0.1599  | 0.0617 | 2.5921  | 9.50E-03 | 0.0202 | 0.0023 | 1.0190 | 0.0084 | 0.0089   | 0.0057 |
| Mineral and other dietary supplements: Selenium                                | European  | 0.2804  | 0.1084 | 2.5879  | 9.70E-03 | 0.0065 | 0.0015 | 0.9993 | 0.0075 | -0.0055  | 0.0055 |
| Non-cancer illness code self-reported: hayfever/allergic rhinitis              | European  | -0.1615 | 0.0626 | -2.5811 | 9.80E-03 | 0.0233 | 0.0025 | 1.0163 | 0.0091 | 0.0038   | 0.0060 |
| Age when periods started (menarche)                                            | European  | -0.0846 | 0.0332 | -2.5505 | 1.08E-02 | 0.2074 | 0.0103 | 1.0098 | 0.0132 | -0.0077  | 0.0057 |
| Non-cancer illness code self-reported: hypothyroidism/ myxoedema               | European  | 0.1637  | 0.0643 | 2.5471  | 1.09E-02 | 0.0510 | 0.0060 | 1.0321 | 0.0165 | 0.0006   | 0.0065 |
| Diagnoses - main ICD10: I84 Haemorrhoids                                       | European  | 0.1985  | 0.0789 | 2.5145  | 1.19E-02 | 0.0096 | 0.0017 | 1.0002 | 0.0074 | 0.0025   | 0.0049 |
| Diagnoses - main ICD10: M20 Acquired deformities of fingers and toes           | European  | 0.1979  | 0.0801 | 2.4699  | 1.35E-02 | 0.0095 | 0.0016 | 1.0005 | 0.0070 | 0.0044   | 0.0052 |
| Diagnoses - main ICD10: K60 Fissure and fistula of anal and rectal regions     | European  | 0.2451  | 0.0995 | 2.4640  | 1.37E-02 | 0.0052 | 0.0014 | 0.9839 | 0.0065 | -0.0012  | 0.0049 |
| Non-cancer illness code self-reported: rheumatoid arthritis                    | European  | 0.3255  | 0.1340 | 2.4288  | 1.51E-02 | 0.0046 | 0.0014 | 1.0060 | 0.0068 | -0.0048  | 0.0054 |
| Non-cancer illness code self-reported: migraine                                | European  | 0.1688  | 0.0698 | 2.4164  | 1.57E-02 | 0.0159 | 0.0019 | 1.0168 | 0.0083 | 0.0006   | 0.0050 |
| Diagnoses - main ICD10: N20 Calculus of kidney and ureter                      | European  | 0.2448  | 0.1013 | 2.4157  | 1.57E-02 | 0.0077 | 0.0015 | 1.0109 | 0.0071 | 0.0004   | 0.0053 |
| Why stopped smoking: Health precaution                                         | European  | -0.1716 | 0.0716 | -2.3971 | 1.65E-02 | 0.0537 | 0.0069 | 1.0006 | 0.0074 | 0.0019   | 0.0051 |
| Illnesses of father: High blood pressure                                       | European  | 0.1516  | 0.0633 | 2.3943  | 1.67E-02 | 0.0192 | 0.0019 | 1.0146 | 0.0074 | -0.0047  | 0.0053 |
| Diagnoses - main ICD10: G47 Sleep disorders                                    | European  | 0.2547  | 0.1076 | 2.3679  | 1.79E-02 | 0.0065 | 0.0014 | 0.9926 | 0.0068 | -0.0039  | 0.0057 |
| Diagnoses - main ICD10: H26 Other cataract                                     | European  | 0.2146  | 0.0906 | 2.3680  | 1.79E-02 | 0.0096 | 0.0016 | 0.9919 | 0.0075 | -0.0075  | 0.0058 |
| Diagnoses - main ICD10: I83 Varicose veins of lower extremities                | European  | 0.1683  | 0.0713 | 2.3597  | 1.83E-02 | 0.0190 | 0.0022 | 1.0356 | 0.0101 | 0.0001   | 0.0055 |
| Non-cancer illness code self-reported: kidney stone/ureter stone/bladder stone | European  | 0.2382  | 0.1010 | 2.3574  | 1.84E-02 | 0.0090 | 0.0017 | 1.0032 | 0.0080 | -0.0082  | 0.0054 |
| Diagnoses - main ICD10: J34 Other disorders of nose and nasal sinuses          | European  | 0.4584  | 0.1959 | 2.3398  | 1.93E-02 | 0.0025 | 0.0014 | 1.0070 | 0.0070 | -0.0003  | 0.0048 |
| Illnesses of mother: None of the above (group 2)                               | European  | -0.2168 | 0.0927 | -2.3385 | 1.94E-02 | 0.0093 | 0.0017 | 1.0007 | 0.0069 | -0.0091  | 0.0050 |
| Diagnoses - main ICD10: K20 Oesophagitis                                       | European  | 0.6803  | 0.2942 | 2.3126  | 2.07E-02 | 0.0018 | 0.0013 | 1.0093 | 0.0067 | 0.0031   | 0.0046 |
| Diagnoses - main ICD10: R04 Haemorrhage from respiratory passages              | European  | 0.4524  | 0.1965 | 2.3024  | 2.13E-02 | 0.0028 | 0.0015 | 0.9962 | 0.0070 | -0.0014  | 0.0055 |
| No-wear time bias adjusted acceleration standard deviation                     | European  | -0.1396 | 0.0607 | -2.3012 | 2.14E-02 | 0.0874 | 0.0082 | 1.0043 | 0.0078 | -0.0093  | 0.0049 |
| Impedance of leg (right)                                                       | European  | -0.0821 | 0.0358 | -2.2967 | 2.16E-02 | 0.2423 | 0.0103 | 1.0831 | 0.0235 | 0.0059   | 0.0080 |
| Diagnoses - main ICD10: S09 Other and unspecified injuries of head             | European  | 0.2739  | 0.1198 | 2.2865  | 2.22E-02 | 0.0041 | 0.0015 | 0.9926 | 0.0068 | -0.0044  | 0.0050 |
| Diagnoses - main ICD10: K30 Dyspepsia                                          | European  | 0.3761  | 0.1646 | 2.2845  | 2.23E-02 | 0.0029 | 0.0014 | 1.0059 | 0.0068 | -0.0002  | 0.0055 |
| Tinnitus: Yes now some of the time                                             | European  | 0.3976  | 0.1764 | 2.2532  | 2.42E-02 | 0.0076 | 0.0040 | 1.0016 | 0.0062 | -0.0077  | 0.0052 |
| Pulse wave peak to peak time                                                   | European  | -0.1755 | 0.0779 | -2.2531 | 2.43E-02 | 0.0391 | 0.0049 | 1.0110 | 0.0073 | -0.0060  | 0.0055 |
| Impedance of leg (left)                                                        | European  | -0.0804 | 0.0360 | -2.2366 | 2.53E-02 | 0.2432 | 0.0103 | 1.0734 | 0.0233 | 0.0056   | 0.0083 |
| Diagnoses - main ICD10: R69 Unknown and unspecified causes of morbidity        | European  | 0.2762  | 0.1249 | 2.2111  | 2.70E-02 | 0.0053 | 0.0013 | 0.9983 | 0.0069 | 0.0099   | 0.0055 |
| Diastolic blood pressure automated reading                                     | European  | 0.0884  | 0.0401 | 2.2059  | 2.74E-02 | 0.1354 | 0.0061 | 1.0697 | 0.0169 | 0.0001   | 0.0073 |
| Mineral and other dietary supplements: Glucosamine                             | European  | -0.1304 | 0.0592 | -2.2030 | 2.76E-02 | 0.0243 | 0.0020 | 1.0090 | 0.0075 | -0.0003  | 0.0056 |

| Trait                                                                                                                        | ethnicity | rg      | SE     | z       | p        | h2_obs | se     | h2_int | se     | gcov_int | se     |
|------------------------------------------------------------------------------------------------------------------------------|-----------|---------|--------|---------|----------|--------|--------|--------|--------|----------|--------|
| Friendships satisfaction                                                                                                     | European  | 0.1299  | 0.0590 | 2.2019  | 2.77E-02 | 0.0615 | 0.0053 | 0.9995 | 0.0077 | -0.0016  | 0.0049 |
| Illnesses of mother: High blood pressure                                                                                     | European  | 0.1148  | 0.0525 | 2.1878  | 2.87E-02 | 0.0290 | 0.0022 | 1.0209 | 0.0088 | 0.0003   | 0.0058 |
| Non-cancer illness code self-reported: muscle or soft tissue injuries                                                        | European  | 0.4007  | 0.1845 | 2.1720  | 2.99E-02 | 0.0030 | 0.0015 | 0.9956 | 0.0076 | -0.0065  | 0.0055 |
| Medication for cholesterol blood pressure or diabetes: Blood pressure medication                                             | European  | 0.1198  | 0.0553 | 2.1657  | 3.03E-02 | 0.1044 | 0.0058 | 1.0326 | 0.0105 | 0.0015   | 0.0067 |
| Diagnoses - main ICD10: N32 Other disorders of bladder                                                                       | European  | 0.2838  | 0.1310 | 2.1665  | 3.03E-02 | 0.0040 | 0.0012 | 0.9898 | 0.0060 | -0.0061  | 0.0048 |
| Diagnoses - main ICD10: R35 Polyuria                                                                                         | European  | 0.4434  | 0.2048 | 2.1649  | 3.04E-02 | 0.0030 | 0.0015 | 0.9976 | 0.0071 | -0.0039  | 0.0052 |
| Arm fat-free mass (left)                                                                                                     | European  | 0.0693  | 0.0323 | 2.1479  | 3.17E-02 | 0.2658 | 0.0116 | 1.1084 | 0.0284 | 0.0113   | 0.0075 |
| Sleep duration                                                                                                               | European  | -0.1176 | 0.0548 | -2.1471 | 3.18E-02 | 0.0704 | 0.0035 | 1.0293 | 0.0106 | -0.0185  | 0.0068 |
| Diagnoses - main ICD10: R31 Unspecified haematuria                                                                           | European  | 0.3540  | 0.1652 | 2.1427  | 3.21E-02 | 0.0028 | 0.0016 | 1.0109 | 0.0071 | 0.0011   | 0.0052 |
| Diagnoses - main ICD10: M67 Other disorders of synovium and tendon                                                           | European  | 0.5232  | 0.2449 | 2.1366  | 3.26E-02 | 0.0020 | 0.0014 | 1.0003 | 0.0069 | -0.0019  | 0.0047 |
| Diagnoses - main ICD10: M24 Other specific joint derangements                                                                | European  | 0.3154  | 0.1484 | 2.1249  | 3.36E-02 | 0.0039 | 0.0014 | 0.9852 | 0.0069 | -0.0065  | 0.0054 |
| Arm predicted mass (left)                                                                                                    | European  | 0.0683  | 0.0323 | 2.1110  | 3.48E-02 | 0.2649 | 0.0116 | 1.1106 | 0.0286 | 0.0118   | 0.0076 |
| Diagnoses - main ICD10: J22 Unspecified acute lower respiratory infection                                                    | European  | 0.3385  | 0.1605 | 2.1085  | 3.50E-02 | 0.0031 | 0.0015 | 0.9966 | 0.0075 | 0.0071   | 0.0052 |
| Frequency of heavy DIY in last 4 weeks                                                                                       | European  | 0.2175  | 0.1033 | 2.1055  | 3.53E-02 | 0.0200 | 0.0037 | 1.0102 | 0.0068 | 0.0021   | 0.0055 |
| Duration of vigorous activity                                                                                                | European  | 0.1524  | 0.0726 | 2.1004  | 3.57E-02 | 0.0362 | 0.0033 | 0.9910 | 0.0076 | 0.0091   | 0.0058 |
| Blood clot DVT bronchitis emphysema asthma rhinitis eczema allergy diagnosed by doctor: Hayfever allergic rhinitis or eczema | European  | -0.0818 | 0.0391 | -2.0941 | 3.62E-02 | 0.0730 | 0.0060 | 1.0404 | 0.0173 | 0.0098   | 0.0057 |
| Number of depression episodes                                                                                                | European  | 0.3756  | 0.1799 | 2.0884  | 3.68E-02 | 0.0319 | 0.0123 | 1.0051 | 0.0064 | 0.0020   | 0.0060 |
| Mineral and other dietary supplements: Zinc                                                                                  | European  | 0.1597  | 0.0767 | 2.0805  | 3.75E-02 | 0.0109 | 0.0015 | 0.9899 | 0.0063 | 0.0043   | 0.0051 |
| Eye problems/disorders: Diabetes related eye disease                                                                         | European  | 0.2158  | 0.1038 | 2.0796  | 3.76E-02 | 0.0195 | 0.0043 | 1.0079 | 0.0062 | 0.0070   | 0.0051 |
| Diagnoses - main ICD10: I21 Acute myocardial infarction                                                                      | European  | 0.1732  | 0.0838 | 2.0663  | 3.88E-02 | 0.0102 | 0.0016 | 1.0066 | 0.0077 | 0.0033   | 0.0048 |
| Illnesses of father: Diabetes                                                                                                | European  | 0.1579  | 0.0764 | 2.0656  | 3.89E-02 | 0.0181 | 0.0024 | 1.0293 | 0.0079 | 0.0042   | 0.0056 |
| Blood clot DVT bronchitis emphysema asthma rhinitis eczema allergy diagnosed by doctor: None of the above                    | European  | -0.0781 | 0.0380 | -2.0552 | 3.99E-02 | 0.0767 | 0.0070 | 1.0380 | 0.0186 | -0.0080  | 0.0060 |
| Diagnoses - main ICD10: K43 Ventral hernia                                                                                   | European  | 0.2176  | 0.1074 | 2.0266  | 4.27E-02 | 0.0054 | 0.0014 | 0.9927 | 0.0072 | 0.0004   | 0.0048 |
| Non-cancer illness code self-reported: type 2 diabetes                                                                       | European  | 0.2178  | 0.1075 | 2.0256  | 4.28E-02 | 0.0063 | 0.0014 | 1.0115 | 0.0069 | 0.0014   | 0.0050 |
| Maximum heart rate during fitness test                                                                                       | European  | -0.2234 | 0.1112 | -2.0094 | 4.45E-02 | 0.0697 | 0.0130 | 1.0151 | 0.0086 | 0.0086   | 0.0066 |
| Creatinine (enzymatic) in urine                                                                                              | European  | 0.0852  | 0.0426 | 2.0016  | 4.53E-02 | 0.0658 | 0.0031 | 1.0203 | 0.0097 | 0.0013   | 0.0058 |
| Diagnoses - main ICD10: I10 Essential (primary) hypertension                                                                 | European  | 0.3986  | 0.2006 | 1.9868  | 4.69E-02 | 0.0023 | 0.0013 | 0.9992 | 0.0059 | -0.0067  | 0.0053 |
| Non-cancer illness code self-reported: nasal polyps                                                                          | European  | -0.2131 | 0.1082 | -1.9703 | 4.88E-02 | 0.0050 | 0.0016 | 1.0073 | 0.0069 | 0.0032   | 0.0051 |
| Time spent driving                                                                                                           | European  | -0.1152 | 0.0600 | -1.9198 | 5.49E-02 | 0.0421 | 0.0030 | 1.0030 | 0.0076 | -0.0027  | 0.0058 |
| Diagnoses - main ICD10: K80 Cholelithiasis                                                                                   | European  | 0.1707  | 0.0891 | 1.9159  | 5.54E-02 | 0.0096 | 0.0018 | 1.0232 | 0.0090 | 0.0083   | 0.0059 |
| Non-cancer illness code self-reported: cholelithiasis/gall stones                                                            | European  | 0.1757  | 0.0921 | 1.9084  | 5.63E-02 | 0.0087 | 0.0018 | 1.0186 | 0.0086 | -0.0018  | 0.0053 |

| Trait                                                                                                           | ethnicity | rg      | SE     | z       | p        | h2_obs | se     | h2_int | se     | gcov_int | se     |
|-----------------------------------------------------------------------------------------------------------------|-----------|---------|--------|---------|----------|--------|--------|--------|--------|----------|--------|
| Birth weight of first child                                                                                     | European  | -0.0818 | 0.0451 | -1.8129 | 6.98E-02 | 0.1103 | 0.0070 | 1.0194 | 0.0099 | -0.0006  | 0.0057 |
| Ever had prostate specific antigen (PSA) test                                                                   | European  | -0.1343 | 0.0742 | -1.8113 | 7.01E-02 | 0.0347 | 0.0035 | 1.0017 | 0.0076 | 0.0004   | 0.0055 |
| Frequency of light DIY in last 4 weeks                                                                          | European  | 0.1390  | 0.0769 | 1.8070  | 7.08E-02 | 0.0229 | 0.0030 | 1.0018 | 0.0069 | -0.0044  | 0.0053 |
| Headaches for 3+ months                                                                                         | European  | 0.1367  | 0.0758 | 1.8023  | 7.15E-02 | 0.0551 | 0.0072 | 1.0080 | 0.0067 | -0.0022  | 0.0049 |
| Current employment status: Retired                                                                              | European  | -0.1669 | 0.0938 | -1.7796 | 7.51E-02 | 0.0084 | 0.0015 | 1.0163 | 0.0070 | -0.0052  | 0.0054 |
| Number of children fathered                                                                                     | European  | 0.1250  | 0.0707 | 1.7672  | 7.72E-02 | 0.0324 | 0.0036 | 1.0105 | 0.0073 | -0.0060  | 0.0052 |
| Vitamin and mineral supplements: Vitamin C                                                                      | European  | 0.1398  | 0.0791 | 1.7672  | 7.72E-02 | 0.0133 | 0.0016 | 0.9977 | 0.0072 | -0.0060  | 0.0055 |
| Hair/balding pattern: Pattern 3                                                                                 | European  | -0.0867 | 0.0504 | -1.7205 | 8.53E-02 | 0.0569 | 0.0144 | 1.0176 | 0.0205 | -0.0012  | 0.0056 |
| Arm fat-free mass (right)                                                                                       | European  | 0.0555  | 0.0323 | 1.7183  | 8.57E-02 | 0.2672 | 0.0117 | 1.1000 | 0.0288 | 0.0081   | 0.0075 |
| Arm predicted mass (right)                                                                                      | European  | 0.0548  | 0.0323 | 1.6949  | 9.01E-02 | 0.2657 | 0.0117 | 1.1030 | 0.0289 | 0.0093   | 0.0076 |
| Diagnoses - main ICD10: H25 Senile cataract                                                                     | European  | 0.2627  | 0.1551 | 1.6939  | 9.03E-02 | 0.0029 | 0.0014 | 1.0165 | 0.0071 | -0.0059  | 0.0053 |
| Basal metabolic rate                                                                                            | European  | 0.0546  | 0.0323 | 1.6903  | 9.10E-02 | 0.2852 | 0.0125 | 1.1143 | 0.0295 | 0.0100   | 0.0077 |
| Fractured bone site(s): Arm                                                                                     | European  | -0.2193 | 0.1302 | -1.6849 | 9.20E-02 | 0.0052 | 0.0015 | 0.9971 | 0.0075 | 0.0092   | 0.0055 |
| Diagnoses - main ICD10: C44 Other malignant neoplasms of skin                                                   | European  | 0.1321  | 0.0785 | 1.6830  | 9.24E-02 | 0.0104 | 0.0023 | 1.0055 | 0.0090 | -0.0074  | 0.0050 |
| Number of days/week of moderate physical activity 10+ minutes                                                   | European  | 0.1058  | 0.0629 | 1.6813  | 9.27E-02 | 0.0419 | 0.0024 | 1.0127 | 0.0077 | 0.0012   | 0.0061 |
| Number of pregnancy terminations                                                                                | European  | 0.1514  | 0.0903 | 1.6773  | 9.35E-02 | 0.0610 | 0.0103 | 1.0066 | 0.0075 | 0.0033   | 0.0054 |
| Mean time to correctly identify matches                                                                         | European  | 0.0630  | 0.0378 | 1.6688  | 9.52E-02 | 0.0721 | 0.0029 | 1.0380 | 0.0097 | -0.0056  | 0.0053 |
| Leg predicted mass (left)                                                                                       | European  | 0.0554  | 0.0334 | 1.6598  | 9.69E-02 | 0.2668 | 0.0117 | 1.1046 | 0.0267 | 0.0065   | 0.0076 |
| Leg fat-free mass (left)                                                                                        | European  | 0.0554  | 0.0334 | 1.6550  | 9.79E-02 | 0.2672 | 0.0117 | 1.1046 | 0.0268 | 0.0067   | 0.0076 |
| Reason for glasses/contact lenses: For astigmatism                                                              | European  | -0.1419 | 0.0859 | -1.6520 | 9.85E-02 | 0.0091 | 0.0016 | 1.0260 | 0.0071 | 0.0011   | 0.0051 |
| Non-cancer illness code self-reported: sleep apnoea                                                             | European  | 0.2682  | 0.1625 | 1.6506  | 9.88E-02 | 0.0027 | 0.0014 | 1.0081 | 0.0069 | 0.0012   | 0.0053 |
| Diagnoses - main ICD10: Z09 Follow-up examination after treatment for conditions other than malignant neoplasms | European  | 0.2577  | 0.1562 | 1.6499  | 9.90E-02 | 0.0027 | 0.0013 | 1.0025 | 0.0066 | 0.0046   | 0.0050 |
| Number of older siblings                                                                                        | European  | 0.5309  | 0.3223 | 1.6475  | 9.95E-02 | 0.0057 | 0.0053 | 1.0074 | 0.0064 | 0.0036   | 0.0045 |
| Diagnoses - main ICD10: M72 Fibroblastic disorders                                                              | European  | 0.1449  | 0.0888 | 1.6310  | 1.03E-01 | 0.0103 | 0.0031 | 1.0190 | 0.0220 | -0.0102  | 0.0052 |
| Home area population density - urban or rural: England/Wales - Village - less sparse                            | European  | -0.3222 | 0.2009 | -1.6033 | 1.09E-01 | 0.0021 | 0.0013 | 1.0250 | 0.0064 | -0.0075  | 0.0052 |
| Diagnoses - main ICD10: Z47 Other orthopaedic follow-up care                                                    | European  | 0.2204  | 0.1381 | 1.5958  | 1.11E-01 | 0.0032 | 0.0013 | 0.9993 | 0.0069 | 0.0025   | 0.0046 |
| Used an inhaler for chest within last hour                                                                      | European  | 0.1937  | 0.1220 | 1.5875  | 1.12E-01 | 0.0044 | 0.0015 | 1.0016 | 0.0064 | 0.0034   | 0.0050 |
| Diagnoses - main ICD10: L03 Cellulitis                                                                          | European  | 0.2090  | 0.1334 | 1.5665  | 1.17E-01 | 0.0041 | 0.0015 | 1.0017 | 0.0069 | -0.0022  | 0.0052 |
| Illnesses of father: Heart disease                                                                              | European  | 0.0858  | 0.0548 | 1.5644  | 1.18E-01 | 0.0299 | 0.0026 | 1.0044 | 0.0089 | 0.0034   | 0.0053 |
| Cough on most days                                                                                              | European  | 0.1355  | 0.0874 | 1.5512  | 1.21E-01 | 0.0486 | 0.0065 | 0.9977 | 0.0079 | 0.0069   | 0.0055 |
| Reason for reducing amount of alcohol drunk: Health precaution                                                  | European  | -0.0948 | 0.0620 | -1.5290 | 1.26E-01 | 0.0461 | 0.0047 | 0.9969 | 0.0070 | 0.0078   | 0.0050 |

| Trait                                                                                                                                                  | ethnicity | rg      | SE     | z       | p        | h2_obs | se     | h2_int | se     | gcov_int | se     |
|--------------------------------------------------------------------------------------------------------------------------------------------------------|-----------|---------|--------|---------|----------|--------|--------|--------|--------|----------|--------|
| Diagnoses - main ICD10: S66 Injury of muscle and tendon at wrist and hand level                                                                        | European  | 0.3821  | 0.2537 | 1.5058  | 1.32E-01 | 0.0015 | 0.0012 | 1.0050 | 0.0072 | -0.0033  | 0.0049 |
| Relative age voice broke                                                                                                                               | European  | -0.0750 | 0.0505 | -1.4858 | 1.37E-01 | 0.0725 | 0.0055 | 1.0101 | 0.0088 | -0.0073  | 0.0055 |
| Illnesses of mother: Alzheimer's disease/dementia                                                                                                      | European  | -0.2403 | 0.1622 | -1.4813 | 1.39E-01 | 0.0037 | 0.0048 | 1.0363 | 0.0360 | -0.0052  | 0.0053 |
| Average weekly intake of other alcoholic drinks                                                                                                        | European  | 0.3037  | 0.2058 | 1.4760  | 1.40E-01 | 0.0078 | 0.0062 | 1.0039 | 0.0066 | -0.0012  | 0.0044 |
| Non-cancer illness code self-reported: polio / poliomyelitis                                                                                           | European  | 0.2379  | 0.1613 | 1.4745  | 1.40E-01 | 0.0025 | 0.0013 | 0.9934 | 0.0067 | -0.0130  | 0.0046 |
| Frequency of other exercises in last 4 weeks                                                                                                           | European  | 0.1157  | 0.0786 | 1.4725  | 1.41E-01 | 0.0209 | 0.0033 | 0.9989 | 0.0067 | -0.0015  | 0.0052 |
| Cancer code self-reported: breast cancer                                                                                                               | European  | 0.1279  | 0.0869 | 1.4714  | 1.41E-01 | 0.0098 | 0.0018 | 1.0194 | 0.0085 | -0.0083  | 0.0054 |
| Non-accidental death in close genetic family                                                                                                           | European  | 0.1610  | 0.1095 | 1.4709  | 1.41E-01 | 0.0190 | 0.0047 | 0.9931 | 0.0066 | -0.0057  | 0.0054 |
| Reason for glasses/contact lenses: For just reading/near work as you are getting older (called presbyopia)                                             | European  | -0.2147 | 0.1462 | -1.4691 | 1.42E-01 | 0.0040 | 0.0016 | 1.1362 | 0.0085 | -0.0001  | 0.0056 |
| Reason for glasses/contact lenses: For long-sightedness i.e. for distance and near but particularly for near tasks like reading (called hypermetropia) | European  | 0.1326  | 0.0904 | 1.4665  | 1.43E-01 | 0.0095 | 0.0015 | 1.0667 | 0.0074 | 0.0010   | 0.0052 |
| Comparative body size at age 10                                                                                                                        | European  | 0.0534  | 0.0365 | 1.4609  | 1.44E-01 | 0.1456 | 0.0097 | 1.0175 | 0.0200 | -0.0135  | 0.0063 |
| Hearing aid user                                                                                                                                       | European  | 0.1217  | 0.0845 | 1.4410  | 1.50E-01 | 0.0177 | 0.0027 | 1.0018 | 0.0065 | 0.0001   | 0.0052 |
| Target heart rate achieved                                                                                                                             | European  | -0.1562 | 0.1099 | -1.4208 | 1.55E-01 | 0.0343 | 0.0109 | 1.0063 | 0.0072 | 0.0026   | 0.0054 |
| Transport type for commuting to job workplace: Walk                                                                                                    | European  | -0.1269 | 0.0905 | -1.4013 | 1.61E-01 | 0.0172 | 0.0028 | 1.0015 | 0.0071 | 0.0014   | 0.0053 |
| Diagnoses - main ICD10: T84 Complications of internal orthopaedic prosthetic devices implants and grafts                                               | European  | 0.1972  | 0.1411 | 1.3980  | 1.62E-01 | 0.0049 | 0.0017 | 0.9925 | 0.0075 | 0.0071   | 0.0057 |
| Fractured bone site(s): Ankle                                                                                                                          | European  | 0.1318  | 0.0966 | 1.3652  | 1.72E-01 | 0.0063 | 0.0015 | 0.9966 | 0.0066 | 0.0066   | 0.0049 |
| Non-cancer illness code self-reported: psoriasis                                                                                                       | European  | 0.1562  | 0.1150 | 1.3582  | 1.74E-01 | 0.0072 | 0.0016 | 1.0177 | 0.0085 | 0.0038   | 0.0056 |
| Non-cancer illness code self-reported: bladder problem (not cancer)                                                                                    | European  | 0.2291  | 0.1700 | 1.3474  | 1.78E-01 | 0.0022 | 0.0013 | 1.0022 | 0.0070 | -0.0008  | 0.0052 |
| Type of tobacco previously smoked: Cigars or pipes                                                                                                     | European  | -0.1845 | 0.1387 | -1.3305 | 1.83E-01 | 0.0114 | 0.0053 | 1.0016 | 0.0064 | -0.0025  | 0.0050 |
| Duration of fitness test                                                                                                                               | European  | -0.1938 | 0.1462 | -1.3258 | 1.85E-01 | 0.0203 | 0.0092 | 1.0044 | 0.0063 | -0.0086  | 0.0049 |
| Snoring                                                                                                                                                | European  | -0.0549 | 0.0424 | -1.2929 | 1.96E-01 | 0.0593 | 0.0030 | 1.0257 | 0.0092 | 0.0016   | 0.0056 |
| Pulse rate                                                                                                                                             | European  | 0.0646  | 0.0500 | 1.2923  | 1.96E-01 | 0.1350 | 0.0140 | 1.0260 | 0.0154 | 0.0128   | 0.0059 |
| Leg fat-free mass (right)                                                                                                                              | European  | 0.0426  | 0.0335 | 1.2727  | 2.03E-01 | 0.2653 | 0.0118 | 1.1102 | 0.0275 | 0.0060   | 0.0075 |
| Mineral and other dietary supplements: Fish oil (including cod liver oil)                                                                              | European  | -0.0873 | 0.0688 | -1.2678 | 2.05E-01 | 0.0265 | 0.0020 | 1.0084 | 0.0077 | 0.0038   | 0.0056 |
| Diagnoses - main ICD10: M25 Other joint disorders not elsewhere classified                                                                             | European  | 0.8020  | 0.6339 | 1.2653  | 2.06E-01 | 0.0010 | 0.0014 | 1.0155 | 0.0070 | -0.0001  | 0.0048 |
| Diagnoses - main ICD10: R11 Nausea and vomiting                                                                                                        | European  | 0.4468  | 0.3565 | 1.2534  | 2.10E-01 | 0.0011 | 0.0013 | 0.9951 | 0.0067 | 0.0060   | 0.0054 |
| Leg predicted mass (right)                                                                                                                             | European  | 0.0419  | 0.0336 | 1.2476  | 2.12E-01 | 0.2649 | 0.0118 | 1.1103 | 0.0275 | 0.0063   | 0.0075 |
| Length of menstrual cycle                                                                                                                              | European  | 0.1122  | 0.0899 | 1.2469  | 2.12E-01 | 0.0981 | 0.0204 | 1.0022 | 0.0071 | -0.0026  | 0.0051 |
| Pulse wave Arterial Stiffness index                                                                                                                    | European  | 0.0969  | 0.0789 | 1.2282  | 2.19E-01 | 0.0380 | 0.0051 | 1.0099 | 0.0073 | 0.0079   | 0.0054 |
| Diagnoses - main ICD10: M10 Gout                                                                                                                       | European  | 0.2341  | 0.1936 | 1.2090  | 2.27E-01 | 0.0023 | 0.0015 | 0.9997 | 0.0071 | -0.0024  | 0.0054 |



| Trait                                                                           | ethnicity | rg      | SE     | z       | p        | h2_obs | se     | h2_int | se     | gcov_int | se     |
|---------------------------------------------------------------------------------|-----------|---------|--------|---------|----------|--------|--------|--------|--------|----------|--------|
| Length of working week for main job                                             | European  | 0.1006  | 0.0837 | 1.2027  | 2.29E-01 | 0.0187 | 0.0028 | 1.0119 | 0.0067 | 0.0021   | 0.0054 |
| Diagnoses - main ICD10: M16 Coxarthrosis [arthrosis of hip]                     | European  | 0.1088  | 0.0922 | 1.1794  | 2.38E-01 | 0.0107 | 0.0018 | 1.0097 | 0.0083 | -0.0029  | 0.0054 |
| Vitamin and mineral supplements: Vitamin A                                      | European  | 0.1629  | 0.1399 | 1.1646  | 2.44E-01 | 0.0039 | 0.0015 | 1.0015 | 0.0068 | 0.0002   | 0.0055 |
| Fractured bone site(s): Wrist                                                   | European  | 0.1346  | 0.1163 | 1.1574  | 2.47E-01 | 0.0068 | 0.0017 | 1.0062 | 0.0075 | -0.0067  | 0.0056 |
| Medication for cholesterol blood pressure or diabetes: Insulin                  | European  | 0.1418  | 0.1237 | 1.1461  | 2.52E-01 | 0.0099 | 0.0034 | 1.0103 | 0.0074 | 0.0115   | 0.0047 |
| Doctor diagnosed asthma                                                         | European  | 0.0686  | 0.0604 | 1.1357  | 2.56E-01 | 0.0713 | 0.0100 | 0.9961 | 0.0085 | 0.0048   | 0.0053 |
| Started insulin within one year diagnosis of diabetes                           | European  | -0.1279 | 0.1133 | -1.1283 | 2.59E-01 | 0.1689 | 0.0492 | 1.0053 | 0.0085 | 0.0067   | 0.0057 |
| Transport type for commuting to job workplace: Car/motor vehicle                | European  | 0.0768  | 0.0690 | 1.1127  | 2.66E-01 | 0.0250 | 0.0030 | 1.0223 | 0.0070 | 0.0055   | 0.0047 |
| Mineral and other dietary supplements: None of the above                        | European  | 0.0683  | 0.0630 | 1.0844  | 2.78E-01 | 0.0293 | 0.0021 | 1.0143 | 0.0077 | -0.0015  | 0.0058 |
| Hair/balding pattern: Pattern 4                                                 | European  | -0.0406 | 0.0377 | -1.0757 | 2.82E-01 | 0.1674 | 0.0203 | 1.0994 | 0.0278 | 0.0010   | 0.0059 |
| Mouth/teeth dental problems: Mouth ulcers                                       | European  | 0.0583  | 0.0550 | 1.0603  | 2.89E-01 | 0.0289 | 0.0038 | 1.0330 | 0.0116 | -0.0017  | 0.0052 |
| Non-cancer illness code self-reported: iron deficiency anaemia                  | European  | 0.1397  | 0.1331 | 1.0494  | 2.94E-01 | 0.0040 | 0.0013 | 0.9939 | 0.0064 | 0.0004   | 0.0049 |
| Diagnoses - main ICD10: E04 Other non-toxic goitre                              | European  | 0.1128  | 0.1086 | 1.0385  | 2.99E-01 | 0.0049 | 0.0014 | 0.9946 | 0.0070 | -0.0053  | 0.0051 |
| Number of days/weekwalked 10+ minutes                                           | European  | 0.0501  | 0.0483 | 1.0377  | 2.99E-01 | 0.0421 | 0.0023 | 1.0110 | 0.0078 | -0.0028  | 0.0055 |
| Duration of other exercises                                                     | European  | -0.0918 | 0.0904 | -1.0156 | 3.10E-01 | 0.0189 | 0.0031 | 1.0085 | 0.0070 | 0.0034   | 0.0054 |
| Average weekly spirits intake                                                   | European  | 0.0609  | 0.0604 | 1.0086  | 3.13E-01 | 0.0316 | 0.0028 | 1.0169 | 0.0081 | 0.0100   | 0.0055 |
| Heel bone mineral density (BMD)T-score automated (right)                        | European  | 0.0503  | 0.0500 | 1.0044  | 3.15E-01 | 0.3033 | 0.0358 | 1.0288 | 0.0237 | -0.0105  | 0.0075 |
| Handedness (chirality/laterality): Use both right and left hands equally        | European  | 0.1206  | 0.1208 | 0.9988  | 3.18E-01 | 0.0042 | 0.0014 | 1.0055 | 0.0067 | 0.0039   | 0.0048 |
| Non-cancer illness code self-reported: pneumothorax                             | European  | -0.1394 | 0.1405 | -0.9926 | 3.21E-01 | 0.0031 | 0.0015 | 0.9870 | 0.0070 | -0.0004  | 0.0054 |
| Illnesses of mother: Breast cancer                                              | European  | -0.0761 | 0.0768 | -0.9916 | 3.21E-01 | 0.0094 | 0.0020 | 1.0071 | 0.0086 | -0.0044  | 0.0046 |
| Heel bone mineral density (BMD)T-score automated                                | European  | 0.0411  | 0.0432 | 0.9519  | 3.41E-01 | 0.2947 | 0.0335 | 1.0842 | 0.0378 | -0.0106  | 0.0082 |
| Non-cancer illness code self-reported: allergy or anaphylactic reaction to drug | European  | 0.4606  | 0.4873 | 0.9452  | 3.45E-01 | 0.0009 | 0.0013 | 1.0090 | 0.0065 | -0.0052  | 0.0053 |
| Diagnoses - main ICD10: F43 Reaction to severe stress and adjustment disorders  | European  | 0.5047  | 0.5390 | 0.9363  | 3.49E-01 | 0.0008 | 0.0013 | 1.0026 | 0.0060 | 0.0015   | 0.0049 |
| Eye problems/disorders: Glaucoma                                                | European  | 0.0708  | 0.0761 | 0.9303  | 3.52E-01 | 0.0398 | 0.0055 | 1.0169 | 0.0081 | -0.0091  | 0.0057 |
| Vitamin and mineral supplements: Vitamin E                                      | European  | 0.0872  | 0.0943 | 0.9246  | 3.55E-01 | 0.0070 | 0.0014 | 0.9925 | 0.0063 | 0.0077   | 0.0052 |
| Non-cancer illness code self-reported: retinal detachment                       | European  | -0.1586 | 0.1748 | -0.9070 | 3.64E-01 | 0.0031 | 0.0014 | 1.0057 | 0.0066 | 0.0010   | 0.0057 |
| Non-cancer illness code self-reported: ulcerative colitis                       | European  | -0.0977 | 0.1083 | -0.9024 | 3.67E-01 | 0.0058 | 0.0017 | 1.0119 | 0.0080 | 0.0082   | 0.0049 |
| Vitamin and mineral supplements: None of the above                              | European  | -0.0497 | 0.0552 | -0.9010 | 3.68E-01 | 0.0301 | 0.0018 | 0.9941 | 0.0070 | -0.0042  | 0.0055 |
| Vitamin and mineral supplements: Vitamin D                                      | European  | -0.0948 | 0.1073 | -0.8832 | 3.77E-01 | 0.0062 | 0.0016 | 0.9967 | 0.0074 | 0.0030   | 0.0053 |
| Ever taken oral contraceptive pill                                              | European  | 0.0683  | 0.0778 | 0.8787  | 3.80E-01 | 0.0199 | 0.0030 | 1.0101 | 0.0073 | 0.0010   | 0.0051 |
| Non-cancer illness code self-reported: vaginal prolapse/ uterine prolapse       | European  | 0.1210  | 0.1391 | 0.8698  | 3.84E-01 | 0.0045 | 0.0016 | 1.0072 | 0.0072 | 0.0050   | 0.0050 |
| Tinnitus: Yes now most or all of the time                                       | European  | 0.0657  | 0.0756 | 0.8696  | 3.85E-01 | 0.0334 | 0.0049 | 1.0019 | 0.0070 | 0.0020   | 0.0053 |

| Trait                                                                                 | ethnicity | rg      | SE     | z       | p        | h2_obs | se     | h2_int | se     | gcov_int | se     |
|---------------------------------------------------------------------------------------|-----------|---------|--------|---------|----------|--------|--------|--------|--------|----------|--------|
| Diagnoses - main ICD10: Z80 Family history of malignant neoplasm                      | European  | 0.2136  | 0.2457 | 0.8691  | 3.85E-01 | 0.0014 | 0.0014 | 0.9902 | 0.0063 | -0.0079  | 0.0055 |
| Diagnoses - main ICD10: K40 Inguinal hernia                                           | European  | -0.0618 | 0.0720 | -0.8577 | 3.91E-01 | 0.0184 | 0.0024 | 0.9916 | 0.0079 | -0.0012  | 0.0056 |
| Whole body water mass                                                                 | European  | 0.0269  | 0.0316 | 0.8517  | 3.94E-01 | 0.2901 | 0.0131 | 1.1260 | 0.0314 | 0.0100   | 0.0077 |
| Whole body fat-free mass                                                              | European  | 0.0261  | 0.0316 | 0.8254  | 4.09E-01 | 0.2900 | 0.0132 | 1.1273 | 0.0315 | 0.0096   | 0.0077 |
| Diagnoses - main ICD10: K35 Acute appendicitis                                        | European  | -0.1338 | 0.1657 | -0.8074 | 4.20E-01 | 0.0023 | 0.0013 | 1.0040 | 0.0066 | 0.0056   | 0.0051 |
| Systolic blood pressure automated reading                                             | European  | 0.0333  | 0.0418 | 0.7956  | 4.26E-01 | 0.1273 | 0.0060 | 1.0680 | 0.0172 | -0.0066  | 0.0066 |
| Non-cancer illness code self-reported: mania/bipolar disorder/manic depression        | European  | 0.0799  | 0.1014 | 0.7886  | 4.30E-01 | 0.0058 | 0.0013 | 0.9992 | 0.0061 | 0.0015   | 0.0054 |
| Non-cancer illness code self-reported: bone disorder                                  | European  | -0.1768 | 0.2285 | -0.7735 | 4.39E-01 | 0.0013 | 0.0012 | 1.0072 | 0.0065 | 0.0095   | 0.0050 |
| Non-cancer illness code self-reported: hypopituitarism                                | European  | -0.1922 | 0.2489 | -0.7721 | 4.40E-01 | 0.0013 | 0.0012 | 0.9925 | 0.0064 | 0.0075   | 0.0054 |
| Diagnoses - main ICD10: B37 Candidiasis                                               | European  | 0.5039  | 0.6531 | 0.7715  | 4.40E-01 | 0.0007 | 0.0014 | 1.0007 | 0.0066 | -0.0030  | 0.0045 |
| Non-cancer illness code self-reported: enlarged prostate                              | European  | 0.0732  | 0.0959 | 0.7632  | 4.45E-01 | 0.0063 | 0.0016 | 1.0036 | 0.0069 | -0.0007  | 0.0050 |
| Morning/evening person (chronotype)                                                   | European  | 0.0299  | 0.0394 | 0.7594  | 4.48E-01 | 0.1149 | 0.0044 | 1.0483 | 0.0125 | 0.0000   | 0.0060 |
| Diagnoses - main ICD10: C50 Malignant neoplasm of breast                              | European  | 0.0683  | 0.0900 | 0.7594  | 4.48E-01 | 0.0085 | 0.0016 | 1.0058 | 0.0081 | -0.0058  | 0.0051 |
| Eye problems/disorders: Cataract                                                      | European  | 0.0740  | 0.0982 | 0.7533  | 4.51E-01 | 0.0231 | 0.0044 | 1.0138 | 0.0069 | 0.0004   | 0.0055 |
| Heel bone mineral density (BMD)T-score automated (left)                               | European  | 0.0373  | 0.0497 | 0.7494  | 4.54E-01 | 0.3011 | 0.0355 | 1.0309 | 0.0231 | -0.0071  | 0.0078 |
| Diagnoses - main ICD10: C61 Malignant neoplasm of prostate                            | European  | 0.0838  | 0.1122 | 0.7474  | 4.55E-01 | 0.0043 | 0.0015 | 1.0191 | 0.0073 | -0.0066  | 0.0050 |
| Non-cancer illness code self-reported: joint disorder                                 | European  | 0.1276  | 0.1715 | 0.7442  | 4.57E-01 | 0.0020 | 0.0013 | 0.9925 | 0.0061 | -0.0003  | 0.0047 |
| Non-cancer illness code self-reported: gout                                           | European  | 0.0431  | 0.0580 | 0.7437  | 4.57E-01 | 0.0248 | 0.0069 | 0.9921 | 0.0208 | -0.0028  | 0.0049 |
| Cancer code self-reported: squamous cell carcinoma                                    | European  | 0.1221  | 0.1647 | 0.7410  | 4.59E-01 | 0.0022 | 0.0013 | 0.9991 | 0.0068 | -0.0047  | 0.0049 |
| Had menopause                                                                         | European  | 0.0677  | 0.0930 | 0.7276  | 4.67E-01 | 0.0201 | 0.0041 | 1.0051 | 0.0071 | -0.0022  | 0.0059 |
| Relative age of first facial hair                                                     | European  | -0.0291 | 0.0423 | -0.6883 | 4.91E-01 | 0.1255 | 0.0074 | 1.0407 | 0.0119 | -0.0109  | 0.0056 |
| Diagnoses - main ICD10: N40 Hyperplasia of prostate                                   | European  | 0.0651  | 0.0958 | 0.6801  | 4.96E-01 | 0.0061 | 0.0015 | 1.0085 | 0.0068 | -0.0027  | 0.0048 |
| Diagnoses - main ICD10: K76 Other diseases of liver                                   | European  | 0.0972  | 0.1435 | 0.6770  | 4.98E-01 | 0.0035 | 0.0013 | 0.9940 | 0.0068 | 0.0049   | 0.0051 |
| Diagnoses - main ICD10: M70 Soft tissue disorders related to use overuse and pressure | European  | 0.0780  | 0.1164 | 0.6699  | 5.03E-01 | 0.0041 | 0.0013 | 0.9815 | 0.0067 | -0.0023  | 0.0046 |
| Non-cancer illness code self-reported: vitiligo                                       | European  | 0.1642  | 0.2531 | 0.6488  | 5.17E-01 | 0.0011 | 0.0014 | 0.9975 | 0.0071 | 0.0027   | 0.0051 |
| Distance between home and job workplace                                               | European  | -0.0794 | 0.1234 | -0.6433 | 5.20E-01 | 0.0124 | 0.0032 | 1.0050 | 0.0064 | -0.0033  | 0.0054 |
| Non-cancer illness code self-reported: pernicious anaemia                             | European  | 0.0862  | 0.1351 | 0.6383  | 5.23E-01 | 0.0037 | 0.0013 | 0.9902 | 0.0067 | 0.0029   | 0.0053 |
| Diagnoses - main ICD10: I30 Acute pericarditis                                        | European  | 0.1125  | 0.1791 | 0.6285  | 5.30E-01 | 0.0022 | 0.0015 | 0.9951 | 0.0069 | -0.0028  | 0.0053 |
| Number of days/week of vigorous physical activity 10+ minutes                         | European  | 0.0337  | 0.0541 | 0.6238  | 5.33E-01 | 0.0378 | 0.0023 | 1.0166 | 0.0079 | -0.0005  | 0.0057 |
| Non-cancer illness code self-reported: varicose veins                                 | European  | -0.0696 | 0.1136 | -0.6128 | 5.40E-01 | 0.0046 | 0.0014 | 1.0092 | 0.0067 | 0.0011   | 0.0050 |
| Alcohol drinker status: Never                                                         | European  | 0.0422  | 0.0726 | 0.5813  | 5.61E-01 | 0.0142 | 0.0017 | 1.0173 | 0.0076 | 0.0097   | 0.0052 |
| Duration of strenuous sports                                                          | European  | 0.0793  | 0.1381 | 0.5746  | 5.66E-01 | 0.0315 | 0.0137 | 0.9937 | 0.0065 | 0.0028   | 0.0049 |

| Trait                                                                           | ethnicity | rg      | SE     | z       | p        | h2_obs | se     | h2_int | se     | gcov_int | se     |
|---------------------------------------------------------------------------------|-----------|---------|--------|---------|----------|--------|--------|--------|--------|----------|--------|
| Fracture resulting from simple fall                                             | European  | -0.0606 | 0.1061 | -0.5708 | 5.68E-01 | 0.0534 | 0.0145 | 0.9914 | 0.0065 | -0.0028  | 0.0051 |
| Cancer code self-reported: small intestine/small bowel cancer                   | European  | 0.1324  | 0.2407 | 0.5503  | 5.82E-01 | 0.0011 | 0.0014 | 0.9992 | 0.0067 | 0.0018   | 0.0052 |
| Why stopped smoking: None of the above                                          | European  | -0.0439 | 0.0799 | -0.5494 | 5.83E-01 | 0.0403 | 0.0062 | 0.9976 | 0.0068 | 0.0007   | 0.0054 |
| Illnesses of father: Prostate cancer                                            | European  | -0.0464 | 0.0897 | -0.5172 | 6.05E-01 | 0.0084 | 0.0018 | 1.0124 | 0.0085 | -0.0021  | 0.0051 |
| Diagnoses - main ICD10: R14 Flatulence and related conditions                   | European  | 0.0679  | 0.1320 | 0.5142  | 6.07E-01 | 0.0035 | 0.0012 | 0.9897 | 0.0068 | 0.0028   | 0.0051 |
| Non-cancer illness code self-reported: arthritis (nos)                          | European  | 0.0930  | 0.1827 | 0.5087  | 6.11E-01 | 0.0019 | 0.0014 | 1.0136 | 0.0065 | 0.0034   | 0.0052 |
| Diagnoses - main ICD10: D25 Leiomyoma of uterus                                 | European  | 0.0578  | 0.1157 | 0.4998  | 6.17E-01 | 0.0058 | 0.0014 | 0.9940 | 0.0065 | 0.0017   | 0.0053 |
| Father still alive                                                              | European  | -0.0494 | 0.0996 | -0.4955 | 6.20E-01 | 0.0065 | 0.0015 | 1.0157 | 0.0070 | 0.0064   | 0.0051 |
| Reproducibility of spirometry measurement using ERS/ATS criteria                | European  | -0.0490 | 0.0998 | -0.4910 | 6.23E-01 | 0.0144 | 0.0023 | 1.0077 | 0.0073 | 0.0102   | 0.0058 |
| Hair/balding pattern: Pattern 2                                                 | European  | -0.0281 | 0.0577 | -0.4879 | 6.26E-01 | 0.0516 | 0.0062 | 1.0348 | 0.0141 | 0.0112   | 0.0055 |
| Non-cancer illness code self-reported: malabsorption/ coeliac disease           | European  | 0.0573  | 0.1212 | 0.4725  | 6.37E-01 | 0.0171 | 0.0123 | 0.9933 | 0.0226 | -0.0009  | 0.0052 |
| Diagnoses - main ICD10: I80 Phlebitis and thrombophlebitis                      | European  | 0.0427  | 0.0940 | 0.4540  | 6.50E-01 | 0.0083 | 0.0016 | 0.9924 | 0.0085 | -0.0011  | 0.0049 |
| Birth weight                                                                    | European  | -0.0189 | 0.0417 | -0.4528 | 6.51E-01 | 0.1089 | 0.0067 | 1.0501 | 0.0139 | -0.0033  | 0.0065 |
| Cancer code self-reported: lung cancer                                          | European  | 0.7446  | 1.6579 | 0.4491  | 6.53E-01 | 0.0003 | 0.0012 | 0.9935 | 0.0067 | -0.0075  | 0.0048 |
| Diagnoses - main ICD10: K51 Ulcerative colitis                                  | European  | -0.0469 | 0.1048 | -0.4472 | 6.55E-01 | 0.0045 | 0.0016 | 1.0147 | 0.0073 | 0.0071   | 0.0046 |
| Non-cancer illness code self-reported: hypertrophic cardiomyopathy (hcm / hocm) | European  | 0.0986  | 0.2211 | 0.4462  | 6.56E-01 | 0.0013 | 0.0013 | 1.0033 | 0.0068 | -0.0042  | 0.0048 |
| Diagnoses - main ICD10: K50 Crohn's disease [regional enteritis]                | European  | 0.0521  | 0.1216 | 0.4283  | 6.68E-01 | 0.0042 | 0.0014 | 1.0044 | 0.0069 | 0.0021   | 0.0051 |
| Pulse wave reflection index                                                     | European  | -0.0290 | 0.0697 | -0.4158 | 6.78E-01 | 0.0539 | 0.0055 | 1.0103 | 0.0077 | -0.0010  | 0.0053 |
| Cancer code self-reported: prostate cancer                                      | European  | 0.0389  | 0.0982 | 0.3962  | 6.92E-01 | 0.0061 | 0.0016 | 1.0146 | 0.0082 | -0.0103  | 0.0056 |
| Vitamin and mineral supplements: Multivitamins +/- minerals                     | European  | 0.0202  | 0.0593 | 0.3409  | 7.33E-01 | 0.0237 | 0.0017 | 1.0070 | 0.0074 | 0.0067   | 0.0053 |
| Types of transport used (excluding work): Public transport                      | European  | -0.0221 | 0.0673 | -0.3280 | 7.43E-01 | 0.0223 | 0.0017 | 1.0252 | 0.0067 | -0.0047  | 0.0057 |
| Time spent using computer                                                       | European  | -0.0138 | 0.0422 | -0.3268 | 7.44E-01 | 0.0949 | 0.0043 | 1.0504 | 0.0105 | -0.0023  | 0.0066 |
| Handedness (chirality/laterality): Left-handed                                  | European  | -0.0287 | 0.0880 | -0.3265 | 7.44E-01 | 0.0098 | 0.0017 | 1.0055 | 0.0073 | -0.0013  | 0.0055 |
| Diagnoses - main ICD10: D12 Benign neoplasm of colon rectum anus and anal canal | European  | -0.0293 | 0.0915 | -0.3197 | 7.49E-01 | 0.0085 | 0.0015 | 1.0042 | 0.0067 | 0.0091   | 0.0048 |
| Underlying (primary) cause of death: ICD10: E85.4 Organ-limited amyloidosis     | European  | -0.0722 | 0.2802 | -0.2575 | 7.97E-01 | 0.0429 | 0.0598 | 1.0028 | 0.0073 | 0.0098   | 0.0050 |
| Non-cancer illness code self-reported: uterine fibroids                         | European  | -0.0241 | 0.0961 | -0.2506 | 8.02E-01 | 0.0069 | 0.0015 | 1.0090 | 0.0068 | 0.0008   | 0.0052 |
| Ever had bowel cancer screening                                                 | European  | 0.0190  | 0.0763 | 0.2487  | 8.04E-01 | 0.0131 | 0.0016 | 1.0195 | 0.0073 | 0.0072   | 0.0057 |
| Non-cancer illness code self-reported: glaucoma                                 | European  | 0.0188  | 0.0790 | 0.2381  | 8.12E-01 | 0.0116 | 0.0017 | 1.0106 | 0.0079 | -0.0049  | 0.0054 |
| Potassium in urine                                                              | European  | 0.0123  | 0.0525 | 0.2334  | 8.15E-01 | 0.0431 | 0.0024 | 1.0152 | 0.0091 | -0.0023  | 0.0058 |
| Mineral and other dietary supplements: Calcium                                  | European  | -0.0164 | 0.0705 | -0.2325 | 8.16E-01 | 0.0122 | 0.0016 | 0.9995 | 0.0070 | -0.0004  | 0.0046 |
| Non-cancer illness code self-reported: hyperthyroidism/ thyrotoxicosis          | European  | 0.0214  | 0.0996 | 0.2153  | 8.30E-01 | 0.0087 | 0.0026 | 1.0062 | 0.0084 | 0.0002   | 0.0053 |

| Trait                                                                                                    | ethnicity | rg      | SE     | z       | p        | h2_obs | se     | h2_int | se     | gcov_int | se     |
|----------------------------------------------------------------------------------------------------------|-----------|---------|--------|---------|----------|--------|--------|--------|--------|----------|--------|
| Diagnoses - main ICD10: O75 Other complications of labour and delivery not elsewhere classified          | European  | -0.0307 | 0.1436 | -0.2134 | 8.31E-01 | 0.0026 | 0.0012 | 0.9911 | 0.0056 | -0.0009  | 0.0047 |
| Non-cancer illness code self-reported: eczema/dermatitis                                                 | European  | -0.0212 | 0.1015 | -0.2094 | 8.34E-01 | 0.0083 | 0.0021 | 1.0154 | 0.0073 | 0.0052   | 0.0057 |
| Doctor diagnosed hayfever or allergic rhinitis                                                           | European  | -0.0109 | 0.0607 | -0.1803 | 8.57E-01 | 0.0804 | 0.0092 | 1.0055 | 0.0084 | 0.0035   | 0.0051 |
| Non-cancer illness code self-reported: osteoporosis                                                      | European  | 0.0153  | 0.0890 | 0.1717  | 8.64E-01 | 0.0147 | 0.0020 | 1.0019 | 0.0083 | 0.0061   | 0.0058 |
| Non-cancer illness code self-reported: ankylosing spondylitis                                            | European  | 0.0255  | 0.2001 | 0.1273  | 8.99E-01 | 0.0016 | 0.0015 | 1.0034 | 0.0070 | 0.0105   | 0.0051 |
| Illness injury bereavement stress in last 2 years: Serious illness injury or assault of a close relative | European  | 0.0116  | 0.0957 | 0.1207  | 9.04E-01 | 0.0112 | 0.0017 | 1.0104 | 0.0073 | 0.0055   | 0.0058 |
| Underlying (primary) cause of death: ICD10: J84.1 Other interstitial pulmonary diseases with fibrosis    | European  | 0.0172  | 0.1515 | 0.1134  | 9.10E-01 | 0.1133 | 0.0611 | 0.9914 | 0.0064 | -0.0040  | 0.0050 |
| Cancer code self-reported: basal cell carcinoma                                                          | European  | 0.0084  | 0.0795 | 0.1056  | 9.16E-01 | 0.0103 | 0.0019 | 0.9981 | 0.0077 | -0.0014  | 0.0053 |
| Diagnoses - main ICD10: J33 Nasal polyp                                                                  | European  | -0.0108 | 0.1309 | -0.0827 | 9.34E-01 | 0.0035 | 0.0015 | 1.0057 | 0.0075 | 0.0022   | 0.0051 |
| Diagnoses - main ICD10: N19 Unspecified renal failure                                                    | European  | -0.0121 | 0.1565 | -0.0775 | 9.38E-01 | 0.0031 | 0.0013 | 0.9988 | 0.0068 | -0.0004  | 0.0053 |
| Non-cancer illness code self-reported: crohn's disease                                                   | European  | 0.0068  | 0.1258 | 0.0540  | 9.57E-01 | 0.0049 | 0.0015 | 1.0076 | 0.0068 | 0.0029   | 0.0056 |
| Diagnoses - main ICD10: F31 Bipolar affective disorder                                                   | European  | 0.0052  | 0.1029 | 0.0506  | 9.60E-01 | 0.0051 | 0.0015 | 0.9860 | 0.0072 | 0.0025   | 0.0051 |
| Diagnoses - main ICD10: S52 Fracture of forearm                                                          | European  | 0.0056  | 0.1303 | 0.0430  | 9.66E-01 | 0.0065 | 0.0018 | 0.9989 | 0.0074 | -0.0044  | 0.0058 |
| Trunk fat-free mass                                                                                      | European  | 0.0010  | 0.0305 | 0.0315  | 9.75E-01 | 0.2876 | 0.0136 | 1.1352 | 0.0331 | 0.0109   | 0.0077 |
| Diagnoses - main ICD10: I48 Atrial fibrillation and flutter                                              | European  | 0.0021  | 0.0778 | 0.0271  | 9.78E-01 | 0.0130 | 0.0020 | 1.0099 | 0.0080 | 0.0053   | 0.0050 |
| Cancer code self-reported: malignant melanoma                                                            | European  | 0.0030  | 0.1151 | 0.0262  | 9.79E-01 | 0.0051 | 0.0017 | 0.9930 | 0.0066 | -0.0063  | 0.0050 |
| Trunk predicted mass                                                                                     | European  | 0.0008  | 0.0305 | 0.0250  | 9.80E-01 | 0.2860 | 0.0135 | 1.1346 | 0.0329 | 0.0108   | 0.0077 |
| Diagnoses - main ICD10: S76 Injury of muscle and tendon at hip and thigh level                           | European  | 0.0027  | 0.1992 | 0.0137  | 9.89E-01 | 0.0013 | 0.0012 | 0.9993 | 0.0066 | -0.0009  | 0.0048 |
| Most recent bowel cancer screening                                                                       | European  | 0.0004  | 0.1395 | 0.0026  | 9.98E-01 | 0.0116 | 0.0064 | 1.0119 | 0.0066 | 0.0037   | 0.0045 |

**eTable 6.** Genetic correlations for “prevalence” Design

All results from LDhub analyses. Trait= trait against which genetic correlation was calculated. PMID= PMID for publication that belongs to tested summary statistics. rG= genetic correlation. SE= standard error for genetic correlation. Z= Z-score. p= P-value for genetic correlation analysis. ethnicity= sample ethnicity for sample referenced in “Trait” column. h2\_obs= Heritability on the observed scale for sample referenced in “Trait”. se= standard errors for variable reported in the cell to the left (i.e. h2\_obs, ht\_int, gcov\_int). h2\_int= LD score intercept for sample referenced in “Trait”. gcov\_int= cross-trait LD Score regression intercept.

| Trait                                            | PMID     | Category          | rg      | SE     | z       | p        | ethnicity | h2_obs | se     | h2_int | se     | gcov_int | se     |
|--------------------------------------------------|----------|-------------------|---------|--------|---------|----------|-----------|--------|--------|--------|--------|----------|--------|
| Age of first birth                               | 27798627 | reproductive      | -0.5374 | 0.0542 | -9.9126 | 3.67E-23 | European  | 0.0624 | 0.0036 | 0.9535 | 0.0083 | -0.0020  | 0.0061 |
| Depressive symptoms                              | 27089181 | psychiatric       | 0.7589  | 0.0838 | 9.0541  | 1.38E-19 | European  | 0.0468 | 0.0040 | 1.0025 | 0.0076 | -0.0026  | 0.0060 |
| Years of schooling 2016                          | 27225129 | education         | -0.3694 | 0.0409 | -9.0409 | 1.55E-19 | European  | 0.1247 | 0.0046 | 0.9381 | 0.0108 | -0.0076  | 0.0064 |
| Schizophrenia                                    | 25056061 | psychiatric       | 0.3282  | 0.0452 | 7.2671  | 3.67E-13 | Mixed     | 0.4529 | 0.0198 | 1.0610 | 0.0133 | 0.0073   | 0.0072 |
| Intelligence                                     | 28530673 | cognitive         | -0.3014 | 0.0436 | -6.9187 | 4.56E-12 | European  | 0.1882 | 0.0106 | 1.0104 | 0.0088 | 0.0024   | 0.0049 |
| PGC cross-disorder analysis                      | 23453885 | psychiatric       | 0.4379  | 0.0663 | 6.6056  | 3.96E-11 | European  | 0.1715 | 0.0130 | 1.0156 | 0.0117 | 0.0038   | 0.0073 |
| College completion                               | 23722424 | education         | -0.3624 | 0.0588 | -6.1629 | 7.14E-10 | European  | 0.0785 | 0.0057 | 1.0230 | 0.0087 | 0.0022   | 0.0060 |
| Insomnia                                         | 28604731 | sleeping          | 0.4609  | 0.0771 | 5.9795  | 2.24E-09 | European  | 0.0475 | 0.0051 | 1.0031 | 0.0070 | -0.0017  | 0.0051 |
| Subjective well being                            | 27089181 | psychiatric       | -0.4389 | 0.0744 | -5.8980 | 3.68E-09 | European  | 0.0248 | 0.0020 | 1.0031 | 0.0073 | 0.0005   | 0.0058 |
| Years of schooling (proxy cognitive performance) | 25201988 | education         | -0.3390 | 0.0577 | -5.8696 | 4.37E-09 | European  | 0.1059 | 0.0076 | 1.0287 | 0.0093 | -0.0069  | 0.0061 |
| Major depressive disorder                        | 22472876 | psychiatric       | 0.6075  | 0.1047 | 5.8016  | 6.57E-09 | European  | 0.1508 | 0.0263 | 1.0137 | 0.0065 | 0.0035   | 0.0055 |
| Years of schooling 2013                          | 23722424 | education         | -0.3461 | 0.0598 | -5.7874 | 7.15E-09 | European  | 0.0836 | 0.0062 | 1.0207 | 0.0091 | -0.0047  | 0.0063 |
| Neuroticism                                      | 27089181 | personality       | 0.4972  | 0.0940 | 5.2889  | 1.23E-07 | European  | 0.0896 | 0.0082 | 0.9886 | 0.0134 | 0.0004   | 0.0075 |
| Number of children ever born                     | 27798627 | reproductive      | 0.3328  | 0.0653 | 5.0994  | 3.41E-07 | European  | 0.0254 | 0.0019 | 0.9718 | 0.0072 | -0.0124  | 0.0053 |
| Insomnia                                         | 27992416 | sleeping          | 0.3858  | 0.0777 | 4.9630  | 6.94E-07 | European  | 0.1341 | 0.0118 | 1.0019 | 0.0081 | -0.0001  | 0.0057 |
| Ever vs never smoked                             | 20418890 | smoking behaviour | 0.3246  | 0.0721 | 4.5053  | 6.63E-06 | European  | 0.0726 | 0.0067 | 1.0005 | 0.0062 | 0.0019   | 0.0049 |
| Cigarettes smoked per day                        | 20418890 | smoking behaviour | 0.4714  | 0.1066 | 4.4239  | 9.69E-06 | European  | 0.0576 | 0.0155 | 1.0063 | 0.0068 | -0.0031  | 0.0047 |
| Mothers age at death                             | 27015805 | aging             | -0.4738 | 0.1116 | -4.2455 | 2.18E-05 | European  | 0.0375 | 0.0071 | 1.0100 | 0.0072 | 0.0022   | 0.0054 |
| Childhood IQ                                     | 23358156 | education         | -0.3863 | 0.0943 | -4.0953 | 4.22E-05 | European  | 0.2722 | 0.0453 | 1.0025 | 0.0093 | -0.0047  | 0.0061 |
| Age at Menarche                                  | 25231870 | reproductive      | -0.1860 | 0.0456 | -4.0786 | 4.53E-05 | European  | 0.2057 | 0.0105 | 0.9457 | 0.0120 | 0.0016   | 0.0068 |
| Neuroticism                                      | 24828478 | personality       | 0.5151  | 0.1288 | 3.9998  | 6.34E-05 | European  | 0.0131 | 0.0033 | 1.0142 | 0.0070 | 0.0010   | 0.0048 |

| Trait                                            | PMID     | Category        | rg      | SE     | z       | p        | ethnicity | h2_obs | se     | h2_int | se     | gcov_int | se     |
|--------------------------------------------------|----------|-----------------|---------|--------|---------|----------|-----------|--------|--------|--------|--------|----------|--------|
| Coronary artery disease                          | 26343387 | cardiometabolic | 0.1772  | 0.0448 | 3.9567  | 7.60E-05 | Mixed     | 0.0782 | 0.0057 | 1.0484 | 0.0096 | 0.0108   | 0.0054 |
| Overweight                                       | 23563607 | anthropometric  | 0.1998  | 0.0506 | 3.9453  | 7.97E-05 | European  | 0.1097 | 0.0067 | 1.0242 | 0.0098 | -0.0067  | 0.0061 |
| Lung cancer                                      | 27488534 | cancer          | 0.3578  | 0.0935 | 3.8254  | 1.00E-04 | European  | 0.3204 | 0.0675 | 1.0132 | 0.0082 | -0.0054  | 0.0054 |
| Lung cancer (all)                                | 24880342 | cancer          | 0.3811  | 0.0996 | 3.8270  | 1.00E-04 | European  | 0.1273 | 0.0307 | 1.0079 | 0.0082 | -0.0031  | 0.0051 |
| Body fat                                         | 26833246 | anthropometric  | 0.2268  | 0.0609 | 3.7216  | 2.00E-04 | Mixed     | 0.1075 | 0.0083 | 0.9040 | 0.0069 | -0.0050  | 0.0056 |
| Body mass index                                  | 20935630 | anthropometric  | 0.1507  | 0.0403 | 3.7419  | 2.00E-04 | European  | 0.1904 | 0.0095 | 1.0091 | 0.0106 | 0.0050   | 0.0064 |
| Obesity class 3                                  | 23563607 | anthropometric  | 0.2765  | 0.0744 | 3.7146  | 2.00E-04 | European  | 0.1219 | 0.0150 | 0.9798 | 0.0095 | 0.0003   | 0.0066 |
| Excessive daytime sleepiness                     | 27992416 | sleeping        | 0.2462  | 0.0694 | 3.5463  | 4.00E-04 | European  | 0.0536 | 0.0049 | 1.0039 | 0.0072 | -0.0020  | 0.0055 |
| Obesity class 1                                  | 23563607 | anthropometric  | 0.1660  | 0.0465 | 3.5689  | 4.00E-04 | European  | 0.2171 | 0.0123 | 1.0186 | 0.0108 | 0.0075   | 0.0068 |
| Obesity class 2                                  | 23563607 | anthropometric  | 0.1966  | 0.0555 | 3.5431  | 4.00E-04 | European  | 0.1835 | 0.0134 | 1.0033 | 0.0102 | 0.0055   | 0.0072 |
| Bipolar disorder                                 | 21926972 | psychiatric     | 0.2403  | 0.0692 | 3.4742  | 5.00E-04 | European  | 0.4177 | 0.0390 | 1.0281 | 0.0084 | -0.0001  | 0.0051 |
| Waist-to-hip ratio                               | 25673412 | anthropometric  | 0.1565  | 0.0449 | 3.4884  | 5.00E-04 | European  | 0.1140 | 0.0073 | 0.9183 | 0.0095 | 0.0083   | 0.0055 |
| Parents age at death                             | 27015805 | aging           | -0.3660 | 0.1115 | -3.2835 | 1.00E-03 | European  | 0.0303 | 0.0070 | 1.0140 | 0.0067 | 0.0038   | 0.0048 |
| Fathers age at death                             | 27015805 | aging           | -0.3199 | 0.1000 | -3.1984 | 1.40E-03 | European  | 0.0394 | 0.0067 | 1.0188 | 0.0069 | -0.0036  | 0.0054 |
| Attention deficit hyperactivity disorder (GC)    | 27663945 | psychiatric     | 0.5288  | 0.1678 | 3.1508  | 1.60E-03 | European  | 0.0790 | 0.0292 | 0.9906 | 0.0076 | 0.0063   | 0.0055 |
| Attention deficit hyperactivity disorder (No GC) | 27663945 | psychiatric     | 0.5267  | 0.1670 | 3.1539  | 1.60E-03 | European  | 0.0800 | 0.0295 | 1.0053 | 0.0077 | 0.0064   | 0.0055 |
| Squamous cell lung cancer                        | 27488534 | cancer          | 0.4491  | 0.1462 | 3.0725  | 2.10E-03 | European  | 0.0376 | 0.0123 | 1.0118 | 0.0066 | -0.0078  | 0.0050 |
| Lung cancer (squamous cell)                      | 24880342 | cancer          | 0.5341  | 0.1749 | 3.0531  | 2.30E-03 | European  | 0.0495 | 0.0199 | 1.0073 | 0.0070 | -0.0093  | 0.0051 |
| Extreme BMI                                      | 23563607 | anthropometric  | 0.1725  | 0.0568 | 3.0380  | 2.40E-03 | European  | 0.6887 | 0.0557 | 1.0310 | 0.0122 | -0.0043  | 0.0072 |
| Childhood obesity                                | 22484627 | anthropometric  | 0.1819  | 0.0608 | 2.9920  | 2.80E-03 | European  | 0.4231 | 0.0440 | 0.9240 | 0.0076 | -0.0001  | 0.0049 |
| Attention deficit hyperactivity disorder         | 20732625 | psychiatric     | 0.4651  | 0.1672 | 2.7822  | 5.40E-03 | European  | 0.2231 | 0.0951 | 1.0091 | 0.0068 | -0.0082  | 0.0046 |
| Age at Menopause                                 | 26414677 | reproductive    | -0.1574 | 0.0579 | -2.7180 | 6.60E-03 | European  | 0.1350 | 0.0158 | 0.9913 | 0.0141 | 0.0036   | 0.0055 |
| Height_2010                                      | 20881960 | anthropometric  | -0.1019 | 0.0377 | -2.7068 | 6.80E-03 | European  | 0.2874 | 0.0165 | 1.0145 | 0.0192 | -0.0126  | 0.0070 |
| Waist circumference                              | 25673412 | anthropometric  | 0.1025  | 0.0407 | 2.5166  | 1.18E-02 | European  | 0.1214 | 0.0051 | 0.8447 | 0.0085 | 0.0095   | 0.0053 |
| Asthma                                           | 17611496 | autoimmune      | 0.2259  | 0.0943 | 2.3966  | 1.65E-02 | European  | 0.1243 | 0.0296 | 1.0069 | 0.0094 | 0.0028   | 0.0056 |
| Total lipids in small HDL                        | 27005778 | metabolites     | 0.3427  | 0.1498 | 2.2872  | 2.22E-02 | European  | 0.0515 | 0.0271 | 1.0036 | 0.0078 | -0.0018  | 0.0045 |
| Extreme height                                   | 23563607 | anthropometric  | -0.1143 | 0.0515 | -2.2203 | 2.64E-02 | European  | 1.2504 | 0.1062 | 1.0303 | 0.0181 | -0.0018  | 0.0080 |
| Anorexia Nervosa                                 | 24514567 | psychiatric     | 0.1212  | 0.0552 | 2.1978  | 2.80E-02 | European  | 0.5255 | 0.0299 | 0.9088 | 0.0071 | 0.0089   | 0.0054 |
| Child birth weight                               | 23202124 | anthropometric  | -0.1720 | 0.0810 | -2.1223 | 3.38E-02 | European  | 0.1138 | 0.0179 | 1.0037 | 0.0057 | 0.0003   | 0.0043 |
| Extreme waist-to-hip ratio                       | 23563607 | anthropometric  | 0.1976  | 0.0958 | 2.0615  | 3.93E-02 | European  | 0.3569 | 0.0595 | 0.9778 | 0.0085 | -0.0063  | 0.0067 |

| Trait                                                                    | PMID     | Category          | rg      | SE     | z       | p        | ethnicity | h2_obs | se     | h2_int | se     | gcov_int | se     |
|--------------------------------------------------------------------------|----------|-------------------|---------|--------|---------|----------|-----------|--------|--------|--------|--------|----------|--------|
| Multiple sclerosis                                                       | 21833088 | autoimmune        | 0.3455  | 0.1769 | 1.9537  | 5.07E-02 | European  | 0.0583 | 0.0279 | 1.0582 | 0.0089 | -0.0039  | 0.0058 |
| Glycoprotein acetyls; mainly a1-acid glycoprotein                        | 27005778 | metabolites       | 0.2190  | 0.1130 | 1.9385  | 5.26E-02 | European  | 0.1060 | 0.0295 | 0.9834 | 0.0067 | 0.0018   | 0.0048 |
| Mean platelet volume                                                     | 22139419 | haematological    | 0.1267  | 0.0676 | 1.8730  | 6.11E-02 | European  | 0.3185 | 0.0505 | 0.9819 | 0.0102 | -0.0083  | 0.0054 |
| Lung adenocarcinoma                                                      | 27488534 | cancer            | 0.2578  | 0.1399 | 1.8426  | 6.54E-02 | European  | 0.0313 | 0.0121 | 1.0192 | 0.0069 | -0.0006  | 0.0050 |
| Neo-openness to experience                                               | 21173776 | personality       | 0.2110  | 0.1179 | 1.7895  | 7.35E-02 | European  | 0.1040 | 0.0273 | 0.9926 | 0.0070 | -0.0100  | 0.0054 |
| Former vs Current smoker                                                 | 20418890 | smoking behaviour | -0.1901 | 0.1070 | -1.7760 | 7.57E-02 | European  | 0.0585 | 0.0109 | 1.0047 | 0.0069 | -0.0091  | 0.0052 |
| Eczema                                                                   | 26482879 | autoimmune        | -0.1737 | 0.0983 | -1.7669 | 7.72E-02 | Mixed     | 0.0680 | 0.0153 | 1.0236 | 0.0075 | 0.0234   | 0.0050 |
| Forced expiratory volume in 1 second (FEV1)                              | 26635082 | lung function     | -0.1145 | 0.0660 | -1.7343 | 8.29E-02 | European  | 0.1430 | 0.0158 | 0.9900 | 0.0070 | -0.0021  | 0.0050 |
| Acetoacetate                                                             | 27005778 | metabolites       | 0.1965  | 0.1171 | 1.6782  | 9.33E-02 | European  | 0.0818 | 0.0296 | 0.9767 | 0.0073 | 0.0032   | 0.0047 |
| Amyotrophic lateral sclerosis                                            | 27455348 | neurological      | 0.2097  | 0.1258 | 1.6666  | 9.56E-02 | European  | 0.0486 | 0.0129 | 0.9952 | 0.0067 | 0.0008   | 0.0050 |
| Primary sclerosing cholangitis                                           | 27992413 | autoimmune        | -0.1071 | 0.0646 | -1.6587 | 9.72E-02 | Mixed     | 0.3953 | 0.1622 | 0.9947 | 0.0164 | -0.0052  | 0.0058 |
| Total cholesterol in very large HDL                                      | 27005778 | metabolites       | -0.2971 | 0.1815 | -1.6369 | 1.02E-01 | European  | 0.0363 | 0.0224 | 1.0121 | 0.0122 | 0.0052   | 0.0047 |
| Neo-conscientiousness                                                    | 21173776 | personality       | -0.2735 | 0.1691 | -1.6175 | 1.06E-01 | European  | 0.0685 | 0.0302 | 1.0021 | 0.0070 | 0.0063   | 0.0051 |
| Triglycerides                                                            | 20686565 | lipids            | 0.0938  | 0.0591 | 1.5885  | 1.12E-01 | European  | 0.1692 | 0.0300 | 0.9671 | 0.0172 | 0.0088   | 0.0065 |
| Free cholesterol in very large HDL                                       | 27005778 | metabolites       | -0.2427 | 0.1529 | -1.5868 | 1.13E-01 | European  | 0.0473 | 0.0246 | 1.0151 | 0.0148 | 0.0030   | 0.0047 |
| Mean diameter for HDL particles                                          | 27005778 | metabolites       | -0.1665 | 0.1086 | -1.5327 | 1.25E-01 | European  | 0.1146 | 0.0292 | 1.0103 | 0.0208 | 0.0029   | 0.0046 |
| Total lipids in very large HDL                                           | 27005778 | metabolites       | -0.2227 | 0.1498 | -1.4870 | 1.37E-01 | European  | 0.0587 | 0.0274 | 1.0169 | 0.0160 | 0.0039   | 0.0049 |
| Leptin_not_adjBMI                                                        | 26833098 | hormone           | 0.1459  | 0.0989 | 1.4760  | 1.40E-01 | European  | 0.0951 | 0.0163 | 0.9969 | 0.0068 | -0.0008  | 0.0053 |
| 18: 2 linoleic acid (LA)                                                 | 27005778 | metabolites       | -0.1531 | 0.1086 | -1.4097 | 1.59E-01 | European  | 0.1301 | 0.0501 | 1.0024 | 0.0098 | 0.0114   | 0.0046 |
| 22: 6 docosahexaenoic acid                                               | 27005778 | metabolites       | -0.1475 | 0.1054 | -1.3999 | 1.62E-01 | European  | 0.1383 | 0.0382 | 0.9937 | 0.0079 | 0.0044   | 0.0047 |
| Glucose                                                                  | 27005778 | metabolites       | 0.1342  | 0.0980 | 1.3689  | 1.71E-01 | European  | 0.0881 | 0.0225 | 0.9946 | 0.0068 | -0.0048  | 0.0047 |
| Phospholipids in medium LDL                                              | 27005778 | metabolites       | 0.1667  | 0.1227 | 1.3579  | 1.75E-01 | European  | 0.0713 | 0.0394 | 1.0093 | 0.0176 | 0.0012   | 0.0047 |
| Description of average fatty acid chain length; not actual carbon number | 27005778 | metabolites       | -0.1679 | 0.1272 | -1.3205 | 1.87E-01 | European  | 0.1128 | 0.0378 | 0.9796 | 0.0076 | 0.0056   | 0.0051 |
| Sleep duration                                                           | 27494321 | sleeping          | -0.1009 | 0.0776 | -1.3007 | 1.93E-01 | European  | 0.0547 | 0.0052 | 1.0221 | 0.0081 | -0.0067  | 0.0056 |
| Tyrosine                                                                 | 27005778 | metabolites       | 0.1483  | 0.1162 | 1.2761  | 2.02E-01 | European  | 0.0745 | 0.0280 | 0.9993 | 0.0074 | -0.0070  | 0.0047 |

| Trait                                                    | PMID     | Category       | rg      | SE     | z       | p        | ethnicity | h2_obs | se     | h2_int | se     | gcov_int | se     |
|----------------------------------------------------------|----------|----------------|---------|--------|---------|----------|-----------|--------|--------|--------|--------|----------|--------|
| Serum creatinine (non-diabetes)                          | 26831199 | kidney         | 0.0672  | 0.0527 | 1.2758  | 2.02E-01 | Mixed     | 0.1148 | 0.0111 | 0.9789 | 0.0146 | 0.0015   | 0.0062 |
| HDL cholesterol                                          | 20686565 | lipids         | -0.0665 | 0.0529 | -1.2583 | 2.08E-01 | European  | 0.1256 | 0.0246 | 1.0621 | 0.0527 | -0.0054  | 0.0056 |
| Phospholipids in chylomicrons and largest VLDL particles | 27005778 | metabolites    | 0.1189  | 0.0946 | 1.2570  | 2.09E-01 | European  | 0.1080 | 0.0264 | 0.9801 | 0.0065 | 0.0018   | 0.0052 |
| Phospholipids in very large HDL                          | 27005778 | metabolites    | -0.1457 | 0.1182 | -1.2323 | 2.18E-01 | European  | 0.0864 | 0.0293 | 1.0100 | 0.0185 | 0.0005   | 0.0047 |
| Average number of methylene groups per a double bond     | 27005778 | metabolites    | 0.1077  | 0.0876 | 1.2304  | 2.19E-01 | European  | 0.2049 | 0.0750 | 0.9946 | 0.0087 | -0.0002  | 0.0045 |
| Heart rate                                               | 23583979 | haematological | 0.0783  | 0.0641 | 1.2200  | 2.23E-01 | Mixed     | 0.0844 | 0.0098 | 1.0126 | 0.0091 | 0.0021   | 0.0052 |
| Ratio of bisallylic groups to total fatty acids          | 27005778 | metabolites    | -0.0973 | 0.0800 | -1.2168 | 2.24E-01 | European  | 0.2809 | 0.0921 | 0.9840 | 0.0089 | -0.0016  | 0.0048 |
| Citrate                                                  | 27005778 | metabolites    | -0.1625 | 0.1365 | -1.1906 | 2.34E-01 | European  | 0.0651 | 0.0226 | 1.0150 | 0.0076 | -0.0017  | 0.0048 |
| Lumbar spine bone mineral density                        | 22504420 | bone           | 0.0677  | 0.0577 | 1.1725  | 2.41E-01 | Mixed     | 0.2670 | 0.0257 | 1.0154 | 0.0094 | -0.0058  | 0.0049 |
| Forced Vital capacity (FVC)                              | 28166213 | lung function  | -0.0646 | 0.0553 | -1.1672 | 2.43E-01 | European  | 0.2586 | 0.0158 | 0.9785 | 0.0080 | 0.0004   | 0.0054 |
| Autism spectrum disorder                                 | 0        | psychiatric    | 0.1115  | 0.0973 | 1.1449  | 2.52E-01 | European  | 0.3875 | 0.0534 | 0.9800 | 0.0074 | 0.0037   | 0.0053 |
| Serum creatinine                                         | 26831199 | kidney         | 0.0582  | 0.0513 | 1.1339  | 2.57E-01 | Mixed     | 0.1070 | 0.0097 | 0.9769 | 0.0149 | 0.0037   | 0.0062 |
| 2hr glucose adjusted for BMI                             | 20081857 | glycemic       | 0.1425  | 0.1266 | 1.1252  | 2.61E-01 | European  | 0.0980 | 0.0348 | 0.9950 | 0.0071 | -0.0054  | 0.0054 |
| Height; Females at age 10 and males at age 12            | 23449627 | anthropometric | -0.0708 | 0.0630 | -1.1245 | 2.61E-01 | European  | 0.4244 | 0.0473 | 0.9544 | 0.0080 | 0.0043   | 0.0054 |
| Total cholesterol in large HDL                           | 27005778 | metabolites    | -0.1159 | 0.1046 | -1.1078 | 2.68E-01 | European  | 0.1041 | 0.0260 | 1.0069 | 0.0152 | -0.0005  | 0.0045 |
| Ulcerative colitis                                       | 26192919 | autoimmune     | -0.0734 | 0.0667 | -1.1010 | 2.71E-01 | European  | 0.2503 | 0.0336 | 1.0519 | 0.0112 | 0.0112   | 0.0055 |
| Crohn's disease                                          | 26192919 | autoimmune     | -0.0619 | 0.0576 | -1.0745 | 2.83E-01 | European  | 0.4949 | 0.0571 | 1.0261 | 0.0113 | 0.0155   | 0.0052 |
| Phospholipids in large LDL                               | 27005778 | metabolites    | 0.1465  | 0.1369 | 1.0699  | 2.85E-01 | European  | 0.0580 | 0.0410 | 1.0195 | 0.0196 | 0.0042   | 0.0048 |
| Total cholesterol in medium LDL                          | 27005778 | metabolites    | 0.1374  | 0.1285 | 1.0691  | 2.85E-01 | European  | 0.0670 | 0.0430 | 1.0138 | 0.0201 | 0.0013   | 0.0048 |
| Inflammatory Bowel Disease (Euro)                        | 26192919 | autoimmune     | -0.0560 | 0.0532 | -1.0522 | 2.93E-01 | European  | 0.3302 | 0.0346 | 1.0564 | 0.0113 | 0.0127   | 0.0055 |
| Fasting proinsulin                                       | 20081858 | glycemic       | 0.1047  | 0.1022 | 1.0252  | 3.05E-01 | European  | 0.2008 | 0.0899 | 0.9784 | 0.0105 | -0.0046  | 0.0052 |
| Urate                                                    | 23263486 | other          | 0.0557  | 0.0548 | 1.0171  | 3.09E-01 | European  | 0.1787 | 0.0610 | 0.9482 | 0.0545 | -0.0021  | 0.0059 |
| Forced Vital capacity (FVC)                              | 26635082 | lung function  | -0.0722 | 0.0725 | -0.9951 | 3.20E-01 | European  | 0.1450 | 0.0157 | 0.9869 | 0.0070 | -0.0020  | 0.0054 |
| Forced expiratory volume in 1 second (FEV1)              | 28166213 | lung function  | -0.0581 | 0.0588 | -0.9871 | 3.24E-01 | European  | 0.2639 | 0.0171 | 0.9723 | 0.0077 | -0.0018  | 0.0057 |
| Triglycerides in small HDL                               | 27005778 | metabolites    | 0.1307  | 0.1328 | 0.9839  | 3.25E-01 | European  | 0.0638 | 0.0275 | 0.9999 | 0.0089 | 0.0085   | 0.0047 |



| Trait                                     | PMID     | Category          | rg      | SE     | z       | p        | ethnicity | h2_obs | se     | h2_int | se     | gcov_int | se     |
|-------------------------------------------|----------|-------------------|---------|--------|---------|----------|-----------|--------|--------|--------|--------|----------|--------|
| Albumin                                   | 27005778 | metabolites       | 0.1415  | 0.1439 | 0.9833  | 3.26E-01 | European  | 0.0636 | 0.0256 | 0.9884 | 0.0073 | 0.0042   | 0.0047 |
| Concentration of medium LDL particles     | 27005778 | metabolites       | 0.1172  | 0.1199 | 0.9774  | 3.28E-01 | European  | 0.0773 | 0.0455 | 1.0126 | 0.0184 | 0.0045   | 0.0047 |
| Concentration of medium HDL particles     | 27005778 | metabolites       | 0.1286  | 0.1319 | 0.9746  | 3.30E-01 | European  | 0.0676 | 0.0253 | 0.9934 | 0.0078 | 0.0012   | 0.0046 |
| HbA1C                                     | 20858683 | glycemic          | 0.0856  | 0.0903 | 0.9478  | 3.43E-01 | European  | 0.0637 | 0.0119 | 1.0005 | 0.0073 | -0.0034  | 0.0051 |
| Age of smoking initiation                 | 20418890 | smoking behaviour | -0.1250 | 0.1337 | -0.9348 | 3.50E-01 | European  | 0.0649 | 0.0187 | 0.9983 | 0.0062 | -0.0096  | 0.0049 |
| Total lipids in medium HDL                | 27005778 | metabolites       | 0.1310  | 0.1403 | 0.9342  | 3.50E-01 | European  | 0.0630 | 0.0255 | 0.9953 | 0.0081 | 0.0002   | 0.0046 |
| Total Cholesterol                         | 20686565 | lipids            | 0.0492  | 0.0531 | 0.9269  | 3.54E-01 | European  | 0.1339 | 0.0247 | 1.0216 | 0.0371 | 0.0055   | 0.0059 |
| Total cholesterol in LDL                  | 27005778 | metabolites       | 0.1188  | 0.1296 | 0.9166  | 3.59E-01 | European  | 0.0663 | 0.0463 | 1.0148 | 0.0215 | 0.0030   | 0.0050 |
| Alzheimer's disease                       | 24162737 | neurological      | -0.0966 | 0.1071 | -0.9022 | 3.67E-01 | European  | 0.0406 | 0.0232 | 1.0706 | 0.0330 | 0.0107   | 0.0051 |
| Concentration of large VLDL particles     | 27005778 | metabolites       | 0.0821  | 0.0913 | 0.8993  | 3.69E-01 | European  | 0.1395 | 0.0339 | 0.9711 | 0.0073 | 0.0029   | 0.0048 |
| Cholesterol esters in medium HDL          | 27005778 | metabolites       | 0.1420  | 0.1584 | 0.8965  | 3.70E-01 | European  | 0.0546 | 0.0280 | 1.0003 | 0.0088 | -0.0034  | 0.0047 |
| Concentration of large LDL particles      | 27005778 | metabolites       | 0.1115  | 0.1255 | 0.8886  | 3.74E-01 | European  | 0.0718 | 0.0470 | 1.0173 | 0.0197 | 0.0042   | 0.0047 |
| Total lipids in medium LDL                | 27005778 | metabolites       | 0.1051  | 0.1184 | 0.8872  | 3.75E-01 | European  | 0.0787 | 0.0462 | 1.0110 | 0.0189 | 0.0047   | 0.0048 |
| Total cholesterol in large LDL            | 27005778 | metabolites       | 0.1172  | 0.1325 | 0.8845  | 3.76E-01 | European  | 0.0614 | 0.0432 | 1.0168 | 0.0208 | 0.0036   | 0.0050 |
| Concentration of very large HDL particles | 27005778 | metabolites       | -0.1193 | 0.1355 | -0.8804 | 3.79E-01 | European  | 0.0605 | 0.0263 | 1.0040 | 0.0165 | -0.0003  | 0.0046 |
| Rheumatoid Arthritis                      | 24390342 | autoimmune        | 0.0454  | 0.0527 | 0.8626  | 3.88E-01 | European  | 0.1564 | 0.0301 | 1.0278 | 0.0183 | 0.0183   | 0.0050 |
| Total lipids in large LDL                 | 27005778 | metabolites       | 0.1074  | 0.1260 | 0.8522  | 3.94E-01 | European  | 0.0716 | 0.0482 | 1.0159 | 0.0203 | 0.0038   | 0.0048 |
| Free cholesterol in large HDL             | 27005778 | metabolites       | -0.0860 | 0.1027 | -0.8379 | 4.02E-01 | European  | 0.1061 | 0.0268 | 1.0083 | 0.0152 | -0.0019  | 0.0046 |
| Cholesterol esters in medium LDL          | 27005778 | metabolites       | 0.1010  | 0.1207 | 0.8373  | 4.02E-01 | European  | 0.0777 | 0.0466 | 1.0112 | 0.0193 | 0.0044   | 0.0048 |
| Phospholipids in very small VLDL          | 27005778 | metabolites       | 0.0954  | 0.1141 | 0.8367  | 4.03E-01 | European  | 0.0819 | 0.0375 | 1.0157 | 0.0156 | 0.0041   | 0.0044 |
| LDL cholesterol                           | 20686565 | lipids            | 0.0518  | 0.0626 | 0.8268  | 4.08E-01 | European  | 0.1023 | 0.0295 | 1.0544 | 0.0514 | 0.0043   | 0.0058 |
| Cholesterol esters in large LDL           | 27005778 | metabolites       | 0.1035  | 0.1256 | 0.8244  | 4.10E-01 | European  | 0.0732 | 0.0480 | 1.0136 | 0.0203 | 0.0034   | 0.0048 |
| Serumurate overweight                     | 25811787 | uric_acid         | 0.0697  | 0.0849 | 0.8218  | 4.11E-01 | European  | 0.5210 | 0.2265 | 0.9697 | 0.0211 | -0.0018  | 0.0050 |
| Triglycerides in very small VLDL          | 27005778 | metabolites       | 0.0749  | 0.0920 | 0.8133  | 4.16E-01 | European  | 0.1383 | 0.0373 | 0.9980 | 0.0102 | 0.0090   | 0.0046 |

| Trait                                                       | PMID     | Category       | rg      | SE     | z       | p        | ethnicity | h2_obs | se     | h2_int | se     | gcov_int | se     |
|-------------------------------------------------------------|----------|----------------|---------|--------|---------|----------|-----------|--------|--------|--------|--------|----------|--------|
| Total lipids in small LDL                                   | 27005778 | metabolites    | 0.0888  | 0.1098 | 0.8088  | 4.19E-01 | European  | 0.0852 | 0.0423 | 1.0087 | 0.0159 | 0.0059   | 0.0048 |
| Omega-3 fatty acids                                         | 27005778 | metabolites    | -0.0862 | 0.1070 | -0.8062 | 4.20E-01 | European  | 0.1524 | 0.0436 | 0.9918 | 0.0081 | 0.0025   | 0.0052 |
| Phospholipids in small VLDL                                 | 27005778 | metabolites    | 0.0763  | 0.0949 | 0.8045  | 4.21E-01 | European  | 0.1111 | 0.0354 | 1.0006 | 0.0088 | 0.0077   | 0.0046 |
| Free cholesterol                                            | 27005778 | metabolites    | -0.1233 | 0.1547 | -0.7973 | 4.25E-01 | European  | 0.0712 | 0.0417 | 1.0225 | 0.0109 | 0.0111   | 0.0048 |
| Triglycerides in IDL                                        | 27005778 | metabolites    | 0.0830  | 0.1048 | 0.7921  | 4.28E-01 | European  | 0.1037 | 0.0345 | 1.0115 | 0.0157 | 0.0088   | 0.0044 |
| Serum cystatin c                                            | 26831199 | kidney         | -0.0565 | 0.0717 | -0.7881 | 4.31E-01 | Mixed     | 0.1698 | 0.0678 | 0.9612 | 0.0148 | -0.0019  | 0.0056 |
| HOMA-B                                                      | 20081858 | glycemic       | -0.0813 | 0.1035 | -0.7854 | 4.32E-01 | European  | 0.0870 | 0.0139 | 0.9918 | 0.0068 | 0.0078   | 0.0056 |
| Concentration of IDL particles                              | 27005778 | metabolites    | 0.0942  | 0.1236 | 0.7623  | 4.46E-01 | European  | 0.0721 | 0.0407 | 1.0192 | 0.0171 | 0.0046   | 0.0046 |
| Free cholesterol in small VLDL                              | 27005778 | metabolites    | 0.0764  | 0.1003 | 0.7616  | 4.46E-01 | European  | 0.1085 | 0.0336 | 1.0011 | 0.0088 | 0.0086   | 0.0048 |
| Concentration of small LDL particles                        | 27005778 | metabolites    | 0.0795  | 0.1050 | 0.7576  | 4.49E-01 | European  | 0.0934 | 0.0412 | 1.0074 | 0.0146 | 0.0067   | 0.0047 |
| Cholesterol esters in large HDL                             | 27005778 | metabolites    | -0.0781 | 0.1033 | -0.7562 | 4.50E-01 | European  | 0.1210 | 0.0290 | 1.0016 | 0.0150 | -0.0013  | 0.0046 |
| Phospholipids in very large VLDL                            | 27005778 | metabolites    | 0.0675  | 0.0894 | 0.7550  | 4.50E-01 | European  | 0.1144 | 0.0281 | 0.9822 | 0.0068 | 0.0040   | 0.0048 |
| Free cholesterol in large LDL                               | 27005778 | metabolites    | 0.0987  | 0.1308 | 0.7543  | 4.51E-01 | European  | 0.0598 | 0.0445 | 1.0190 | 0.0216 | 0.0035   | 0.0050 |
| Phospholipids in IDL                                        | 27005778 | metabolites    | 0.1052  | 0.1399 | 0.7523  | 4.52E-01 | European  | 0.0569 | 0.0389 | 1.0226 | 0.0180 | 0.0060   | 0.0047 |
| Difference in height between childhood and adulthood; age 8 | 23449627 | anthropometric | -0.0754 | 0.1005 | -0.7506 | 4.53E-01 | European  | 0.3367 | 0.0503 | 0.9714 | 0.0077 | -0.0043  | 0.0063 |
| Ratio of bisallylic groups to double bonds                  | 27005778 | metabolites    | -0.0561 | 0.0750 | -0.7481 | 4.54E-01 | European  | 0.3009 | 0.1003 | 0.9760 | 0.0101 | -0.0046  | 0.0047 |
| Type 2 Diabetes                                             | 22885922 | glycemic       | -0.0490 | 0.0655 | -0.7480 | 4.54E-01 | European  | 0.0891 | 0.0097 | 1.0066 | 0.0077 | 0.0236   | 0.0050 |
| Forearm Bone mineral density                                | 26367794 | bone           | 0.1130  | 0.1558 | 0.7253  | 4.68E-01 | Mixed     | 0.0809 | 0.0441 | 1.0128 | 0.0071 | -0.0082  | 0.0049 |
| Apolipoprotein B                                            | 27005778 | metabolites    | 0.0783  | 0.1099 | 0.7122  | 4.76E-01 | European  | 0.0854 | 0.0388 | 1.0074 | 0.0140 | 0.0077   | 0.0048 |
| Concentration of medium VLDL particles                      | 27005778 | metabolites    | 0.0621  | 0.0873 | 0.7113  | 4.77E-01 | European  | 0.1501 | 0.0350 | 0.9804 | 0.0076 | 0.0055   | 0.0046 |
| Phenylalanine                                               | 27005778 | metabolites    | 0.0994  | 0.1410 | 0.7048  | 4.81E-01 | European  | 0.0567 | 0.0226 | 1.0032 | 0.0072 | 0.0056   | 0.0050 |
| Chronic Kidney Disease                                      | 26831199 | kidney         | -0.0770 | 0.1106 | -0.6962 | 4.86E-01 | Mixed     | 0.0186 | 0.0057 | 1.0154 | 0.0096 | 0.0184   | 0.0056 |
| Femoral neck bone mineral density                           | 22504420 | bone           | 0.0377  | 0.0543 | 0.6945  | 4.87E-01 | Mixed     | 0.3038 | 0.0254 | 0.9800 | 0.0085 | 0.0004   | 0.0054 |
| Serum total cholesterol                                     | 27005778 | metabolites    | 0.0911  | 0.1329 | 0.6854  | 4.93E-01 | European  | 0.0622 | 0.0376 | 1.0230 | 0.0144 | 0.0063   | 0.0049 |
| Ferritin                                                    | 25352340 | metal          | -0.0761 | 0.1124 | -0.6770 | 4.98E-01 | European  | 0.0921 | 0.0266 | 1.0273 | 0.0095 | 0.0045   | 0.0061 |
| Total lipids in IDL                                         | 27005778 | metabolites    | 0.0844  | 0.1247 | 0.6767  | 4.99E-01 | European  | 0.0705 | 0.0423 | 1.0201 | 0.0178 | 0.0042   | 0.0046 |

| Trait                                                                    | PMID     | Category        | rg      | SE     | z       | p        | ethnicity | h2_obs | se     | h2_int | se     | gcov_int | se     |
|--------------------------------------------------------------------------|----------|-----------------|---------|--------|---------|----------|-----------|--------|--------|--------|--------|----------|--------|
| Serum total triglycerides                                                | 27005778 | metabolites     | 0.0579  | 0.0873 | 0.6632  | 5.07E-01 | European  | 0.1298 | 0.0361 | 0.9899 | 0.0078 | 0.0103   | 0.0049 |
| Platelet count                                                           | 22139419 | haematological  | -0.0348 | 0.0527 | -0.6613 | 5.08E-01 | European  | 0.1196 | 0.0115 | 0.9856 | 0.0094 | 0.0060   | 0.0045 |
| Valine                                                                   | 27005778 | metabolites     | 0.0840  | 0.1287 | 0.6525  | 5.14E-01 | European  | 0.0646 | 0.0205 | 1.0130 | 0.0076 | -0.0032  | 0.0054 |
| Total cholesterol in small VLDL                                          | 27005778 | metabolites     | 0.0728  | 0.1119 | 0.6505  | 5.15E-01 | European  | 0.0867 | 0.0324 | 1.0071 | 0.0097 | 0.0069   | 0.0047 |
| Forced expiratory volume in 1 second (FEV1)/ Forced Vital capacity (FVC) | 26635082 | lung function   | -0.0508 | 0.0782 | -0.6492 | 5.16E-01 | European  | 0.1165 | 0.0150 | 0.9793 | 0.0069 | -0.0012  | 0.0048 |
| Concentration of small VLDL particles                                    | 27005778 | metabolites     | 0.0567  | 0.0878 | 0.6452  | 5.19E-01 | European  | 0.1512 | 0.0377 | 0.9896 | 0.0084 | 0.0077   | 0.0047 |
| Total lipids in chylomicrons and largest VLDL particles                  | 27005778 | metabolites     | 0.0616  | 0.0971 | 0.6342  | 5.26E-01 | European  | 0.1329 | 0.0280 | 0.9849 | 0.0068 | 0.0012   | 0.0051 |
| Concentration of very large VLDL particles                               | 27005778 | metabolites     | 0.0629  | 0.0994 | 0.6331  | 5.27E-01 | European  | 0.1335 | 0.0305 | 0.9802 | 0.0075 | 0.0027   | 0.0051 |
| Triglycerides in small VLDL                                              | 27005778 | metabolites     | 0.0600  | 0.0950 | 0.6321  | 5.27E-01 | European  | 0.1221 | 0.0356 | 0.9930 | 0.0078 | 0.0097   | 0.0049 |
| Omega-9 and saturated fatty acids                                        | 27005778 | metabolites     | 0.0856  | 0.1369 | 0.6254  | 5.32E-01 | European  | 0.0962 | 0.0448 | 0.9932 | 0.0082 | 0.0072   | 0.0048 |
| Alanine                                                                  | 27005778 | metabolites     | 0.0634  | 0.1022 | 0.6206  | 5.35E-01 | European  | 0.0973 | 0.0275 | 1.0058 | 0.0075 | -0.0024  | 0.0051 |
| Triglycerides in large VLDL                                              | 27005778 | metabolites     | 0.0550  | 0.0901 | 0.6098  | 5.42E-01 | European  | 0.1180 | 0.0288 | 0.9862 | 0.0069 | 0.0067   | 0.0050 |
| Adiponectin                                                              | 22479202 | cardiometabolic | 0.0519  | 0.0853 | 0.6088  | 5.43E-01 | Mixed     | 0.1222 | 0.0264 | 1.0213 | 0.0135 | -0.0069  | 0.0050 |
| Free cholesterol in IDL                                                  | 27005778 | metabolites     | 0.0773  | 0.1277 | 0.6057  | 5.45E-01 | European  | 0.0676 | 0.0384 | 1.0214 | 0.0183 | 0.0048   | 0.0048 |
| Total lipids in large VLDL                                               | 27005778 | metabolites     | 0.0527  | 0.0896 | 0.5883  | 5.56E-01 | European  | 0.1449 | 0.0299 | 0.9832 | 0.0068 | 0.0043   | 0.0049 |
| Total lipids in small VLDL                                               | 27005778 | metabolites     | 0.0533  | 0.0908 | 0.5866  | 5.58E-01 | European  | 0.1444 | 0.0385 | 0.9917 | 0.0084 | 0.0074   | 0.0047 |
| Total cholesterol in IDL                                                 | 27005778 | metabolites     | 0.0745  | 0.1280 | 0.5819  | 5.61E-01 | European  | 0.0679 | 0.0443 | 1.0200 | 0.0188 | 0.0034   | 0.0048 |
| Total cholesterol in HDL                                                 | 27005778 | metabolites     | -0.0612 | 0.1066 | -0.5745 | 5.66E-01 | European  | 0.0967 | 0.0257 | 1.0051 | 0.0124 | 0.0006   | 0.0046 |
| Phospholipids in large VLDL                                              | 27005778 | metabolites     | 0.0525  | 0.0914 | 0.5744  | 5.66E-01 | European  | 0.1203 | 0.0314 | 0.9879 | 0.0069 | 0.0073   | 0.0049 |
| Hip circumference                                                        | 25673412 | anthropometric  | 0.0239  | 0.0419 | 0.5700  | 5.69E-01 | European  | 0.1272 | 0.0059 | 0.8609 | 0.0085 | 0.0074   | 0.0053 |
| Forced expiratory volume in 1 second (FEV1)/ Forced Vital capacity (FVC) | 21946350 | lung function   | -0.0400 | 0.0704 | -0.5684 | 5.70E-01 | European  | 0.1242 | 0.0137 | 0.9281 | 0.0081 | 0.0045   | 0.0053 |
| Acetate                                                                  | 27005778 | metabolites     | -0.0749 | 0.1327 | -0.5643 | 5.73E-01 | European  | 0.0512 | 0.0185 | 1.0036 | 0.0071 | 0.0030   | 0.0049 |
| Free cholesterol in medium VLDL                                          | 27005778 | metabolites     | 0.0508  | 0.0910 | 0.5579  | 5.77E-01 | European  | 0.1155 | 0.0336 | 0.9939 | 0.0073 | 0.0080   | 0.0049 |
| Sitting height ratio                                                     | 25865494 | anthropometric  | -0.0428 | 0.0780 | -0.5489 | 5.83E-01 | European  | 0.2253 | 0.0280 | 0.9784 | 0.0075 | 0.0018   | 0.0058 |

| Trait                                                    | PMID     | Category       | rg      | SE     | z       | p        | ethnicity | h2_obs | se     | h2_int | se     | gcov_int | se     |
|----------------------------------------------------------|----------|----------------|---------|--------|---------|----------|-----------|--------|--------|--------|--------|----------|--------|
| Total lipids in medium VLDL                              | 27005778 | metabolites    | 0.0487  | 0.0887 | 0.5487  | 5.83E-01 | European  | 0.1444 | 0.0347 | 0.9841 | 0.0073 | 0.0062   | 0.0049 |
| Mono-unsaturated fatty acids                             | 27005778 | metabolites    | 0.0703  | 0.1284 | 0.5474  | 5.84E-01 | European  | 0.1137 | 0.0444 | 0.9855 | 0.0082 | 0.0083   | 0.0050 |
| Femoral Neck bone mineral density                        | 26367794 | bone           | -0.0390 | 0.0726 | -0.5379 | 5.91E-01 | Mixed     | 0.1241 | 0.0149 | 0.9774 | 0.0083 | 0.0003   | 0.0055 |
| Total lipids in large HDL                                | 27005778 | metabolites    | -0.0520 | 0.1003 | -0.5181 | 6.04E-01 | European  | 0.1294 | 0.0297 | 1.0010 | 0.0160 | -0.0010  | 0.0046 |
| Lumbar Spine bone mineral density                        | 26367794 | bone           | 0.0355  | 0.0688 | 0.5160  | 6.06E-01 | Mixed     | 0.1274 | 0.0163 | 0.9806 | 0.0086 | -0.0047  | 0.0052 |
| Triglycerides in medium VLDL                             | 27005778 | metabolites    | 0.0493  | 0.0977 | 0.5044  | 6.14E-01 | European  | 0.1007 | 0.0298 | 0.9973 | 0.0068 | 0.0081   | 0.0050 |
| Concentration of very small VLDL particles               | 27005778 | metabolites    | 0.0503  | 0.1007 | 0.4990  | 6.18E-01 | European  | 0.1135 | 0.0366 | 1.0058 | 0.0127 | 0.0080   | 0.0044 |
| Birth weight                                             | 27680694 | anthropometric | -0.0244 | 0.0489 | -0.4986 | 6.18E-01 | European  | 0.1009 | 0.0072 | 1.0455 | 0.0104 | -0.0011  | 0.0056 |
| Forced expiratory volume in 1 second (FEV1)              | 21946350 | lung function  | -0.0407 | 0.0836 | -0.4864 | 6.27E-01 | European  | 0.1745 | 0.0226 | 0.8791 | 0.0125 | -0.0157  | 0.0086 |
| Phospholipids in medium VLDL                             | 27005778 | metabolites    | 0.0431  | 0.0924 | 0.4664  | 6.41E-01 | European  | 0.1132 | 0.0334 | 0.9958 | 0.0073 | 0.0095   | 0.0049 |
| Isoleucine                                               | 27005778 | metabolites    | 0.0589  | 0.1264 | 0.4662  | 6.41E-01 | European  | 0.0681 | 0.0241 | 0.9960 | 0.0072 | -0.0011  | 0.0055 |
| Average number of double bonds in a fatty acid chain     | 27005778 | metabolites    | -0.0418 | 0.0935 | -0.4471 | 6.55E-01 | European  | 0.1764 | 0.0527 | 1.0001 | 0.0083 | -0.0011  | 0.0049 |
| Fasting glucose main effect                              | 22581228 | glycemic       | 0.0330  | 0.0747 | 0.4413  | 6.59E-01 | European  | 0.0978 | 0.0192 | 0.9989 | 0.0102 | 0.0034   | 0.0050 |
| Leucine                                                  | 27005778 | metabolites    | 0.0650  | 0.1502 | 0.4325  | 6.65E-01 | European  | 0.0463 | 0.0216 | 1.0085 | 0.0070 | -0.0015  | 0.0052 |
| Free cholesterol in medium HDL                           | 27005778 | metabolites    | 0.0542  | 0.1277 | 0.4243  | 6.71E-01 | European  | 0.0694 | 0.0232 | 0.9965 | 0.0084 | 0.0022   | 0.0047 |
| Concentration of chylomicrons and largest VLDL particles | 27005778 | metabolites    | 0.0422  | 0.1007 | 0.4192  | 6.75E-01 | European  | 0.1218 | 0.0282 | 0.9862 | 0.0072 | 0.0069   | 0.0049 |
| Concentration of large HDL particles                     | 27005778 | metabolites    | -0.0417 | 0.0996 | -0.4188 | 6.75E-01 | European  | 0.1321 | 0.0297 | 0.9995 | 0.0164 | -0.0006  | 0.0046 |
| Infant head circumference                                | 22504419 | anthropometric | -0.0401 | 0.0999 | -0.4017 | 6.88E-01 | European  | 0.2212 | 0.0440 | 0.9924 | 0.0069 | -0.0115  | 0.0048 |
| Apolipoprotein A-I                                       | 27005778 | metabolites    | -0.0471 | 0.1231 | -0.3828 | 7.02E-01 | European  | 0.0806 | 0.0269 | 1.0025 | 0.0110 | 0.0069   | 0.0047 |
| Total lipids in very small VLDL                          | 27005778 | metabolites    | 0.0371  | 0.1031 | 0.3602  | 7.19E-01 | European  | 0.1042 | 0.0363 | 1.0102 | 0.0130 | 0.0068   | 0.0044 |
| Triglycerides in very large VLDL                         | 27005778 | metabolites    | 0.0304  | 0.0853 | 0.3570  | 7.21E-01 | European  | 0.1309 | 0.0294 | 0.9761 | 0.0068 | 0.0067   | 0.0048 |
| Mean diameter for VLDL particles                         | 27005778 | metabolites    | 0.0317  | 0.0932 | 0.3407  | 7.33E-01 | European  | 0.1361 | 0.0338 | 0.9896 | 0.0088 | 0.0022   | 0.0050 |
| Triglycerides in chylomicrons and largest VLDL particles | 27005778 | metabolites    | 0.0327  | 0.0962 | 0.3394  | 7.34E-01 | European  | 0.1020 | 0.0273 | 0.9859 | 0.0070 | 0.0079   | 0.0050 |

| Trait                                                                    | PMID     | Category       | rg      | SE     | z       | p        | ethnicity | h2_obs | se     | h2_int | se     | gcov_int | se     |
|--------------------------------------------------------------------------|----------|----------------|---------|--------|---------|----------|-----------|--------|--------|--------|--------|----------|--------|
| Total cholesterol in medium HDL                                          | 27005778 | metabolites    | 0.0487  | 0.1466 | 0.3324  | 7.40E-01 | European  | 0.0554 | 0.0251 | 0.9983 | 0.0091 | 0.0005   | 0.0047 |
| Mean diameter for LDL particles                                          | 27005778 | metabolites    | -0.0432 | 0.1349 | -0.3205 | 7.49E-01 | European  | 0.0543 | 0.0252 | 0.9977 | 0.0120 | -0.0022  | 0.0045 |
| Total cholesterol in medium VLDL                                         | 27005778 | metabolites    | 0.0285  | 0.0890 | 0.3201  | 7.49E-01 | European  | 0.1258 | 0.0355 | 0.9917 | 0.0081 | 0.0083   | 0.0048 |
| Cholesterol esters in large VLDL                                         | 27005778 | metabolites    | 0.0247  | 0.0832 | 0.2971  | 7.66E-01 | European  | 0.1707 | 0.0345 | 0.9753 | 0.0070 | 0.0043   | 0.0047 |
| Total lipids in very large VLDL                                          | 27005778 | metabolites    | 0.0262  | 0.0882 | 0.2970  | 7.67E-01 | European  | 0.1491 | 0.0302 | 0.9735 | 0.0069 | 0.0046   | 0.0047 |
| Primary biliary cirrhosis                                                | 26394269 | autoimmune     | -0.0245 | 0.0842 | -0.2914 | 7.71E-01 | European  | 0.3789 | 0.0647 | 1.0032 | 0.0100 | 0.0173   | 0.0060 |
| Phospholipids in medium HDL                                              | 27005778 | metabolites    | 0.0343  | 0.1218 | 0.2816  | 7.78E-01 | European  | 0.0707 | 0.0229 | 0.9934 | 0.0080 | 0.0046   | 0.0046 |
| Forced expiratory volume in 1 second (FEV1)/ Forced Vital capacity (FVC) | 28166213 | lung function  | 0.0171  | 0.0607 | 0.2815  | 7.78E-01 | European  | 0.2575 | 0.0211 | 0.9743 | 0.0096 | -0.0114  | 0.0057 |
| Total cholesterol in small LDL                                           | 27005778 | metabolites    | 0.0304  | 0.1173 | 0.2592  | 7.96E-01 | European  | 0.0688 | 0.0417 | 1.0167 | 0.0174 | 0.0067   | 0.0048 |
| Urinary albumin-to-creatinine ratio                                      | 26631737 | kidney         | 0.0227  | 0.0878 | 0.2583  | 7.96E-01 | European  | 0.0463 | 0.0091 | 0.9953 | 0.0074 | 0.0026   | 0.0052 |
| Phospholipids in large HDL                                               | 27005778 | metabolites    | -0.0259 | 0.1005 | -0.2573 | 7.97E-01 | European  | 0.1280 | 0.0300 | 0.9979 | 0.0152 | -0.0011  | 0.0047 |
| Urinary albumin-to-creatinine ratio (non-diabetes)                       | 26631737 | kidney         | 0.0228  | 0.0903 | 0.2530  | 8.00E-01 | European  | 0.0529 | 0.0106 | 0.9952 | 0.0073 | 0.0000   | 0.0051 |
| HOMA-IR                                                                  | 20081858 | glycemic       | -0.0266 | 0.1055 | -0.2522 | 8.01E-01 | European  | 0.0693 | 0.0125 | 1.0024 | 0.0067 | 0.0097   | 0.0051 |
| Free cholesterol in large VLDL                                           | 27005778 | metabolites    | 0.0201  | 0.0853 | 0.2356  | 8.14E-01 | European  | 0.1313 | 0.0300 | 0.9852 | 0.0069 | 0.0068   | 0.0049 |
| Difference in height between adolescence and adulthood; age 14           | 23449627 | anthropometric | -0.0269 | 0.1162 | -0.2319 | 8.17E-01 | European  | 0.4405 | 0.1068 | 0.9820 | 0.0070 | -0.0006  | 0.0049 |
| Chronotype                                                               | 27494321 | sleeping       | -0.0122 | 0.0527 | -0.2316 | 8.17E-01 | European  | 0.0993 | 0.0062 | 1.0195 | 0.0089 | -0.0021  | 0.0052 |
| Child birth length                                                       | 25281659 | anthropometric | 0.0188  | 0.0834 | 0.2260  | 8.21E-01 | European  | 0.1642 | 0.0235 | 0.9951 | 0.0072 | -0.0086  | 0.0056 |
| Total cholesterol in large VLDL                                          | 27005778 | metabolites    | -0.0182 | 0.0863 | -0.2111 | 8.33E-01 | European  | 0.1249 | 0.0290 | 0.9881 | 0.0066 | 0.0073   | 0.0047 |
| Transferrin                                                              | 25352340 | metal          | 0.0172  | 0.0885 | 0.1947  | 8.46E-01 | European  | 0.1636 | 0.0759 | 1.0613 | 0.0242 | -0.0023  | 0.0062 |
| Fasting insulin main effect                                              | 22581228 | glycemic       | 0.0154  | 0.0832 | 0.1853  | 8.53E-01 | European  | 0.0708 | 0.0102 | 1.0145 | 0.0075 | 0.0034   | 0.0051 |
| Systemic lupus erythematosus                                             | 26502338 | autoimmune     | -0.0171 | 0.0988 | -0.1729 | 8.63E-01 | European  | 0.3902 | 0.0682 | 1.1061 | 0.0107 | 0.0078   | 0.0067 |
| Celiac disease                                                           | 20190752 | autoimmune     | -0.0125 | 0.0760 | -0.1650 | 8.69E-01 | European  | 0.2920 | 0.0514 | 1.0703 | 0.0116 | 0.0049   | 0.0066 |
| Glutamine                                                                | 27005778 | metabolites    | -0.0154 | 0.1193 | -0.1291 | 8.97E-01 | European  | 0.0632 | 0.0216 | 1.0177 | 0.0080 | -0.0068  | 0.0047 |

| Trait                                            | PMID     | Category     | rg      | SE     | z       | p        | ethnicity | h2_obs | se     | h2_int | se     | gcov_int | se     |
|--------------------------------------------------|----------|--------------|---------|--------|---------|----------|-----------|--------|--------|--------|--------|----------|--------|
| Cholesterol esters in medium VLDL                | 27005778 | metabolites  | 0.0100  | 0.0902 | 0.1105  | 9.12E-01 | European  | 0.1541 | 0.0378 | 0.9851 | 0.0085 | 0.0075   | 0.0049 |
| Creatinine                                       | 27005778 | metabolites  | 0.0042  | 0.0889 | 0.0474  | 9.62E-01 | European  | 0.1117 | 0.0257 | 1.0136 | 0.0080 | -0.0053  | 0.0045 |
| Parkinsons disease                               | 19915575 | neurological | -0.0025 | 0.0714 | -0.0345 | 9.73E-01 | European  | 0.3740 | 0.1214 | 1.1274 | 0.0093 | -0.0010  | 0.0045 |
| Leptin_adjBMI                                    | 26833098 | hormone      | 0.0032  | 0.0973 | 0.0325  | 9.74E-01 | European  | 0.0929 | 0.0182 | 1.0049 | 0.0075 | -0.0024  | 0.0056 |
| Free cholesterol to esterified cholesterol ratio | 27005778 | metabolites  | 0.0038  | 0.1522 | 0.0250  | 9.80E-01 | European  | 0.0634 | 0.0499 | 1.0119 | 0.0115 | 0.0059   | 0.0045 |
| Triglycerides in very large HDL                  | 27005778 | metabolites  | -0.0018 | 0.1241 | -0.0147 | 9.88E-01 | European  | 0.0805 | 0.0273 | 1.0164 | 0.0303 | 0.0070   | 0.0047 |

**eTable 7.** Genetic correlations for “prevalence” Design (UKBB traits)

All results from LDhub analyses. Trait= trait against which genetic correlation was calculated. ethnicity= sample ethnicity for sample referenced in “Trait” column. rG= genetic correlation. SE= standard error for genetic correlation. z= Z-score. p= P-value for genetic correlation analysis. h2\_obs= Heritability on the observed scale for sample referenced in “Trait”. se= standard errors for variable reported in the cell to the left (i.e. h2\_obs, ht\_int, gcov\_int). h2\_int= LD score intercept for sample referenced in “Trait”. gcov\_int= cross-trait LD Score regression intercept.

| Trait                                                                       | ethnicity | rg      | SE     | z        | p        | h2_obs | se     | h2_int | se     | gcov_int | se     |
|-----------------------------------------------------------------------------|-----------|---------|--------|----------|----------|--------|--------|--------|--------|----------|--------|
| Overall health rating                                                       | European  | 0.5856  | 0.0427 | 13.7003  | 1.01E-42 | 0.0998 | 0.0032 | 1.0619 | 0.0112 | 0.0016   | 0.0068 |
| Age at first live birth                                                     | European  | -0.6675 | 0.0495 | -13.4902 | 1.79E-41 | 0.1652 | 0.0076 | 1.0493 | 0.0096 | 0.0010   | 0.0064 |
| Frequency of tiredness / lethargy in last 2 weeks                           | European  | 0.6389  | 0.0493 | 12.9614  | 2.02E-38 | 0.0589 | 0.0030 | 1.0312 | 0.0098 | 0.0016   | 0.0061 |
| Seen doctor (GP) for nerves anxiety tension or depression                   | European  | 0.7125  | 0.0557 | 12.7951  | 1.75E-37 | 0.0612 | 0.0029 | 1.0150 | 0.0102 | 0.0103   | 0.0067 |
| Seen a psychiatrist for nerves anxiety tension or depression                | European  | 0.7935  | 0.0634 | 12.5161  | 6.09E-36 | 0.0304 | 0.0022 | 1.0094 | 0.0084 | 0.0048   | 0.0059 |
| Long-standing illness disability or infirmity                               | European  | 0.5569  | 0.0460 | 12.1096  | 9.40E-34 | 0.0501 | 0.0025 | 1.0270 | 0.0089 | 0.0044   | 0.0059 |
| Age completed full time education                                           | European  | -0.5226 | 0.0451 | -11.6003 | 4.10E-31 | 0.0846 | 0.0045 | 1.0625 | 0.0097 | 0.0006   | 0.0065 |
| Frequency of tenseness / restlessness in last 2 weeks                       | European  | 0.6795  | 0.0594 | 11.4464  | 2.45E-30 | 0.0433 | 0.0028 | 1.0172 | 0.0095 | 0.0025   | 0.0058 |
| Taking other prescription medications                                       | European  | 0.5159  | 0.0455 | 11.3268  | 9.67E-30 | 0.0432 | 0.0024 | 1.0176 | 0.0089 | 0.0091   | 0.0056 |
| Illness injury bereavement stress in last 2 years: Financial difficulties   | European  | 0.6474  | 0.0573 | 11.2929  | 1.42E-29 | 0.0328 | 0.0023 | 1.0311 | 0.0082 | -0.0089  | 0.0059 |
| Number of treatments/medications taken                                      | European  | 0.4789  | 0.0427 | 11.2167  | 3.38E-29 | 0.0606 | 0.0026 | 1.0322 | 0.0095 | 0.0032   | 0.0058 |
| Number of self-reported non-cancer illnesses                                | European  | 0.4503  | 0.0404 | 11.1492  | 7.22E-29 | 0.0614 | 0.0026 | 1.0262 | 0.0102 | 0.0040   | 0.0056 |
| Pain type(s) experienced in last month: None of the above                   | European  | -0.5077 | 0.0461 | -11.0130 | 3.31E-28 | 0.0554 | 0.0027 | 1.0358 | 0.0086 | -0.0081  | 0.0063 |
| Current tobacco smoking                                                     | European  | 0.5394  | 0.0494 | 10.9113  | 1.02E-27 | 0.0553 | 0.0029 | 1.0127 | 0.0097 | -0.0057  | 0.0061 |
| Smoking status: Current                                                     | European  | 0.5442  | 0.0502 | 10.8444  | 2.12E-27 | 0.0521 | 0.0029 | 1.0131 | 0.0096 | -0.0077  | 0.0060 |
| Current employment status: Unable to work because of sickness or disability | European  | 0.7708  | 0.0734 | 10.5033  | 8.34E-26 | 0.0243 | 0.0018 | 1.0192 | 0.0072 | 0.0003   | 0.0056 |
| Pain type(s) experienced in last month: Neck or shoulder pain               | European  | 0.5366  | 0.0512 | 10.4765  | 1.11E-25 | 0.0325 | 0.0020 | 1.0283 | 0.0085 | -0.0007  | 0.0053 |
| Chest pain or discomfort                                                    | European  | 0.6224  | 0.0601 | 10.3513  | 4.13E-25 | 0.0328 | 0.0021 | 1.0194 | 0.0078 | -0.0006  | 0.0060 |
| Past tobacco smoking                                                        | European  | -0.4733 | 0.0458 | -10.3353 | 4.88E-25 | 0.0902 | 0.0041 | 1.0269 | 0.0109 | 0.0086   | 0.0065 |
| Frequency of unenthusiasm / disinterest in last 2 weeks                     | European  | 0.6626  | 0.0649 | 10.2095  | 1.80E-24 | 0.0388 | 0.0029 | 1.0182 | 0.0100 | 0.0040   | 0.0063 |
| Loneliness isolation                                                        | European  | 0.5577  | 0.0552 | 10.1067  | 5.16E-24 | 0.0373 | 0.0024 | 1.0267 | 0.0080 | 0.0061   | 0.0060 |
| Frequency of depressed mood in last 2 weeks                                 | European  | 0.6895  | 0.0689 | 10.0074  | 1.41E-23 | 0.0418 | 0.0029 | 1.0149 | 0.0088 | 0.0039   | 0.0060 |
| Townsend deprivation index at recruitment                                   | European  | 0.6057  | 0.0611 | 9.9054   | 3.94E-23 | 0.0337 | 0.0020 | 1.0350 | 0.0078 | 0.0040   | 0.0057 |
| Health satisfaction                                                         | European  | 0.5677  | 0.0574 | 9.8976   | 4.27E-23 | 0.0822 | 0.0056 | 1.0079 | 0.0077 | 0.0024   | 0.0059 |

| Trait                                                                                  | ethnicity | rg      | SE     | z       | p        | h2_obs | se     | h2_int | se     | gcov_int | se     |
|----------------------------------------------------------------------------------------|-----------|---------|--------|---------|----------|--------|--------|--------|--------|----------|--------|
| Age at last live birth                                                                 | European  | -0.5724 | 0.0586 | -9.7703 | 1.51E-22 | 0.0864 | 0.0062 | 1.0218 | 0.0093 | 0.0000   | 0.0060 |
| Usual walking pace                                                                     | European  | -0.4291 | 0.0439 | -9.7689 | 1.53E-22 | 0.0762 | 0.0030 | 1.0389 | 0.0108 | 0.0110   | 0.0061 |
| Ever unenthusiastic/disinterested for a whole week                                     | European  | 0.6562  | 0.0674 | 9.7310  | 2.22E-22 | 0.0572 | 0.0064 | 1.0012 | 0.0080 | 0.0030   | 0.0048 |
| Falls in the last year                                                                 | European  | 0.5270  | 0.0551 | 9.5718  | 1.05E-21 | 0.0328 | 0.0020 | 1.0028 | 0.0080 | -0.0034  | 0.0052 |
| Qualifications: A levels/AS levels or equivalent                                       | European  | -0.4047 | 0.0424 | -9.5521 | 1.27E-21 | 0.0958 | 0.0035 | 1.0585 | 0.0114 | 0.0052   | 0.0069 |
| Qualifications: College or University degree                                           | European  | -0.3461 | 0.0368 | -9.4117 | 4.88E-21 | 0.1675 | 0.0055 | 1.1216 | 0.0149 | -0.0079  | 0.0075 |
| Medication for pain relief constipation heartburn: None of the above                   | European  | -0.4256 | 0.0455 | -9.3548 | 8.37E-21 | 0.0538 | 0.0027 | 1.0325 | 0.0097 | -0.0085  | 0.0052 |
| Mood swings                                                                            | European  | 0.5382  | 0.0577 | 9.3221  | 1.14E-20 | 0.0708 | 0.0035 | 1.0191 | 0.0107 | 0.0110   | 0.0061 |
| Illness injury bereavement stress in last 2 years: None of the above                   | European  | -0.5844 | 0.0628 | -9.3128 | 1.25E-20 | 0.0233 | 0.0017 | 1.0112 | 0.0067 | 0.0022   | 0.0050 |
| Ever smoked                                                                            | European  | 0.4329  | 0.0465 | 9.3094  | 1.29E-20 | 0.0744 | 0.0034 | 1.0275 | 0.0108 | -0.0128  | 0.0060 |
| Qualifications: None of the above                                                      | European  | 0.3991  | 0.0433 | 9.2260  | 2.81E-20 | 0.0974 | 0.0039 | 1.0679 | 0.0117 | 0.0017   | 0.0071 |
| Age started oral contraceptive pill                                                    | European  | -0.6705 | 0.0728 | -9.2123 | 3.19E-20 | 0.0472 | 0.0044 | 1.0190 | 0.0079 | 0.0050   | 0.0057 |
| Pack years adult smoking as proportion of life span exposed to smoking<br>PREVIEW ONLY | European  | 0.5015  | 0.0551 | 9.1083  | 8.37E-20 | 0.1277 | 0.0111 | 1.0141 | 0.0101 | -0.0017  | 0.0058 |
| Pack years of smoking PREVIEW ONLY                                                     | European  | 0.4927  | 0.0563 | 8.7446  | 2.24E-18 | 0.1102 | 0.0100 | 1.0147 | 0.0097 | -0.0022  | 0.0054 |
| Diagnoses - main ICD10: R07 Pain in throat and chest                                   | European  | 0.6131  | 0.0704 | 8.7096  | 3.05E-18 | 0.0162 | 0.0018 | 1.0060 | 0.0076 | 0.0022   | 0.0051 |
| Number of operations self-reported                                                     | European  | 0.4652  | 0.0543 | 8.5717  | 1.02E-17 | 0.0379 | 0.0023 | 1.0390 | 0.0080 | -0.0013  | 0.0058 |
| Types of physical activity in last 4 weeks: None of the above                          | European  | 0.5723  | 0.0668 | 8.5617  | 1.11E-17 | 0.0237 | 0.0018 | 1.0195 | 0.0077 | 0.0013   | 0.0055 |
| Exposure to tobacco smoke outside home                                                 | European  | 0.5036  | 0.0599 | 8.4061  | 4.24E-17 | 0.0320 | 0.0025 | 1.0182 | 0.0086 | -0.0088  | 0.0056 |
| Maternal smoking around birth                                                          | European  | 0.4477  | 0.0539 | 8.3006  | 1.04E-16 | 0.0495 | 0.0029 | 1.0378 | 0.0094 | 0.0059   | 0.0059 |
| Pain type(s) experienced in last month: Back pain                                      | European  | 0.4328  | 0.0523 | 8.2747  | 1.29E-16 | 0.0395 | 0.0024 | 1.0233 | 0.0091 | 0.0044   | 0.0059 |
| Smoking status: Previous                                                               | European  | 0.4110  | 0.0499 | 8.2322  | 1.84E-16 | 0.0515 | 0.0031 | 1.0229 | 0.0100 | -0.0041  | 0.0061 |
| Shortness of breath walking on level ground                                            | European  | 0.6551  | 0.0800 | 8.1924  | 2.56E-16 | 0.0488 | 0.0052 | 1.0086 | 0.0069 | -0.0040  | 0.0053 |
| Medication for pain relief constipation heartburn: Omeprazole (e.g. Zantrol)           | European  | 0.5442  | 0.0667 | 8.1592  | 3.37E-16 | 0.0179 | 0.0016 | 1.0215 | 0.0073 | -0.0015  | 0.0049 |
| Non-cancer illness code self-reported: depression                                      | European  | 0.6667  | 0.0821 | 8.1220  | 4.58E-16 | 0.0178 | 0.0018 | 1.0048 | 0.0076 | 0.0073   | 0.0060 |
| Miserableness                                                                          | European  | 0.5310  | 0.0664 | 7.9955  | 1.29E-15 | 0.0640 | 0.0038 | 1.0199 | 0.0115 | 0.0117   | 0.0067 |
| Other serious medical condition/disability diagnosed by doctor                         | European  | 0.4943  | 0.0626 | 7.8971  | 2.85E-15 | 0.0257 | 0.0018 | 1.0093 | 0.0074 | -0.0008  | 0.0051 |
| Wheeze or whistling in the chest in last year                                          | European  | 0.3875  | 0.0496 | 7.8092  | 5.76E-15 | 0.0599 | 0.0032 | 1.0325 | 0.0109 | 0.0133   | 0.0063 |
| Fed-up feelings                                                                        | European  | 0.4557  | 0.0587 | 7.7660  | 8.10E-15 | 0.0719 | 0.0034 | 1.0244 | 0.0104 | 0.0139   | 0.0070 |
| Ever depressed for a whole week                                                        | European  | 0.5635  | 0.0728 | 7.7355  | 1.03E-14 | 0.0625 | 0.0057 | 0.9953 | 0.0077 | 0.0003   | 0.0055 |
| Leg pain on walking                                                                    | European  | 0.5054  | 0.0662 | 7.6391  | 2.19E-14 | 0.0578 | 0.0055 | 1.0081 | 0.0078 | 0.0049   | 0.0057 |
| Sleeplessness / insomnia                                                               | European  | 0.3972  | 0.0520 | 7.6366  | 2.23E-14 | 0.0629 | 0.0028 | 1.0157 | 0.0097 | -0.0010  | 0.0062 |
| Pain type(s) experienced in last month: Knee pain                                      | European  | 0.4144  | 0.0547 | 7.5742  | 3.61E-14 | 0.0405 | 0.0024 | 1.0156 | 0.0088 | -0.0025  | 0.0063 |
| Leg fat percentage (right)                                                             | European  | 0.2703  | 0.0358 | 7.5585  | 4.08E-14 | 0.2082 | 0.0065 | 1.0816 | 0.0173 | 0.0063   | 0.0074 |



| Trait                                                                                                                | ethnicity | rg      | SE     | z       | p        | h2_obs | se     | h2_int | se     | gcov_int | se     |
|----------------------------------------------------------------------------------------------------------------------|-----------|---------|--------|---------|----------|--------|--------|--------|--------|----------|--------|
| Medication for pain relief constipation heartburn: Paracetamol                                                       | European  | 0.3993  | 0.0531 | 7.5180  | 5.56E-14 | 0.0428 | 0.0025 | 1.0283 | 0.0086 | 0.0014   | 0.0052 |
| Alcohol drinker status: Previous                                                                                     | European  | 0.6651  | 0.0887 | 7.4953  | 6.61E-14 | 0.0130 | 0.0016 | 1.0083 | 0.0074 | -0.0054  | 0.0051 |
| Types of physical activity in last 4 weeks: Other exercises (eg: swimming cycling keep fit bowling)                  | European  | -0.3858 | 0.0517 | -7.4694 | 8.05E-14 | 0.0470 | 0.0022 | 1.0108 | 0.0088 | -0.0050  | 0.0058 |
| Job involves heavy manual or physical work                                                                           | European  | 0.3820  | 0.0513 | 7.4532  | 9.11E-14 | 0.0860 | 0.0046 | 1.0397 | 0.0094 | -0.0005  | 0.0061 |
| Pain type(s) experienced in last month: Hip pain                                                                     | European  | 0.4567  | 0.0617 | 7.4053  | 1.31E-13 | 0.0236 | 0.0020 | 1.0189 | 0.0077 | -0.0079  | 0.0052 |
| Leg fat percentage (left)                                                                                            | European  | 0.2662  | 0.0360 | 7.4019  | 1.34E-13 | 0.2078 | 0.0065 | 1.0864 | 0.0176 | 0.0068   | 0.0074 |
| Ever used hormone-replacement therapy (HRT)                                                                          | European  | 0.4356  | 0.0590 | 7.3870  | 1.50E-13 | 0.0407 | 0.0033 | 0.9995 | 0.0075 | 0.0068   | 0.0049 |
| Neuroticism score                                                                                                    | European  | 0.4740  | 0.0648 | 7.3108  | 2.66E-13 | 0.1184 | 0.0065 | 1.0178 | 0.0146 | 0.0094   | 0.0073 |
| Alcohol usually taken with meals                                                                                     | European  | -0.3958 | 0.0543 | -7.2870 | 3.17E-13 | 0.1086 | 0.0051 | 1.0640 | 0.0097 | -0.0081  | 0.0065 |
| Tense / highly strung                                                                                                | European  | 0.5069  | 0.0698 | 7.2654  | 3.72E-13 | 0.0572 | 0.0034 | 0.9962 | 0.0108 | -0.0005  | 0.0068 |
| Mouth/teeth dental problems: None of the above                                                                       | European  | -0.4398 | 0.0608 | -7.2364 | 4.61E-13 | 0.0379 | 0.0021 | 1.0158 | 0.0083 | 0.0076   | 0.0062 |
| Illnesses of siblings: None of the above (group 1)                                                                   | European  | -0.4020 | 0.0560 | -7.1771 | 7.12E-13 | 0.0363 | 0.0026 | 1.0141 | 0.0076 | -0.0040  | 0.0049 |
| Pain type(s) experienced in last month: Pain all over the body                                                       | European  | 0.6924  | 0.0967 | 7.1595  | 8.10E-13 | 0.0100 | 0.0016 | 1.0058 | 0.0072 | 0.0014   | 0.0050 |
| Ever highly irritable/argumentative for 2 days                                                                       | European  | 0.5429  | 0.0758 | 7.1586  | 8.15E-13 | 0.0527 | 0.0056 | 0.9968 | 0.0075 | 0.0080   | 0.0053 |
| Vascular/heart problems diagnosed by doctor: Angina                                                                  | European  | 0.4350  | 0.0619 | 7.0299  | 2.07E-12 | 0.0218 | 0.0021 | 1.0276 | 0.0079 | -0.0025  | 0.0050 |
| Financial situation satisfaction                                                                                     | European  | 0.4904  | 0.0713 | 6.8821  | 5.90E-12 | 0.0578 | 0.0060 | 1.0048 | 0.0080 | 0.0023   | 0.0056 |
| Diagnoses - main ICD10: R10 Abdominal and pelvic pain                                                                | European  | 0.5807  | 0.0852 | 6.8186  | 9.19E-12 | 0.0127 | 0.0016 | 0.9915 | 0.0072 | -0.0043  | 0.0054 |
| Illness injury bereavement stress in last 2 years: Serious illness injury or assault to yourself                     | European  | 0.5750  | 0.0844 | 6.8131  | 9.55E-12 | 0.0144 | 0.0016 | 1.0098 | 0.0070 | -0.0049  | 0.0050 |
| Non-cancer illness code self-reported: angina                                                                        | European  | 0.4248  | 0.0629 | 6.7551  | 1.43E-11 | 0.0224 | 0.0021 | 1.0243 | 0.0079 | -0.0018  | 0.0050 |
| Qualifications: O levels/GCSEs or equivalent                                                                         | European  | -0.3620 | 0.0541 | -6.6957 | 2.15E-11 | 0.0491 | 0.0024 | 1.0136 | 0.0096 | 0.0039   | 0.0061 |
| Noisy workplace                                                                                                      | European  | 0.4771  | 0.0725 | 6.5839  | 4.58E-11 | 0.0617 | 0.0060 | 1.0282 | 0.0079 | -0.0006  | 0.0055 |
| Mouth/teeth dental problems: Dentures                                                                                | European  | 0.3550  | 0.0541 | 6.5674  | 5.12E-11 | 0.0482 | 0.0028 | 1.0357 | 0.0101 | -0.0041  | 0.0060 |
| Sensitivity / hurt feelings                                                                                          | European  | 0.3678  | 0.0561 | 6.5529  | 5.64E-11 | 0.0636 | 0.0032 | 1.0158 | 0.0098 | 0.0033   | 0.0065 |
| Blood clot DVT bronchitis emphysema asthma rhinitis eczema allergy diagnosed by doctor: Emphysema/chronic bronchitis | European  | 0.5827  | 0.0891 | 6.5367  | 6.29E-11 | 0.0126 | 0.0017 | 0.9858 | 0.0078 | -0.0014  | 0.0056 |
| Pain type(s) experienced in last month: Stomach or abdominal pain                                                    | European  | 0.5042  | 0.0776 | 6.4994  | 8.07E-11 | 0.0213 | 0.0017 | 1.0085 | 0.0074 | 0.0038   | 0.0057 |
| Body mass index (BMI)                                                                                                | European  | 0.2409  | 0.0371 | 6.4991  | 8.08E-11 | 0.2477 | 0.0092 | 1.0736 | 0.0206 | 0.0044   | 0.0076 |
| Non-cancer illness code self-reported: osteoarthritis                                                                | European  | 0.4849  | 0.0748 | 6.4789  | 9.24E-11 | 0.0190 | 0.0018 | 1.0280 | 0.0081 | -0.0028  | 0.0056 |
| Tobacco smoking: Ex-smoker                                                                                           | European  | 0.5056  | 0.0785 | 6.4419  | 1.18E-10 | 0.0771 | 0.0083 | 1.0082 | 0.0083 | 0.0023   | 0.0057 |
| Non-cancer illness code self-reported: emphysema/chronic bronchitis                                                  | European  | 0.6026  | 0.0937 | 6.4306  | 1.27E-10 | 0.0099 | 0.0016 | 0.9872 | 0.0074 | -0.0009  | 0.0055 |
| Number of full sisters                                                                                               | European  | 0.4685  | 0.0734 | 6.3807  | 1.76E-10 | 0.0186 | 0.0018 | 1.0404 | 0.0071 | 0.0029   | 0.0053 |
| Types of physical activity in last 4 weeks: Walking for pleasure (not as a means of transport)                       | European  | -0.3566 | 0.0562 | -6.3420 | 2.27E-10 | 0.0367 | 0.0023 | 1.0443 | 0.0087 | -0.0029  | 0.0061 |

| Trait                                                                                                          | ethnicity | rg      | SE     | z       | p        | h2_obs | se     | h2_int | se     | gcov_int | se     |
|----------------------------------------------------------------------------------------------------------------|-----------|---------|--------|---------|----------|--------|--------|--------|--------|----------|--------|
| Ever had stillbirth spontaneous miscarriage or termination                                                     | European  | 0.6046  | 0.0964 | 6.2723  | 3.56E-10 | 0.0199 | 0.0033 | 0.9957 | 0.0080 | -0.0071  | 0.0055 |
| Illnesses of father: Chronic bronchitis/emphysema                                                              | European  | 0.5278  | 0.0843 | 6.2590  | 3.87E-10 | 0.0151 | 0.0020 | 1.0224 | 0.0073 | -0.0001  | 0.0056 |
| Job involves shift work                                                                                        | European  | 0.4159  | 0.0670 | 6.2073  | 5.39E-10 | 0.0308 | 0.0029 | 1.0012 | 0.0067 | -0.0046  | 0.0048 |
| Types of physical activity in last 4 weeks: Heavy DIY (eg: weeding lawn mowing carpentry digging)              | European  | -0.3629 | 0.0585 | -6.2072 | 5.39E-10 | 0.0339 | 0.0020 | 1.0082 | 0.0076 | -0.0024  | 0.0061 |
| Guilty feelings                                                                                                | European  | 0.3740  | 0.0606 | 6.1698  | 6.84E-10 | 0.0520 | 0.0027 | 1.0032 | 0.0088 | 0.0071   | 0.0065 |
| Fluid intelligence score                                                                                       | European  | -0.2650 | 0.0432 | -6.1406 | 8.22E-10 | 0.2375 | 0.0109 | 1.0430 | 0.0105 | 0.0022   | 0.0063 |
| Arm fat percentage (right)                                                                                     | European  | 0.2266  | 0.0369 | 6.1394  | 8.29E-10 | 0.2153 | 0.0078 | 1.0828 | 0.0192 | 0.0062   | 0.0070 |
| Mothers age at death                                                                                           | European  | -0.5318 | 0.0870 | -6.1120 | 9.84E-10 | 0.0249 | 0.0030 | 1.0262 | 0.0077 | -0.0020  | 0.0059 |
| Leg fat mass (right)                                                                                           | European  | 0.2242  | 0.0368 | 6.0995  | 1.06E-09 | 0.2310 | 0.0084 | 1.0699 | 0.0193 | 0.0087   | 0.0074 |
| Body fat percentage                                                                                            | European  | 0.2187  | 0.0364 | 6.0086  | 1.87E-09 | 0.2160 | 0.0075 | 1.0874 | 0.0191 | 0.0064   | 0.0073 |
| Pain type(s) experienced in last month: Headache                                                               | European  | 0.3472  | 0.0578 | 6.0061  | 1.90E-09 | 0.0445 | 0.0027 | 1.0072 | 0.0094 | 0.0051   | 0.0063 |
| Leg fat mass (left)                                                                                            | European  | 0.2196  | 0.0367 | 5.9861  | 2.15E-09 | 0.2317 | 0.0085 | 1.0719 | 0.0194 | 0.0088   | 0.0073 |
| Exposure to tobacco smoke at home                                                                              | European  | 0.5289  | 0.0885 | 5.9786  | 2.25E-09 | 0.0118 | 0.0017 | 0.9983 | 0.0064 | 0.0000   | 0.0052 |
| Illnesses of siblings: Severe depression                                                                       | European  | 0.4821  | 0.0808 | 5.9691  | 2.39E-09 | 0.0143 | 0.0019 | 1.0036 | 0.0070 | 0.0020   | 0.0044 |
| Arm fat percentage (left)                                                                                      | European  | 0.2213  | 0.0372 | 5.9530  | 2.63E-09 | 0.2189 | 0.0080 | 1.0772 | 0.0193 | 0.0042   | 0.0071 |
| Forced vital capacity (FVC) Best measure                                                                       | European  | -0.2106 | 0.0358 | -5.8789 | 4.13E-09 | 0.1899 | 0.0088 | 1.0775 | 0.0174 | 0.0036   | 0.0068 |
| Medication for cholesterol blood pressure diabetes or take exogenous hormones: None of the above               | European  | -0.3422 | 0.0583 | -5.8737 | 4.26E-09 | 0.0664 | 0.0047 | 1.0174 | 0.0099 | 0.0072   | 0.0060 |
| Qualifications: NVQ or HND or HNC or equivalent                                                                | European  | 0.4336  | 0.0748 | 5.7972  | 6.74E-09 | 0.0151 | 0.0017 | 1.0104 | 0.0073 | -0.0088  | 0.0051 |
| Had other major operations                                                                                     | European  | 0.4277  | 0.0738 | 5.7968  | 6.76E-09 | 0.0295 | 0.0031 | 1.0129 | 0.0071 | 0.0029   | 0.0053 |
| Standing height                                                                                                | European  | -0.1630 | 0.0281 | -5.7964 | 6.78E-09 | 0.4486 | 0.0236 | 1.2611 | 0.0576 | 0.0085   | 0.0080 |
| Illnesses of mother: Chronic bronchitis/emphysema                                                              | European  | 0.4704  | 0.0814 | 5.7795  | 7.49E-09 | 0.0123 | 0.0019 | 1.0066 | 0.0068 | 0.0056   | 0.0049 |
| Medication for pain relief constipation heartburn: Laxatives (e.g. Dulcolax Senokot)                           | European  | 0.4562  | 0.0792 | 5.7620  | 8.31E-09 | 0.0115 | 0.0016 | 1.0093 | 0.0071 | -0.0029  | 0.0053 |
| Number of full brothers                                                                                        | European  | 0.4265  | 0.0744 | 5.7313  | 9.97E-09 | 0.0190 | 0.0019 | 1.0263 | 0.0072 | 0.0053   | 0.0056 |
| Alcohol intake frequency.                                                                                      | European  | 0.2590  | 0.0458 | 5.6514  | 1.59E-08 | 0.0826 | 0.0043 | 1.0499 | 0.0119 | 0.0120   | 0.0069 |
| Job involves mainly walking or standing                                                                        | European  | 0.2882  | 0.0511 | 5.6426  | 1.68E-08 | 0.0799 | 0.0046 | 1.0312 | 0.0095 | 0.0002   | 0.0057 |
| Qualifications: Other professional qualifications eg: nursing teaching                                         | European  | -0.2659 | 0.0474 | -5.6060 | 2.07E-08 | 0.0470 | 0.0024 | 1.0276 | 0.0090 | -0.0116  | 0.0058 |
| Mouth/teeth dental problems: Loose teeth                                                                       | European  | 0.4476  | 0.0800 | 5.5939  | 2.22E-08 | 0.0147 | 0.0017 | 1.0100 | 0.0071 | -0.0030  | 0.0056 |
| Medication for cholesterol blood pressure diabetes or take exogenous hormones: Cholesterol lowering medication | European  | 0.3476  | 0.0628 | 5.5398  | 3.03E-08 | 0.0512 | 0.0060 | 1.0238 | 0.0150 | -0.0020  | 0.0056 |
| Ever manic/hyper for 2 days                                                                                    | European  | 0.6923  | 0.1284 | 5.3927  | 6.94E-08 | 0.0192 | 0.0049 | 0.9931 | 0.0070 | -0.0083  | 0.0050 |
| Illnesses of siblings: None of the above (group 2)                                                             | European  | -0.5777 | 0.1074 | -5.3787 | 7.50E-08 | 0.0089 | 0.0018 | 1.0030 | 0.0070 | -0.0019  | 0.0043 |
| Forced expiratory volume in 1-second (FEV1) Best measure                                                       | European  | -0.2102 | 0.0396 | -5.3052 | 1.13E-07 | 0.1636 | 0.0076 | 1.0545 | 0.0144 | -0.0005  | 0.0069 |

| Trait                                                                           | ethnicity | rg      | SE     | z       | p        | h2_obs | se     | h2_int | se     | gcov_int | se     |
|---------------------------------------------------------------------------------|-----------|---------|--------|---------|----------|--------|--------|--------|--------|----------|--------|
| Waist circumference                                                             | European  | 0.1990  | 0.0378 | 5.2685  | 1.38E-07 | 0.2002 | 0.0081 | 1.0634 | 0.0191 | 0.0103   | 0.0069 |
| Arm fat mass (right)                                                            | European  | 0.1965  | 0.0374 | 5.2620  | 1.42E-07 | 0.2313 | 0.0089 | 1.0714 | 0.0201 | 0.0081   | 0.0071 |
| Smoking/smokers in household                                                    | European  | 0.5640  | 0.1075 | 5.2438  | 1.57E-07 | 0.0096 | 0.0020 | 1.0142 | 0.0077 | 0.0029   | 0.0054 |
| Non-cancer illness code self-reported: chronic obstructive airways disease/copd | European  | 0.6426  | 0.1233 | 5.2120  | 1.87E-07 | 0.0061 | 0.0015 | 0.9913 | 0.0070 | -0.0140  | 0.0052 |
| Other eye problems                                                              | European  | 0.5062  | 0.0973 | 5.2026  | 1.97E-07 | 0.0094 | 0.0015 | 1.0230 | 0.0073 | 0.0030   | 0.0048 |
| Diabetes diagnosed by doctor                                                    | European  | 0.2764  | 0.0531 | 5.2008  | 1.98E-07 | 0.0434 | 0.0027 | 1.0426 | 0.0113 | -0.0004  | 0.0061 |
| Number of live births                                                           | European  | 0.2771  | 0.0536 | 5.1664  | 2.39E-07 | 0.0612 | 0.0042 | 1.0093 | 0.0086 | -0.0033  | 0.0052 |
| Arm fat mass (left)                                                             | European  | 0.1925  | 0.0373 | 5.1592  | 2.48E-07 | 0.2319 | 0.0089 | 1.0685 | 0.0200 | 0.0073   | 0.0071 |
| Diagnoses - main ICD10: K21 Gastro-oesophageal reflux disease                   | European  | 0.6901  | 0.1341 | 5.1467  | 2.65E-07 | 0.0062 | 0.0013 | 1.0033 | 0.0064 | -0.0101  | 0.0052 |
| Whole body fat mass                                                             | European  | 0.1859  | 0.0363 | 5.1259  | 2.96E-07 | 0.2345 | 0.0087 | 1.0754 | 0.0202 | 0.0089   | 0.0071 |
| Forced expiratory volume in 1-second (FEV1)                                     | European  | -0.2033 | 0.0397 | -5.1223 | 3.02E-07 | 0.1486 | 0.0065 | 1.0614 | 0.0146 | 0.0011   | 0.0069 |
| Number of cigarettes previously smoked daily                                    | European  | 0.3572  | 0.0702 | 5.0874  | 3.63E-07 | 0.0984 | 0.0141 | 1.0048 | 0.0096 | -0.0004  | 0.0052 |
| Fathers age at death                                                            | European  | -0.3414 | 0.0672 | -5.0829 | 3.72E-07 | 0.0345 | 0.0032 | 1.0213 | 0.0079 | -0.0045  | 0.0055 |
| Forced vital capacity (FVC)                                                     | European  | -0.1873 | 0.0369 | -5.0737 | 3.90E-07 | 0.1717 | 0.0077 | 1.0887 | 0.0181 | 0.0032   | 0.0070 |
| Vascular/heart problems diagnosed by doctor: None of the above                  | European  | -0.2088 | 0.0413 | -5.0575 | 4.25E-07 | 0.1143 | 0.0048 | 1.0560 | 0.0157 | -0.0009  | 0.0070 |
| Frequency of stair climbing in last 4 weeks                                     | European  | -0.2791 | 0.0552 | -5.0519 | 4.38E-07 | 0.0348 | 0.0022 | 1.0182 | 0.0077 | 0.0105   | 0.0059 |
| Illnesses of siblings: High blood pressure                                      | European  | 0.2672  | 0.0536 | 4.9889  | 6.07E-07 | 0.0369 | 0.0027 | 1.0054 | 0.0077 | 0.0043   | 0.0046 |
| Diagnoses - main ICD10: M54 Dorsalgia                                           | European  | 0.4683  | 0.0946 | 4.9503  | 7.41E-07 | 0.0104 | 0.0015 | 1.0015 | 0.0069 | 0.0010   | 0.0053 |
| Trunk fat percentage                                                            | European  | 0.1818  | 0.0368 | 4.9383  | 7.88E-07 | 0.2058 | 0.0076 | 1.0893 | 0.0193 | 0.0075   | 0.0072 |
| Hearing difficulty/problems with background noise                               | European  | 0.2540  | 0.0515 | 4.9289  | 8.27E-07 | 0.0516 | 0.0026 | 1.0200 | 0.0090 | 0.0002   | 0.0056 |
| Medication for pain relief constipation heartburn: Aspirin                      | European  | 0.3406  | 0.0696 | 4.8962  | 9.77E-07 | 0.0210 | 0.0020 | 1.0141 | 0.0075 | -0.0011  | 0.0054 |
| Suffer from nerves                                                              | European  | 0.3389  | 0.0694 | 4.8818  | 1.05E-06 | 0.0458 | 0.0034 | 0.9982 | 0.0106 | 0.0069   | 0.0063 |
| Types of transport used (excluding work): Car/motor vehicle                     | European  | -0.3189 | 0.0662 | -4.8183 | 1.45E-06 | 0.0247 | 0.0018 | 1.0072 | 0.0077 | 0.0000   | 0.0059 |
| Former alcohol drinker                                                          | European  | 0.5428  | 0.1131 | 4.8003  | 1.58E-06 | 0.1236 | 0.0215 | 0.9962 | 0.0066 | -0.0084  | 0.0048 |
| Risk taking                                                                     | European  | 0.2409  | 0.0503 | 4.7883  | 1.68E-06 | 0.0554 | 0.0028 | 1.0065 | 0.0098 | 0.0045   | 0.0058 |
| Vascular/heart problems diagnosed by doctor: Heart attack                       | European  | 0.3100  | 0.0650 | 4.7715  | 1.83E-06 | 0.0184 | 0.0019 | 1.0153 | 0.0082 | -0.0003  | 0.0051 |
| Time spent watching television (TV)                                             | European  | 0.2110  | 0.0446 | 4.7269  | 2.28E-06 | 0.0999 | 0.0040 | 1.0539 | 0.0110 | 0.0048   | 0.0065 |
| Alcohol intake versus 10 years previously                                       | European  | 0.2985  | 0.0632 | 4.7238  | 2.31E-06 | 0.0349 | 0.0026 | 1.0288 | 0.0090 | 0.0012   | 0.0060 |
| Hand grip strength (right)                                                      | European  | -0.1802 | 0.0382 | -4.7160 | 2.40E-06 | 0.1039 | 0.0042 | 1.0617 | 0.0137 | 0.0042   | 0.0061 |
| Non-cancer illness code self-reported: heart attack/myocardial infarction       | European  | 0.2975  | 0.0632 | 4.7100  | 2.48E-06 | 0.0189 | 0.0019 | 1.0130 | 0.0081 | 0.0006   | 0.0051 |
| Hearing difficulty/problems: Yes                                                | European  | 0.2296  | 0.0490 | 4.6878  | 2.76E-06 | 0.0421 | 0.0026 | 1.0112 | 0.0096 | 0.0015   | 0.0059 |
| Diagnoses - main ICD10: N92 Excessive frequent and irregular menstruation       | European  | 0.5146  | 0.1103 | 4.6650  | 3.09E-06 | 0.0071 | 0.0018 | 1.0004 | 0.0079 | -0.0013  | 0.0053 |

| Trait                                                                                                                                        | ethnicity | rg      | SE     | z       | p        | h2_obs | se     | h2_int | se     | gcov_int | se     |
|----------------------------------------------------------------------------------------------------------------------------------------------|-----------|---------|--------|---------|----------|--------|--------|--------|--------|----------|--------|
| Frequency of walking for pleasure in last 4 weeks                                                                                            | European  | 0.2914  | 0.0631 | 4.6215  | 3.81E-06 | 0.0340 | 0.0026 | 1.0094 | 0.0079 | 0.0051   | 0.0054 |
| Non-cancer illness code self-reported: diabetes                                                                                              | European  | 0.2788  | 0.0604 | 4.6182  | 3.87E-06 | 0.0354 | 0.0025 | 1.0402 | 0.0109 | -0.0013  | 0.0063 |
| Average weekly champagne plus white wine intake                                                                                              | European  | -0.3143 | 0.0685 | -4.5907 | 4.42E-06 | 0.0300 | 0.0028 | 1.0440 | 0.0084 | -0.0043  | 0.0055 |
| Diagnoses - main ICD10: K29 Gastritis and duodenitis                                                                                         | European  | 0.4949  | 0.1078 | 4.5895  | 4.44E-06 | 0.0074 | 0.0015 | 1.0038 | 0.0066 | 0.0039   | 0.0053 |
| Reason for glasses/contact lenses: For short-sightedness i.e. only or mainly for distance viewing such as driving cinema etc (called myopia) | European  | -0.3273 | 0.0719 | -4.5540 | 5.26E-06 | 0.0248 | 0.0021 | 1.1199 | 0.0090 | 0.0027   | 0.0058 |
| Irritability                                                                                                                                 | European  | 0.3280  | 0.0723 | 4.5386  | 5.66E-06 | 0.0680 | 0.0042 | 0.9927 | 0.0119 | 0.0017   | 0.0077 |
| Trunk fat mass                                                                                                                               | European  | 0.1626  | 0.0361 | 4.5070  | 6.57E-06 | 0.2307 | 0.0086 | 1.0825 | 0.0207 | 0.0084   | 0.0071 |
| Illnesses of siblings: Diabetes                                                                                                              | European  | 0.3152  | 0.0702 | 4.4862  | 7.25E-06 | 0.0206 | 0.0022 | 1.0098 | 0.0069 | 0.0059   | 0.0052 |
| Types of physical activity in last 4 weeks: Light DIY (eg: pruning watering the lawn)                                                        | European  | -0.2536 | 0.0569 | -4.4581 | 8.27E-06 | 0.0397 | 0.0023 | 1.0008 | 0.0091 | -0.0085  | 0.0059 |
| Breastfed as a baby                                                                                                                          | European  | -0.3099 | 0.0700 | -4.4292 | 9.46E-06 | 0.0258 | 0.0024 | 1.0223 | 0.0078 | -0.0050  | 0.0060 |
| Peak expiratory flow (PEF)                                                                                                                   | European  | -0.2178 | 0.0494 | -4.4045 | 1.06E-05 | 0.0897 | 0.0048 | 1.0575 | 0.0129 | 0.0083   | 0.0070 |
| Hand grip strength (left)                                                                                                                    | European  | -0.1728 | 0.0394 | -4.3903 | 1.13E-05 | 0.1044 | 0.0042 | 1.0541 | 0.0122 | 0.0037   | 0.0062 |
| Number of unsuccessful stop-smoking attempts                                                                                                 | European  | 0.3875  | 0.0883 | 4.3891  | 1.14E-05 | 0.0501 | 0.0073 | 1.0063 | 0.0070 | -0.0032  | 0.0054 |
| Back pain for 3+ months                                                                                                                      | European  | 0.4370  | 0.0998 | 4.3778  | 1.20E-05 | 0.0405 | 0.0058 | 0.9916 | 0.0070 | -0.0014  | 0.0056 |
| Loud music exposure frequency                                                                                                                | European  | 0.3960  | 0.0908 | 4.3634  | 1.28E-05 | 0.0287 | 0.0046 | 1.0140 | 0.0072 | 0.0020   | 0.0048 |
| Family relationship satisfaction                                                                                                             | European  | 0.2836  | 0.0656 | 4.3262  | 1.52E-05 | 0.0576 | 0.0049 | 1.0046 | 0.0074 | -0.0015  | 0.0052 |
| Average weekly red wine intake                                                                                                               | European  | -0.2499 | 0.0579 | -4.3182 | 1.57E-05 | 0.0560 | 0.0034 | 1.0153 | 0.0088 | -0.0088  | 0.0061 |
| Ever had hysterectomy (womb removed)                                                                                                         | European  | 0.4203  | 0.0974 | 4.3155  | 1.59E-05 | 0.0217 | 0.0035 | 1.0053 | 0.0081 | 0.0089   | 0.0059 |
| Qualifications: CSEs or equivalent                                                                                                           | European  | 0.2908  | 0.0675 | 4.3072  | 1.65E-05 | 0.0210 | 0.0020 | 1.0587 | 0.0079 | 0.0034   | 0.0052 |
| Chest pain or discomfort walking normally                                                                                                    | European  | 0.4012  | 0.0938 | 4.2767  | 1.90E-05 | 0.0768 | 0.0092 | 1.0065 | 0.0075 | 0.0040   | 0.0059 |
| Illnesses of siblings: Heart disease                                                                                                         | European  | 0.3484  | 0.0817 | 4.2658  | 1.99E-05 | 0.0167 | 0.0022 | 1.0142 | 0.0071 | 0.0068   | 0.0051 |
| Prospective memory result                                                                                                                    | European  | 0.2893  | 0.0679 | 4.2628  | 2.02E-05 | 0.0579 | 0.0051 | 1.0115 | 0.0079 | -0.0013  | 0.0059 |
| Getting up in morning                                                                                                                        | European  | -0.1961 | 0.0466 | -4.2110 | 2.54E-05 | 0.0672 | 0.0032 | 1.0472 | 0.0115 | 0.0054   | 0.0060 |
| Current employment status: In paid employment or self-employed                                                                               | European  | -0.4148 | 0.0989 | -4.1939 | 2.74E-05 | 0.0082 | 0.0015 | 1.0181 | 0.0067 | 0.0052   | 0.0049 |
| Happiness                                                                                                                                    | European  | 0.2635  | 0.0629 | 4.1927  | 2.76E-05 | 0.0601 | 0.0051 | 1.0083 | 0.0076 | 0.0080   | 0.0050 |
| Medication for cholesterol blood pressure diabetes or take exogenous hormones: Hormone replacement therapy                                   | European  | 0.4108  | 0.0980 | 4.1899  | 2.79E-05 | 0.0157 | 0.0027 | 1.0010 | 0.0067 | -0.0007  | 0.0051 |
| Non-cancer illness code self-reported: gastro-oesophageal reflux (gord) / gastric reflux                                                     | European  | 0.3659  | 0.0877 | 4.1746  | 2.98E-05 | 0.0114 | 0.0017 | 1.0138 | 0.0075 | -0.0033  | 0.0057 |
| Impedance of arm (left)                                                                                                                      | European  | -0.1505 | 0.0361 | -4.1705 | 3.04E-05 | 0.2328 | 0.0089 | 1.1013 | 0.0238 | -0.0004  | 0.0078 |
| Pain type(s) experienced in last month: Facial pain                                                                                          | European  | 0.6085  | 0.1476 | 4.1216  | 3.76E-05 | 0.0069 | 0.0016 | 0.9965 | 0.0069 | -0.0048  | 0.0054 |
| Forced expiratory volume in 1-second (FEV1) predicted                                                                                        | European  | -0.1825 | 0.0446 | -4.0947 | 4.23E-05 | 0.1723 | 0.0130 | 1.0386 | 0.0126 | 0.0092   | 0.0058 |
| Mouth/teeth dental problems: Painful gums                                                                                                    | European  | 0.5326  | 0.1301 | 4.0944  | 4.23E-05 | 0.0070 | 0.0015 | 1.0039 | 0.0069 | -0.0045  | 0.0049 |

| Trait                                                                                                          | ethnicity | rg      | SE     | z       | p        | h2_obs | se     | h2_int | se     | gcov_int | se     |
|----------------------------------------------------------------------------------------------------------------|-----------|---------|--------|---------|----------|--------|--------|--------|--------|----------|--------|
| Forced expiratory volume in 1-second (FEV1) predicted percentage                                               | European  | -0.1927 | 0.0475 | -4.0545 | 5.02E-05 | 0.2023 | 0.0102 | 1.0332 | 0.0102 | -0.0036  | 0.0061 |
| Bilateral oophorectomy (both ovaries removed)                                                                  | European  | 0.3580  | 0.0883 | 4.0543  | 5.03E-05 | 0.0212 | 0.0032 | 1.0110 | 0.0076 | 0.0075   | 0.0053 |
| Illness injury bereavement stress in last 2 years: Marital separation/divorce                                  | European  | 0.6151  | 0.1536 | 4.0038  | 6.23E-05 | 0.0044 | 0.0015 | 1.0081 | 0.0074 | 0.0008   | 0.0051 |
| Average weekly beer plus cider intake                                                                          | European  | 0.2711  | 0.0679 | 3.9932  | 6.52E-05 | 0.0515 | 0.0035 | 1.0626 | 0.0096 | -0.0032  | 0.0061 |
| Current employment status: Doing unpaid or voluntary work                                                      | European  | -0.3868 | 0.0969 | -3.9906 | 6.59E-05 | 0.0089 | 0.0015 | 1.0105 | 0.0073 | 0.0034   | 0.0049 |
| Adopted as a child                                                                                             | European  | 0.5097  | 0.1287 | 3.9605  | 7.48E-05 | 0.0055 | 0.0014 | 1.0037 | 0.0067 | 0.0060   | 0.0053 |
| Number of cigarettes currently smoked daily (current cigarette smokers)                                        | European  | 0.4547  | 0.1152 | 3.9482  | 7.87E-05 | 0.1042 | 0.0264 | 0.9998 | 0.0077 | -0.0071  | 0.0057 |
| Time from waking to first cigarette                                                                            | European  | -0.4824 | 0.1225 | -3.9393 | 8.17E-05 | 0.0913 | 0.0258 | 1.0128 | 0.0078 | -0.0001  | 0.0054 |
| Vascular/heart problems diagnosed by doctor: High blood pressure                                               | European  | 0.1695  | 0.0434 | 3.9017  | 9.55E-05 | 0.1176 | 0.0051 | 1.0558 | 0.0168 | 0.0023   | 0.0072 |
| Non-cancer illness code self-reported: hypertension                                                            | European  | 0.1684  | 0.0434 | 3.8835  | 1.00E-04 | 0.1161 | 0.0051 | 1.0498 | 0.0169 | 0.0020   | 0.0070 |
| Non-cancer illness code self-reported: pulmonary embolism +/- dvt                                              | European  | 0.5331  | 0.1378 | 3.8675  | 1.00E-04 | 0.0052 | 0.0015 | 1.0104 | 0.0074 | -0.0123  | 0.0050 |
| Blood clot DVT bronchitis emphysema asthma rhinitis eczema allergy diagnosed by doctor: Blood clot in the lung | European  | 0.4960  | 0.1307 | 3.7946  | 1.00E-04 | 0.0056 | 0.0015 | 1.0109 | 0.0075 | -0.0119  | 0.0050 |
| Medication for cholesterol blood pressure diabetes or take exogenous hormones: Blood pressure medication       | European  | 0.2140  | 0.0558 | 3.8390  | 1.00E-04 | 0.1056 | 0.0067 | 1.0309 | 0.0126 | -0.0099  | 0.0067 |
| Types of transport used (excluding work): Cycle                                                                | European  | -0.2370 | 0.0613 | -3.8642 | 1.00E-04 | 0.0252 | 0.0018 | 1.0231 | 0.0072 | -0.0091  | 0.0056 |
| Diagnoses - main ICD10: J44 Other chronic obstructive pulmonary disease                                        | European  | 0.5457  | 0.1404 | 3.8863  | 1.00E-04 | 0.0046 | 0.0014 | 0.9961 | 0.0069 | -0.0019  | 0.0051 |
| Average weekly fortified wine intake                                                                           | European  | -0.3519 | 0.0940 | -3.7455 | 2.00E-04 | 0.0126 | 0.0022 | 1.0180 | 0.0073 | 0.0023   | 0.0054 |
| Nervous feelings                                                                                               | European  | 0.2613  | 0.0706 | 3.6991  | 2.00E-04 | 0.0670 | 0.0044 | 1.0102 | 0.0134 | 0.0015   | 0.0069 |
| Wears glasses or contact lenses                                                                                | European  | -0.2721 | 0.0727 | -3.7453 | 2.00E-04 | 0.0157 | 0.0016 | 1.0037 | 0.0076 | 0.0123   | 0.0053 |
| Duration of heavy DIY                                                                                          | European  | 0.3017  | 0.0813 | 3.7128  | 2.00E-04 | 0.0336 | 0.0039 | 1.0075 | 0.0074 | -0.0052  | 0.0055 |
| Difficulty not smoking for 1 day                                                                               | European  | 0.3810  | 0.1037 | 3.6723  | 2.00E-04 | 0.1194 | 0.0224 | 0.9853 | 0.0066 | -0.0071  | 0.0054 |
| Sitting height                                                                                                 | European  | -0.1091 | 0.0296 | -3.6806 | 2.00E-04 | 0.3197 | 0.0188 | 1.1457 | 0.0438 | 0.0064   | 0.0070 |
| Impedance of arm (right)                                                                                       | European  | -0.1374 | 0.0368 | -3.7346 | 2.00E-04 | 0.2364 | 0.0089 | 1.0844 | 0.0234 | 0.0019   | 0.0077 |
| Non-cancer illness code self-reported: high cholesterol                                                        | European  | 0.2059  | 0.0546 | 3.7714  | 2.00E-04 | 0.0399 | 0.0058 | 1.0595 | 0.0297 | 0.0012   | 0.0060 |
| Tinnitus: Yes but not now but have in the past                                                                 | European  | 0.4706  | 0.1262 | 3.7305  | 2.00E-04 | 0.0182 | 0.0042 | 0.9916 | 0.0068 | -0.0035  | 0.0052 |
| Mouth/teeth dental problems: Bleeding gums                                                                     | European  | 0.2590  | 0.0698 | 3.7119  | 2.00E-04 | 0.0226 | 0.0018 | 1.0095 | 0.0076 | -0.0085  | 0.0056 |
| Why stopped smoking: Doctors advice                                                                            | European  | 0.6505  | 0.1751 | 3.7146  | 2.00E-04 | 0.0160 | 0.0050 | 1.0014 | 0.0061 | -0.0020  | 0.0049 |
| Diagnoses - main ICD10: K44 Diaphragmatic hernia                                                               | European  | 0.4847  | 0.1283 | 3.7775  | 2.00E-04 | 0.0046 | 0.0013 | 1.0089 | 0.0067 | -0.0013  | 0.0050 |
| Non-cancer illness code self-reported: back problem                                                            | European  | 0.4164  | 0.1162 | 3.5839  | 3.00E-04 | 0.0052 | 0.0013 | 1.0043 | 0.0065 | -0.0046  | 0.0053 |
| Transport type for commuting to job workplace: Cycle                                                           | European  | -0.2531 | 0.0694 | -3.6495 | 3.00E-04 | 0.0309 | 0.0033 | 1.0179 | 0.0071 | -0.0039  | 0.0054 |
| Blood clot DVT bronchitis emphysema asthma rhinitis eczema allergy diagnosed by doctor: Asthma                 | European  | 0.1675  | 0.0459 | 3.6475  | 3.00E-04 | 0.0575 | 0.0059 | 1.0253 | 0.0159 | 0.0082   | 0.0059 |
| Diagnoses - main ICD10: M17 Gonarthrosis [arthrosis of knee]                                                   | European  | 0.2930  | 0.0808 | 3.6264  | 3.00E-04 | 0.0141 | 0.0018 | 1.0055 | 0.0079 | -0.0005  | 0.0057 |

| Trait                                                                                                               | ethnicity | rg      | SE     | z       | p        | h2_obs | se     | h2_int | se     | gcov_int | se     |
|---------------------------------------------------------------------------------------------------------------------|-----------|---------|--------|---------|----------|--------|--------|--------|--------|----------|--------|
| Hip circumference                                                                                                   | European  | 0.1323  | 0.0372 | 3.5567  | 4.00E-04 | 0.2172 | 0.0093 | 1.0831 | 0.0205 | 0.0063   | 0.0071 |
| Had major operations                                                                                                | European  | 0.2847  | 0.0805 | 3.5341  | 4.00E-04 | 0.0252 | 0.0037 | 1.0049 | 0.0075 | 0.0050   | 0.0054 |
| Work/job satisfaction                                                                                               | European  | 0.3037  | 0.0860 | 3.5311  | 4.00E-04 | 0.0477 | 0.0071 | 0.9961 | 0.0068 | -0.0075  | 0.0051 |
| Non-cancer illness code self-reported: asthma                                                                       | European  | 0.1679  | 0.0471 | 3.5631  | 4.00E-04 | 0.0581 | 0.0060 | 1.0266 | 0.0158 | 0.0079   | 0.0061 |
| Non-cancer illness code self-reported: anxiety/panic attacks                                                        | European  | 0.3954  | 0.1125 | 3.5140  | 4.00E-04 | 0.0061 | 0.0012 | 0.9994 | 0.0059 | 0.0085   | 0.0051 |
| Transport type for commuting to job workplace: Public transport                                                     | European  | -0.2698 | 0.0766 | -3.5236 | 4.00E-04 | 0.0318 | 0.0035 | 1.0243 | 0.0077 | 0.0070   | 0.0055 |
| Diagnoses - main ICD10: I20 Angina pectoris                                                                         | European  | 0.3933  | 0.1104 | 3.5608  | 4.00E-04 | 0.0087 | 0.0016 | 1.0065 | 0.0073 | 0.0038   | 0.0050 |
| Duration of walks                                                                                                   | European  | 0.1871  | 0.0537 | 3.4847  | 5.00E-04 | 0.0463 | 0.0029 | 1.0085 | 0.0091 | 0.0045   | 0.0058 |
| Neck/shoulder pain for 3+ months                                                                                    | European  | 0.5926  | 0.1706 | 3.4735  | 5.00E-04 | 0.0197 | 0.0064 | 1.0104 | 0.0073 | -0.0007  | 0.0048 |
| Weight                                                                                                              | European  | 0.1226  | 0.0350 | 3.4993  | 5.00E-04 | 0.2655 | 0.0107 | 1.0858 | 0.0244 | 0.0090   | 0.0070 |
| Non-cancer illness code self-reported: diverticular disease/diverticulitis                                          | European  | 0.2732  | 0.0783 | 3.4876  | 5.00E-04 | 0.0128 | 0.0017 | 0.9932 | 0.0073 | -0.0005  | 0.0050 |
| Illnesses of mother: Diabetes                                                                                       | European  | 0.2300  | 0.0664 | 3.4635  | 5.00E-04 | 0.0199 | 0.0020 | 1.0211 | 0.0093 | -0.0012  | 0.0054 |
| Illness injury bereavement stress in last 2 years: Death of a close relative                                        | European  | 0.3966  | 0.1134 | 3.4974  | 5.00E-04 | 0.0064 | 0.0016 | 1.0036 | 0.0070 | -0.0015  | 0.0049 |
| Types of transport used (excluding work): Walk                                                                      | European  | -0.2039 | 0.0584 | -3.4947 | 5.00E-04 | 0.0328 | 0.0023 | 1.0367 | 0.0092 | -0.0047  | 0.0058 |
| Diagnoses - main ICD10: K52 Other non-infective gastro-enteritis and colitis                                        | European  | 0.4867  | 0.1398 | 3.4824  | 5.00E-04 | 0.0050 | 0.0013 | 1.0025 | 0.0062 | 0.0008   | 0.0056 |
| Illnesses of mother: Heart disease                                                                                  | European  | 0.2506  | 0.0729 | 3.4366  | 6.00E-04 | 0.0157 | 0.0019 | 1.0109 | 0.0073 | 0.0042   | 0.0053 |
| Duration walking for pleasure                                                                                       | European  | -0.2264 | 0.0672 | -3.3673 | 8.00E-04 | 0.0247 | 0.0025 | 1.0140 | 0.0073 | -0.0009  | 0.0047 |
| Worrier / anxious feelings                                                                                          | European  | 0.2312  | 0.0692 | 3.3406  | 8.00E-04 | 0.0793 | 0.0052 | 1.0021 | 0.0135 | 0.0072   | 0.0074 |
| Light smokers at least 100 smokes in lifetime                                                                       | European  | 0.2047  | 0.0610 | 3.3570  | 8.00E-04 | 0.0778 | 0.0075 | 1.0042 | 0.0076 | 0.0027   | 0.0055 |
| Worry too long after embarrassment                                                                                  | European  | 0.1889  | 0.0572 | 3.3008  | 1.00E-03 | 0.0644 | 0.0036 | 1.0210 | 0.0114 | 0.0001   | 0.0069 |
| Impedance of whole body                                                                                             | European  | -0.1181 | 0.0360 | -3.2770 | 1.00E-03 | 0.2591 | 0.0103 | 1.0868 | 0.0242 | 0.0014   | 0.0080 |
| Drive faster than motorway speed limit                                                                              | European  | -0.1807 | 0.0552 | -3.2707 | 1.10E-03 | 0.0567 | 0.0027 | 1.0292 | 0.0090 | -0.0055  | 0.0061 |
| Blood clot DVT bronchitis emphysema asthma rhinitis eczema allergy diagnosed by doctor: Blood clot in the leg (DVT) | European  | 0.3150  | 0.0965 | 3.2628  | 1.10E-03 | 0.0104 | 0.0017 | 1.0126 | 0.0099 | -0.0030  | 0.0054 |
| Knee pain for 3+ months                                                                                             | European  | 0.4207  | 0.1316 | 3.1968  | 1.40E-03 | 0.0243 | 0.0069 | 1.0037 | 0.0070 | 0.0052   | 0.0050 |
| Bring up phlegm/sputum/mucus on most days                                                                           | European  | 0.3483  | 0.1092 | 3.1889  | 1.40E-03 | 0.0260 | 0.0061 | 1.0088 | 0.0077 | 0.0050   | 0.0052 |
| Mouth/teeth dental problems: Toothache                                                                              | European  | 0.3499  | 0.1093 | 3.1999  | 1.40E-03 | 0.0084 | 0.0016 | 1.0046 | 0.0077 | -0.0026  | 0.0055 |
| Comparative height size at age 10                                                                                   | European  | -0.1024 | 0.0327 | -3.1320 | 1.70E-03 | 0.2406 | 0.0125 | 1.1165 | 0.0345 | 0.0156   | 0.0071 |
| Diagnoses - main ICD10: K62 Other diseases of anus and rectum                                                       | European  | 0.4245  | 0.1350 | 3.1446  | 1.70E-03 | 0.0051 | 0.0014 | 1.0012 | 0.0067 | 0.0029   | 0.0052 |
| Daytime dozing / sleeping (narcolepsy)                                                                              | European  | 0.1621  | 0.0523 | 3.0965  | 2.00E-03 | 0.0483 | 0.0028 | 1.0122 | 0.0092 | 0.0006   | 0.0061 |
| Fractured/broken bones in last 5 years                                                                              | European  | 0.2108  | 0.0682 | 3.0928  | 2.00E-03 | 0.0183 | 0.0022 | 1.0107 | 0.0080 | 0.0052   | 0.0051 |
| Non-cancer illness code self-reported: deep venous thrombosis (dvt)                                                 | European  | 0.2962  | 0.0959 | 3.0892  | 2.00E-03 | 0.0109 | 0.0018 | 1.0101 | 0.0098 | -0.0017  | 0.0055 |
| Illnesses of father: None of the above (group 1)                                                                    | European  | -0.2684 | 0.0868 | -3.0914 | 2.00E-03 | 0.0145 | 0.0018 | 1.0250 | 0.0073 | -0.0013  | 0.0054 |

| Trait                                                                                  | ethnicity | rg      | SE     | z       | p        | h2_obs | se     | h2_int | se     | gcov_int | se     |
|----------------------------------------------------------------------------------------|-----------|---------|--------|---------|----------|--------|--------|--------|--------|----------|--------|
| Types of physical activity in last 4 weeks: Strenuous sports                           | European  | -0.1926 | 0.0623 | -3.0909 | 2.00E-03 | 0.0219 | 0.0018 | 1.0123 | 0.0071 | -0.0102  | 0.0056 |
| Medication for cholesterol blood pressure or diabetes: Cholesterol lowering medication | European  | 0.1598  | 0.0519 | 3.0754  | 2.10E-03 | 0.0671 | 0.0068 | 1.0372 | 0.0152 | 0.0063   | 0.0054 |
| Frequency of travelling from home to job workplace                                     | European  | 0.2466  | 0.0805 | 3.0638  | 2.20E-03 | 0.0214 | 0.0028 | 1.0191 | 0.0068 | -0.0022  | 0.0052 |
| Non-cancer illness code self-reported: hiatus hernia                                   | European  | 0.3017  | 0.0987 | 3.0581  | 2.20E-03 | 0.0082 | 0.0014 | 1.0332 | 0.0064 | 0.0099   | 0.0052 |
| Medication for pain relief constipation heartburn: Ibuprofen (e.g. Nurofen)            | European  | 0.2180  | 0.0711 | 3.0657  | 2.20E-03 | 0.0226 | 0.0017 | 0.9974 | 0.0067 | 0.0065   | 0.0053 |
| Weight change compared with 1 year ago                                                 | European  | 0.2960  | 0.0971 | 3.0470  | 2.30E-03 | 0.0084 | 0.0014 | 1.0234 | 0.0067 | 0.0005   | 0.0050 |
| Number of incorrect matches in round                                                   | European  | 0.1453  | 0.0481 | 3.0204  | 2.50E-03 | 0.0544 | 0.0028 | 1.0056 | 0.0097 | -0.0010  | 0.0057 |
| Illnesses of father: Lung cancer                                                       | European  | 0.2645  | 0.0877 | 3.0146  | 2.60E-03 | 0.0148 | 0.0020 | 0.9932 | 0.0076 | 0.0074   | 0.0056 |
| Diagnoses - main ICD10: G56 Mononeuropathies of upper limb                             | European  | 0.2511  | 0.0837 | 2.9994  | 2.70E-03 | 0.0139 | 0.0019 | 1.0082 | 0.0078 | 0.0018   | 0.0050 |
| Diagnoses - main ICD10: R55 Syncope and collapse                                       | European  | 0.3426  | 0.1143 | 2.9969  | 2.70E-03 | 0.0056 | 0.0014 | 1.0068 | 0.0069 | 0.0020   | 0.0053 |
| Sodium in urine                                                                        | European  | 0.1353  | 0.0452 | 2.9921  | 2.80E-03 | 0.0722 | 0.0028 | 1.0245 | 0.0094 | 0.0041   | 0.0062 |
| Illnesses of siblings: Stroke                                                          | European  | 0.4852  | 0.1636 | 2.9656  | 3.00E-03 | 0.0046 | 0.0019 | 1.0061 | 0.0066 | -0.0041  | 0.0051 |
| Current employment status: Looking after home and/or family                            | European  | -0.3276 | 0.1109 | -2.9531 | 3.10E-03 | 0.0060 | 0.0014 | 1.0017 | 0.0067 | 0.0061   | 0.0051 |
| Why reduced smoking: Illness or ill health                                             | European  | 0.5236  | 0.1772 | 2.9550  | 3.10E-03 | 0.1129 | 0.0428 | 0.9974 | 0.0063 | -0.0016  | 0.0052 |
| Duration of light DIY                                                                  | European  | 0.2027  | 0.0688 | 2.9448  | 3.20E-03 | 0.0356 | 0.0035 | 1.0018 | 0.0080 | -0.0016  | 0.0052 |
| Diagnoses - main ICD10: K57 Diverticular disease of intestine                          | European  | 0.2142  | 0.0734 | 2.9195  | 3.50E-03 | 0.0131 | 0.0015 | 1.0036 | 0.0068 | 0.0022   | 0.0052 |
| Non-cancer illness code self-reported: hayfever/allergic rhinitis                      | European  | -0.1917 | 0.0660 | -2.9060 | 3.70E-03 | 0.0233 | 0.0025 | 1.0162 | 0.0091 | 0.0034   | 0.0058 |
| Diagnoses - main ICD10: I83 Varicose veins of lower extremities                        | European  | 0.2223  | 0.0772 | 2.8799  | 4.00E-03 | 0.0190 | 0.0022 | 1.0355 | 0.0101 | -0.0022  | 0.0056 |
| Maximum workload during fitness test                                                   | European  | -0.3219 | 0.1129 | -2.8521 | 4.30E-03 | 0.0412 | 0.0104 | 1.0087 | 0.0075 | -0.0036  | 0.0049 |
| Age when periods started (menarche)                                                    | European  | -0.1063 | 0.0378 | -2.8141 | 4.90E-03 | 0.2074 | 0.0103 | 1.0099 | 0.0132 | -0.0035  | 0.0059 |
| Diagnoses - main ICD10: N81 Female genital prolapse                                    | European  | 0.2910  | 0.1043 | 2.7900  | 5.30E-03 | 0.0067 | 0.0015 | 1.0274 | 0.0068 | -0.0008  | 0.0053 |
| Ever stopped smoking for 6+ months                                                     | European  | 0.3511  | 0.1266 | 2.7730  | 5.60E-03 | 0.0193 | 0.0060 | 1.0014 | 0.0074 | 0.0065   | 0.0046 |
| Diagnoses - main ICD10: K22 Other diseases of oesophagus                               | European  | 0.4443  | 0.1604 | 2.7691  | 5.60E-03 | 0.0041 | 0.0017 | 1.0047 | 0.0075 | -0.0012  | 0.0058 |
| Illnesses of father: None of the above (group 2)                                       | European  | -0.2678 | 0.0969 | -2.7637 | 5.70E-03 | 0.0094 | 0.0017 | 1.0016 | 0.0075 | -0.0011  | 0.0051 |
| Diagnoses - main ICD10: I84 Haemorrhoids                                               | European  | 0.2452  | 0.0888 | 2.7623  | 5.70E-03 | 0.0097 | 0.0017 | 1.0001 | 0.0073 | 0.0004   | 0.0047 |
| Fractured bone site(s): Other bones                                                    | European  | 0.2729  | 0.1006 | 2.7141  | 6.60E-03 | 0.0084 | 0.0016 | 1.0049 | 0.0069 | 0.0060   | 0.0049 |
| Nap during day                                                                         | European  | 0.1164  | 0.0432 | 2.6949  | 7.00E-03 | 0.0806 | 0.0036 | 1.0246 | 0.0105 | 0.0132   | 0.0064 |
| Diagnoses - main ICD10: I25 Chronic ischaemic heart disease                            | European  | 0.1776  | 0.0660 | 2.6910  | 7.10E-03 | 0.0202 | 0.0023 | 1.0189 | 0.0084 | 0.0081   | 0.0054 |
| Medication for cholesterol blood pressure or diabetes: None of the above               | European  | -0.1474 | 0.0551 | -2.6756 | 7.50E-03 | 0.0874 | 0.0052 | 1.0370 | 0.0109 | -0.0063  | 0.0061 |
| Diagnoses - main ICD10: M23 Internal derangement of knee                               | European  | 0.2550  | 0.0954 | 2.6720  | 7.50E-03 | 0.0082 | 0.0020 | 1.0040 | 0.0081 | 0.0015   | 0.0055 |
| Number of self-reported cancers                                                        | European  | 0.2808  | 0.1056 | 2.6602  | 7.80E-03 | 0.0068 | 0.0016 | 1.0112 | 0.0069 | -0.0069  | 0.0052 |
| Diagnoses - main ICD10: K30 Dyspepsia                                                  | European  | 0.4908  | 0.1851 | 2.6524  | 8.00E-03 | 0.0029 | 0.0014 | 1.0060 | 0.0068 | -0.0027  | 0.0054 |
| Pulse rate automated reading                                                           | European  | 0.0958  | 0.0362 | 2.6447  | 8.20E-03 | 0.1537 | 0.0122 | 1.0499 | 0.0326 | 0.0098   | 0.0070 |

| Trait                                                                                                                        | ethnicity | rg      | SE     | z       | p        | h2_obs | se     | h2_int | se     | gcov_int | se     |
|------------------------------------------------------------------------------------------------------------------------------|-----------|---------|--------|---------|----------|--------|--------|--------|--------|----------|--------|
| Number of trend entries                                                                                                      | European  | -0.3420 | 0.1300 | -2.6311 | 8.50E-03 | 0.0301 | 0.0101 | 1.0071 | 0.0074 | -0.0031  | 0.0048 |
| Duration of moderate activity                                                                                                | European  | 0.1784  | 0.0683 | 2.6108  | 9.00E-03 | 0.0314 | 0.0024 | 1.0119 | 0.0084 | 0.0047   | 0.0052 |
| Vitamin and mineral supplements: Vitamin B                                                                                   | European  | 0.3051  | 0.1193 | 2.5588  | 1.05E-02 | 0.0070 | 0.0016 | 1.0034 | 0.0072 | 0.0000   | 0.0053 |
| Cancer diagnosed by doctor                                                                                                   | European  | 0.2773  | 0.1088 | 2.5479  | 1.08E-02 | 0.0071 | 0.0016 | 1.0068 | 0.0068 | -0.0094  | 0.0052 |
| Duration of vigorous activity                                                                                                | European  | 0.1927  | 0.0760 | 2.5367  | 1.12E-02 | 0.0363 | 0.0033 | 0.9909 | 0.0076 | 0.0075   | 0.0058 |
| Non-cancer illness code self-reported: rheumatoid arthritis                                                                  | European  | 0.3679  | 0.1463 | 2.5136  | 1.20E-02 | 0.0045 | 0.0014 | 1.0063 | 0.0068 | -0.0079  | 0.0054 |
| Blood clot DVT bronchitis emphysema asthma rhinitis eczema allergy diagnosed by doctor: Hayfever allergic rhinitis or eczema | European  | -0.0985 | 0.0397 | -2.4813 | 1.31E-02 | 0.0731 | 0.0060 | 1.0400 | 0.0173 | 0.0094   | 0.0056 |
| Home area population density - urban or rural: Scotland - Large Urban Area                                                   | European  | -0.3103 | 0.1258 | -2.4674 | 1.36E-02 | 0.0116 | 0.0031 | 2.1328 | 0.0150 | -0.0111  | 0.0072 |
| Non-cancer illness code self-reported: hypothyroidism/myxoedema                                                              | European  | 0.1592  | 0.0663 | 2.4017  | 1.63E-02 | 0.0510 | 0.0060 | 1.0322 | 0.0165 | -0.0005  | 0.0063 |
| Diagnoses - main ICD10: S09 Other and unspecified injuries of head                                                           | European  | 0.3013  | 0.1294 | 2.3279  | 1.99E-02 | 0.0042 | 0.0015 | 0.9924 | 0.0068 | -0.0042  | 0.0050 |
| Mineral and other dietary supplements: Glucosamine                                                                           | European  | -0.1493 | 0.0643 | -2.3202 | 2.03E-02 | 0.0244 | 0.0020 | 1.0085 | 0.0075 | 0.0009   | 0.0056 |
| Diagnoses - main ICD10: K60 Fissure and fistula of anal and rectal regions                                                   | European  | 0.2507  | 0.1108 | 2.2620  | 2.37E-02 | 0.0053 | 0.0014 | 0.9838 | 0.0065 | -0.0020  | 0.0050 |
| Mineral and other dietary supplements: Selenium                                                                              | European  | 0.2579  | 0.1159 | 2.2244  | 2.61E-02 | 0.0065 | 0.0015 | 0.9992 | 0.0075 | -0.0040  | 0.0054 |
| Diagnoses - main ICD10: K43 Ventral hernia                                                                                   | European  | 0.2620  | 0.1181 | 2.2176  | 2.66E-02 | 0.0054 | 0.0014 | 0.9927 | 0.0072 | -0.0006  | 0.0049 |
| Non-cancer illness code self-reported: kidney stone/ureter stone/bladder stone                                               | European  | 0.2403  | 0.1084 | 2.2163  | 2.67E-02 | 0.0090 | 0.0017 | 1.0032 | 0.0080 | -0.0082  | 0.0053 |
| Diagnoses - main ICD10: R04 Haemorrhage from respiratory passages                                                            | European  | 0.4456  | 0.2011 | 2.2155  | 2.67E-02 | 0.0027 | 0.0015 | 0.9966 | 0.0070 | 0.0001   | 0.0053 |
| Tinnitus: Yes now some of the time                                                                                           | European  | 0.4031  | 0.1838 | 2.1929  | 2.83E-02 | 0.0075 | 0.0040 | 1.0020 | 0.0062 | -0.0075  | 0.0050 |
| Diagnoses - main ICD10: N20 Calculus of kidney and ureter                                                                    | European  | 0.2384  | 0.1088 | 2.1900  | 2.85E-02 | 0.0077 | 0.0015 | 1.0108 | 0.0071 | 0.0017   | 0.0052 |
| Diagnoses - main ICD10: M67 Other disorders of synovium and tendon                                                           | European  | 0.5843  | 0.2676 | 2.1837  | 2.90E-02 | 0.0020 | 0.0014 | 1.0004 | 0.0069 | -0.0015  | 0.0048 |
| Non-cancer illness code self-reported: muscle or soft tissue injuries                                                        | European  | 0.4187  | 0.1925 | 2.1749  | 2.96E-02 | 0.0030 | 0.0015 | 0.9956 | 0.0076 | -0.0059  | 0.0055 |
| Number of depression episodes                                                                                                | European  | 0.3908  | 0.1798 | 2.1738  | 2.97E-02 | 0.0319 | 0.0122 | 1.0051 | 0.0063 | 0.0022   | 0.0060 |
| Diagnoses - main ICD10: J34 Other disorders of nose and nasal sinuses                                                        | European  | 0.4655  | 0.2149 | 2.1664  | 3.03E-02 | 0.0025 | 0.0014 | 1.0069 | 0.0070 | 0.0009   | 0.0049 |
| Ever had prostate specific antigen (PSA) test                                                                                | European  | -0.1709 | 0.0792 | -2.1578 | 3.09E-02 | 0.0346 | 0.0035 | 1.0020 | 0.0076 | 0.0023   | 0.0054 |
| Diagnoses - main ICD10: R69 Unknown and unspecified causes of morbidity                                                      | European  | 0.2860  | 0.1332 | 2.1469  | 3.18E-02 | 0.0053 | 0.0013 | 0.9981 | 0.0069 | 0.0099   | 0.0054 |
| Friendships satisfaction                                                                                                     | European  | 0.1401  | 0.0656 | 2.1355  | 3.27E-02 | 0.0614 | 0.0053 | 0.9999 | 0.0077 | -0.0025  | 0.0050 |
| Diagnoses - main ICD10: H26 Other cataract                                                                                   | European  | 0.1980  | 0.0932 | 2.1247  | 3.36E-02 | 0.0096 | 0.0016 | 0.9919 | 0.0074 | -0.0046  | 0.0056 |
| Diagnoses - main ICD10: M24 Other specific joint derangements                                                                | European  | 0.3503  | 0.1650 | 2.1226  | 3.38E-02 | 0.0039 | 0.0014 | 0.9854 | 0.0070 | -0.0079  | 0.0055 |
| No-wear time bias adjusted acceleration standard deviation                                                                   | European  | -0.1402 | 0.0664 | -2.1102 | 3.48E-02 | 0.0872 | 0.0082 | 1.0046 | 0.0078 | -0.0079  | 0.0049 |
| Diagnoses - main ICD10: K20 Oesophagitis                                                                                     | European  | 0.6014  | 0.2849 | 2.1112  | 3.48E-02 | 0.0018 | 0.0013 | 1.0094 | 0.0067 | 0.0041   | 0.0046 |
| Illnesses of mother: None of the above (group 2)                                                                             | European  | -0.2137 | 0.1017 | -2.1010 | 3.56E-02 | 0.0093 | 0.0017 | 1.0009 | 0.0069 | -0.0096  | 0.0050 |
| Reason for glasses/contact lenses: For astigmatism                                                                           | European  | -0.1891 | 0.0900 | -2.1002 | 3.57E-02 | 0.0090 | 0.0016 | 1.0262 | 0.0071 | 0.0019   | 0.0049 |



| Trait                                                                     | ethnicity | rg      | SE     | z       | p        | h2_obs | se     | h2_int | se     | gcov_int | se     |
|---------------------------------------------------------------------------|-----------|---------|--------|---------|----------|--------|--------|--------|--------|----------|--------|
| Diagnoses - main ICD10: N32 Other disorders of bladder                    | European  | 0.2891  | 0.1381 | 2.0926  | 3.64E-02 | 0.0039 | 0.0012 | 0.9900 | 0.0060 | -0.0055  | 0.0048 |
| Diagnoses - main ICD10: J22 Unspecified acute lower respiratory infection | European  | 0.3684  | 0.1761 | 2.0913  | 3.65E-02 | 0.0031 | 0.0015 | 0.9965 | 0.0075 | 0.0057   | 0.0051 |
| Pulse wave peak to peak time                                              | European  | -0.1686 | 0.0810 | -2.0831 | 3.72E-02 | 0.0390 | 0.0049 | 1.0113 | 0.0073 | -0.0049  | 0.0054 |
| Why stopped smoking: Health precaution                                    | European  | -0.1522 | 0.0739 | -2.0597 | 3.94E-02 | 0.0536 | 0.0068 | 1.0008 | 0.0074 | 0.0005   | 0.0051 |
| Diagnoses - main ICD10: R31 Unspecified haematuria                        | European  | 0.3665  | 0.1781 | 2.0582  | 3.96E-02 | 0.0028 | 0.0016 | 1.0110 | 0.0070 | 0.0014   | 0.0050 |
| Non-cancer illness code self-reported: migraine                           | European  | 0.1508  | 0.0734 | 2.0538  | 4.00E-02 | 0.0160 | 0.0019 | 1.0166 | 0.0083 | 0.0021   | 0.0050 |
| Diagnoses - main ICD10: I21 Acute myocardial infarction                   | European  | 0.1896  | 0.0935 | 2.0286  | 4.25E-02 | 0.0102 | 0.0016 | 1.0065 | 0.0077 | 0.0039   | 0.0048 |
| Diagnoses - main ICD10: M20 Acquired deformities of fingers and toes      | European  | 0.1694  | 0.0839 | 2.0179  | 4.36E-02 | 0.0095 | 0.0016 | 1.0005 | 0.0069 | 0.0064   | 0.0051 |
| Diagnoses - main ICD10: R35 Polyuria                                      | European  | 0.4320  | 0.2149 | 2.0102  | 4.44E-02 | 0.0030 | 0.0015 | 0.9976 | 0.0071 | -0.0032  | 0.0053 |
| Creatinine (enzymatic) in urine                                           | European  | 0.0899  | 0.0452 | 1.9895  | 4.66E-02 | 0.0657 | 0.0031 | 1.0206 | 0.0096 | 0.0020   | 0.0056 |
| Mineral and other dietary supplements: Zinc                               | European  | 0.1609  | 0.0811 | 1.9847  | 4.72E-02 | 0.0109 | 0.0015 | 0.9900 | 0.0063 | 0.0046   | 0.0049 |
| Diagnoses - main ICD10: K80 Cholelithiasis                                | European  | 0.1971  | 0.0996 | 1.9785  | 4.79E-02 | 0.0096 | 0.0018 | 1.0233 | 0.0090 | 0.0057   | 0.0057 |
| Illnesses of father: High blood pressure                                  | European  | 0.1333  | 0.0677 | 1.9695  | 4.89E-02 | 0.0192 | 0.0019 | 1.0147 | 0.0074 | -0.0038  | 0.0054 |
| Maximum heart rate during fitness test                                    | European  | -0.2256 | 0.1151 | -1.9591 | 5.01E-02 | 0.0694 | 0.0130 | 1.0153 | 0.0086 | 0.0094   | 0.0063 |
| Sleep duration                                                            | European  | -0.1101 | 0.0565 | -1.9479 | 5.14E-02 | 0.0704 | 0.0035 | 1.0293 | 0.0106 | -0.0195  | 0.0066 |
| Impedance of leg (left)                                                   | European  | -0.0731 | 0.0375 | -1.9468 | 5.16E-02 | 0.2431 | 0.0103 | 1.0739 | 0.0233 | 0.0056   | 0.0079 |
| Illnesses of mother: None of the above (group 1)                          | European  | -0.1433 | 0.0739 | -1.9404 | 5.23E-02 | 0.0166 | 0.0018 | 1.0145 | 0.0075 | -0.0033  | 0.0055 |
| Diagnoses - main ICD10: G47 Sleep disorders                               | European  | 0.2185  | 0.1136 | 1.9234  | 5.44E-02 | 0.0064 | 0.0014 | 0.9931 | 0.0069 | -0.0018  | 0.0056 |
| Diastolic blood pressure automated reading                                | European  | 0.0790  | 0.0416 | 1.9006  | 5.74E-02 | 0.1354 | 0.0061 | 1.0697 | 0.0170 | 0.0000   | 0.0071 |
| Number of pregnancy terminations                                          | European  | 0.1791  | 0.0948 | 1.8898  | 5.88E-02 | 0.0606 | 0.0103 | 1.0071 | 0.0076 | 0.0036   | 0.0051 |
| Arm fat-free mass (left)                                                  | European  | 0.0627  | 0.0333 | 1.8830  | 5.97E-02 | 0.2657 | 0.0115 | 1.1091 | 0.0284 | 0.0096   | 0.0068 |
| Time spent driving                                                        | European  | -0.1187 | 0.0633 | -1.8752 | 6.08E-02 | 0.0420 | 0.0030 | 1.0033 | 0.0075 | -0.0028  | 0.0056 |
| Mean time to correctly identify matches                                   | European  | 0.0808  | 0.0432 | 1.8718  | 6.12E-02 | 0.0721 | 0.0029 | 1.0379 | 0.0096 | -0.0070  | 0.0055 |
| Current employment status: Retired                                        | European  | -0.1858 | 0.0995 | -1.8663 | 6.20E-02 | 0.0084 | 0.0015 | 1.0163 | 0.0070 | -0.0042  | 0.0053 |
| Diagnoses - main ICD10: I10 Essential (primary) hypertension              | European  | 0.4054  | 0.2174 | 1.8650  | 6.22E-02 | 0.0023 | 0.0013 | 0.9992 | 0.0059 | -0.0063  | 0.0054 |
| Number of days/week of moderate physical activity 10+ minutes             | European  | 0.1241  | 0.0669 | 1.8556  | 6.35E-02 | 0.0420 | 0.0024 | 1.0126 | 0.0077 | 0.0003   | 0.0061 |
| Impedance of leg (right)                                                  | European  | -0.0688 | 0.0372 | -1.8505 | 6.42E-02 | 0.2422 | 0.0103 | 1.0836 | 0.0234 | 0.0046   | 0.0076 |
| Non-cancer illness code self-reported: cholelithiasis/gall stones         | European  | 0.1809  | 0.0982 | 1.8413  | 6.56E-02 | 0.0087 | 0.0018 | 1.0186 | 0.0085 | -0.0018  | 0.0051 |
| Relative age voice broke                                                  | European  | -0.1017 | 0.0559 | -1.8200 | 6.88E-02 | 0.0725 | 0.0055 | 1.0102 | 0.0088 | -0.0049  | 0.0054 |
| Vitamin and mineral supplements: Vitamin C                                | European  | 0.1552  | 0.0859 | 1.8060  | 7.09E-02 | 0.0133 | 0.0016 | 0.9975 | 0.0072 | -0.0083  | 0.0055 |
| Frequency of heavy DIY in last 4 weeks                                    | European  | 0.1957  | 0.1088 | 1.7982  | 7.21E-02 | 0.0201 | 0.0037 | 1.0100 | 0.0067 | 0.0029   | 0.0057 |
| Arm predicted mass (left)                                                 | European  | 0.0600  | 0.0334 | 1.7952  | 7.26E-02 | 0.2648 | 0.0116 | 1.1112 | 0.0287 | 0.0105   | 0.0068 |
| Diagnoses - main ICD10: L03 Cellulitis                                    | European  | 0.2505  | 0.1408 | 1.7794  | 7.52E-02 | 0.0041 | 0.0015 | 1.0016 | 0.0069 | -0.0050  | 0.0050 |

| Trait                                                                                                           | ethnicity | rg      | SE     | z       | p        | h2_obs | se     | h2_int | se     | gcov_int | se     |
|-----------------------------------------------------------------------------------------------------------------|-----------|---------|--------|---------|----------|--------|--------|--------|--------|----------|--------|
| Medication for cholesterol blood pressure or diabetes: Blood pressure medication                                | European  | 0.0992  | 0.0570 | 1.7406  | 8.18E-02 | 0.1045 | 0.0058 | 1.0325 | 0.0105 | 0.0048   | 0.0064 |
| Illnesses of mother: High blood pressure                                                                        | European  | 0.1028  | 0.0598 | 1.7195  | 8.55E-02 | 0.0289 | 0.0022 | 1.0210 | 0.0089 | 0.0018   | 0.0060 |
| Diagnoses - main ICD10: Z47 Other orthopaedic follow-up care                                                    | European  | 0.2602  | 0.1519 | 1.7125  | 8.68E-02 | 0.0032 | 0.0013 | 0.9996 | 0.0069 | 0.0026   | 0.0047 |
| Fractured bone site(s): Arm                                                                                     | European  | -0.2328 | 0.1371 | -1.6989 | 8.93E-02 | 0.0053 | 0.0015 | 0.9969 | 0.0075 | 0.0087   | 0.0052 |
| Comparative body size at age 10                                                                                 | European  | 0.0618  | 0.0366 | 1.6908  | 9.09E-02 | 0.1457 | 0.0097 | 1.0172 | 0.0199 | -0.0156  | 0.0059 |
| Diagnoses - main ICD10: Z09 Follow-up examination after treatment for conditions other than malignant neoplasms | European  | 0.2839  | 0.1681 | 1.6890  | 9.12E-02 | 0.0027 | 0.0013 | 1.0028 | 0.0066 | 0.0045   | 0.0049 |
| Birth weight of first child                                                                                     | European  | -0.0824 | 0.0489 | -1.6865 | 9.17E-02 | 0.1100 | 0.0070 | 1.0201 | 0.0099 | 0.0007   | 0.0056 |
| Illnesses of father: Diabetes                                                                                   | European  | 0.1379  | 0.0820 | 1.6828  | 9.24E-02 | 0.0181 | 0.0024 | 1.0290 | 0.0079 | 0.0050   | 0.0056 |
| Cough on most days                                                                                              | European  | 0.1505  | 0.0899 | 1.6739  | 9.42E-02 | 0.0486 | 0.0065 | 0.9977 | 0.0078 | 0.0065   | 0.0052 |
| Diagnoses - main ICD10: E04 Other non-toxic goitre                                                              | European  | 0.1894  | 0.1144 | 1.6554  | 9.79E-02 | 0.0049 | 0.0014 | 0.9947 | 0.0070 | -0.0091  | 0.0048 |
| Illnesses of mother: Alzheimer's disease/dementia                                                               | European  | -0.2867 | 0.1754 | -1.6343 | 1.02E-01 | 0.0037 | 0.0048 | 1.0364 | 0.0361 | -0.0060  | 0.0055 |
| Diagnoses - main ICD10: H25 Senile cataract                                                                     | European  | 0.2685  | 0.1651 | 1.6266  | 1.04E-01 | 0.0029 | 0.0014 | 1.0162 | 0.0071 | -0.0057  | 0.0051 |
| Non-cancer illness code self-reported: bladder problem (not cancer)                                             | European  | 0.2977  | 0.1849 | 1.6102  | 1.07E-01 | 0.0022 | 0.0013 | 1.0023 | 0.0070 | -0.0028  | 0.0051 |
| Frequency of other exercises in last 4 weeks                                                                    | European  | 0.1411  | 0.0880 | 1.6028  | 1.09E-01 | 0.0210 | 0.0033 | 0.9987 | 0.0067 | -0.0036  | 0.0052 |
| Hair/balding pattern: Pattern 3                                                                                 | European  | -0.0853 | 0.0534 | -1.5963 | 1.10E-01 | 0.0569 | 0.0144 | 1.0174 | 0.0205 | -0.0021  | 0.0054 |
| Eye problems/disorders: Diabetes related eye disease                                                            | European  | 0.1809  | 0.1135 | 1.5946  | 1.11E-01 | 0.0196 | 0.0044 | 1.0078 | 0.0062 | 0.0104   | 0.0049 |
| Non-cancer illness code self-reported: polio / poliomyelitis                                                    | European  | 0.2821  | 0.1771 | 1.5927  | 1.11E-01 | 0.0025 | 0.0013 | 0.9934 | 0.0067 | -0.0149  | 0.0047 |
| Non-cancer illness code self-reported: type 2 diabetes                                                          | European  | 0.1878  | 0.1180 | 1.5917  | 1.11E-01 | 0.0063 | 0.0014 | 1.0116 | 0.0069 | 0.0034   | 0.0051 |
| Blood clot DVT bronchitis emphysema asthma rhinitis eczema allergy diagnosed by doctor: None of the above       | European  | -0.0653 | 0.0412 | -1.5866 | 1.13E-01 | 0.0767 | 0.0070 | 1.0380 | 0.0186 | -0.0077  | 0.0060 |
| Home area population density - urban or rural: England/Wales - Village - less sparse                            | European  | -0.3472 | 0.2219 | -1.5648 | 1.18E-01 | 0.0020 | 0.0013 | 1.0250 | 0.0064 | -0.0083  | 0.0052 |
| Diagnoses - main ICD10: S66 Injury of muscle and tendon at wrist and hand level                                 | European  | 0.4379  | 0.2819 | 1.5532  | 1.20E-01 | 0.0016 | 0.0012 | 1.0049 | 0.0072 | -0.0046  | 0.0050 |
| Diagnoses - main ICD10: C44 Other malignant neoplasms of skin                                                   | European  | 0.1239  | 0.0799 | 1.5500  | 1.21E-01 | 0.0105 | 0.0023 | 1.0054 | 0.0089 | -0.0069  | 0.0049 |
| Arm fat-free mass (right)                                                                                       | European  | 0.0509  | 0.0333 | 1.5278  | 1.27E-01 | 0.2671 | 0.0117 | 1.1008 | 0.0288 | 0.0053   | 0.0068 |
| Illnesses of father: Heart disease                                                                              | European  | 0.0893  | 0.0588 | 1.5173  | 1.29E-01 | 0.0299 | 0.0026 | 1.0043 | 0.0088 | 0.0032   | 0.0051 |
| Number of older siblings                                                                                        | European  | 0.5052  | 0.3339 | 1.5132  | 1.30E-01 | 0.0056 | 0.0053 | 1.0076 | 0.0064 | 0.0053   | 0.0046 |
| Non-cancer illness code self-reported: psoriasis                                                                | European  | 0.1824  | 0.1209 | 1.5091  | 1.31E-01 | 0.0072 | 0.0016 | 1.0178 | 0.0085 | 0.0025   | 0.0055 |
| Reason for glasses/contact lenses: For just reading/near work as you are getting older (called presbyopia)      | European  | -0.2391 | 0.1605 | -1.4901 | 1.36E-01 | 0.0039 | 0.0016 | 1.1363 | 0.0085 | -0.0013  | 0.0056 |
| Target heart rate achieved                                                                                      | European  | -0.1813 | 0.1220 | -1.4865 | 1.37E-01 | 0.0340 | 0.0109 | 1.0067 | 0.0072 | 0.0024   | 0.0053 |
| Used an inhaler for chest within last hour                                                                      | European  | 0.1991  | 0.1357 | 1.4677  | 1.42E-01 | 0.0044 | 0.0015 | 1.0017 | 0.0064 | 0.0034   | 0.0052 |
| Diagnoses - main ICD10: M10 Gout                                                                                | European  | 0.3139  | 0.2153 | 1.4579  | 1.45E-01 | 0.0023 | 0.0015 | 0.9998 | 0.0072 | -0.0042  | 0.0055 |

| Trait                                                                                                    | ethnicity | rg      | SE     | z       | p        | h2_obs | se     | h2_int | se     | gcov_int | se     |
|----------------------------------------------------------------------------------------------------------|-----------|---------|--------|---------|----------|--------|--------|--------|--------|----------|--------|
| Non-cancer illness code self-reported: pneumothorax                                                      | European  | -0.2214 | 0.1520 | -1.4567 | 1.45E-01 | 0.0030 | 0.0015 | 0.9873 | 0.0070 | 0.0009   | 0.0053 |
| Cancer code self-reported: breast cancer                                                                 | European  | 0.1374  | 0.0953 | 1.4418  | 1.49E-01 | 0.0098 | 0.0018 | 1.0195 | 0.0085 | -0.0081  | 0.0056 |
| Pulse rate                                                                                               | European  | 0.0763  | 0.0530 | 1.4388  | 1.50E-01 | 0.1349 | 0.0140 | 1.0262 | 0.0155 | 0.0130   | 0.0060 |
| Non-cancer illness code self-reported: sleep apnoea                                                      | European  | 0.2504  | 0.1751 | 1.4302  | 1.53E-01 | 0.0027 | 0.0014 | 1.0083 | 0.0069 | 0.0014   | 0.0053 |
| Arm predicted mass (right)                                                                               | European  | 0.0476  | 0.0334 | 1.4252  | 1.54E-01 | 0.2655 | 0.0117 | 1.1040 | 0.0290 | 0.0072   | 0.0068 |
| Basal metabolic rate                                                                                     | European  | 0.0474  | 0.0335 | 1.4140  | 1.57E-01 | 0.2851 | 0.0125 | 1.1151 | 0.0295 | 0.0088   | 0.0069 |
| Frequency of light DIY in last 4 weeks                                                                   | European  | 0.1140  | 0.0807 | 1.4124  | 1.58E-01 | 0.0229 | 0.0030 | 1.0019 | 0.0069 | -0.0008  | 0.0052 |
| Fractured bone site(s): Ankle                                                                            | European  | 0.1436  | 0.1023 | 1.4037  | 1.60E-01 | 0.0063 | 0.0015 | 0.9966 | 0.0066 | 0.0062   | 0.0049 |
| Fractured bone site(s): Wrist                                                                            | European  | 0.1753  | 0.1251 | 1.4011  | 1.61E-01 | 0.0068 | 0.0017 | 1.0065 | 0.0075 | -0.0065  | 0.0054 |
| Leg predicted mass (left)                                                                                | European  | 0.0488  | 0.0349 | 1.4007  | 1.61E-01 | 0.2667 | 0.0116 | 1.1052 | 0.0267 | 0.0056   | 0.0069 |
| Headaches for 3+ months                                                                                  | European  | 0.1181  | 0.0845 | 1.3973  | 1.62E-01 | 0.0552 | 0.0072 | 1.0078 | 0.0067 | -0.0005  | 0.0049 |
| Leg fat-free mass (left)                                                                                 | European  | 0.0485  | 0.0349 | 1.3892  | 1.65E-01 | 0.2671 | 0.0117 | 1.1052 | 0.0269 | 0.0059   | 0.0069 |
| Transport type for commuting to job workplace: Walk                                                      | European  | -0.1342 | 0.0985 | -1.3626 | 1.73E-01 | 0.0172 | 0.0028 | 1.0016 | 0.0071 | 0.0002   | 0.0052 |
| Mineral and other dietary supplements: Fish oil (including cod liver oil)                                | European  | -0.0950 | 0.0708 | -1.3420 | 1.80E-01 | 0.0265 | 0.0020 | 1.0085 | 0.0077 | 0.0048   | 0.0055 |
| Diagnoses - main ICD10: M72 Fibroblastic disorders                                                       | European  | 0.1238  | 0.0925 | 1.3384  | 1.81E-01 | 0.0103 | 0.0031 | 1.0189 | 0.0219 | -0.0079  | 0.0051 |
| Number of children fathered                                                                              | European  | 0.1026  | 0.0768 | 1.3351  | 1.82E-01 | 0.0323 | 0.0036 | 1.0107 | 0.0073 | -0.0032  | 0.0050 |
| Reason for reducing amount of alcohol drunk: Health precaution                                           | European  | -0.0888 | 0.0667 | -1.3302 | 1.83E-01 | 0.0462 | 0.0047 | 0.9968 | 0.0070 | 0.0073   | 0.0050 |
| Length of working week for main job                                                                      | European  | 0.1177  | 0.0888 | 1.3254  | 1.85E-01 | 0.0187 | 0.0029 | 1.0117 | 0.0068 | 0.0025   | 0.0053 |
| Non-cancer illness code self-reported: nasal polyps                                                      | European  | -0.1542 | 0.1167 | -1.3211 | 1.87E-01 | 0.0050 | 0.0016 | 1.0072 | 0.0069 | 0.0013   | 0.0050 |
| Type of tobacco previously smoked: Cigars or pipes                                                       | European  | -0.1916 | 0.1515 | -1.2649 | 2.06E-01 | 0.0115 | 0.0053 | 1.0013 | 0.0064 | -0.0064  | 0.0049 |
| Mouth/teeth dental problems: Mouth ulcers                                                                | European  | 0.0762  | 0.0617 | 1.2344  | 2.17E-01 | 0.0289 | 0.0038 | 1.0329 | 0.0116 | -0.0038  | 0.0051 |
| Hair/balding pattern: Pattern 4                                                                          | European  | -0.0458 | 0.0376 | -1.2154 | 2.24E-01 | 0.1676 | 0.0203 | 1.0991 | 0.0277 | -0.0003  | 0.0054 |
| Diagnoses - main ICD10: M25 Other joint disorders not elsewhere classified                               | European  | 0.6984  | 0.5789 | 1.2063  | 2.28E-01 | 0.0010 | 0.0014 | 1.0157 | 0.0070 | 0.0034   | 0.0049 |
| Length of menstrual cycle                                                                                | European  | 0.1149  | 0.0966 | 1.1901  | 2.34E-01 | 0.0985 | 0.0204 | 1.0020 | 0.0071 | -0.0013  | 0.0050 |
| Diagnoses - main ICD10: R11 Nausea and vomiting                                                          | European  | 0.4065  | 0.3509 | 1.1584  | 2.47E-01 | 0.0012 | 0.0013 | 0.9948 | 0.0067 | 0.0054   | 0.0052 |
| Average weekly intake of other alcoholic drinks                                                          | European  | 0.2344  | 0.2036 | 1.1508  | 2.50E-01 | 0.0077 | 0.0062 | 1.0041 | 0.0066 | -0.0014  | 0.0044 |
| Mineral and other dietary supplements: None of the above                                                 | European  | 0.0742  | 0.0647 | 1.1471  | 2.51E-01 | 0.0293 | 0.0021 | 1.0143 | 0.0077 | -0.0023  | 0.0057 |
| Started insulin within one year diagnosis of diabetes                                                    | European  | -0.1375 | 0.1207 | -1.1394 | 2.55E-01 | 0.1695 | 0.0493 | 1.0051 | 0.0086 | 0.0065   | 0.0057 |
| Diagnoses - main ICD10: T84 Complications of internal orthopaedic prosthetic devices implants and grafts | European  | 0.1681  | 0.1478 | 1.1370  | 2.56E-01 | 0.0049 | 0.0017 | 0.9925 | 0.0075 | 0.0076   | 0.0055 |
| Heel bone mineral density (BMD) T-score automated                                                        | European  | 0.0494  | 0.0445 | 1.1104  | 2.67E-01 | 0.2945 | 0.0335 | 1.0849 | 0.0378 | -0.0103  | 0.0078 |
| Non-cancer illness code self-reported: retinal detachment                                                | European  | -0.2128 | 0.1934 | -1.1003 | 2.71E-01 | 0.0031 | 0.0014 | 1.0057 | 0.0067 | 0.0011   | 0.0059 |
| Diagnoses - main ICD10: D25 Leiomyoma of uterus                                                          | European  | 0.1289  | 0.1213 | 1.0632  | 2.88E-01 | 0.0058 | 0.0014 | 0.9940 | 0.0065 | 0.0011   | 0.0053 |

| Trait                                                                                                                                                  | ethnicity | rg      | SE     | z       | p        | h2_obs | se     | h2_int | se     | gcov_int | se     |
|--------------------------------------------------------------------------------------------------------------------------------------------------------|-----------|---------|--------|---------|----------|--------|--------|--------|--------|----------|--------|
| Non-cancer illness code self-reported: ulcerative colitis                                                                                              | European  | -0.1207 | 0.1153 | -1.0470 | 2.95E-01 | 0.0058 | 0.0017 | 1.0116 | 0.0080 | 0.0080   | 0.0047 |
| Reason for glasses/contact lenses: For long-sightedness i.e. for distance and near but particularly for near tasks like reading (called hypermetropia) | European  | 0.0977  | 0.0956 | 1.0222  | 3.07E-01 | 0.0095 | 0.0015 | 1.0666 | 0.0074 | 0.0039   | 0.0052 |
| Hearing aid user                                                                                                                                       | European  | 0.0888  | 0.0872 | 1.0179  | 3.09E-01 | 0.0177 | 0.0027 | 1.0018 | 0.0065 | 0.0020   | 0.0050 |
| Pulse wave Arterial Stiffness index                                                                                                                    | European  | 0.0838  | 0.0830 | 1.0103  | 3.12E-01 | 0.0380 | 0.0051 | 1.0100 | 0.0073 | 0.0068   | 0.0053 |
| Doctor diagnosed asthma                                                                                                                                | European  | 0.0673  | 0.0669 | 1.0067  | 3.14E-01 | 0.0713 | 0.0100 | 0.9960 | 0.0085 | 0.0047   | 0.0051 |
| Transport type for commuting to job workplace: Car/motor vehicle                                                                                       | European  | 0.0752  | 0.0753 | 0.9992  | 3.18E-01 | 0.0251 | 0.0030 | 1.0219 | 0.0070 | 0.0049   | 0.0049 |
| Diagnoses - main ICD10: R14 Flatulence and related conditions                                                                                          | European  | 0.1457  | 0.1460 | 0.9979  | 3.18E-01 | 0.0036 | 0.0012 | 0.9896 | 0.0068 | -0.0002  | 0.0051 |
| Cancer code self-reported: squamous cell carcinoma                                                                                                     | European  | 0.1869  | 0.1905 | 0.9811  | 3.27E-01 | 0.0022 | 0.0013 | 0.9993 | 0.0068 | -0.0073  | 0.0049 |
| Diagnoses - main ICD10: C50 Malignant neoplasm of breast                                                                                               | European  | 0.0931  | 0.0972 | 0.9577  | 3.38E-01 | 0.0085 | 0.0016 | 1.0061 | 0.0080 | -0.0068  | 0.0050 |
| Relative age of first facial hair                                                                                                                      | European  | -0.0449 | 0.0471 | -0.9519 | 3.41E-01 | 0.1255 | 0.0074 | 1.0408 | 0.0120 | -0.0090  | 0.0056 |
| Vitamin and mineral supplements: Vitamin A                                                                                                             | European  | 0.1433  | 0.1512 | 0.9482  | 3.43E-01 | 0.0040 | 0.0015 | 1.0014 | 0.0068 | 0.0000   | 0.0057 |
| Diagnoses - main ICD10: Z80 Family history of malignant neoplasm                                                                                       | European  | 0.2581  | 0.2723 | 0.9480  | 3.43E-01 | 0.0014 | 0.0014 | 0.9900 | 0.0062 | -0.0083  | 0.0055 |
| Leg fat-free mass (right)                                                                                                                              | European  | 0.0329  | 0.0348 | 0.9449  | 3.45E-01 | 0.2651 | 0.0117 | 1.1109 | 0.0275 | 0.0058   | 0.0067 |
| Non-cancer illness code self-reported: allergy or anaphylactic reaction to drug                                                                        | European  | 0.4754  | 0.5065 | 0.9387  | 3.48E-01 | 0.0009 | 0.0013 | 1.0091 | 0.0065 | -0.0058  | 0.0049 |
| Non-cancer illness code self-reported: gout                                                                                                            | European  | 0.0574  | 0.0616 | 0.9317  | 3.52E-01 | 0.0249 | 0.0069 | 0.9919 | 0.0208 | -0.0032  | 0.0048 |
| Non-cancer illness code self-reported: iron deficiency anaemia                                                                                         | European  | 0.1292  | 0.1388 | 0.9303  | 3.52E-01 | 0.0040 | 0.0013 | 0.9940 | 0.0064 | 0.0006   | 0.0049 |
| Leg predicted mass (right)                                                                                                                             | European  | 0.0325  | 0.0349 | 0.9294  | 3.53E-01 | 0.2648 | 0.0117 | 1.1110 | 0.0275 | 0.0060   | 0.0068 |
| Heel bone mineral density (BMD) T-score automated (right)                                                                                              | European  | 0.0484  | 0.0527 | 0.9174  | 3.59E-01 | 0.3032 | 0.0358 | 1.0291 | 0.0237 | -0.0085  | 0.0073 |
| Why stopped smoking: None of the above                                                                                                                 | European  | -0.0787 | 0.0859 | -0.9157 | 3.60E-01 | 0.0406 | 0.0061 | 0.9971 | 0.0068 | 0.0001   | 0.0055 |
| Diagnoses - main ICD10: M16 Coxarthrosis [arthrosis of hip]                                                                                            | European  | 0.0870  | 0.0972 | 0.8949  | 3.71E-01 | 0.0107 | 0.0018 | 1.0099 | 0.0083 | -0.0001  | 0.0053 |
| Average weekly spirits intake                                                                                                                          | European  | 0.0543  | 0.0627 | 0.8657  | 3.87E-01 | 0.0316 | 0.0028 | 1.0170 | 0.0080 | 0.0112   | 0.0055 |
| Non-cancer illness code self-reported: vaginal prolapse/uterine prolapse                                                                               | European  | 0.1258  | 0.1464 | 0.8594  | 3.90E-01 | 0.0045 | 0.0016 | 1.0074 | 0.0072 | 0.0045   | 0.0050 |
| Medication for cholesterol blood pressure or diabetes: Insulin                                                                                         | European  | 0.1152  | 0.1348 | 0.8553  | 3.92E-01 | 0.0099 | 0.0034 | 1.0104 | 0.0074 | 0.0135   | 0.0048 |
| Diagnoses - main ICD10: C61 Malignant neoplasm of prostate                                                                                             | European  | 0.1024  | 0.1216 | 0.8418  | 4.00E-01 | 0.0043 | 0.0015 | 1.0186 | 0.0073 | -0.0067  | 0.0050 |
| Snoring                                                                                                                                                | European  | -0.0396 | 0.0475 | -0.8343 | 4.04E-01 | 0.0594 | 0.0030 | 1.0252 | 0.0091 | 0.0009   | 0.0057 |
| Non-accidental death in close genetic family                                                                                                           | European  | 0.0987  | 0.1185 | 0.8327  | 4.05E-01 | 0.0190 | 0.0047 | 0.9930 | 0.0067 | -0.0014  | 0.0054 |
| Distance between home and job workplace                                                                                                                | European  | -0.1096 | 0.1318 | -0.8316 | 4.06E-01 | 0.0123 | 0.0032 | 1.0051 | 0.0064 | -0.0025  | 0.0053 |
| Non-cancer illness code self-reported: bone disorder                                                                                                   | European  | -0.2036 | 0.2456 | -0.8288 | 4.07E-01 | 0.0013 | 0.0012 | 1.0070 | 0.0065 | 0.0080   | 0.0050 |
| Handedness (chirality/laterality): Use both right and left hands equally                                                                               | European  | 0.1079  | 0.1309 | 0.8243  | 4.10E-01 | 0.0042 | 0.0014 | 1.0053 | 0.0068 | 0.0027   | 0.0047 |
| Diagnoses - main ICD10: F43 Reaction to severe stress and adjustment disorders                                                                         | European  | 0.3813  | 0.4656 | 0.8188  | 4.13E-01 | 0.0008 | 0.0013 | 1.0025 | 0.0059 | 0.0040   | 0.0048 |
| Heel bone mineral density (BMD) T-score automated (left)                                                                                               | European  | 0.0417  | 0.0524 | 0.7971  | 4.25E-01 | 0.3010 | 0.0355 | 1.0310 | 0.0231 | -0.0068  | 0.0075 |

| Trait                                                                          | ethnicity | rg      | SE     | z       | p        | h2_obs | se     | h2_int | se     | gcov_int | se     |
|--------------------------------------------------------------------------------|-----------|---------|--------|---------|----------|--------|--------|--------|--------|----------|--------|
| Non-cancer illness code self-reported: joint disorder                          | European  | 0.1480  | 0.1893 | 0.7819  | 4.34E-01 | 0.0020 | 0.0013 | 0.9924 | 0.0061 | -0.0006  | 0.0048 |
| Vitamin and mineral supplements: Vitamin E                                     | European  | 0.0839  | 0.1080 | 0.7764  | 4.38E-01 | 0.0070 | 0.0014 | 0.9926 | 0.0063 | 0.0069   | 0.0053 |
| Non-cancer illness code self-reported: hypopituitarism                         | European  | -0.2006 | 0.2584 | -0.7760 | 4.38E-01 | 0.0014 | 0.0012 | 0.9920 | 0.0064 | 0.0066   | 0.0054 |
| Non-cancer illness code self-reported: mania/bipolar disorder/manic depression | European  | 0.0851  | 0.1116 | 0.7626  | 4.46E-01 | 0.0058 | 0.0013 | 0.9992 | 0.0061 | 0.0013   | 0.0053 |
| Eye problems/disorders: Glaucoma                                               | European  | 0.0613  | 0.0806 | 0.7605  | 4.47E-01 | 0.0399 | 0.0055 | 1.0166 | 0.0081 | -0.0082  | 0.0053 |
| Illnesses of father: Prostate cancer                                           | European  | -0.0723 | 0.0960 | -0.7533 | 4.51E-01 | 0.0084 | 0.0019 | 1.0123 | 0.0085 | -0.0013  | 0.0052 |
| Non-cancer illness code self-reported: crohn's disease                         | European  | -0.1018 | 0.1362 | -0.7471 | 4.55E-01 | 0.0049 | 0.0015 | 1.0080 | 0.0069 | 0.0064   | 0.0055 |
| Morning/evening person (chronotype)                                            | European  | 0.0302  | 0.0409 | 0.7388  | 4.60E-01 | 0.1148 | 0.0044 | 1.0486 | 0.0125 | -0.0005  | 0.0058 |
| Eye problems/disorders: Cataract                                               | European  | 0.0751  | 0.1028 | 0.7300  | 4.65E-01 | 0.0232 | 0.0044 | 1.0137 | 0.0069 | -0.0019  | 0.0054 |
| Diagnoses - main ICD10: B37 Candidiasis                                        | European  | 0.4727  | 0.6523 | 0.7246  | 4.69E-01 | 0.0007 | 0.0014 | 1.0008 | 0.0066 | -0.0017  | 0.0044 |
| Vitamin and mineral supplements: Vitamin D                                     | European  | -0.0845 | 0.1177 | -0.7177 | 4.73E-01 | 0.0062 | 0.0016 | 0.9966 | 0.0073 | 0.0019   | 0.0053 |
| Had menopause                                                                  | European  | 0.0695  | 0.0982 | 0.7086  | 4.79E-01 | 0.0200 | 0.0042 | 1.0053 | 0.0071 | -0.0018  | 0.0058 |
| Diagnoses - main ICD10: K40 Inguinal hernia                                    | European  | -0.0532 | 0.0758 | -0.7018 | 4.83E-01 | 0.0184 | 0.0024 | 0.9917 | 0.0079 | -0.0017  | 0.0055 |
| Number of days/week walked 10+ minutes                                         | European  | 0.0350  | 0.0501 | 0.6998  | 4.84E-01 | 0.0421 | 0.0023 | 1.0113 | 0.0078 | -0.0004  | 0.0055 |
| Duration of fitness test                                                       | European  | -0.1062 | 0.1551 | -0.6847 | 4.94E-01 | 0.0205 | 0.0092 | 1.0042 | 0.0063 | -0.0115  | 0.0050 |
| Non-cancer illness code self-reported: vitiligo                                | European  | 0.1929  | 0.2825 | 0.6829  | 4.95E-01 | 0.0011 | 0.0014 | 0.9976 | 0.0072 | 0.0009   | 0.0049 |
| Diagnoses - main ICD10: K51 Ulcerative colitis                                 | European  | -0.0784 | 0.1161 | -0.6754 | 4.99E-01 | 0.0046 | 0.0016 | 1.0144 | 0.0073 | 0.0059   | 0.0047 |
| Vitamin and mineral supplements: None of the above                             | European  | -0.0391 | 0.0582 | -0.6720 | 5.02E-01 | 0.0301 | 0.0018 | 0.9942 | 0.0070 | -0.0031  | 0.0054 |
| Diagnoses - main ICD10: K76 Other diseases of liver                            | European  | 0.1062  | 0.1583 | 0.6710  | 5.02E-01 | 0.0035 | 0.0013 | 0.9938 | 0.0069 | 0.0049   | 0.0051 |
| Time spent using computer                                                      | European  | -0.0302 | 0.0459 | -0.6577 | 5.11E-01 | 0.0948 | 0.0043 | 1.0507 | 0.0105 | -0.0020  | 0.0067 |
| Duration of other exercises                                                    | European  | -0.0604 | 0.0973 | -0.6210 | 5.35E-01 | 0.0190 | 0.0031 | 1.0084 | 0.0070 | 0.0012   | 0.0054 |
| Illnesses of mother: Breast cancer                                             | European  | -0.0504 | 0.0846 | -0.5952 | 5.52E-01 | 0.0094 | 0.0020 | 1.0068 | 0.0086 | -0.0053  | 0.0045 |
| Reproducibility of spirometry measurement using ERS/ATS criteria               | European  | -0.0611 | 0.1027 | -0.5950 | 5.52E-01 | 0.0144 | 0.0023 | 1.0077 | 0.0073 | 0.0102   | 0.0058 |
| Non-cancer illness code self-reported: hyperthyroidism/thyrototoxicosis        | European  | 0.0605  | 0.1042 | 0.5810  | 5.61E-01 | 0.0087 | 0.0026 | 1.0063 | 0.0085 | -0.0002  | 0.0052 |
| Diagnoses - main ICD10: K35 Acute appendicitis                                 | European  | -0.0986 | 0.1719 | -0.5738 | 5.66E-01 | 0.0023 | 0.0013 | 1.0040 | 0.0066 | 0.0041   | 0.0053 |
| Whole body water mass                                                          | European  | 0.0187  | 0.0327 | 0.5729  | 5.67E-01 | 0.2899 | 0.0131 | 1.1271 | 0.0314 | 0.0086   | 0.0069 |
| Whole body fat-free mass                                                       | European  | 0.0186  | 0.0327 | 0.5684  | 5.70E-01 | 0.2898 | 0.0131 | 1.1282 | 0.0315 | 0.0082   | 0.0069 |
| Duration of strenuous sports                                                   | European  | 0.0835  | 0.1474 | 0.5662  | 5.71E-01 | 0.0321 | 0.0136 | 0.9932 | 0.0065 | 0.0034   | 0.0048 |
| Diagnoses - main ICD10: I30 Acute pericarditis                                 | European  | 0.1048  | 0.1903 | 0.5505  | 5.82E-01 | 0.0023 | 0.0015 | 0.9949 | 0.0069 | -0.0002  | 0.0052 |
| Non-cancer illness code self-reported: pernicious anaemia                      | European  | 0.0787  | 0.1443 | 0.5456  | 5.85E-01 | 0.0036 | 0.0013 | 0.9908 | 0.0067 | 0.0018   | 0.0052 |
| Non-cancer illness code self-reported: enlarged prostate                       | European  | 0.0513  | 0.0993 | 0.5169  | 6.05E-01 | 0.0063 | 0.0016 | 1.0036 | 0.0070 | 0.0007   | 0.0048 |
| Non-cancer illness code self-reported: arthritis (nos)                         | European  | 0.0948  | 0.1841 | 0.5150  | 6.07E-01 | 0.0020 | 0.0014 | 1.0135 | 0.0065 | 0.0041   | 0.0051 |
| Hair/balding pattern: Pattern 2                                                | European  | -0.0306 | 0.0606 | -0.5049 | 6.14E-01 | 0.0517 | 0.0062 | 1.0346 | 0.0141 | 0.0103   | 0.0053 |

| Trait                                                                                                 | ethnicity | rg      | SE     | z       | p        | h2_obs | se     | h2_int | se     | gcov_int | se     |
|-------------------------------------------------------------------------------------------------------|-----------|---------|--------|---------|----------|--------|--------|--------|--------|----------|--------|
| Ever taken oral contraceptive pill                                                                    | European  | 0.0410  | 0.0824 | 0.4981  | 6.18E-01 | 0.0199 | 0.0030 | 1.0101 | 0.0073 | 0.0030   | 0.0050 |
| Non-cancer illness code self-reported: varicose veins                                                 | European  | -0.0616 | 0.1241 | -0.4969 | 6.19E-01 | 0.0046 | 0.0014 | 1.0091 | 0.0067 | 0.0012   | 0.0050 |
| Cancer code self-reported: lung cancer                                                                | European  | 0.7449  | 1.6566 | 0.4497  | 6.53E-01 | 0.0003 | 0.0012 | 0.9934 | 0.0067 | -0.0053  | 0.0048 |
| Cancer code self-reported: prostate cancer                                                            | European  | 0.0448  | 0.1000 | 0.4481  | 6.54E-01 | 0.0062 | 0.0016 | 1.0143 | 0.0082 | -0.0099  | 0.0054 |
| Tinnitus: Yes now most or all of the time                                                             | European  | 0.0373  | 0.0836 | 0.4457  | 6.56E-01 | 0.0335 | 0.0049 | 1.0018 | 0.0070 | 0.0040   | 0.0054 |
| Alcohol drinker status: Never                                                                         | European  | 0.0356  | 0.0799 | 0.4456  | 6.56E-01 | 0.0142 | 0.0017 | 1.0175 | 0.0077 | 0.0070   | 0.0054 |
| Non-cancer illness code self-reported: hypertrophic cardiomyopathy (hcm / hocm)                       | European  | 0.1013  | 0.2320 | 0.4367  | 6.62E-01 | 0.0013 | 0.0013 | 1.0032 | 0.0068 | -0.0039  | 0.0049 |
| Non-cancer illness code self-reported: eczema/dermatitis                                              | European  | -0.0447 | 0.1035 | -0.4315 | 6.66E-01 | 0.0083 | 0.0021 | 1.0151 | 0.0073 | 0.0055   | 0.0055 |
| Number of days/week of vigorous physical activity 10+ minutes                                         | European  | 0.0237  | 0.0579 | 0.4092  | 6.82E-01 | 0.0378 | 0.0023 | 1.0165 | 0.0079 | 0.0011   | 0.0058 |
| Systolic blood pressure automated reading                                                             | European  | 0.0170  | 0.0434 | 0.3910  | 6.96E-01 | 0.1274 | 0.0060 | 1.0678 | 0.0171 | -0.0049  | 0.0066 |
| Non-cancer illness code self-reported: malabsorption/coeliac disease                                  | European  | 0.0399  | 0.1123 | 0.3548  | 7.23E-01 | 0.0171 | 0.0123 | 0.9928 | 0.0226 | -0.0004  | 0.0051 |
| Non-cancer illness code self-reported: osteoporosis                                                   | European  | 0.0327  | 0.0935 | 0.3503  | 7.26E-01 | 0.0147 | 0.0020 | 1.0018 | 0.0084 | 0.0042   | 0.0058 |
| Underlying (primary) cause of death: ICD10: E85.4 Organ-limited amyloidosis                           | European  | 0.0925  | 0.2726 | 0.3394  | 7.34E-01 | 0.0471 | 0.0597 | 1.0020 | 0.0073 | 0.0074   | 0.0050 |
| Types of transport used (excluding work): Public transport                                            | European  | -0.0218 | 0.0735 | -0.2962 | 7.67E-01 | 0.0223 | 0.0017 | 1.0251 | 0.0067 | -0.0026  | 0.0056 |
| Diagnoses - main ICD10: M70 Soft tissue disorders related to use overuse and pressure                 | European  | 0.0364  | 0.1247 | 0.2915  | 7.71E-01 | 0.0042 | 0.0013 | 0.9813 | 0.0067 | -0.0016  | 0.0047 |
| Diagnoses - main ICD10: D12 Benign neoplasm of colon rectum anus and anal canal                       | European  | -0.0280 | 0.0959 | -0.2914 | 7.71E-01 | 0.0085 | 0.0015 | 1.0043 | 0.0067 | 0.0094   | 0.0047 |
| Cancer code self-reported: malignant melanoma                                                         | European  | -0.0339 | 0.1163 | -0.2914 | 7.71E-01 | 0.0051 | 0.0017 | 0.9929 | 0.0066 | -0.0030  | 0.0046 |
| Ever had bowel cancer screening                                                                       | European  | 0.0237  | 0.0820 | 0.2883  | 7.73E-01 | 0.0130 | 0.0016 | 1.0198 | 0.0073 | 0.0071   | 0.0054 |
| Diagnoses - main ICD10: F31 Bipolar affective disorder                                                | European  | 0.0311  | 0.1149 | 0.2710  | 7.86E-01 | 0.0050 | 0.0015 | 0.9860 | 0.0072 | 0.0016   | 0.0051 |
| Diagnoses - main ICD10: J33 Nasal polyp                                                               | European  | -0.0391 | 0.1444 | -0.2710 | 7.86E-01 | 0.0034 | 0.0015 | 1.0059 | 0.0075 | 0.0026   | 0.0055 |
| Diagnoses - main ICD10: O75 Other complications of labour and delivery not elsewhere classified       | European  | -0.0387 | 0.1502 | -0.2578 | 7.97E-01 | 0.0027 | 0.0012 | 0.9903 | 0.0056 | -0.0018  | 0.0047 |
| Diagnoses - main ICD10: S52 Fracture of forearm                                                       | European  | 0.0352  | 0.1395 | 0.2525  | 8.01E-01 | 0.0064 | 0.0019 | 0.9992 | 0.0075 | -0.0066  | 0.0056 |
| Underlying (primary) cause of death: ICD10: J84.1 Other interstitial pulmonary diseases with fibrosis | European  | 0.0393  | 0.1644 | 0.2392  | 8.11E-01 | 0.1111 | 0.0612 | 0.9918 | 0.0064 | -0.0057  | 0.0049 |
| Handedness (chirality/laterality): Left-handed                                                        | European  | -0.0233 | 0.0976 | -0.2385 | 8.12E-01 | 0.0098 | 0.0017 | 1.0056 | 0.0073 | -0.0022  | 0.0056 |
| Pulse wave reflection index                                                                           | European  | -0.0174 | 0.0743 | -0.2339 | 8.15E-01 | 0.0539 | 0.0055 | 1.0103 | 0.0078 | -0.0027  | 0.0051 |
| Trunk predicted mass                                                                                  | European  | -0.0072 | 0.0314 | -0.2289 | 8.19E-01 | 0.2858 | 0.0135 | 1.1357 | 0.0329 | 0.0094   | 0.0069 |
| Cancer code self-reported: basal cell carcinoma                                                       | European  | -0.0190 | 0.0857 | -0.2212 | 8.25E-01 | 0.0103 | 0.0019 | 0.9981 | 0.0077 | 0.0001   | 0.0053 |
| Trunk fat-free mass                                                                                   | European  | -0.0065 | 0.0313 | -0.2081 | 8.35E-01 | 0.2874 | 0.0136 | 1.1363 | 0.0331 | 0.0093   | 0.0069 |
| Non-cancer illness code self-reported: ankylosing spondylitis                                         | European  | 0.0418  | 0.2082 | 0.2007  | 8.41E-01 | 0.0016 | 0.0015 | 1.0032 | 0.0070 | 0.0112   | 0.0051 |
| Non-cancer illness code self-reported: glaucoma                                                       | European  | -0.0132 | 0.0858 | -0.1543 | 8.77E-01 | 0.0116 | 0.0017 | 1.0108 | 0.0079 | -0.0041  | 0.0053 |

| Trait                                                                                                    | ethnicity | rg      | SE     | z       | p        | h2_obs | se     | h2_int | se     | gcov_int | se     |
|----------------------------------------------------------------------------------------------------------|-----------|---------|--------|---------|----------|--------|--------|--------|--------|----------|--------|
| Father still alive                                                                                       | European  | -0.0160 | 0.1056 | -0.1516 | 8.80E-01 | 0.0064 | 0.0015 | 1.0158 | 0.0070 | 0.0046   | 0.0050 |
| Potassium in urine                                                                                       | European  | 0.0079  | 0.0540 | 0.1464  | 8.84E-01 | 0.0430 | 0.0024 | 1.0155 | 0.0091 | -0.0009  | 0.0055 |
| Diagnoses - main ICD10: S76 Injury of muscle and tendon at hip and thigh level                           | European  | 0.0301  | 0.2125 | 0.1416  | 8.87E-01 | 0.0013 | 0.0012 | 0.9993 | 0.0066 | -0.0001  | 0.0047 |
| Mineral and other dietary supplements: Calcium                                                           | European  | -0.0108 | 0.0774 | -0.1399 | 8.89E-01 | 0.0122 | 0.0016 | 0.9992 | 0.0070 | 0.0011   | 0.0048 |
| Cancer code self-reported: small intestine/small bowel cancer                                            | European  | 0.0336  | 0.2742 | 0.1226  | 9.02E-01 | 0.0011 | 0.0014 | 0.9996 | 0.0067 | 0.0045   | 0.0051 |
| Most recent bowel cancer screening                                                                       | European  | -0.0185 | 0.1543 | -0.1200 | 9.05E-01 | 0.0116 | 0.0064 | 1.0118 | 0.0066 | 0.0054   | 0.0045 |
| Diagnoses - main ICD10: I80 Phlebitis and thrombophlebitis                                               | European  | 0.0116  | 0.1046 | 0.1113  | 9.11E-01 | 0.0083 | 0.0016 | 0.9925 | 0.0085 | 0.0005   | 0.0049 |
| Vitamin and mineral supplements: Multivitamins +/- minerals                                              | European  | 0.0062  | 0.0627 | 0.0986  | 9.22E-01 | 0.0237 | 0.0017 | 1.0072 | 0.0074 | 0.0056   | 0.0052 |
| Diagnoses - main ICD10: N40 Hyperplasia of prostate                                                      | European  | 0.0105  | 0.1102 | 0.0949  | 9.24E-01 | 0.0062 | 0.0015 | 1.0079 | 0.0068 | -0.0009  | 0.0049 |
| Diagnoses - main ICD10: I48 Atrial fibrillation and flutter                                              | European  | 0.0072  | 0.0836 | 0.0856  | 9.32E-01 | 0.0130 | 0.0020 | 1.0101 | 0.0080 | 0.0034   | 0.0050 |
| Diagnoses - main ICD10: N19 Unspecified renal failure                                                    | European  | -0.0133 | 0.1660 | -0.0803 | 9.36E-01 | 0.0030 | 0.0013 | 0.9992 | 0.0069 | -0.0010  | 0.0051 |
| Doctor diagnosed hayfever or allergic rhinitis                                                           | European  | -0.0039 | 0.0645 | -0.0612 | 9.51E-01 | 0.0803 | 0.0092 | 1.0057 | 0.0085 | 0.0026   | 0.0050 |
| Birth weight                                                                                             | European  | -0.0024 | 0.0455 | -0.0526 | 9.58E-01 | 0.1088 | 0.0067 | 1.0501 | 0.0139 | -0.0063  | 0.0063 |
| Diagnoses - main ICD10: K50 Crohn's disease [regional enteritis]                                         | European  | -0.0060 | 0.1326 | -0.0454 | 9.64E-01 | 0.0042 | 0.0014 | 1.0046 | 0.0069 | 0.0030   | 0.0051 |
| Fracture resulting from simple fall                                                                      | European  | -0.0032 | 0.1124 | -0.0289 | 9.77E-01 | 0.0535 | 0.0145 | 0.9913 | 0.0065 | -0.0058  | 0.0048 |
| Illness injury bereavement stress in last 2 years: Serious illness injury or assault of a close relative | European  | -0.0011 | 0.1034 | -0.0110 | 9.91E-01 | 0.0112 | 0.0017 | 1.0105 | 0.0073 | 0.0048   | 0.0057 |
| Non-cancer illness code self-reported: uterine fibroids                                                  | European  | 0.0003  | 0.1038 | 0.0032  | 9.98E-01 | 0.0068 | 0.0015 | 1.0093 | 0.0068 | 0.0024   | 0.0051 |

**eTable 8.** Genetic correlations for “covariate” Design

All results from LDhub analyses. Trait= trait against which genetic correlation was calculated. PMID= PMID for publication that belongs to tested summary statistics. rG= genetic correlation. SE= standard error for genetic correlation. Z= Z-score. p= P-value for genetic correlation analysis. ethnicity= sample ethnicity for sample referenced in “Trait” column. h2\_obs= Heritability on the observed scale for sample referenced in “Trait”. se= standard errors for variable reported in the cell to the left (i.e. h2\_obs, ht\_int, gcov\_int). h2\_int= LD score intercept for sample referenced in “Trait”. gcov\_int= cross-trait LD Score regression intercept.

| Trait                                                                    | PMID     | Category          | rg      | SE     | z       | p        | ethnicity | h2_obs | se     | h2_int | se     | gcov_int | se     |
|--------------------------------------------------------------------------|----------|-------------------|---------|--------|---------|----------|-----------|--------|--------|--------|--------|----------|--------|
| Age of first birth                                                       | 27798627 | reproductive      | -0.4085 | 0.0795 | -5.1409 | 2.73E-07 | European  | 0.0627 | 0.0035 | 0.9531 | 0.0080 | -0.0020  | 0.0057 |
| Years of schooling 2016                                                  | 27225129 | education         | -0.1986 | 0.0543 | -3.6550 | 3.00E-04 | European  | 0.1258 | 0.0045 | 0.9329 | 0.0101 | -0.0115  | 0.0060 |
| Intelligence                                                             | 28530673 | cognitive         | -0.2125 | 0.0660 | -3.2182 | 1.30E-03 | European  | 0.1874 | 0.0106 | 1.0115 | 0.0085 | 0.0052   | 0.0049 |
| Depressive symptoms                                                      | 27089181 | psychiatric       | 0.3906  | 0.1233 | 3.1685  | 1.50E-03 | European  | 0.0466 | 0.0037 | 1.0031 | 0.0072 | -0.0028  | 0.0055 |
| Lung cancer                                                              | 27488534 | cancer            | 0.3581  | 0.1213 | 2.9523  | 3.20E-03 | European  | 0.3251 | 0.0658 | 1.0120 | 0.0076 | -0.0047  | 0.0047 |
| Major depressive disorder                                                | 22472876 | psychiatric       | 0.4461  | 0.1535 | 2.9067  | 3.70E-03 | European  | 0.1585 | 0.0262 | 1.0102 | 0.0061 | -0.0031  | 0.0049 |
| Squamous cell lung cancer                                                | 27488534 | cancer            | 0.5792  | 0.2100 | 2.7588  | 5.80E-03 | European  | 0.0393 | 0.0123 | 1.0101 | 0.0065 | -0.0089  | 0.0054 |
| Lung cancer (squamous cell)                                              | 24880342 | cancer            | 0.6259  | 0.2300 | 2.7214  | 6.50E-03 | European  | 0.0520 | 0.0193 | 1.0057 | 0.0066 | -0.0116  | 0.0049 |
| Cigarettes smoked per day                                                | 20418890 | smoking behaviour | 0.3861  | 0.1424 | 2.7125  | 6.70E-03 | European  | 0.0565 | 0.0152 | 1.0073 | 0.0064 | -0.0011  | 0.0042 |
| Age at Menarche                                                          | 25231870 | reproductive      | -0.1679 | 0.0633 | -2.6539 | 8.00E-03 | European  | 0.2031 | 0.0101 | 0.9518 | 0.0118 | 0.0011   | 0.0061 |
| Excessive daytime sleepiness                                             | 27992416 | sleeping          | 0.2474  | 0.0933 | 2.6528  | 8.00E-03 | European  | 0.0532 | 0.0050 | 1.0049 | 0.0071 | -0.0091  | 0.0049 |
| Height_2010                                                              | 20881960 | anthropometric    | -0.1597 | 0.0609 | -2.6220 | 8.70E-03 | European  | 0.2863 | 0.0163 | 1.0166 | 0.0188 | 0.0058   | 0.0065 |
| Lung adenocarcinoma                                                      | 27488534 | cancer            | 0.4737  | 0.1844 | 2.5682  | 1.02E-02 | European  | 0.0348 | 0.0118 | 1.0162 | 0.0070 | -0.0074  | 0.0047 |
| Lung cancer (all)                                                        | 24880342 | cancer            | 0.3427  | 0.1337 | 2.5630  | 1.04E-02 | European  | 0.1314 | 0.0295 | 1.0059 | 0.0083 | -0.0041  | 0.0048 |
| Description of average fatty acid chain length; not actual carbon number | 27005778 | metabolites       | -0.5297 | 0.2152 | -2.4612 | 1.38E-02 | European  | 0.1008 | 0.0351 | 0.9831 | 0.0070 | 0.0088   | 0.0048 |
| Schizophrenia                                                            | 25056061 | psychiatric       | 0.1519  | 0.0665 | 2.2825  | 2.25E-02 | Mixed     | 0.4573 | 0.0192 | 1.0551 | 0.0131 | 0.0013   | 0.0068 |
| Ever vs never smoked                                                     | 20418890 | smoking behaviour | 0.2435  | 0.1070 | 2.2747  | 2.29E-02 | European  | 0.0750 | 0.0065 | 0.9973 | 0.0061 | 0.0014   | 0.0047 |



| Trait                                                                    | PMID     | Category        | rg      | SE     | z       | p        | ethnicity | h2_obs | se     | h2_int | se     | gcov_int | se     |
|--------------------------------------------------------------------------|----------|-----------------|---------|--------|---------|----------|-----------|--------|--------|--------|--------|----------|--------|
| Coronary artery disease                                                  | 26343387 | cardiometabolic | 0.1582  | 0.0698 | 2.2667  | 2.34E-02 | Mixed     | 0.0785 | 0.0057 | 1.0478 | 0.0096 | 0.0040   | 0.0057 |
| Ratio of bisallylic groups to double bonds                               | 27005778 | metabolites     | -0.2754 | 0.1220 | -2.2579 | 2.40E-02 | European  | 0.2972 | 0.1066 | 0.9772 | 0.0095 | 0.0073   | 0.0044 |
| Mothers age at death                                                     | 27015805 | aging           | -0.3198 | 0.1457 | -2.1939 | 2.82E-02 | European  | 0.0369 | 0.0072 | 1.0110 | 0.0069 | 0.0030   | 0.0052 |
| Ratio of bisallylic groups to total fatty acids                          | 27005778 | metabolites     | -0.2916 | 0.1359 | -2.1464 | 3.18E-02 | European  | 0.2753 | 0.0951 | 0.9856 | 0.0083 | 0.0064   | 0.0046 |
| Insomnia                                                                 | 28604731 | sleeping        | 0.2226  | 0.1046 | 2.1284  | 3.33E-02 | European  | 0.0470 | 0.0050 | 1.0041 | 0.0070 | -0.0008  | 0.0050 |
| Neuroticism                                                              | 27089181 | personality     | 0.2646  | 0.1261 | 2.0976  | 3.59E-02 | European  | 0.0888 | 0.0078 | 0.9915 | 0.0126 | 0.0039   | 0.0068 |
| Albumin                                                                  | 27005778 | metabolites     | 0.4138  | 0.2027 | 2.0414  | 4.12E-02 | European  | 0.0604 | 0.0246 | 0.9896 | 0.0070 | -0.0018  | 0.0042 |
| Overweight                                                               | 23563607 | anthropometric  | 0.1393  | 0.0706 | 1.9739  | 4.84E-02 | European  | 0.1096 | 0.0065 | 1.0242 | 0.0096 | 0.0009   | 0.0057 |
| Obesity class 1                                                          | 23563607 | anthropometric  | 0.1385  | 0.0705 | 1.9648  | 4.94E-02 | European  | 0.2171 | 0.0114 | 1.0184 | 0.0114 | 0.0026   | 0.0061 |
| College completion                                                       | 23722424 | education       | -0.1733 | 0.0912 | -1.8997 | 5.75E-02 | European  | 0.0793 | 0.0057 | 1.0209 | 0.0086 | -0.0066  | 0.0060 |
| Neuroticism                                                              | 24828478 | personality     | 0.3419  | 0.1870 | 1.8282  | 6.75E-02 | European  | 0.0136 | 0.0034 | 1.0125 | 0.0064 | 0.0049   | 0.0049 |
| Concentration of medium HDL particles                                    | 27005778 | metabolites     | 0.3605  | 0.1990 | 1.8112  | 7.01E-02 | European  | 0.0692 | 0.0259 | 0.9930 | 0.0077 | -0.0052  | 0.0044 |
| Average number of methylene groups per a double bond                     | 27005778 | metabolites     | 0.2648  | 0.1466 | 1.8065  | 7.08E-02 | European  | 0.2012 | 0.0779 | 0.9959 | 0.0084 | -0.0054  | 0.0045 |
| Subjective well being                                                    | 27089181 | psychiatric     | -0.1893 | 0.1053 | -1.7972 | 7.23E-02 | European  | 0.0249 | 0.0021 | 1.0027 | 0.0075 | 0.0050   | 0.0057 |
| Total lipids in medium HDL                                               | 27005778 | metabolites     | 0.3759  | 0.2099 | 1.7915  | 7.32E-02 | European  | 0.0648 | 0.0262 | 0.9948 | 0.0080 | -0.0061  | 0.0044 |
| Tyrosine                                                                 | 27005778 | metabolites     | 0.3106  | 0.1739 | 1.7861  | 7.41E-02 | European  | 0.0770 | 0.0272 | 0.9980 | 0.0069 | -0.0084  | 0.0047 |
| Years of schooling (proxy cognitive performance)                         | 25201988 | education       | -0.1580 | 0.0898 | -1.7585 | 7.87E-02 | European  | 0.1065 | 0.0073 | 1.0274 | 0.0090 | -0.0101  | 0.0066 |
| Cholesterol esters in medium HDL                                         | 27005778 | metabolites     | 0.4154  | 0.2364 | 1.7570  | 7.89E-02 | European  | 0.0568 | 0.0284 | 0.9997 | 0.0088 | -0.0082  | 0.0044 |
| Lumbar Spine bone mineral density                                        | 26367794 | bone            | 0.1708  | 0.0979 | 1.7453  | 8.09E-02 | Mixed     | 0.1267 | 0.0157 | 0.9813 | 0.0084 | -0.0078  | 0.0052 |
| Forced expiratory volume in 1 second (FEV1)/ Forced Vital capacity (FVC) | 21946350 | lung function   | -0.1606 | 0.0931 | -1.7243 | 8.47E-02 | European  | 0.1239 | 0.0136 | 0.9283 | 0.0077 | 0.0064   | 0.0051 |

| Trait                                                                    | PMID     | Category       | rg      | SE     | z       | p        | ethnicity | h2_obs | se     | h2_int | se     | gcov_int | se     |
|--------------------------------------------------------------------------|----------|----------------|---------|--------|---------|----------|-----------|--------|--------|--------|--------|----------|--------|
| PGC cross-disorder analysis                                              | 23453885 | psychiatric    | 0.1525  | 0.0911 | 1.6738  | 9.42E-02 | European  | 0.1714 | 0.0133 | 1.0154 | 0.0114 | 0.0051   | 0.0067 |
| Multiple sclerosis                                                       | 21833088 | autoimmune     | 0.4905  | 0.2937 | 1.6702  | 9.49E-02 | European  | 0.0572 | 0.0275 | 1.0588 | 0.0089 | -0.0029  | 0.0056 |
| Citrate                                                                  | 27005778 | metabolites    | -0.2693 | 0.1645 | -1.6372 | 1.02E-01 | European  | 0.0674 | 0.0215 | 1.0135 | 0.0074 | -0.0034  | 0.0049 |
| Average number of double bonds in a fatty acid chain                     | 27005778 | metabolites    | -0.2429 | 0.1490 | -1.6301 | 1.03E-01 | European  | 0.1713 | 0.0530 | 1.0019 | 0.0079 | 0.0052   | 0.0046 |
| Forced expiratory volume in 1 second (FEV1)/ Forced Vital capacity (FVC) | 28166213 | lung function  | -0.1262 | 0.0781 | -1.6161 | 1.06E-01 | European  | 0.2607 | 0.0214 | 0.9717 | 0.0092 | 0.0050   | 0.0049 |
| Years of schooling 2013                                                  | 23722424 | education      | -0.1456 | 0.0910 | -1.6004 | 1.10E-01 | European  | 0.0841 | 0.0064 | 1.0195 | 0.0091 | -0.0083  | 0.0061 |
| Obesity class 2                                                          | 23563607 | anthropometric | 0.1188  | 0.0753 | 1.5771  | 1.15E-01 | European  | 0.1843 | 0.0123 | 1.0022 | 0.0097 | 0.0005   | 0.0062 |
| HbA1C                                                                    | 20858683 | glycemic       | 0.1902  | 0.1227 | 1.5495  | 1.21E-01 | European  | 0.0649 | 0.0120 | 0.9995 | 0.0073 | -0.0046  | 0.0045 |
| Neo-openness to experience                                               | 21173776 | personality    | 0.2768  | 0.1788 | 1.5483  | 1.22E-01 | European  | 0.1063 | 0.0264 | 0.9916 | 0.0065 | -0.0086  | 0.0056 |
| Extreme waist-to-hip ratio                                               | 23563607 | anthropometric | 0.2362  | 0.1544 | 1.5302  | 1.26E-01 | European  | 0.3641 | 0.0596 | 0.9765 | 0.0089 | -0.0027  | 0.0064 |
| Age at Menopause                                                         | 26414677 | reproductive   | -0.1233 | 0.0814 | -1.5138 | 1.30E-01 | European  | 0.1355 | 0.0156 | 0.9904 | 0.0140 | -0.0025  | 0.0053 |
| Forced expiratory volume in 1 second (FEV1)/ Forced Vital capacity (FVC) | 26635082 | lung function  | -0.1719 | 0.1144 | -1.5024 | 1.33E-01 | European  | 0.1142 | 0.0149 | 0.9808 | 0.0069 | 0.0025   | 0.0049 |
| Number of children ever born                                             | 27798627 | reproductive   | 0.1382  | 0.0920 | 1.5023  | 1.33E-01 | European  | 0.0255 | 0.0017 | 0.9713 | 0.0069 | 0.0012   | 0.0051 |
| Omega-9 and saturated fatty acids                                        | 27005778 | metabolites    | 0.3081  | 0.2097 | 1.4692  | 1.42E-01 | European  | 0.0904 | 0.0448 | 0.9950 | 0.0082 | -0.0015  | 0.0046 |
| Lumbar spine bone mineral density                                        | 22504420 | bone           | 0.1264  | 0.0863 | 1.4651  | 1.43E-01 | Mixed     | 0.2699 | 0.0244 | 1.0133 | 0.0086 | -0.0075  | 0.0052 |
| Mean platelet volume                                                     | 22139419 | haematological | 0.1677  | 0.1153 | 1.4544  | 1.46E-01 | European  | 0.3215 | 0.0523 | 0.9808 | 0.0109 | -0.0060  | 0.0057 |
| Total cholesterol in medium HDL                                          | 27005778 | metabolites    | 0.3058  | 0.2131 | 1.4349  | 1.51E-01 | European  | 0.0570 | 0.0250 | 0.9979 | 0.0088 | -0.0060  | 0.0045 |
| Concentration of chylomicrons and largest VLDL particles                 | 27005778 | metabolites    | 0.2075  | 0.1462 | 1.4192  | 1.56E-01 | European  | 0.1135 | 0.0271 | 0.9893 | 0.0070 | 0.0000   | 0.0047 |

| Trait                                                    | PMID     | Category          | rg      | SE     | z       | p        | ethnicity | h2_obs | se     | h2_int | se     | gcov_int | se     |
|----------------------------------------------------------|----------|-------------------|---------|--------|---------|----------|-----------|--------|--------|--------|--------|----------|--------|
| Femoral neck bone mineral density                        | 22504420 | bone              | 0.1105  | 0.0794 | 1.3907  | 1.64E-01 | Mixed     | 0.3025 | 0.0249 | 0.9809 | 0.0083 | 0.0023   | 0.0049 |
| Adiponectin                                              | 22479202 | cardiometabolic   | 0.1711  | 0.1257 | 1.3608  | 1.74E-01 | Mixed     | 0.1194 | 0.0261 | 1.0228 | 0.0125 | -0.0051  | 0.0049 |
| 2hr glucose adjusted for BMI                             | 20081857 | glycemic          | 0.2778  | 0.2066 | 1.3446  | 1.79E-01 | European  | 0.1040 | 0.0341 | 0.9933 | 0.0071 | -0.0065  | 0.0051 |
| Childhood obesity                                        | 22484627 | anthropometric    | 0.1252  | 0.0935 | 1.3398  | 1.80E-01 | European  | 0.4199 | 0.0461 | 0.9248 | 0.0076 | -0.0010  | 0.0053 |
| Body fat                                                 | 26833246 | anthropometric    | 0.1337  | 0.1001 | 1.3365  | 1.81E-01 | Mixed     | 0.1063 | 0.0082 | 0.9055 | 0.0064 | -0.0019  | 0.0057 |
| Glycoprotein acetyls; mainly a1-acid glycoprotein        | 27005778 | metabolites       | 0.2123  | 0.1634 | 1.2992  | 1.94E-01 | European  | 0.0972 | 0.0297 | 0.9867 | 0.0065 | 0.0013   | 0.0044 |
| Waist-to-hip ratio                                       | 25673412 | anthropometric    | 0.0827  | 0.0640 | 1.2922  | 1.96E-01 | European  | 0.1139 | 0.0071 | 0.9186 | 0.0092 | 0.0075   | 0.0049 |
| Systemic lupus erythematosus                             | 26502338 | autoimmune        | 0.1815  | 0.1411 | 1.2862  | 1.98E-01 | European  | 0.3874 | 0.0677 | 1.1065 | 0.0102 | -0.0042  | 0.0064 |
| Phospholipids in medium HDL                              | 27005778 | metabolites       | 0.2322  | 0.1806 | 1.2857  | 1.99E-01 | European  | 0.0721 | 0.0233 | 0.9928 | 0.0079 | -0.0030  | 0.0045 |
| Forced expiratory volume in 1 second (FEV1)              | 28166213 | lung function     | -0.1008 | 0.0787 | -1.2805 | 2.00E-01 | European  | 0.2642 | 0.0179 | 0.9723 | 0.0078 | 0.0035   | 0.0049 |
| Extreme height                                           | 23563607 | anthropometric    | -0.1084 | 0.0858 | -1.2630 | 2.07E-01 | European  | 1.2364 | 0.1090 | 1.0345 | 0.0180 | -0.0023  | 0.0075 |
| Anorexia Nervosa                                         | 24514567 | psychiatric       | 0.1206  | 0.0964 | 1.2501  | 2.11E-01 | European  | 0.5535 | 0.0315 | 0.8995 | 0.0073 | -0.0080  | 0.0055 |
| Free cholesterol in medium HDL                           | 27005778 | metabolites       | 0.2313  | 0.1868 | 1.2385  | 2.16E-01 | European  | 0.0705 | 0.0236 | 0.9962 | 0.0083 | -0.0038  | 0.0045 |
| Parkinsons disease                                       | 19915575 | neurological      | -0.1446 | 0.1178 | -1.2274 | 2.20E-01 | European  | 0.3807 | 0.1104 | 1.1266 | 0.0087 | 0.0046   | 0.0043 |
| Mono-unsaturated fatty acids                             | 27005778 | metabolites       | 0.2253  | 0.1837 | 1.2266  | 2.20E-01 | European  | 0.1094 | 0.0432 | 0.9869 | 0.0083 | 0.0002   | 0.0046 |
| Phospholipids in chylomicrons and largest VLDL particles | 27005778 | metabolites       | 0.1622  | 0.1337 | 1.2133  | 2.25E-01 | European  | 0.1005 | 0.0272 | 0.9837 | 0.0065 | -0.0008  | 0.0047 |
| Forearm Bone mineral density                             | 26367794 | bone              | 0.2796  | 0.2318 | 1.2063  | 2.28E-01 | Mixed     | 0.0858 | 0.0438 | 1.0120 | 0.0071 | -0.0054  | 0.0043 |
| Free cholesterol in very large HDL                       | 27005778 | metabolites       | -0.3096 | 0.2590 | -1.1956 | 2.32E-01 | European  | 0.0489 | 0.0253 | 1.0145 | 0.0141 | 0.0076   | 0.0052 |
| Total lipids in small HDL                                | 27005778 | metabolites       | 0.2821  | 0.2370 | 1.1903  | 2.34E-01 | European  | 0.0534 | 0.0267 | 1.0030 | 0.0076 | -0.0025  | 0.0048 |
| Former vs Current smoker                                 | 20418890 | smoking behaviour | -0.1845 | 0.1600 | -1.1534 | 2.49E-01 | European  | 0.0598 | 0.0106 | 1.0033 | 0.0066 | -0.0025  | 0.0050 |
| Body mass index                                          | 20935630 | anthropometric    | 0.0680  | 0.0599 | 1.1361  | 2.56E-01 | European  | 0.1894 | 0.0097 | 1.0109 | 0.0106 | 0.0042   | 0.0053 |
| Childhood IQ                                             | 23358156 | education         | -0.1478 | 0.1303 | -1.1345 | 2.57E-01 | European  | 0.2714 | 0.0457 | 1.0028 | 0.0092 | -0.0056  | 0.0057 |
| Glucose                                                  | 27005778 | metabolites       | 0.1699  | 0.1510 | 1.1256  | 2.60E-01 | European  | 0.0891 | 0.0218 | 0.9944 | 0.0068 | -0.0067  | 0.0045 |

| Trait                                            | PMID     | Category       | rg      | SE     | z       | p        | ethnicity | h2_obs | se     | h2_int | se     | gcov_int | se     |
|--------------------------------------------------|----------|----------------|---------|--------|---------|----------|-----------|--------|--------|--------|--------|----------|--------|
| Infant head circumference                        | 22504419 | anthropometric | -0.1773 | 0.1585 | -1.1188 | 2.63E-01 | European  | 0.2229 | 0.0453 | 0.9921 | 0.0066 | 0.0007   | 0.0051 |
| Phenylalanine                                    | 27005778 | metabolites    | 0.2565  | 0.2298 | 1.1160  | 2.64E-01 | European  | 0.0550 | 0.0222 | 1.0042 | 0.0068 | 0.0017   | 0.0054 |
| Concentration of large VLDL particles            | 27005778 | metabolites    | 0.1306  | 0.1184 | 1.1030  | 2.70E-01 | European  | 0.1315 | 0.0353 | 0.9740 | 0.0071 | -0.0003  | 0.0043 |
| Rheumatoid Arthritis                             | 24390342 | autoimmune     | 0.1001  | 0.0935 | 1.0704  | 2.84E-01 | European  | 0.1585 | 0.0293 | 1.0250 | 0.0169 | 0.0030   | 0.0049 |
| 22: 6 docosaheaxaenoic acid                      | 27005778 | metabolites    | -0.1635 | 0.1542 | -1.0600 | 2.89E-01 | European  | 0.1323 | 0.0380 | 0.9953 | 0.0077 | 0.0017   | 0.0044 |
| Sitting height ratio                             | 25865494 | anthropometric | 0.1248  | 0.1180 | 1.0577  | 2.90E-01 | European  | 0.2284 | 0.0283 | 0.9772 | 0.0078 | -0.0048  | 0.0055 |
| Total cholesterol in very large HDL              | 27005778 | metabolites    | -0.3270 | 0.3150 | -1.0381 | 2.99E-01 | European  | 0.0363 | 0.0233 | 1.0122 | 0.0118 | 0.0080   | 0.0050 |
| Leucine                                          | 27005778 | metabolites    | 0.2303  | 0.2275 | 1.0123  | 3.11E-01 | European  | 0.0450 | 0.0217 | 1.0093 | 0.0073 | -0.0056  | 0.0051 |
| Creatinine                                       | 27005778 | metabolites    | -0.1363 | 0.1353 | -1.0074 | 3.14E-01 | European  | 0.1149 | 0.0246 | 1.0121 | 0.0074 | 0.0000   | 0.0050 |
| Attention deficit hyperactivity disorder (GC)    | 27663945 | psychiatric    | 0.2079  | 0.2071 | 1.0039  | 3.15E-01 | European  | 0.0725 | 0.0294 | 0.9928 | 0.0075 | 0.0092   | 0.0051 |
| Attention deficit hyperactivity disorder (No GC) | 27663945 | psychiatric    | 0.2070  | 0.2072 | 0.9989  | 3.18E-01 | European  | 0.0734 | 0.0299 | 1.0075 | 0.0076 | 0.0093   | 0.0052 |
| Transferrin                                      | 25352340 | metal          | -0.1213 | 0.1292 | -0.9389 | 3.48E-01 | European  | 0.1623 | 0.0770 | 1.0622 | 0.0242 | 0.0026   | 0.0059 |
| Chronic Kidney Disease                           | 26831199 | kidney         | 0.1701  | 0.1867 | 0.9109  | 3.62E-01 | Mixed     | 0.0176 | 0.0059 | 1.0180 | 0.0091 | -0.0040  | 0.0052 |
| Concentration of very large VLDL particles       | 27005778 | metabolites    | 0.1275  | 0.1400 | 0.9103  | 3.63E-01 | European  | 0.1220 | 0.0293 | 0.9843 | 0.0072 | -0.0004  | 0.0048 |
| Eczema                                           | 26482879 | autoimmune     | -0.1258 | 0.1452 | -0.8669 | 3.86E-01 | Mixed     | 0.0681 | 0.0154 | 1.0234 | 0.0074 | 0.0107   | 0.0048 |
| Waist circumference                              | 25673412 | anthropometric | 0.0523  | 0.0607 | 0.8620  | 3.89E-01 | European  | 0.1220 | 0.0051 | 0.8431 | 0.0080 | 0.0091   | 0.0051 |
| Extreme BMI                                      | 23563607 | anthropometric | 0.0776  | 0.0911 | 0.8518  | 3.94E-01 | European  | 0.6930 | 0.0540 | 1.0296 | 0.0114 | 0.0016   | 0.0068 |
| Forced Vital capacity (FVC)                      | 28166213 | lung function  | -0.0672 | 0.0792 | -0.8480 | 3.96E-01 | European  | 0.2578 | 0.0165 | 0.9794 | 0.0077 | 0.0012   | 0.0050 |
| Isoleucine                                       | 27005778 | metabolites    | 0.1433  | 0.1698 | 0.8443  | 3.99E-01 | European  | 0.0686 | 0.0241 | 0.9958 | 0.0070 | -0.0046  | 0.0052 |
| Valine                                           | 27005778 | metabolites    | 0.1535  | 0.1862 | 0.8245  | 4.10E-01 | European  | 0.0611 | 0.0201 | 1.0150 | 0.0079 | -0.0043  | 0.0047 |
| Sleep duration                                   | 27494321 | sleeping       | -0.0880 | 0.1075 | -0.8186 | 4.13E-01 | European  | 0.0545 | 0.0052 | 1.0225 | 0.0081 | -0.0043  | 0.0050 |
| Type 2 Diabetes                                  | 22885922 | glycemic       | 0.0822  | 0.1020 | 0.8060  | 4.20E-01 | European  | 0.0882 | 0.0094 | 1.0081 | 0.0072 | 0.0002   | 0.0046 |
| Amyotrophic lateral sclerosis                    | 27455348 | neurological   | 0.1544  | 0.1944 | 0.7944  | 4.27E-01 | European  | 0.0507 | 0.0131 | 0.9934 | 0.0064 | 0.0002   | 0.0050 |

| Trait                                                          | PMID     | Category       | rg      | SE     | z       | p        | ethnicity | h2_obs | se     | h2_int | se     | gcov_int | se     |
|----------------------------------------------------------------|----------|----------------|---------|--------|---------|----------|-----------|--------|--------|--------|--------|----------|--------|
| Free cholesterol                                               | 27005778 | metabolites    | -0.1865 | 0.2361 | -0.7902 | 4.29E-01 | European  | 0.0687 | 0.0429 | 1.0231 | 0.0110 | 0.0049   | 0.0048 |
| Alzheimer's disease                                            | 24162737 | neurological   | 0.1237  | 0.1609 | 0.7692  | 4.42E-01 | European  | 0.0429 | 0.0225 | 1.0681 | 0.0303 | -0.0071  | 0.0049 |
| Insomnia                                                       | 27992416 | sleeping       | 0.0787  | 0.1034 | 0.7608  | 4.47E-01 | European  | 0.1332 | 0.0120 | 1.0028 | 0.0080 | 0.0057   | 0.0054 |
| Asthma                                                         | 17611496 | autoimmune     | 0.1080  | 0.1432 | 0.7545  | 4.51E-01 | European  | 0.1229 | 0.0279 | 1.0074 | 0.0089 | 0.0002   | 0.0053 |
| 18: 2 linoleic acid (LA)                                       | 27005778 | metabolites    | -0.1216 | 0.1652 | -0.7361 | 4.62E-01 | European  | 0.1222 | 0.0489 | 1.0045 | 0.0100 | 0.0056   | 0.0048 |
| Total cholesterol in small LDL                                 | 27005778 | metabolites    | -0.1429 | 0.1944 | -0.7352 | 4.62E-01 | European  | 0.0683 | 0.0451 | 1.0168 | 0.0198 | 0.0087   | 0.0048 |
| Total lipids in large VLDL                                     | 27005778 | metabolites    | 0.0878  | 0.1214 | 0.7232  | 4.70E-01 | European  | 0.1355 | 0.0312 | 0.9867 | 0.0068 | 0.0018   | 0.0046 |
| Total cholesterol in large VLDL                                | 27005778 | metabolites    | -0.0857 | 0.1199 | -0.7145 | 4.75E-01 | European  | 0.1191 | 0.0297 | 0.9906 | 0.0068 | 0.0055   | 0.0042 |
| Inflammatory Bowel Disease (Euro)                              | 26192919 | autoimmune     | -0.0591 | 0.0834 | -0.7091 | 4.78E-01 | European  | 0.3296 | 0.0354 | 1.0566 | 0.0112 | 0.0059   | 0.0055 |
| Phospholipids in large HDL                                     | 27005778 | metabolites    | 0.0964  | 0.1388 | 0.6944  | 4.88E-01 | European  | 0.1269 | 0.0306 | 0.9986 | 0.0144 | -0.0034  | 0.0045 |
| Difference in height between adolescence and adulthood; age 14 | 23449627 | anthropometric | -0.1260 | 0.1815 | -0.6938 | 4.88E-01 | European  | 0.4451 | 0.1124 | 0.9818 | 0.0070 | 0.0030   | 0.0052 |
| Total lipids in very large VLDL                                | 27005778 | metabolites    | 0.0830  | 0.1210 | 0.6854  | 4.93E-01 | European  | 0.1391 | 0.0304 | 0.9774 | 0.0071 | 0.0007   | 0.0045 |
| Femoral Neck bone mineral density                              | 26367794 | bone           | 0.0612  | 0.0929 | 0.6583  | 5.10E-01 | Mixed     | 0.1242 | 0.0149 | 0.9772 | 0.0083 | 0.0011   | 0.0051 |
| Total lipids in very large HDL                                 | 27005778 | metabolites    | -0.1575 | 0.2406 | -0.6549 | 5.13E-01 | European  | 0.0615 | 0.0282 | 1.0158 | 0.0153 | 0.0059   | 0.0052 |
| HDL cholesterol                                                | 20686565 | lipids         | -0.0452 | 0.0710 | -0.6363 | 5.25E-01 | European  | 0.1267 | 0.0240 | 1.0601 | 0.0508 | -0.0069  | 0.0053 |
| Mean diameter for VLDL particles                               | 27005778 | metabolites    | 0.0811  | 0.1277 | 0.6345  | 5.26E-01 | European  | 0.1340 | 0.0349 | 0.9903 | 0.0088 | -0.0022  | 0.0046 |
| Ulcerative colitis                                             | 26192919 | autoimmune     | -0.0692 | 0.1093 | -0.6338 | 5.26E-01 | European  | 0.2526 | 0.0331 | 1.0505 | 0.0106 | 0.0019   | 0.0055 |
| Forced expiratory volume in 1 second (FEV1)                    | 26635082 | lung function  | -0.0611 | 0.0973 | -0.6284 | 5.30E-01 | European  | 0.1421 | 0.0161 | 0.9909 | 0.0068 | -0.0018  | 0.0048 |
| Primary biliary cirrhosis                                      | 26394269 | autoimmune     | 0.0728  | 0.1171 | 0.6221  | 5.34E-01 | European  | 0.3818 | 0.0645 | 1.0024 | 0.0100 | 0.0067   | 0.0058 |
| Phospholipids in large VLDL                                    | 27005778 | metabolites    | 0.0774  | 0.1249 | 0.6193  | 5.36E-01 | European  | 0.1131 | 0.0317 | 0.9909 | 0.0068 | 0.0024   | 0.0047 |
| Fathers age at death                                           | 27015805 | aging          | -0.0944 | 0.1538 | -0.6139 | 5.39E-01 | European  | 0.0403 | 0.0068 | 1.0171 | 0.0070 | -0.0051  | 0.0049 |

| Trait                                                   | PMID     | Category       | rg      | SE     | z       | p        | ethnicity | h2_obs | se     | h2_int | se     | gcov_int | se     |
|---------------------------------------------------------|----------|----------------|---------|--------|---------|----------|-----------|--------|--------|--------|--------|----------|--------|
| Neo-conscientiousness                                   | 21173776 | personality    | -0.1322 | 0.2206 | -0.5992 | 5.49E-01 | European  | 0.0719 | 0.0291 | 1.0006 | 0.0069 | 0.0008   | 0.0052 |
| Concentration of large HDL particles                    | 27005778 | metabolites    | 0.0819  | 0.1385 | 0.5918  | 5.54E-01 | European  | 0.1317 | 0.0305 | 1.0000 | 0.0155 | -0.0024  | 0.0046 |
| Urate                                                   | 23263486 | other          | 0.0317  | 0.0552 | 0.5737  | 5.66E-01 | European  | 0.1780 | 0.0596 | 0.9499 | 0.0517 | 0.0032   | 0.0048 |
| Total cholesterol in small VLDL                         | 27005778 | metabolites    | -0.0892 | 0.1565 | -0.5702 | 5.69E-01 | European  | 0.0866 | 0.0319 | 1.0070 | 0.0098 | 0.0064   | 0.0043 |
| Triglycerides in large VLDL                             | 27005778 | metabolites    | 0.0695  | 0.1231 | 0.5642  | 5.73E-01 | European  | 0.1100 | 0.0297 | 0.9895 | 0.0066 | 0.0032   | 0.0046 |
| Total lipids in chylomicrons and largest VLDL particles | 27005778 | metabolites    | 0.0757  | 0.1364 | 0.5549  | 5.79E-01 | European  | 0.1233 | 0.0285 | 0.9887 | 0.0067 | 0.0012   | 0.0047 |
| Parents age at death                                    | 27015805 | aging          | -0.0903 | 0.1634 | -0.5525 | 5.81E-01 | European  | 0.0287 | 0.0069 | 1.0163 | 0.0066 | 0.0008   | 0.0047 |
| Free cholesterol in small VLDL                          | 27005778 | metabolites    | -0.0775 | 0.1411 | -0.5494 | 5.83E-01 | European  | 0.1079 | 0.0341 | 1.0014 | 0.0089 | 0.0072   | 0.0044 |
| Autism spectrum disorder                                | 0        | psychiatric    | 0.0684  | 0.1288 | 0.5312  | 5.95E-01 | European  | 0.4249 | 0.0520 | 0.9722 | 0.0067 | -0.0017  | 0.0050 |
| Cholesterol esters in large VLDL                        | 27005778 | metabolites    | 0.0623  | 0.1175 | 0.5298  | 5.96E-01 | European  | 0.1626 | 0.0347 | 0.9782 | 0.0072 | 0.0013   | 0.0045 |
| Concentration of medium VLDL particles                  | 27005778 | metabolites    | 0.0623  | 0.1184 | 0.5265  | 5.99E-01 | European  | 0.1462 | 0.0364 | 0.9818 | 0.0071 | 0.0027   | 0.0044 |
| Acetate                                                 | 27005778 | metabolites    | -0.0932 | 0.1807 | -0.5159 | 6.06E-01 | European  | 0.0532 | 0.0194 | 1.0024 | 0.0068 | 0.0029   | 0.0044 |
| Heart rate                                              | 23583979 | haematological | 0.0464  | 0.0960 | 0.4833  | 6.29E-01 | Mixed     | 0.0842 | 0.0092 | 1.0130 | 0.0086 | 0.0069   | 0.0055 |
| Fasting insulin main effect                             | 22581228 | glycemic       | 0.0626  | 0.1343 | 0.4661  | 6.41E-01 | European  | 0.0717 | 0.0099 | 1.0134 | 0.0070 | 0.0025   | 0.0050 |
| Concentration of very large HDL particles               | 27005778 | metabolites    | -0.1017 | 0.2209 | -0.4603 | 6.45E-01 | European  | 0.0654 | 0.0272 | 1.0021 | 0.0155 | 0.0031   | 0.0051 |
| Forced Vital capacity (FVC)                             | 26635082 | lung function  | 0.0467  | 0.1020 | 0.4580  | 6.47E-01 | European  | 0.1459 | 0.0155 | 0.9863 | 0.0068 | -0.0046  | 0.0047 |
| Bipolar disorder                                        | 21926972 | psychiatric    | 0.0470  | 0.1041 | 0.4516  | 6.52E-01 | European  | 0.4278 | 0.0376 | 1.0245 | 0.0076 | 0.0059   | 0.0053 |
| Crohn's disease                                         | 26192919 | autoimmune     | -0.0376 | 0.0838 | -0.4491 | 6.53E-01 | European  | 0.4982 | 0.0597 | 1.0245 | 0.0114 | 0.0071   | 0.0053 |
| Phospholipids in very large HDL                         | 27005778 | metabolites    | -0.0808 | 0.1828 | -0.4422 | 6.58E-01 | European  | 0.0906 | 0.0298 | 1.0085 | 0.0175 | 0.0027   | 0.0051 |
| Apolipoprotein B                                        | 27005778 | metabolites    | -0.0720 | 0.1633 | -0.4408 | 6.59E-01 | European  | 0.0830 | 0.0414 | 1.0082 | 0.0153 | 0.0082   | 0.0045 |
| Phospholipids in small VLDL                             | 27005778 | metabolites    | -0.0575 | 0.1319 | -0.4363 | 6.63E-01 | European  | 0.1110 | 0.0356 | 1.0007 | 0.0085 | 0.0064   | 0.0043 |
| HOMA-IR                                                 | 20081858 | glycemic       | 0.0737  | 0.1695 | 0.4349  | 6.64E-01 | European  | 0.0696 | 0.0124 | 1.0021 | 0.0064 | 0.0029   | 0.0048 |

| Trait                                                    | PMID     | Category       | rg      | SE     | z       | p        | ethnicity | h2_obs | se     | h2_int | se     | gcov_int | se     |
|----------------------------------------------------------|----------|----------------|---------|--------|---------|----------|-----------|--------|--------|--------|--------|----------|--------|
| Total lipids in large HDL                                | 27005778 | metabolites    | 0.0614  | 0.1413 | 0.4346  | 6.64E-01 | European  | 0.1292 | 0.0309 | 1.0013 | 0.0153 | -0.0023  | 0.0047 |
| Omega-3 fatty acids                                      | 27005778 | metabolites    | -0.0658 | 0.1520 | -0.4328 | 6.65E-01 | European  | 0.1493 | 0.0431 | 0.9925 | 0.0079 | 0.0010   | 0.0047 |
| Triglycerides in chylomicrons and largest VLDL particles | 27005778 | metabolites    | 0.0592  | 0.1386 | 0.4273  | 6.69E-01 | European  | 0.0928 | 0.0275 | 0.9900 | 0.0069 | 0.0022   | 0.0046 |
| Celiac disease                                           | 20190752 | autoimmune     | 0.0580  | 0.1440 | 0.4025  | 6.87E-01 | European  | 0.3024 | 0.0496 | 1.0674 | 0.0111 | -0.0026  | 0.0071 |
| Ferritin                                                 | 25352340 | metal          | 0.0691  | 0.1738 | 0.3974  | 6.91E-01 | European  | 0.0908 | 0.0270 | 1.0279 | 0.0093 | 0.0010   | 0.0063 |
| LDL cholesterol                                          | 20686565 | lipids         | 0.0318  | 0.0817 | 0.3897  | 6.97E-01 | European  | 0.1032 | 0.0290 | 1.0526 | 0.0496 | 0.0054   | 0.0055 |
| Child birth length                                       | 25281659 | anthropometric | 0.0502  | 0.1309 | 0.3832  | 7.02E-01 | European  | 0.1676 | 0.0234 | 0.9936 | 0.0073 | -0.0051  | 0.0058 |
| Phospholipids in IDL                                     | 27005778 | metabolites    | 0.0719  | 0.1897 | 0.3789  | 7.05E-01 | European  | 0.0603 | 0.0429 | 1.0211 | 0.0201 | 0.0039   | 0.0045 |
| Triglycerides in very large HDL                          | 27005778 | metabolites    | 0.0647  | 0.1735 | 0.3730  | 7.09E-01 | European  | 0.0829 | 0.0257 | 1.0153 | 0.0284 | 0.0068   | 0.0050 |
| Primary sclerosing cholangitis                           | 27992413 | autoimmune     | -0.0451 | 0.1208 | -0.3729 | 7.09E-01 | Mixed     | 0.3933 | 0.1568 | 0.9942 | 0.0159 | 0.0043   | 0.0060 |
| Serum cystatin c                                         | 26831199 | kidney         | -0.0379 | 0.1022 | -0.3704 | 7.11E-01 | Mixed     | 0.1687 | 0.0676 | 0.9622 | 0.0143 | 0.0012   | 0.0050 |
| Total lipids in small VLDL                               | 27005778 | metabolites    | -0.0485 | 0.1311 | -0.3700 | 7.11E-01 | European  | 0.1406 | 0.0374 | 0.9931 | 0.0083 | 0.0056   | 0.0046 |
| Alanine                                                  | 27005778 | metabolites    | 0.0575  | 0.1603 | 0.3585  | 7.20E-01 | European  | 0.0939 | 0.0273 | 1.0076 | 0.0075 | -0.0071  | 0.0051 |
| Phospholipids in very large VLDL                         | 27005778 | metabolites    | 0.0449  | 0.1258 | 0.3568  | 7.21E-01 | European  | 0.1080 | 0.0288 | 0.9850 | 0.0068 | 0.0015   | 0.0045 |
| Total lipids in medium VLDL                              | 27005778 | metabolites    | 0.0444  | 0.1255 | 0.3536  | 7.24E-01 | European  | 0.1367 | 0.0353 | 0.9870 | 0.0070 | 0.0039   | 0.0046 |
| Platelet count                                           | 22139419 | haematological | -0.0291 | 0.0845 | -0.3450 | 7.30E-01 | European  | 0.1195 | 0.0118 | 0.9860 | 0.0087 | 0.0091   | 0.0046 |
| Triglycerides                                            | 20686565 | lipids         | 0.0298  | 0.0894 | 0.3329  | 7.39E-01 | European  | 0.1690 | 0.0294 | 0.9674 | 0.0167 | 0.0084   | 0.0061 |
| Phospholipids in large LDL                               | 27005778 | metabolites    | 0.0583  | 0.1856 | 0.3138  | 7.54E-01 | European  | 0.0605 | 0.0465 | 1.0181 | 0.0222 | 0.0053   | 0.0046 |
| Triglycerides in medium VLDL                             | 27005778 | metabolites    | 0.0435  | 0.1393 | 0.3120  | 7.55E-01 | European  | 0.0937 | 0.0311 | 1.0002 | 0.0066 | 0.0053   | 0.0047 |
| Concentration of small VLDL particles                    | 27005778 | metabolites    | -0.0366 | 0.1259 | -0.2906 | 7.71E-01 | European  | 0.1470 | 0.0380 | 0.9912 | 0.0081 | 0.0059   | 0.0045 |
| Phospholipids in very small VLDL                         | 27005778 | metabolites    | 0.0507  | 0.1755 | 0.2892  | 7.72E-01 | European  | 0.0864 | 0.0387 | 1.0139 | 0.0158 | 0.0026   | 0.0048 |
| Free cholesterol in large VLDL                           | 27005778 | metabolites    | -0.0312 | 0.1154 | -0.2703 | 7.87E-01 | European  | 0.1249 | 0.0308 | 0.9879 | 0.0070 | 0.0041   | 0.0043 |
| Serum creatinine (non-diabetes)                          | 26831199 | kidney         | 0.0238  | 0.0892 | 0.2664  | 7.90E-01 | Mixed     | 0.1140 | 0.0109 | 0.9810 | 0.0143 | 0.0004   | 0.0058 |

| Trait                                                       | PMID     | Category       | rg      | SE     | z       | p        | ethnicity | h2_obs | se     | h2_int | se     | gcov_int | se     |
|-------------------------------------------------------------|----------|----------------|---------|--------|---------|----------|-----------|--------|--------|--------|--------|----------|--------|
| Triglycerides in very small VLDL                            | 27005778 | metabolites    | -0.0351 | 0.1361 | -0.2582 | 7.96E-01 | European  | 0.1370 | 0.0378 | 0.9987 | 0.0101 | 0.0067   | 0.0046 |
| Total cholesterol in medium VLDL                            | 27005778 | metabolites    | -0.0311 | 0.1221 | -0.2550 | 7.99E-01 | European  | 0.1210 | 0.0362 | 0.9938 | 0.0078 | 0.0063   | 0.0045 |
| Triglycerides in IDL                                        | 27005778 | metabolites    | -0.0403 | 0.1589 | -0.2536 | 8.00E-01 | European  | 0.1064 | 0.0361 | 1.0107 | 0.0156 | 0.0063   | 0.0046 |
| HOMA-B                                                      | 20081858 | glycemic       | -0.0357 | 0.1516 | -0.2357 | 8.14E-01 | European  | 0.0895 | 0.0136 | 0.9896 | 0.0064 | 0.0039   | 0.0050 |
| Height; Females at age 10 and males at age 12               | 23449627 | anthropometric | -0.0232 | 0.0986 | -0.2353 | 8.14E-01 | European  | 0.4289 | 0.0485 | 0.9532 | 0.0080 | -0.0040  | 0.0054 |
| Difference in height between childhood and adulthood; age 8 | 23449627 | anthropometric | 0.0319  | 0.1374 | 0.2325  | 8.16E-01 | European  | 0.3391 | 0.0506 | 0.9709 | 0.0078 | -0.0057  | 0.0055 |
| Phospholipids in medium LDL                                 | 27005778 | metabolites    | 0.0386  | 0.1762 | 0.2189  | 8.27E-01 | European  | 0.0721 | 0.0442 | 1.0086 | 0.0200 | 0.0053   | 0.0047 |
| Forced expiratory volume in 1 second (FEV1)                 | 21946350 | lung function  | -0.0271 | 0.1245 | -0.2180 | 8.27E-01 | European  | 0.1737 | 0.0229 | 0.8800 | 0.0121 | -0.0094  | 0.0081 |
| Triglycerides in small HDL                                  | 27005778 | metabolites    | 0.0400  | 0.1893 | 0.2114  | 8.33E-01 | European  | 0.0633 | 0.0274 | 1.0003 | 0.0083 | 0.0044   | 0.0045 |
| Triglycerides in very large VLDL                            | 27005778 | metabolites    | 0.0237  | 0.1152 | 0.2055  | 8.37E-01 | European  | 0.1228 | 0.0298 | 0.9796 | 0.0070 | 0.0014   | 0.0043 |
| Triglycerides in small VLDL                                 | 27005778 | metabolites    | -0.0260 | 0.1298 | -0.2002 | 8.41E-01 | European  | 0.1184 | 0.0360 | 0.9947 | 0.0076 | 0.0067   | 0.0044 |
| Mean diameter for HDL particles                             | 27005778 | metabolites    | -0.0309 | 0.1573 | -0.1963 | 8.44E-01 | European  | 0.1164 | 0.0294 | 1.0098 | 0.0197 | 0.0010   | 0.0048 |
| Total lipids in very small VLDL                             | 27005778 | metabolites    | -0.0295 | 0.1545 | -0.1909 | 8.49E-01 | European  | 0.1075 | 0.0374 | 1.0091 | 0.0131 | 0.0049   | 0.0047 |
| Fasting proinsulin                                          | 20081858 | glycemic       | 0.0289  | 0.1513 | 0.1908  | 8.49E-01 | European  | 0.1956 | 0.0890 | 0.9794 | 0.0098 | 0.0048   | 0.0044 |
| Leptin_adjBMI                                               | 26833098 | hormone        | -0.0269 | 0.1490 | -0.1803 | 8.57E-01 | European  | 0.0953 | 0.0173 | 1.0032 | 0.0071 | 0.0031   | 0.0050 |
| Serum total triglycerides                                   | 27005778 | metabolites    | -0.0215 | 0.1202 | -0.1785 | 8.58E-01 | European  | 0.1235 | 0.0369 | 0.9927 | 0.0078 | 0.0065   | 0.0045 |
| Birth weight                                                | 27680694 | anthropometric | -0.0132 | 0.0765 | -0.1722 | 8.63E-01 | European  | 0.1016 | 0.0067 | 1.0439 | 0.0099 | -0.0037  | 0.0054 |
| Glutamine                                                   | 27005778 | metabolites    | -0.0277 | 0.1674 | -0.1655 | 8.69E-01 | European  | 0.0643 | 0.0217 | 1.0175 | 0.0076 | -0.0017  | 0.0042 |
| Attention deficit hyperactivity disorder                    | 20732625 | psychiatric    | -0.0363 | 0.2307 | -0.1575 | 8.75E-01 | European  | 0.2392 | 0.0884 | 1.0072 | 0.0062 | 0.0034   | 0.0048 |
| Urinary albumin-to-creatinine ratio                         | 26631737 | kidney         | -0.0235 | 0.1504 | -0.1559 | 8.76E-01 | European  | 0.0458 | 0.0088 | 0.9963 | 0.0071 | 0.0034   | 0.0051 |
| Concentration of IDL particles                              | 27005778 | metabolites    | 0.0285  | 0.1834 | 0.1552  | 8.77E-01 | European  | 0.0749 | 0.0449 | 1.0180 | 0.0190 | 0.0041   | 0.0047 |



| Trait                                            | PMID     | Category          | rg      | SE     | z       | p        | ethnicity | h2_obs | se     | h2_int | se     | gcov_int | se     |
|--------------------------------------------------|----------|-------------------|---------|--------|---------|----------|-----------|--------|--------|--------|--------|----------|--------|
| Cholesterol esters in medium LDL                 | 27005778 | metabolites       | -0.0283 | 0.1851 | -0.1526 | 8.79E-01 | European  | 0.0777 | 0.0513 | 1.0109 | 0.0215 | 0.0057   | 0.0048 |
| Cholesterol esters in large LDL                  | 27005778 | metabolites       | -0.0284 | 0.1878 | -0.1514 | 8.80E-01 | European  | 0.0741 | 0.0530 | 1.0129 | 0.0227 | 0.0051   | 0.0047 |
| Phospholipids in medium VLDL                     | 27005778 | metabolites       | -0.0196 | 0.1293 | -0.1512 | 8.80E-01 | European  | 0.1070 | 0.0343 | 0.9983 | 0.0071 | 0.0066   | 0.0045 |
| Total cholesterol in large HDL                   | 27005778 | metabolites       | -0.0232 | 0.1560 | -0.1490 | 8.82E-01 | European  | 0.1039 | 0.0282 | 1.0072 | 0.0148 | -0.0004  | 0.0047 |
| Leptin_not_adjBM I                               | 26833098 | hormone           | 0.0205  | 0.1463 | 0.1399  | 8.89E-01 | European  | 0.0977 | 0.0159 | 0.9953 | 0.0068 | 0.0064   | 0.0051 |
| Cholesterol esters in large HDL                  | 27005778 | metabolites       | 0.0202  | 0.1504 | 0.1346  | 8.93E-01 | European  | 0.1210 | 0.0308 | 1.0019 | 0.0145 | -0.0015  | 0.0048 |
| Free cholesterol in medium VLDL                  | 27005778 | metabolites       | -0.0161 | 0.1211 | -0.1327 | 8.94E-01 | European  | 0.1091 | 0.0344 | 0.9965 | 0.0072 | 0.0054   | 0.0044 |
| Cholesterol esters in medium VLDL                | 27005778 | metabolites       | -0.0161 | 0.1252 | -0.1286 | 8.98E-01 | European  | 0.1482 | 0.0383 | 0.9873 | 0.0081 | 0.0048   | 0.0046 |
| Fasting glucose main effect                      | 22581228 | glycemic          | 0.0132  | 0.1103 | 0.1195  | 9.05E-01 | European  | 0.0985 | 0.0192 | 0.9982 | 0.0102 | 0.0035   | 0.0051 |
| Acetoacetate                                     | 27005778 | metabolites       | 0.0229  | 0.1920 | 0.1192  | 9.05E-01 | European  | 0.0775 | 0.0281 | 0.9784 | 0.0071 | 0.0026   | 0.0050 |
| Obesity class 3                                  | 23563607 | anthropometric    | -0.0130 | 0.1167 | -0.1110 | 9.12E-01 | European  | 0.1225 | 0.0138 | 0.9792 | 0.0093 | 0.0093   | 0.0062 |
| Chronotype                                       | 27494321 | sleeping          | -0.0086 | 0.0822 | -0.1047 | 9.17E-01 | European  | 0.0995 | 0.0058 | 1.0186 | 0.0081 | -0.0003  | 0.0052 |
| Serum total cholesterol                          | 27005778 | metabolites       | -0.0190 | 0.1846 | -0.1027 | 9.18E-01 | European  | 0.0622 | 0.0396 | 1.0229 | 0.0159 | 0.0057   | 0.0046 |
| Age of smoking initiation                        | 20418890 | smoking behaviour | -0.0184 | 0.1985 | -0.0927 | 9.26E-01 | European  | 0.0640 | 0.0187 | 0.9983 | 0.0061 | -0.0040  | 0.0048 |
| Free cholesterol in large HDL                    | 27005778 | metabolites       | -0.0137 | 0.1507 | -0.0907 | 9.28E-01 | European  | 0.1053 | 0.0284 | 1.0088 | 0.0146 | -0.0009  | 0.0046 |
| Total cholesterol in IDL                         | 27005778 | metabolites       | -0.0160 | 0.1895 | -0.0844 | 9.33E-01 | European  | 0.0712 | 0.0479 | 1.0184 | 0.0209 | 0.0043   | 0.0047 |
| Child birth weight                               | 23202124 | anthropometric    | -0.0100 | 0.1210 | -0.0828 | 9.34E-01 | European  | 0.1158 | 0.0177 | 1.0027 | 0.0060 | -0.0050  | 0.0047 |
| Apolipoprotein A-I                               | 27005778 | metabolites       | 0.0151  | 0.1939 | 0.0778  | 9.38E-01 | European  | 0.0798 | 0.0314 | 1.0030 | 0.0119 | 0.0058   | 0.0047 |
| Serum creatinine                                 | 26831199 | kidney            | 0.0065  | 0.0859 | 0.0758  | 9.40E-01 | Mixed     | 0.1066 | 0.0096 | 0.9782 | 0.0142 | 0.0041   | 0.0058 |
| Total cholesterol in large LDL                   | 27005778 | metabolites       | -0.0133 | 0.1856 | -0.0718 | 9.43E-01 | European  | 0.0634 | 0.0487 | 1.0156 | 0.0236 | 0.0061   | 0.0046 |
| Free cholesterol in large LDL                    | 27005778 | metabolites       | -0.0134 | 0.1876 | -0.0712 | 9.43E-01 | European  | 0.0628 | 0.0505 | 1.0174 | 0.0247 | 0.0060   | 0.0046 |
| Free cholesterol to esterified cholesterol ratio | 27005778 | metabolites       | 0.0164  | 0.2444 | 0.0672  | 9.47E-01 | European  | 0.0621 | 0.0523 | 1.0120 | 0.0130 | 0.0010   | 0.0046 |
| Total cholesterol in HDL                         | 27005778 | metabolites       | -0.0105 | 0.1567 | -0.0670 | 9.47E-01 | European  | 0.0949 | 0.0291 | 1.0062 | 0.0127 | 0.0015   | 0.0046 |

| Trait                                              | PMID     | Category       | rg      | SE     | z       | p        | ethnicity | h2_obs | se     | h2_int | se     | gcov_int | se     |
|----------------------------------------------------|----------|----------------|---------|--------|---------|----------|-----------|--------|--------|--------|--------|----------|--------|
| Total cholesterol in LDL                           | 27005778 | metabolites    | -0.0120 | 0.1874 | -0.0640 | 9.49E-01 | European  | 0.0670 | 0.0526 | 1.0143 | 0.0248 | 0.0058   | 0.0047 |
| Total lipids in IDL                                | 27005778 | metabolites    | 0.0103  | 0.1856 | 0.0557  | 9.56E-01 | European  | 0.0735 | 0.0464 | 1.0188 | 0.0199 | 0.0041   | 0.0047 |
| Total lipids in small LDL                          | 27005778 | metabolites    | 0.0091  | 0.1703 | 0.0532  | 9.58E-01 | European  | 0.0834 | 0.0469 | 1.0091 | 0.0182 | 0.0062   | 0.0047 |
| Free cholesterol in IDL                            | 27005778 | metabolites    | 0.0087  | 0.1802 | 0.0485  | 9.61E-01 | European  | 0.0720 | 0.0431 | 1.0194 | 0.0209 | 0.0041   | 0.0045 |
| Hip circumference                                  | 25673412 | anthropometric | -0.0027 | 0.0627 | -0.0424 | 9.66E-01 | European  | 0.1275 | 0.0056 | 0.8604 | 0.0082 | 0.0066   | 0.0054 |
| Concentration of very small VLDL particles         | 27005778 | metabolites    | -0.0061 | 0.1481 | -0.0415 | 9.67E-01 | European  | 0.1164 | 0.0374 | 1.0048 | 0.0127 | 0.0050   | 0.0046 |
| Total Cholesterol                                  | 20686565 | lipids         | 0.0030  | 0.0761 | 0.0388  | 9.69E-01 | European  | 0.1335 | 0.0245 | 1.0221 | 0.0358 | 0.0056   | 0.0058 |
| Serumurate overweight                              | 25811787 | uric_acid      | -0.0037 | 0.0995 | -0.0377 | 9.70E-01 | European  | 0.5259 | 0.2915 | 0.9692 | 0.0260 | 0.0035   | 0.0045 |
| Total lipids in large LDL                          | 27005778 | metabolites    | -0.0067 | 0.1876 | -0.0359 | 9.71E-01 | European  | 0.0728 | 0.0537 | 1.0152 | 0.0230 | 0.0047   | 0.0047 |
| Concentration of small LDL particles               | 27005778 | metabolites    | -0.0043 | 0.1642 | -0.0261 | 9.79E-01 | European  | 0.0916 | 0.0445 | 1.0078 | 0.0164 | 0.0067   | 0.0047 |
| Total lipids in medium LDL                         | 27005778 | metabolites    | 0.0025  | 0.1808 | 0.0139  | 9.89E-01 | European  | 0.0785 | 0.0515 | 1.0108 | 0.0215 | 0.0053   | 0.0048 |
| Concentration of medium LDL particles              | 27005778 | metabolites    | 0.0024  | 0.1815 | 0.0132  | 9.90E-01 | European  | 0.0774 | 0.0505 | 1.0123 | 0.0208 | 0.0055   | 0.0047 |
| Mean diameter for LDL particles                    | 27005778 | metabolites    | -0.0026 | 0.2220 | -0.0119 | 9.91E-01 | European  | 0.0573 | 0.0270 | 0.9964 | 0.0123 | -0.0039  | 0.0044 |
| Concentration of large LDL particles               | 27005778 | metabolites    | -0.0019 | 0.1869 | -0.0101 | 9.92E-01 | European  | 0.0733 | 0.0524 | 1.0165 | 0.0224 | 0.0048   | 0.0047 |
| Total cholesterol in medium LDL                    | 27005778 | metabolites    | -0.0014 | 0.1856 | -0.0074 | 9.94E-01 | European  | 0.0678 | 0.0487 | 1.0133 | 0.0230 | 0.0057   | 0.0048 |
| Urinary albumin-to-creatinine ratio (non-diabetes) | 26631737 | kidney         | 0.0000  | 0.1543 | 0.0001  | 1.00E+00 | European  | 0.0533 | 0.0104 | 0.9951 | 0.0072 | 0.0032   | 0.0047 |

**eTable 9.** Genetic correlations for “covariate” Design (UKBB traits)

All results from LDhub analyses. Trait= trait against which genetic correlation was calculated. ethnicity= sample ethnicity for sample referenced in “Trait” column. rG= genetic correlation. SE= standard error for genetic correlation. z= Z-score. p= P-value for genetic correlation analysis. h2\_obs= Heritability on the observed scale for sample referenced in “Trait”. se= standard errors for variable reported in the cell to the left (i.e. h2\_obs, ht\_int, gcov\_int). h2\_int= LD score intercept for sample referenced in “Trait”. gcov\_int= cross-trait LD Score regression intercept.

| Trait                                                                               | ethnicity | rg      | SE     | z       | p        | h2_obs | se     | h2_int | se     | gcov_int | se     |
|-------------------------------------------------------------------------------------|-----------|---------|--------|---------|----------|--------|--------|--------|--------|----------|--------|
| Pack years adult smoking as proportion of life span exposed to smoking PREVIEW ONLY | European  | 0.4604  | 0.0744 | 6.1907  | 5.99E-10 | 0.1280 | 0.0110 | 1.0135 | 0.0097 | -0.0113  | 0.0050 |
| Pack years of smoking PREVIEW ONLY                                                  | European  | 0.4736  | 0.0787 | 6.0183  | 1.76E-09 | 0.1105 | 0.0098 | 1.0140 | 0.0093 | -0.0122  | 0.0048 |
| Overall health rating                                                               | European  | 0.3931  | 0.0670 | 5.8637  | 4.53E-09 | 0.0992 | 0.0031 | 1.0652 | 0.0110 | -0.0037  | 0.0063 |
| Age at first live birth                                                             | European  | -0.4495 | 0.0773 | -5.8169 | 6.00E-09 | 0.1655 | 0.0078 | 1.0488 | 0.0093 | -0.0020  | 0.0057 |
| Seen doctor (GP) for nerves anxiety tension or depression                           | European  | 0.4506  | 0.0801 | 5.6246  | 1.86E-08 | 0.0612 | 0.0030 | 1.0151 | 0.0095 | 0.0059   | 0.0059 |
| Illness injury bereavement stress in last 2 years: Financial difficulties           | European  | 0.4933  | 0.0884 | 5.5830  | 2.36E-08 | 0.0329 | 0.0022 | 1.0306 | 0.0082 | -0.0108  | 0.0050 |
| Age completed full time education                                                   | European  | -0.3813 | 0.0699 | -5.4582 | 4.81E-08 | 0.0843 | 0.0046 | 1.0636 | 0.0100 | 0.0072   | 0.0056 |
| Seen a psychiatrist for nerves anxiety tension or depression                        | European  | 0.5066  | 0.0935 | 5.4161  | 6.09E-08 | 0.0308 | 0.0022 | 1.0072 | 0.0085 | 0.0003   | 0.0051 |
| Smoking status: Current                                                             | European  | 0.4093  | 0.0759 | 5.3941  | 6.89E-08 | 0.0519 | 0.0028 | 1.0139 | 0.0094 | -0.0077  | 0.0052 |
| Current tobacco smoking                                                             | European  | 0.3941  | 0.0752 | 5.2384  | 1.62E-07 | 0.0553 | 0.0028 | 1.0128 | 0.0097 | -0.0059  | 0.0055 |
| Pain type(s) experienced in last month: None of the above                           | European  | -0.3359 | 0.0647 | -5.1918 | 2.08E-07 | 0.0549 | 0.0027 | 1.0388 | 0.0088 | -0.0060  | 0.0052 |
| Frequency of tenseness / restlessness in last 2 weeks                               | European  | 0.4265  | 0.0848 | 5.0271  | 4.98E-07 | 0.0436 | 0.0026 | 1.0157 | 0.0093 | 0.0023   | 0.0053 |
| Frequency of tiredness / lethargy in last 2 weeks                                   | European  | 0.3683  | 0.0734 | 5.0193  | 5.19E-07 | 0.0591 | 0.0029 | 1.0300 | 0.0093 | 0.0003   | 0.0056 |
| Past tobacco smoking                                                                | European  | -0.3312 | 0.0663 | -4.9964 | 5.84E-07 | 0.0901 | 0.0041 | 1.0273 | 0.0106 | 0.0085   | 0.0059 |
| Ever smoked                                                                         | European  | 0.3315  | 0.0671 | 4.9396  | 7.83E-07 | 0.0743 | 0.0035 | 1.0273 | 0.0104 | -0.0163  | 0.0058 |
| Illness injury bereavement stress in last 2 years: None of the above                | European  | -0.4576 | 0.0929 | -4.9278 | 8.32E-07 | 0.0233 | 0.0017 | 1.0108 | 0.0067 | 0.0040   | 0.0050 |
| Age at last live birth                                                              | European  | -0.4358 | 0.0894 | -4.8752 | 1.09E-06 | 0.0874 | 0.0059 | 1.0194 | 0.0087 | -0.0017  | 0.0052 |
| Chest pain or discomfort                                                            | European  | 0.3944  | 0.0835 | 4.7234  | 2.32E-06 | 0.0328 | 0.0022 | 1.0191 | 0.0078 | 0.0003   | 0.0052 |
| Long-standing illness disability or infirmity                                       | European  | 0.3074  | 0.0658 | 4.6743  | 2.95E-06 | 0.0496 | 0.0024 | 1.0291 | 0.0088 | 0.0036   | 0.0051 |
| Usual walking pace                                                                  | European  | -0.2989 | 0.0663 | -4.5090 | 6.51E-06 | 0.0769 | 0.0031 | 1.0347 | 0.0105 | 0.0082   | 0.0062 |
| Medication for pain relief constipation heartburn: None of the above                | European  | -0.3116 | 0.0696 | -4.4759 | 7.61E-06 | 0.0538 | 0.0026 | 1.0326 | 0.0093 | -0.0032  | 0.0052 |
| Diagnoses - main ICD10: R07 Pain in throat and chest                                | European  | 0.4823  | 0.1080 | 4.4638  | 8.05E-06 | 0.0164 | 0.0018 | 1.0047 | 0.0076 | 0.0000   | 0.0047 |
| Health satisfaction                                                                 | European  | 0.4166  | 0.0934 | 4.4618  | 8.13E-06 | 0.0813 | 0.0054 | 1.0098 | 0.0077 | -0.0028  | 0.0054 |
| Loneliness isolation                                                                | European  | 0.3951  | 0.0886 | 4.4576  | 8.29E-06 | 0.0376 | 0.0022 | 1.0247 | 0.0080 | -0.0066  | 0.0057 |

| Trait                                                                                                          | ethnicity | rg      | SE     | z       | p        | h2_obs | se     | h2_int | se     | gcov_int | se     |
|----------------------------------------------------------------------------------------------------------------|-----------|---------|--------|---------|----------|--------|--------|--------|--------|----------|--------|
| Taking other prescription medications                                                                          | European  | 0.3293  | 0.0739 | 4.4561  | 8.34E-06 | 0.0428 | 0.0024 | 1.0193 | 0.0088 | 0.0059   | 0.0054 |
| Medication for pain relief constipation heartburn: Omeprazole (e.g. Zanol)                                     | European  | 0.4400  | 0.1000 | 4.4009  | 1.08E-05 | 0.0181 | 0.0017 | 1.0197 | 0.0073 | -0.0029  | 0.0049 |
| Current employment status: Unable to work because of sickness or disability                                    | European  | 0.4803  | 0.1098 | 4.3733  | 1.22E-05 | 0.0241 | 0.0019 | 1.0206 | 0.0075 | -0.0050  | 0.0057 |
| Number of treatments/medications taken                                                                         | European  | 0.3036  | 0.0698 | 4.3484  | 1.37E-05 | 0.0602 | 0.0026 | 1.0342 | 0.0095 | 0.0043   | 0.0054 |
| Shortness of breath walking on level ground                                                                    | European  | 0.4851  | 0.1125 | 4.3128  | 1.61E-05 | 0.0488 | 0.0052 | 1.0087 | 0.0068 | -0.0053  | 0.0050 |
| Qualifications: None of the above                                                                              | European  | 0.2656  | 0.0621 | 4.2807  | 1.86E-05 | 0.0970 | 0.0039 | 1.0698 | 0.0120 | -0.0002  | 0.0065 |
| Number of operations self-reported                                                                             | European  | 0.3558  | 0.0832 | 4.2776  | 1.89E-05 | 0.0379 | 0.0022 | 1.0393 | 0.0077 | -0.0054  | 0.0059 |
| Pain type(s) experienced in last month: Neck or shoulder pain                                                  | European  | 0.3243  | 0.0770 | 4.2090  | 2.56E-05 | 0.0327 | 0.0020 | 1.0267 | 0.0078 | 0.0025   | 0.0045 |
| Number of self-reported non-cancer illnesses                                                                   | European  | 0.2675  | 0.0637 | 4.2004  | 2.66E-05 | 0.0607 | 0.0026 | 1.0301 | 0.0106 | 0.0048   | 0.0053 |
| Age started oral contraceptive pill                                                                            | European  | -0.4285 | 0.1034 | -4.1445 | 3.41E-05 | 0.0482 | 0.0043 | 1.0164 | 0.0077 | 0.0030   | 0.0051 |
| Medication for cholesterol blood pressure diabetes or take exogenous hormones: Cholesterol lowering medication | European  | 0.3874  | 0.0939 | 4.1238  | 3.73E-05 | 0.0511 | 0.0058 | 1.0240 | 0.0146 | -0.0109  | 0.0050 |
| Difficulty not smoking for 1 day                                                                               | European  | 0.6735  | 0.1649 | 4.0841  | 4.42E-05 | 0.1124 | 0.0222 | 0.9886 | 0.0067 | -0.0145  | 0.0056 |
| Townsend deprivation index at recruitment                                                                      | European  | 0.3604  | 0.0894 | 4.0330  | 5.51E-05 | 0.0331 | 0.0020 | 1.0389 | 0.0077 | -0.0003  | 0.0056 |
| Qualifications: College or University degree                                                                   | European  | -0.2336 | 0.0581 | -4.0209 | 5.80E-05 | 0.1680 | 0.0055 | 1.1191 | 0.0143 | -0.0076  | 0.0071 |
| Forced vital capacity (FVC) Best measure                                                                       | European  | -0.2311 | 0.0576 | -4.0145 | 5.96E-05 | 0.1889 | 0.0086 | 1.0817 | 0.0180 | 0.0105   | 0.0057 |
| Forced expiratory volume in 1-second (FEV1) Best measure                                                       | European  | -0.2451 | 0.0612 | -4.0081 | 6.12E-05 | 0.1626 | 0.0073 | 1.0584 | 0.0145 | 0.0109   | 0.0056 |
| Frequency of depressed mood in last 2 weeks                                                                    | European  | 0.3945  | 0.0999 | 3.9483  | 7.87E-05 | 0.0421 | 0.0028 | 1.0133 | 0.0088 | -0.0017  | 0.0058 |
| Qualifications: NVQ or HND or HNC or equivalent                                                                | European  | 0.4618  | 0.1173 | 3.9356  | 8.30E-05 | 0.0146 | 0.0017 | 1.0136 | 0.0068 | -0.0065  | 0.0056 |
| Frequency of unenthusiasm / disinterest in last 2 weeks                                                        | European  | 0.3512  | 0.0896 | 3.9190  | 8.89E-05 | 0.0390 | 0.0027 | 1.0168 | 0.0093 | 0.0006   | 0.0055 |
| Alcohol usually taken with meals                                                                               | European  | -0.2950 | 0.0773 | -3.8163 | 1.00E-04 | 0.1101 | 0.0052 | 1.0596 | 0.0094 | 0.0035   | 0.0060 |
| Other serious medical condition/disability diagnosed by doctor                                                 | European  | 0.3899  | 0.1015 | 3.8401  | 1.00E-04 | 0.0254 | 0.0018 | 1.0110 | 0.0074 | -0.0045  | 0.0054 |
| Ever unenthusiastic/disinterested for a whole week                                                             | European  | 0.4040  | 0.1052 | 3.8400  | 1.00E-04 | 0.0574 | 0.0063 | 1.0007 | 0.0076 | 0.0037   | 0.0052 |
| Mouth/teeth dental problems: Dentures                                                                          | European  | 0.3222  | 0.0848 | 3.8007  | 1.00E-04 | 0.0487 | 0.0029 | 1.0329 | 0.0098 | -0.0046  | 0.0058 |
| Vascular/heart problems diagnosed by doctor: Angina                                                            | European  | 0.3536  | 0.0921 | 3.8405  | 1.00E-04 | 0.0217 | 0.0021 | 1.0283 | 0.0080 | -0.0035  | 0.0048 |
| Medication for cholesterol blood pressure diabetes or take exogenous hormones: None of the above               | European  | -0.3387 | 0.0886 | -3.8227 | 1.00E-04 | 0.0662 | 0.0045 | 1.0177 | 0.0089 | 0.0114   | 0.0053 |
| Falls in the last year                                                                                         | European  | 0.3243  | 0.0857 | 3.7839  | 2.00E-04 | 0.0326 | 0.0022 | 1.0041 | 0.0082 | -0.0075  | 0.0051 |
| Forced expiratory volume in 1-second (FEV1)                                                                    | European  | -0.2331 | 0.0620 | -3.7570 | 2.00E-04 | 0.1477 | 0.0064 | 1.0658 | 0.0150 | 0.0117   | 0.0059 |
| Time from waking to first cigarette                                                                            | European  | -0.6877 | 0.1831 | -3.7565 | 2.00E-04 | 0.0881 | 0.0254 | 1.0145 | 0.0078 | 0.0108   | 0.0047 |
| Non-cancer illness code self-reported: angina                                                                  | European  | 0.3457  | 0.0934 | 3.7022  | 2.00E-04 | 0.0222 | 0.0021 | 1.0252 | 0.0080 | -0.0037  | 0.0049 |
| Alcohol drinker status: Previous                                                                               | European  | 0.4840  | 0.1308 | 3.7000  | 2.00E-04 | 0.0132 | 0.0015 | 1.0071 | 0.0068 | -0.0061  | 0.0049 |
| Standing height                                                                                                | European  | -0.1756 | 0.0485 | -3.6223 | 3.00E-04 | 0.4511 | 0.0223 | 1.2528 | 0.0562 | 0.0103   | 0.0084 |

| Trait                                                                                                                                        | ethnicity | rg      | SE     | z       | p        | h2_obs | se     | h2_int | se     | gcov_int | se     |
|----------------------------------------------------------------------------------------------------------------------------------------------|-----------|---------|--------|---------|----------|--------|--------|--------|--------|----------|--------|
| Maternal smoking around birth                                                                                                                | European  | 0.2646  | 0.0740 | 3.5753  | 3.00E-04 | 0.0498 | 0.0028 | 1.0360 | 0.0089 | 0.0063   | 0.0048 |
| Mood swings                                                                                                                                  | European  | 0.2913  | 0.0807 | 3.6105  | 3.00E-04 | 0.0708 | 0.0034 | 1.0190 | 0.0104 | 0.0054   | 0.0056 |
| Tense / highly strung                                                                                                                        | European  | 0.3741  | 0.1040 | 3.5988  | 3.00E-04 | 0.0571 | 0.0033 | 0.9968 | 0.0104 | 0.0007   | 0.0062 |
| Diabetes diagnosed by doctor                                                                                                                 | European  | 0.2757  | 0.0754 | 3.6586  | 3.00E-04 | 0.0438 | 0.0027 | 1.0401 | 0.0107 | -0.0071  | 0.0053 |
| Mothers age at death                                                                                                                         | European  | -0.4228 | 0.1167 | -3.6235 | 3.00E-04 | 0.0247 | 0.0030 | 1.0268 | 0.0075 | 0.0011   | 0.0054 |
| Illnesses of siblings: None of the above (group 1)                                                                                           | European  | -0.3054 | 0.0853 | -3.5803 | 3.00E-04 | 0.0364 | 0.0026 | 1.0134 | 0.0076 | -0.0001  | 0.0053 |
| Smoking status: Previous                                                                                                                     | European  | 0.2516  | 0.0696 | 3.6157  | 3.00E-04 | 0.0512 | 0.0030 | 1.0251 | 0.0100 | -0.0004  | 0.0050 |
| Qualifications: A levels/AS levels or equivalent                                                                                             | European  | -0.2245 | 0.0621 | -3.6166 | 3.00E-04 | 0.0964 | 0.0036 | 1.0551 | 0.0115 | -0.0056  | 0.0063 |
| Leg pain on walking                                                                                                                          | European  | 0.4002  | 0.1128 | 3.5495  | 4.00E-04 | 0.0566 | 0.0052 | 1.0105 | 0.0072 | -0.0014  | 0.0052 |
| Mouth/teeth dental problems: None of the above                                                                                               | European  | -0.2993 | 0.0846 | -3.5375 | 4.00E-04 | 0.0378 | 0.0021 | 1.0170 | 0.0083 | 0.0030   | 0.0056 |
| Medication for pain relief constipation heartburn: Paracetamol                                                                               | European  | 0.2924  | 0.0824 | 3.5473  | 4.00E-04 | 0.0426 | 0.0024 | 1.0298 | 0.0088 | -0.0003  | 0.0051 |
| Pain type(s) experienced in last month: Headache                                                                                             | European  | 0.3081  | 0.0872 | 3.5351  | 4.00E-04 | 0.0444 | 0.0027 | 1.0077 | 0.0092 | 0.0002   | 0.0055 |
| Forced vital capacity (FVC)                                                                                                                  | European  | -0.2011 | 0.0582 | -3.4567 | 5.00E-04 | 0.1707 | 0.0076 | 1.0936 | 0.0186 | 0.0105   | 0.0059 |
| Peak expiratory flow (PEF)                                                                                                                   | European  | -0.2683 | 0.0767 | -3.4999 | 5.00E-04 | 0.0896 | 0.0046 | 1.0581 | 0.0127 | 0.0184   | 0.0069 |
| Ever highly irritable/argumentative for 2 days                                                                                               | European  | 0.3756  | 0.1086 | 3.4580  | 5.00E-04 | 0.0522 | 0.0057 | 0.9982 | 0.0075 | 0.0021   | 0.0054 |
| Non-cancer illness code self-reported: chronic obstructive airways disease/copd                                                              | European  | 0.6306  | 0.1812 | 3.4805  | 5.00E-04 | 0.0061 | 0.0015 | 0.9917 | 0.0071 | -0.0130  | 0.0047 |
| Illness injury bereavement stress in last 2 years: Serious illness injury or assault to yourself                                             | European  | 0.4508  | 0.1286 | 3.5052  | 5.00E-04 | 0.0142 | 0.0017 | 1.0110 | 0.0069 | -0.0072  | 0.0052 |
| Pain type(s) experienced in last month: Knee pain                                                                                            | European  | 0.2602  | 0.0758 | 3.4345  | 6.00E-04 | 0.0404 | 0.0023 | 1.0159 | 0.0084 | -0.0004  | 0.0054 |
| Pain type(s) experienced in last month: Pain all over the body                                                                               | European  | 0.4523  | 0.1324 | 3.4172  | 6.00E-04 | 0.0102 | 0.0016 | 1.0043 | 0.0074 | 0.0006   | 0.0048 |
| Exposure to tobacco smoke outside home                                                                                                       | European  | 0.2958  | 0.0875 | 3.3786  | 7.00E-04 | 0.0317 | 0.0024 | 1.0196 | 0.0083 | -0.0075  | 0.0049 |
| Wheeze or whistling in the chest in last year                                                                                                | European  | 0.2273  | 0.0673 | 3.3802  | 7.00E-04 | 0.0599 | 0.0032 | 1.0326 | 0.0107 | 0.0065   | 0.0057 |
| Former alcohol drinker                                                                                                                       | European  | 0.5736  | 0.1688 | 3.3987  | 7.00E-04 | 0.1204 | 0.0210 | 0.9981 | 0.0062 | -0.0122  | 0.0048 |
| Non-cancer illness code self-reported: depression                                                                                            | European  | 0.4314  | 0.1278 | 3.3750  | 7.00E-04 | 0.0183 | 0.0017 | 1.0017 | 0.0073 | -0.0011  | 0.0057 |
| Ever manic/hyper for 2 days                                                                                                                  | European  | 0.5974  | 0.1779 | 3.3573  | 8.00E-04 | 0.0180 | 0.0049 | 0.9958 | 0.0066 | -0.0117  | 0.0045 |
| Leg fat percentage (right)                                                                                                                   | European  | 0.1785  | 0.0533 | 3.3512  | 8.00E-04 | 0.2078 | 0.0066 | 1.0827 | 0.0169 | 0.0068   | 0.0066 |
| Blood clot DVT bronchitis emphysema asthma rhinitis eczema allergy diagnosed by doctor: Emphysema/chronic bronchitis                         | European  | 0.4465  | 0.1333 | 3.3487  | 8.00E-04 | 0.0127 | 0.0018 | 0.9848 | 0.0076 | -0.0044  | 0.0055 |
| Medication for pain relief constipation heartburn: Aspirin                                                                                   | European  | 0.3338  | 0.0999 | 3.3417  | 8.00E-04 | 0.0210 | 0.0018 | 1.0142 | 0.0069 | -0.0063  | 0.0051 |
| Pain type(s) experienced in last month: Back pain                                                                                            | European  | 0.2748  | 0.0817 | 3.3651  | 8.00E-04 | 0.0393 | 0.0023 | 1.0246 | 0.0091 | 0.0004   | 0.0057 |
| Non-cancer illness code self-reported: pulmonary embolism +/- dvt                                                                            | European  | 0.6978  | 0.2105 | 3.3156  | 9.00E-04 | 0.0050 | 0.0015 | 1.0112 | 0.0075 | -0.0126  | 0.0049 |
| Reason for glasses/contact lenses: For short-sightedness i.e. only or mainly for distance viewing such as driving cinema etc (called myopia) | European  | -0.3675 | 0.1107 | -3.3192 | 9.00E-04 | 0.0251 | 0.0021 | 1.1176 | 0.0091 | 0.0060   | 0.0055 |

| Trait                                                                                                          | ethnicity | rg      | SE     | z       | p        | h2_obs | se     | h2_int | se     | gcov_int | se     |
|----------------------------------------------------------------------------------------------------------------|-----------|---------|--------|---------|----------|--------|--------|--------|--------|----------|--------|
| Sleeplessness / insomnia                                                                                       | European  | 0.2281  | 0.0692 | 3.2982  | 1.00E-03 | 0.0627 | 0.0029 | 1.0165 | 0.0091 | 0.0001   | 0.0057 |
| Forced expiratory volume in 1-second (FEV1) predicted                                                          | European  | -0.2251 | 0.0682 | -3.2981 | 1.00E-03 | 0.1725 | 0.0123 | 1.0386 | 0.0121 | 0.0079   | 0.0050 |
| Illnesses of father: Chronic bronchitis/emphysema                                                              | European  | 0.3686  | 0.1124 | 3.2805  | 1.00E-03 | 0.0148 | 0.0020 | 1.0240 | 0.0069 | 0.0056   | 0.0046 |
| Mineral and other dietary supplements: Glucosamine                                                             | European  | -0.2806 | 0.0852 | -3.2921 | 1.00E-03 | 0.0243 | 0.0020 | 1.0100 | 0.0078 | -0.0016  | 0.0049 |
| Number of cigarettes previously smoked daily                                                                   | European  | 0.3129  | 0.0956 | 3.2731  | 1.10E-03 | 0.0997 | 0.0139 | 1.0029 | 0.0092 | -0.0069  | 0.0052 |
| Blood clot DVT bronchitis emphysema asthma rhinitis eczema allergy diagnosed by doctor: Blood clot in the lung | European  | 0.6526  | 0.2000 | 3.2631  | 1.10E-03 | 0.0053 | 0.0016 | 1.0117 | 0.0075 | -0.0112  | 0.0050 |
| Noisy workplace                                                                                                | European  | 0.3121  | 0.0966 | 3.2301  | 1.20E-03 | 0.0610 | 0.0058 | 1.0300 | 0.0078 | -0.0001  | 0.0050 |
| Ever had stillbirth spontaneous miscarriage or termination                                                     | European  | 0.4726  | 0.1474 | 3.2057  | 1.30E-03 | 0.0199 | 0.0032 | 0.9961 | 0.0077 | -0.0082  | 0.0051 |
| Leg fat percentage (left)                                                                                      | European  | 0.1727  | 0.0538 | 3.2097  | 1.30E-03 | 0.2075 | 0.0066 | 1.0871 | 0.0168 | 0.0074   | 0.0067 |
| Non-cancer illness code self-reported: hiatus hernia                                                           | European  | 0.4578  | 0.1437 | 3.1848  | 1.40E-03 | 0.0083 | 0.0014 | 1.0329 | 0.0065 | -0.0031  | 0.0047 |
| Diagnoses - main ICD10: K21 Gastro-oesophageal reflux disease                                                  | European  | 0.5224  | 0.1634 | 3.1971  | 1.40E-03 | 0.0066 | 0.0013 | 1.0010 | 0.0058 | -0.0009  | 0.0047 |
| Job involves heavy manual or physical work                                                                     | European  | 0.2262  | 0.0719 | 3.1460  | 1.70E-03 | 0.0864 | 0.0046 | 1.0386 | 0.0093 | 0.0037   | 0.0058 |
| Number of cigarettes currently smoked daily (current cigarette smokers)                                        | European  | 0.5826  | 0.1871 | 3.1130  | 1.90E-03 | 0.1014 | 0.0265 | 1.0012 | 0.0072 | -0.0116  | 0.0055 |
| Financial situation satisfaction                                                                               | European  | 0.3318  | 0.1071 | 3.0990  | 1.90E-03 | 0.0573 | 0.0060 | 1.0056 | 0.0080 | -0.0033  | 0.0052 |
| Non-cancer illness code self-reported: emphysema/chronic bronchitis                                            | European  | 0.4667  | 0.1503 | 3.1053  | 1.90E-03 | 0.0099 | 0.0017 | 0.9870 | 0.0071 | -0.0018  | 0.0054 |
| Job involves shift work                                                                                        | European  | 0.2839  | 0.0924 | 3.0708  | 2.10E-03 | 0.0309 | 0.0029 | 1.0012 | 0.0066 | -0.0011  | 0.0050 |
| Duration walking for pleasure                                                                                  | European  | -0.3161 | 0.1029 | -3.0707 | 2.10E-03 | 0.0249 | 0.0024 | 1.0135 | 0.0071 | 0.0056   | 0.0050 |
| Why stopped smoking: Doctors advice                                                                            | European  | 0.6921  | 0.2265 | 3.0563  | 2.20E-03 | 0.0171 | 0.0049 | 0.9995 | 0.0057 | -0.0073  | 0.0045 |
| Non-cancer illness code self-reported: diabetes                                                                | European  | 0.2540  | 0.0833 | 3.0492  | 2.30E-03 | 0.0358 | 0.0025 | 1.0377 | 0.0106 | -0.0047  | 0.0055 |
| Fluid intelligence score                                                                                       | European  | -0.1775 | 0.0584 | -3.0393 | 2.40E-03 | 0.2363 | 0.0108 | 1.0455 | 0.0109 | 0.0002   | 0.0055 |
| Pain type(s) experienced in last month: Stomach or abdominal pain                                              | European  | 0.3368  | 0.1116 | 3.0183  | 2.50E-03 | 0.0213 | 0.0018 | 1.0088 | 0.0074 | -0.0003  | 0.0048 |
| Illness injury bereavement stress in last 2 years: Marital separation/divorce                                  | European  | 0.6609  | 0.2201 | 3.0029  | 2.70E-03 | 0.0042 | 0.0015 | 1.0094 | 0.0070 | -0.0071  | 0.0044 |
| Non-cancer illness code self-reported: osteoarthritis                                                          | European  | 0.3006  | 0.1011 | 2.9747  | 2.90E-03 | 0.0190 | 0.0018 | 1.0278 | 0.0080 | -0.0013  | 0.0055 |
| Neuroticism score                                                                                              | European  | 0.2664  | 0.0908 | 2.9336  | 3.40E-03 | 0.1182 | 0.0064 | 1.0187 | 0.0142 | 0.0068   | 0.0068 |
| Guilty feelings                                                                                                | European  | 0.2707  | 0.0931 | 2.9071  | 3.60E-03 | 0.0516 | 0.0027 | 1.0056 | 0.0088 | -0.0024  | 0.0059 |
| Had other major operations                                                                                     | European  | 0.3145  | 0.1090 | 2.8845  | 3.90E-03 | 0.0294 | 0.0031 | 1.0137 | 0.0069 | 0.0021   | 0.0051 |
| Diagnoses - main ICD10: N92 Excessive frequent and irregular menstruation                                      | European  | 0.4735  | 0.1664 | 2.8457  | 4.40E-03 | 0.0070 | 0.0017 | 1.0011 | 0.0075 | -0.0024  | 0.0051 |
| Types of physical activity in last 4 weeks: None of the above                                                  | European  | 0.2809  | 0.0996 | 2.8210  | 4.80E-03 | 0.0239 | 0.0017 | 1.0185 | 0.0072 | 0.0022   | 0.0055 |
| Diagnoses - main ICD10: K22 Other diseases of oesophagus                                                       | European  | 0.6356  | 0.2261 | 2.8108  | 4.90E-03 | 0.0042 | 0.0015 | 1.0041 | 0.0068 | -0.0065  | 0.0052 |
| Exposure to tobacco smoke at home                                                                              | European  | 0.3804  | 0.1354 | 2.8094  | 5.00E-03 | 0.0116 | 0.0016 | 0.9995 | 0.0064 | -0.0003  | 0.0049 |
| Miserableness                                                                                                  | European  | 0.2553  | 0.0917 | 2.7838  | 5.40E-03 | 0.0643 | 0.0037 | 1.0177 | 0.0110 | 0.0091   | 0.0059 |

| Trait                                                                                                    | ethnicity | rg      | SE     | z       | p        | h2_obs | se     | h2_int | se     | gcov_int | se     |
|----------------------------------------------------------------------------------------------------------|-----------|---------|--------|---------|----------|--------|--------|--------|--------|----------|--------|
| Vascular/heart problems diagnosed by doctor: None of the above                                           | European  | -0.1727 | 0.0627 | -2.7555 | 5.90E-03 | 0.1129 | 0.0049 | 1.0619 | 0.0159 | -0.0018  | 0.0068 |
| Illnesses of mother: None of the above (group 1)                                                         | European  | -0.2879 | 0.1048 | -2.7464 | 6.00E-03 | 0.0164 | 0.0018 | 1.0158 | 0.0075 | 0.0046   | 0.0052 |
| Sensitivity / hurt feelings                                                                              | European  | 0.2371  | 0.0875 | 2.7106  | 6.70E-03 | 0.0632 | 0.0032 | 1.0182 | 0.0096 | 0.0018   | 0.0064 |
| Alcohol intake frequency.                                                                                | European  | 0.1580  | 0.0589 | 2.6809  | 7.30E-03 | 0.0829 | 0.0042 | 1.0479 | 0.0114 | 0.0040   | 0.0054 |
| Diagnoses - main ICD10: K57 Diverticular disease of intestine                                            | European  | 0.3274  | 0.1219 | 2.6850  | 7.30E-03 | 0.0131 | 0.0015 | 1.0032 | 0.0067 | -0.0035  | 0.0051 |
| Hand grip strength (left)                                                                                | European  | -0.1553 | 0.0581 | -2.6728 | 7.50E-03 | 0.1037 | 0.0042 | 1.0577 | 0.0126 | 0.0066   | 0.0062 |
| Average weekly red wine intake                                                                           | European  | -0.2103 | 0.0788 | -2.6705 | 7.60E-03 | 0.0566 | 0.0036 | 1.0126 | 0.0083 | -0.0046  | 0.0049 |
| Medication for cholesterol blood pressure diabetes or take exogenous hormones: Blood pressure medication | European  | 0.2155  | 0.0809 | 2.6651  | 7.70E-03 | 0.1050 | 0.0068 | 1.0320 | 0.0123 | -0.0076  | 0.0061 |
| Ever used hormone-replacement therapy (HRT)                                                              | European  | 0.2541  | 0.0962 | 2.6398  | 8.30E-03 | 0.0405 | 0.0033 | 1.0001 | 0.0073 | 0.0044   | 0.0051 |
| Non-cancer illness code self-reported: gastro-oesophageal reflux (gord) / gastric reflux                 | European  | 0.3278  | 0.1248 | 2.6255  | 8.70E-03 | 0.0114 | 0.0017 | 1.0144 | 0.0074 | -0.0003  | 0.0053 |
| Frequency of stair climbing in last 4 weeks                                                              | European  | -0.2167 | 0.0834 | -2.5975 | 9.40E-03 | 0.0352 | 0.0022 | 1.0159 | 0.0077 | 0.0129   | 0.0052 |
| Hand grip strength (right)                                                                               | European  | -0.1576 | 0.0608 | -2.5937 | 9.50E-03 | 0.1033 | 0.0044 | 1.0652 | 0.0138 | 0.0082   | 0.0062 |
| Medication for pain relief constipation heartburn: Laxatives (e.g. Dulcolax Senokot)                     | European  | 0.2997  | 0.1163 | 2.5758  | 1.00E-02 | 0.0114 | 0.0016 | 1.0101 | 0.0069 | -0.0031  | 0.0050 |
| Types of physical activity in last 4 weeks: Other exercises (eg: swimming cycling keep fit bowling)      | European  | -0.1915 | 0.0745 | -2.5693 | 1.02E-02 | 0.0469 | 0.0023 | 1.0111 | 0.0087 | -0.0075  | 0.0057 |
| Number of full sisters                                                                                   | European  | 0.2695  | 0.1053 | 2.5595  | 1.05E-02 | 0.0187 | 0.0018 | 1.0394 | 0.0069 | 0.0030   | 0.0056 |
| Forced expiratory volume in 1-second (FEV1) predicted percentage                                         | European  | -0.1857 | 0.0725 | -2.5600 | 1.05E-02 | 0.2012 | 0.0099 | 1.0352 | 0.0097 | 0.0079   | 0.0057 |
| Prospective memory result                                                                                | European  | 0.2514  | 0.0984 | 2.5538  | 1.07E-02 | 0.0587 | 0.0051 | 1.0100 | 0.0079 | 0.0014   | 0.0051 |
| Illnesses of mother: Chronic bronchitis/emphysema                                                        | European  | 0.3186  | 0.1253 | 2.5431  | 1.10E-02 | 0.0124 | 0.0020 | 1.0063 | 0.0071 | 0.0017   | 0.0047 |
| Transport type for commuting to job workplace: Cycle                                                     | European  | -0.2430 | 0.0961 | -2.5291 | 1.14E-02 | 0.0307 | 0.0033 | 1.0184 | 0.0071 | -0.0017  | 0.0048 |
| Arm fat percentage (right)                                                                               | European  | 0.1366  | 0.0545 | 2.5052  | 1.22E-02 | 0.2152 | 0.0076 | 1.0820 | 0.0179 | 0.0074   | 0.0068 |
| Non-cancer illness code self-reported: type 2 diabetes                                                   | European  | 0.4307  | 0.1719 | 2.5056  | 1.22E-02 | 0.0065 | 0.0014 | 1.0100 | 0.0064 | -0.0074  | 0.0047 |
| Sitting height                                                                                           | European  | -0.1218 | 0.0487 | -2.5012 | 1.24E-02 | 0.3204 | 0.0184 | 1.1440 | 0.0434 | 0.0065   | 0.0074 |
| Reason for glasses/contact lenses: For astigmatism                                                       | European  | -0.3511 | 0.1406 | -2.4972 | 1.25E-02 | 0.0088 | 0.0015 | 1.0278 | 0.0066 | 0.0071   | 0.0050 |
| Types of transport used (excluding work): Cycle                                                          | European  | -0.2281 | 0.0914 | -2.4967 | 1.25E-02 | 0.0250 | 0.0019 | 1.0239 | 0.0070 | -0.0028  | 0.0054 |
| Hearing difficulty/problems with background noise                                                        | European  | 0.1833  | 0.0738 | 2.4852  | 1.29E-02 | 0.0517 | 0.0026 | 1.0195 | 0.0088 | -0.0050  | 0.0055 |
| Body fat percentage                                                                                      | European  | 0.1301  | 0.0525 | 2.4770  | 1.32E-02 | 0.2156 | 0.0073 | 1.0885 | 0.0180 | 0.0086   | 0.0066 |
| Mouth/teeth dental problems: Painful gums                                                                | European  | 0.3842  | 0.1555 | 2.4713  | 1.35E-02 | 0.0070 | 0.0014 | 1.0034 | 0.0064 | -0.0007  | 0.0052 |
| Pain type(s) experienced in last month: Facial pain                                                      | European  | 0.4843  | 0.1963 | 2.4676  | 1.36E-02 | 0.0070 | 0.0015 | 0.9966 | 0.0065 | -0.0033  | 0.0054 |
| Body mass index (BMI)                                                                                    | European  | 0.1375  | 0.0559 | 2.4589  | 1.39E-02 | 0.2467 | 0.0090 | 1.0767 | 0.0193 | 0.0057   | 0.0075 |
| Arm fat percentage (left)                                                                                | European  | 0.1335  | 0.0545 | 2.4483  | 1.44E-02 | 0.2186 | 0.0078 | 1.0772 | 0.0182 | 0.0064   | 0.0068 |

| Trait                                                                                             | ethnicity | rg      | SE     | z       | p        | h2_obs | se     | h2_int | se     | gcov_int | se     |
|---------------------------------------------------------------------------------------------------|-----------|---------|--------|---------|----------|--------|--------|--------|--------|----------|--------|
| Diagnoses - main ICD10: J44 Other chronic obstructive pulmonary disease                           | European  | 0.5240  | 0.2146 | 2.4412  | 1.46E-02 | 0.0046 | 0.0014 | 0.9960 | 0.0070 | -0.0034  | 0.0045 |
| Fed-up feelings                                                                                   | European  | 0.1969  | 0.0810 | 2.4315  | 1.50E-02 | 0.0715 | 0.0033 | 1.0266 | 0.0103 | 0.0115   | 0.0058 |
| Diagnoses - main ICD10: R10 Abdominal and pelvic pain                                             | European  | 0.2985  | 0.1228 | 2.4313  | 1.50E-02 | 0.0125 | 0.0017 | 0.9935 | 0.0072 | 0.0009   | 0.0053 |
| Had major operations                                                                              | European  | 0.2935  | 0.1207 | 2.4311  | 1.51E-02 | 0.0251 | 0.0036 | 1.0052 | 0.0075 | -0.0038  | 0.0049 |
| Tobacco smoking: Ex-smoker                                                                        | European  | 0.2814  | 0.1158 | 2.4307  | 1.51E-02 | 0.0777 | 0.0082 | 1.0074 | 0.0082 | 0.0046   | 0.0052 |
| Neck/shoulder pain for 3+ months                                                                  | European  | 0.5169  | 0.2146 | 2.4091  | 1.60E-02 | 0.0202 | 0.0061 | 1.0096 | 0.0074 | -0.0065  | 0.0049 |
| Ever depressed for a whole week                                                                   | European  | 0.2362  | 0.0988 | 2.3912  | 1.68E-02 | 0.0630 | 0.0053 | 0.9943 | 0.0071 | 0.0029   | 0.0049 |
| Illnesses of siblings: Diabetes                                                                   | European  | 0.2821  | 0.1191 | 2.3689  | 1.78E-02 | 0.0206 | 0.0021 | 1.0100 | 0.0070 | 0.0018   | 0.0053 |
| Frequency of walking for pleasure in last 4 weeks                                                 | European  | 0.2183  | 0.0924 | 2.3634  | 1.81E-02 | 0.0346 | 0.0026 | 1.0066 | 0.0077 | -0.0014  | 0.0054 |
| Mouth/teeth dental problems: Toothache                                                            | European  | 0.3145  | 0.1332 | 2.3609  | 1.82E-02 | 0.0086 | 0.0016 | 1.0034 | 0.0074 | -0.0005  | 0.0051 |
| Vascular/heart problems diagnosed by doctor: High blood pressure                                  | European  | 0.1473  | 0.0626 | 2.3532  | 1.86E-02 | 0.1161 | 0.0052 | 1.0623 | 0.0171 | 0.0032   | 0.0068 |
| Diagnoses - main ICD10: K29 Gastritis and duodenitis                                              | European  | 0.3420  | 0.1456 | 2.3483  | 1.89E-02 | 0.0075 | 0.0015 | 1.0035 | 0.0065 | 0.0026   | 0.0050 |
| Pulse wave peak to peak time                                                                      | European  | -0.2738 | 0.1167 | -2.3454 | 1.90E-02 | 0.0393 | 0.0048 | 1.0106 | 0.0076 | -0.0006  | 0.0045 |
| Diagnoses - main ICD10: M54 Dorsalgia                                                             | European  | 0.3320  | 0.1417 | 2.3427  | 1.91E-02 | 0.0100 | 0.0015 | 1.0040 | 0.0075 | -0.0007  | 0.0050 |
| Mean time to correctly identify matches                                                           | European  | 0.1543  | 0.0659 | 2.3422  | 1.92E-02 | 0.0722 | 0.0030 | 1.0371 | 0.0099 | -0.0155  | 0.0056 |
| Vitamin and mineral supplements: Vitamin D                                                        | European  | -0.3596 | 0.1537 | -2.3405 | 1.93E-02 | 0.0061 | 0.0015 | 0.9970 | 0.0070 | 0.0054   | 0.0048 |
| Types of physical activity in last 4 weeks: Walking for pleasure (not as a means of transport)    | European  | -0.1906 | 0.0819 | -2.3268 | 2.00E-02 | 0.0370 | 0.0021 | 1.0429 | 0.0078 | -0.0010  | 0.0055 |
| Drive faster than motorway speed limit                                                            | European  | -0.1799 | 0.0774 | -2.3254 | 2.01E-02 | 0.0565 | 0.0028 | 1.0302 | 0.0088 | 0.0035   | 0.0052 |
| Transport type for commuting to job workplace: Public transport                                   | European  | -0.2603 | 0.1121 | -2.3211 | 2.03E-02 | 0.0319 | 0.0035 | 1.0237 | 0.0076 | 0.0044   | 0.0054 |
| Illness injury bereavement stress in last 2 years: Death of a close relative                      | European  | 0.3540  | 0.1534 | 2.3075  | 2.10E-02 | 0.0062 | 0.0015 | 1.0052 | 0.0066 | 0.0006   | 0.0049 |
| Non-cancer illness code self-reported: hypertension                                               | European  | 0.1423  | 0.0621 | 2.2899  | 2.20E-02 | 0.1146 | 0.0051 | 1.0560 | 0.0171 | 0.0033   | 0.0065 |
| Diagnoses - main ICD10: I83 Varicose veins of lower extremities                                   | European  | 0.2664  | 0.1168 | 2.2816  | 2.25E-02 | 0.0193 | 0.0022 | 1.0334 | 0.0108 | -0.0033  | 0.0056 |
| Ever had hysterectomy (womb removed)                                                              | European  | 0.3511  | 0.1549 | 2.2662  | 2.34E-02 | 0.0212 | 0.0034 | 1.0069 | 0.0076 | 0.0003   | 0.0055 |
| Illnesses of siblings: High blood pressure                                                        | European  | 0.1939  | 0.0857 | 2.2630  | 2.36E-02 | 0.0366 | 0.0027 | 1.0066 | 0.0082 | 0.0004   | 0.0057 |
| Smoking/smokers in household                                                                      | European  | 0.3445  | 0.1528 | 2.2545  | 2.42E-02 | 0.0097 | 0.0019 | 1.0131 | 0.0075 | 0.0025   | 0.0056 |
| Types of transport used (excluding work): Car/motor vehicle                                       | European  | -0.2182 | 0.0971 | -2.2471 | 2.46E-02 | 0.0247 | 0.0018 | 1.0076 | 0.0075 | 0.0085   | 0.0054 |
| Qualifications: O levels/GCSEs or equivalent                                                      | European  | -0.1736 | 0.0773 | -2.2457 | 2.47E-02 | 0.0487 | 0.0025 | 1.0154 | 0.0096 | -0.0010  | 0.0057 |
| Other eye problems                                                                                | European  | 0.3406  | 0.1535 | 2.2190  | 2.65E-02 | 0.0094 | 0.0015 | 1.0230 | 0.0072 | 0.0035   | 0.0052 |
| Illnesses of siblings: None of the above (group 2)                                                | European  | -0.3301 | 0.1489 | -2.2162 | 2.67E-02 | 0.0087 | 0.0018 | 1.0044 | 0.0067 | 0.0033   | 0.0049 |
| Qualifications: Other professional qualifications eg: nursing teaching                            | European  | -0.1567 | 0.0708 | -2.2121 | 2.70E-02 | 0.0467 | 0.0025 | 1.0287 | 0.0093 | -0.0096  | 0.0055 |
| Types of physical activity in last 4 weeks: Heavy DIY (eg: weeding lawn mowing carpentry digging) | European  | -0.1816 | 0.0824 | -2.2034 | 2.76E-02 | 0.0341 | 0.0020 | 1.0069 | 0.0075 | 0.0011   | 0.0050 |



| Trait                                                                                                               | ethnicity | rg      | SE     | z       | p        | h2_obs | se     | h2_int | se     | gcov_int | se     |
|---------------------------------------------------------------------------------------------------------------------|-----------|---------|--------|---------|----------|--------|--------|--------|--------|----------|--------|
| Maximum workload during fitness test                                                                                | European  | -0.3906 | 0.1781 | -2.1934 | 2.83E-02 | 0.0421 | 0.0101 | 1.0078 | 0.0071 | -0.0003  | 0.0049 |
| Leg fat mass (right)                                                                                                | European  | 0.1192  | 0.0544 | 2.1918  | 2.84E-02 | 0.2300 | 0.0082 | 1.0731 | 0.0182 | 0.0088   | 0.0071 |
| Number of trend entries                                                                                             | European  | -0.4544 | 0.2078 | -2.1864 | 2.88E-02 | 0.0312 | 0.0096 | 1.0057 | 0.0070 | 0.0011   | 0.0046 |
| Age when periods started (menarche)                                                                                 | European  | -0.1277 | 0.0588 | -2.1737 | 2.97E-02 | 0.2091 | 0.0103 | 1.0052 | 0.0127 | 0.0059   | 0.0059 |
| Non-cancer illness code self-reported: anxiety/panic attacks                                                        | European  | 0.3799  | 0.1753 | 2.1675  | 3.02E-02 | 0.0062 | 0.0012 | 0.9991 | 0.0059 | 0.0029   | 0.0049 |
| Vascular/heart problems diagnosed by doctor: Heart attack                                                           | European  | 0.1908  | 0.0892 | 2.1389  | 3.24E-02 | 0.0186 | 0.0019 | 1.0145 | 0.0077 | 0.0006   | 0.0048 |
| Non-cancer illness code self-reported: heart attack/myocardial infarction                                           | European  | 0.1879  | 0.0885 | 2.1223  | 3.38E-02 | 0.0190 | 0.0018 | 1.0126 | 0.0075 | 0.0009   | 0.0048 |
| Irritability                                                                                                        | European  | 0.2067  | 0.0983 | 2.1028  | 3.55E-02 | 0.0679 | 0.0043 | 0.9934 | 0.0117 | -0.0017  | 0.0064 |
| Illnesses of mother: Diabetes                                                                                       | European  | 0.2180  | 0.1038 | 2.0992  | 3.58E-02 | 0.0203 | 0.0019 | 1.0180 | 0.0093 | -0.0006  | 0.0050 |
| Daytime dozing / sleeping (narcolepsy)                                                                              | European  | 0.1454  | 0.0693 | 2.0972  | 3.60E-02 | 0.0485 | 0.0028 | 1.0111 | 0.0089 | -0.0059  | 0.0051 |
| Hearing difficulty/problems: Yes                                                                                    | European  | 0.1642  | 0.0785 | 2.0929  | 3.64E-02 | 0.0416 | 0.0024 | 1.0139 | 0.0090 | -0.0026  | 0.0053 |
| Leg fat mass (left)                                                                                                 | European  | 0.1132  | 0.0543 | 2.0859  | 3.70E-02 | 0.2309 | 0.0082 | 1.0745 | 0.0182 | 0.0096   | 0.0072 |
| Average weekly champagne plus white wine intake                                                                     | European  | -0.2000 | 0.0971 | -2.0596 | 3.94E-02 | 0.0303 | 0.0027 | 1.0424 | 0.0081 | -0.0006  | 0.0054 |
| Handedness (chirality/laterality): Use both right and left hands equally                                            | European  | 0.3961  | 0.1923 | 2.0595  | 3.94E-02 | 0.0039 | 0.0014 | 1.0078 | 0.0068 | -0.0071  | 0.0049 |
| Number of live births                                                                                               | European  | 0.1625  | 0.0789 | 2.0578  | 3.96E-02 | 0.0613 | 0.0042 | 1.0080 | 0.0083 | -0.0036  | 0.0056 |
| Number of unsuccessful stop-smoking attempts                                                                        | European  | 0.2703  | 0.1315 | 2.0561  | 3.98E-02 | 0.0502 | 0.0072 | 1.0064 | 0.0070 | -0.0013  | 0.0054 |
| Non-cancer illness code self-reported: high cholesterol                                                             | European  | 0.1707  | 0.0831 | 2.0545  | 3.99E-02 | 0.0401 | 0.0056 | 1.0582 | 0.0287 | 0.0002   | 0.0061 |
| Nervous feelings                                                                                                    | European  | 0.1928  | 0.0948 | 2.0329  | 4.21E-02 | 0.0666 | 0.0040 | 1.0122 | 0.0124 | 0.0002   | 0.0064 |
| Pain type(s) experienced in last month: Hip pain                                                                    | European  | 0.1828  | 0.0899 | 2.0330  | 4.21E-02 | 0.0238 | 0.0020 | 1.0179 | 0.0077 | -0.0051  | 0.0048 |
| Duration of heavy DIY                                                                                               | European  | 0.2352  | 0.1162 | 2.0246  | 4.29E-02 | 0.0334 | 0.0038 | 1.0079 | 0.0070 | -0.0068  | 0.0052 |
| Tinnitus: Yes but not now but have in the past                                                                      | European  | 0.3466  | 0.1713 | 2.0237  | 4.30E-02 | 0.0179 | 0.0043 | 0.9923 | 0.0065 | -0.0042  | 0.0054 |
| Blood clot DVT bronchitis emphysema asthma rhinitis eczema allergy diagnosed by doctor: Blood clot in the leg (DVT) | European  | 0.3116  | 0.1542 | 2.0203  | 4.34E-02 | 0.0103 | 0.0017 | 1.0117 | 0.0093 | -0.0061  | 0.0053 |
| Job involves mainly walking or standing                                                                             | European  | 0.1478  | 0.0733 | 2.0176  | 4.36E-02 | 0.0796 | 0.0046 | 1.0329 | 0.0093 | 0.0027   | 0.0054 |
| Non-cancer illness code self-reported: rheumatoid arthritis                                                         | European  | 0.3773  | 0.1872 | 2.0148  | 4.39E-02 | 0.0046 | 0.0014 | 1.0055 | 0.0065 | -0.0075  | 0.0044 |
| Fathers age at death                                                                                                | European  | -0.2033 | 0.1015 | -2.0032 | 4.52E-02 | 0.0342 | 0.0032 | 1.0227 | 0.0082 | -0.0004  | 0.0058 |
| Diagnoses - main ICD10: R04 Haemorrhage from respiratory passages                                                   | European  | 0.5736  | 0.2898 | 1.9793  | 4.78E-02 | 0.0025 | 0.0015 | 0.9980 | 0.0066 | -0.0037  | 0.0049 |
| Illnesses of siblings: Severe depression                                                                            | European  | 0.2325  | 0.1178 | 1.9743  | 4.83E-02 | 0.0145 | 0.0019 | 1.0030 | 0.0067 | -0.0001  | 0.0049 |
| Diagnoses - main ICD10: K30 Dyspepsia                                                                               | European  | 0.5083  | 0.2593 | 1.9605  | 4.99E-02 | 0.0028 | 0.0014 | 1.0061 | 0.0067 | -0.0043  | 0.0047 |
| Non-cancer illness code self-reported: hayfever/allergic rhinitis                                                   | European  | -0.1873 | 0.0959 | -1.9545 | 5.06E-02 | 0.0228 | 0.0025 | 1.0195 | 0.0090 | 0.0026   | 0.0051 |
| Trunk fat percentage                                                                                                | European  | 0.0993  | 0.0514 | 1.9303  | 5.36E-02 | 0.2055 | 0.0073 | 1.0900 | 0.0183 | 0.0095   | 0.0063 |
| Current employment status: In paid employment or self-employed                                                      | European  | -0.2651 | 0.1376 | -1.9271 | 5.40E-02 | 0.0080 | 0.0015 | 1.0198 | 0.0067 | 0.0056   | 0.0046 |
| Mineral and other dietary supplements: Selenium                                                                     | European  | 0.3272  | 0.1704 | 1.9209  | 5.47E-02 | 0.0063 | 0.0015 | 1.0004 | 0.0074 | -0.0115  | 0.0048 |

| Trait                                                                                                                        | ethnicity | rg      | SE     | z       | p        | h2_obs | se     | h2_int | se     | gcov_int | se     |
|------------------------------------------------------------------------------------------------------------------------------|-----------|---------|--------|---------|----------|--------|--------|--------|--------|----------|--------|
| Breastfed as a baby                                                                                                          | European  | -0.1849 | 0.0969 | -1.9087 | 5.63E-02 | 0.0260 | 0.0024 | 1.0211 | 0.0072 | -0.0059  | 0.0050 |
| Diagnoses - main ICD10: J34 Other disorders of nose and nasal sinuses                                                        | European  | 0.4965  | 0.2604 | 1.9067  | 5.66E-02 | 0.0026 | 0.0014 | 1.0064 | 0.0065 | 0.0009   | 0.0047 |
| Diagnoses - main ICD10: K20 Oesophagitis                                                                                     | European  | 0.5713  | 0.3004 | 1.9014  | 5.72E-02 | 0.0020 | 0.0013 | 1.0076 | 0.0065 | 0.0022   | 0.0047 |
| Illnesses of father: None of the above (group 1)                                                                             | European  | -0.2478 | 0.1323 | -1.8733 | 6.10E-02 | 0.0145 | 0.0019 | 1.0251 | 0.0072 | 0.0020   | 0.0049 |
| Adopted as a child                                                                                                           | European  | 0.3245  | 0.1743 | 1.8619  | 6.26E-02 | 0.0056 | 0.0014 | 1.0030 | 0.0068 | -0.0011  | 0.0048 |
| Illnesses of mother: Heart disease                                                                                           | European  | 0.2034  | 0.1093 | 1.8614  | 6.27E-02 | 0.0155 | 0.0018 | 1.0121 | 0.0069 | 0.0014   | 0.0053 |
| Duration of light DIY                                                                                                        | European  | 0.1678  | 0.0908 | 1.8488  | 6.45E-02 | 0.0355 | 0.0034 | 1.0024 | 0.0073 | 0.0004   | 0.0049 |
| Comparative height size at age 10                                                                                            | European  | -0.0920 | 0.0500 | -1.8403 | 6.57E-02 | 0.2411 | 0.0120 | 1.1160 | 0.0339 | 0.0056   | 0.0064 |
| Loud music exposure frequency                                                                                                | European  | 0.2358  | 0.1302 | 1.8106  | 7.02E-02 | 0.0284 | 0.0047 | 1.0149 | 0.0075 | -0.0034  | 0.0048 |
| Impedance of arm (left)                                                                                                      | European  | -0.1001 | 0.0556 | -1.8020 | 7.15E-02 | 0.2315 | 0.0084 | 1.1055 | 0.0221 | 0.0055   | 0.0076 |
| Arm fat mass (right)                                                                                                         | European  | 0.0987  | 0.0550 | 1.7926  | 7.30E-02 | 0.2304 | 0.0087 | 1.0738 | 0.0183 | 0.0077   | 0.0071 |
| Duration of walks                                                                                                            | European  | 0.1376  | 0.0768 | 1.7915  | 7.32E-02 | 0.0462 | 0.0029 | 1.0093 | 0.0088 | 0.0037   | 0.0050 |
| Family relationship satisfaction                                                                                             | European  | 0.1799  | 0.1007 | 1.7863  | 7.41E-02 | 0.0574 | 0.0050 | 1.0052 | 0.0077 | -0.0076  | 0.0055 |
| Types of physical activity in last 4 weeks: Light DIY (eg: pruning watering the lawn)                                        | European  | -0.1463 | 0.0821 | -1.7825 | 7.47E-02 | 0.0393 | 0.0023 | 1.0029 | 0.0085 | -0.0058  | 0.0060 |
| Transport type for commuting to job workplace: Walk                                                                          | European  | -0.2480 | 0.1394 | -1.7790 | 7.52E-02 | 0.0166 | 0.0028 | 1.0039 | 0.0066 | 0.0089   | 0.0049 |
| Blood clot DVT bronchitis emphysema asthma rhinitis eczema allergy diagnosed by doctor: Hayfever allergic rhinitis or eczema | European  | -0.1116 | 0.0628 | -1.7772 | 7.55E-02 | 0.0723 | 0.0058 | 1.0445 | 0.0167 | 0.0085   | 0.0058 |
| Illnesses of father: High blood pressure                                                                                     | European  | 0.1969  | 0.1111 | 1.7715  | 7.65E-02 | 0.0191 | 0.0019 | 1.0152 | 0.0076 | -0.0098  | 0.0053 |
| Waist circumference                                                                                                          | European  | 0.0922  | 0.0521 | 1.7699  | 7.67E-02 | 0.1996 | 0.0078 | 1.0654 | 0.0180 | 0.0100   | 0.0065 |
| Risk taking                                                                                                                  | European  | 0.1345  | 0.0770 | 1.7468  | 8.07E-02 | 0.0557 | 0.0029 | 1.0047 | 0.0095 | 0.0073   | 0.0057 |
| Medication for cholesterol blood pressure or diabetes: None of the above                                                     | European  | -0.1419 | 0.0820 | -1.7304 | 8.36E-02 | 0.0879 | 0.0051 | 1.0352 | 0.0106 | -0.0035  | 0.0060 |
| Suffer from nerves                                                                                                           | European  | 0.1685  | 0.0980 | 1.7198  | 8.55E-02 | 0.0458 | 0.0032 | 0.9985 | 0.0101 | 0.0091   | 0.0059 |
| Non-cancer illness code self-reported: joint disorder                                                                        | European  | -0.5475 | 0.3217 | -1.7019 | 8.88E-02 | 0.0020 | 0.0013 | 0.9923 | 0.0064 | 0.0122   | 0.0048 |
| Non-accidental death in close genetic family                                                                                 | European  | 0.3438  | 0.2028 | 1.6949  | 9.01E-02 | 0.0185 | 0.0048 | 0.9944 | 0.0066 | -0.0053  | 0.0054 |
| Non-cancer illness code self-reported: deep venous thrombosis (dvt)                                                          | European  | 0.2617  | 0.1544 | 1.6948  | 9.01E-02 | 0.0107 | 0.0018 | 1.0095 | 0.0093 | -0.0046  | 0.0055 |
| Illnesses of siblings: Stroke                                                                                                | European  | 0.3920  | 0.2323 | 1.6879  | 9.14E-02 | 0.0043 | 0.0018 | 1.0077 | 0.0066 | 0.0012   | 0.0052 |
| Medication for cholesterol blood pressure diabetes or take exogenous hormones: Hormone replacement therapy                   | European  | 0.2579  | 0.1536 | 1.6784  | 9.33E-02 | 0.0157 | 0.0027 | 1.0008 | 0.0063 | -0.0038  | 0.0051 |
| Ever stopped smoking for 6+ months                                                                                           | European  | 0.2790  | 0.1675 | 1.6660  | 9.57E-02 | 0.0194 | 0.0055 | 1.0015 | 0.0069 | 0.0040   | 0.0044 |
| Diagnoses - main ICD10: M10 Gout                                                                                             | European  | 0.4755  | 0.2899 | 1.6405  | 1.01E-01 | 0.0022 | 0.0015 | 0.9998 | 0.0071 | -0.0067  | 0.0052 |
| Bring up phlegm/sputum/mucus on most days                                                                                    | European  | 0.2457  | 0.1502 | 1.6364  | 1.02E-01 | 0.0272 | 0.0059 | 1.0066 | 0.0075 | 0.0017   | 0.0044 |
| Arm fat mass (left)                                                                                                          | European  | 0.0893  | 0.0548 | 1.6305  | 1.03E-01 | 0.2311 | 0.0088 | 1.0706 | 0.0183 | 0.0086   | 0.0070 |

| Trait                                                                                  | ethnicity | rg      | SE     | z       | p        | h2_obs | se     | h2_int | se     | gcov_int | se     |
|----------------------------------------------------------------------------------------|-----------|---------|--------|---------|----------|--------|--------|--------|--------|----------|--------|
| Non-cancer illness code self-reported: sleep apnoea                                    | European  | 0.3730  | 0.2289 | 1.6295  | 1.03E-01 | 0.0031 | 0.0014 | 1.0053 | 0.0070 | -0.0083  | 0.0047 |
| Whole body fat mass                                                                    | European  | 0.0865  | 0.0532 | 1.6259  | 1.04E-01 | 0.2336 | 0.0084 | 1.0784 | 0.0185 | 0.0099   | 0.0069 |
| Average weekly beer plus cider intake                                                  | European  | 0.1504  | 0.0935 | 1.6080  | 1.08E-01 | 0.0515 | 0.0034 | 1.0625 | 0.0093 | 0.0040   | 0.0061 |
| Duration of other exercises                                                            | European  | -0.2156 | 0.1352 | -1.5946 | 1.11E-01 | 0.0188 | 0.0031 | 1.0088 | 0.0074 | 0.0091   | 0.0050 |
| Diagnoses - main ICD10: K44 Diaphragmatic hernia                                       | European  | 0.3112  | 0.1978 | 1.5734  | 1.16E-01 | 0.0047 | 0.0013 | 1.0079 | 0.0064 | 0.0008   | 0.0049 |
| Non-cancer illness code self-reported: cholelithiasis/gall stones                      | European  | 0.2256  | 0.1442 | 1.5650  | 1.18E-01 | 0.0083 | 0.0018 | 1.0212 | 0.0083 | -0.0024  | 0.0048 |
| Happiness                                                                              | European  | 0.1434  | 0.0925 | 1.5501  | 1.21E-01 | 0.0602 | 0.0049 | 1.0077 | 0.0074 | -0.0011  | 0.0054 |
| Duration of vigorous activity                                                          | European  | 0.1634  | 0.1064 | 1.5359  | 1.25E-01 | 0.0359 | 0.0033 | 0.9923 | 0.0078 | 0.0011   | 0.0053 |
| Illnesses of siblings: Heart disease                                                   | European  | 0.1635  | 0.1077 | 1.5172  | 1.29E-01 | 0.0170 | 0.0022 | 1.0134 | 0.0071 | 0.0045   | 0.0041 |
| Mineral and other dietary supplements: Fish oil (including cod liver oil)              | European  | -0.1592 | 0.1050 | -1.5157 | 1.30E-01 | 0.0265 | 0.0019 | 1.0086 | 0.0071 | 0.0065   | 0.0059 |
| Impedance of arm (right)                                                               | European  | -0.0846 | 0.0563 | -1.5038 | 1.33E-01 | 0.2352 | 0.0084 | 1.0880 | 0.0223 | 0.0047   | 0.0075 |
| Diagnoses - main ICD10: I20 Angina pectoris                                            | European  | 0.2362  | 0.1585 | 1.4900  | 1.36E-01 | 0.0083 | 0.0015 | 1.0092 | 0.0072 | 0.0005   | 0.0051 |
| Non-cancer illness code self-reported: muscle or soft tissue injuries                  | European  | 0.4315  | 0.2897 | 1.4896  | 1.36E-01 | 0.0026 | 0.0015 | 0.9987 | 0.0074 | -0.0082  | 0.0055 |
| Non-cancer illness code self-reported: hypothyroidism/myxoedema                        | European  | 0.1457  | 0.0984 | 1.4803  | 1.39E-01 | 0.0507 | 0.0059 | 1.0340 | 0.0153 | 0.0000   | 0.0058 |
| Number of full brothers                                                                | European  | 0.1618  | 0.1094 | 1.4784  | 1.39E-01 | 0.0186 | 0.0018 | 1.0290 | 0.0071 | 0.0079   | 0.0052 |
| Hair/balding pattern: Pattern 3                                                        | European  | -0.1194 | 0.0812 | -1.4713 | 1.41E-01 | 0.0570 | 0.0143 | 1.0171 | 0.0200 | 0.0016   | 0.0050 |
| Frequency of light DIY in last 4 weeks                                                 | European  | 0.1589  | 0.1084 | 1.4664  | 1.43E-01 | 0.0230 | 0.0029 | 1.0014 | 0.0064 | -0.0015  | 0.0049 |
| Number of self-reported cancers                                                        | European  | 0.2254  | 0.1546 | 1.4587  | 1.45E-01 | 0.0065 | 0.0015 | 1.0138 | 0.0068 | -0.0018  | 0.0049 |
| Illnesses of father: Diabetes                                                          | European  | 0.1684  | 0.1157 | 1.4549  | 1.46E-01 | 0.0181 | 0.0023 | 1.0290 | 0.0079 | 0.0001   | 0.0054 |
| Weight change compared with 1 year ago                                                 | European  | 0.1955  | 0.1345 | 1.4534  | 1.46E-01 | 0.0086 | 0.0014 | 1.0226 | 0.0062 | 0.0024   | 0.0050 |
| Pulse wave Arterial Stiffness index                                                    | European  | 0.1695  | 0.1173 | 1.4452  | 1.48E-01 | 0.0382 | 0.0051 | 1.0094 | 0.0078 | 0.0032   | 0.0044 |
| Illnesses of mother: High blood pressure                                               | European  | 0.1323  | 0.0922 | 1.4350  | 1.51E-01 | 0.0290 | 0.0022 | 1.0204 | 0.0086 | -0.0029  | 0.0056 |
| Diagnoses - main ICD10: C44 Other malignant neoplasms of skin                          | European  | 0.1889  | 0.1319 | 1.4323  | 1.52E-01 | 0.0101 | 0.0023 | 1.0082 | 0.0088 | -0.0100  | 0.0049 |
| Sleep duration                                                                         | European  | -0.1081 | 0.0758 | -1.4258 | 1.54E-01 | 0.0711 | 0.0037 | 1.0254 | 0.0104 | -0.0093  | 0.0057 |
| Why reduced smoking: Illness or ill health                                             | European  | 0.3499  | 0.2459 | 1.4229  | 1.55E-01 | 0.1092 | 0.0429 | 0.9984 | 0.0064 | -0.0024  | 0.0050 |
| Mouth/teeth dental problems: Loose teeth                                               | European  | 0.1609  | 0.1136 | 1.4161  | 1.57E-01 | 0.0147 | 0.0017 | 1.0098 | 0.0072 | 0.0009   | 0.0051 |
| Eye problems/disorders: Diabetes related eye disease                                   | European  | 0.2143  | 0.1534 | 1.3973  | 1.62E-01 | 0.0199 | 0.0043 | 1.0071 | 0.0062 | 0.0026   | 0.0047 |
| Illnesses of father: Lung cancer                                                       | European  | 0.1710  | 0.1224 | 1.3970  | 1.62E-01 | 0.0150 | 0.0020 | 0.9925 | 0.0073 | 0.0057   | 0.0051 |
| Medication for cholesterol blood pressure or diabetes: Cholesterol lowering medication | European  | 0.1156  | 0.0827 | 1.3972  | 1.62E-01 | 0.0676 | 0.0065 | 1.0353 | 0.0146 | 0.0054   | 0.0054 |
| Diagnoses - main ICD10: L03 Cellulitis                                                 | European  | 0.3159  | 0.2263 | 1.3962  | 1.63E-01 | 0.0040 | 0.0015 | 1.0023 | 0.0070 | -0.0058  | 0.0054 |
| Fractured bone site(s): Other bones                                                    | European  | 0.1899  | 0.1364 | 1.3926  | 1.64E-01 | 0.0087 | 0.0016 | 1.0029 | 0.0067 | -0.0066  | 0.0048 |
| Mineral and other dietary supplements: None of the above                               | European  | 0.1298  | 0.0938 | 1.3832  | 1.67E-01 | 0.0296 | 0.0021 | 1.0121 | 0.0074 | 0.0000   | 0.0056 |

| Trait                                                                    | ethnicity | rg      | SE     | z       | p        | h2_obs | se     | h2_int | se     | gcov_int | se     |
|--------------------------------------------------------------------------|-----------|---------|--------|---------|----------|--------|--------|--------|--------|----------|--------|
| Diagnoses - main ICD10: R69 Unknown and unspecified causes of morbidity  | European  | 0.2583  | 0.1876 | 1.3767  | 1.69E-01 | 0.0049 | 0.0014 | 1.0009 | 0.0069 | 0.0055   | 0.0049 |
| Non-cancer illness code self-reported: migraine                          | European  | 0.1403  | 0.1024 | 1.3703  | 1.71E-01 | 0.0162 | 0.0019 | 1.0151 | 0.0077 | 0.0004   | 0.0045 |
| Heel bone mineral density (BMD) T-score automated                        | European  | 0.0885  | 0.0648 | 1.3659  | 1.72E-01 | 0.2966 | 0.0344 | 1.0795 | 0.0367 | -0.0061  | 0.0078 |
| Non-cancer illness code self-reported: vaginal prolapse/uterine prolapse | European  | 0.2829  | 0.2076 | 1.3629  | 1.73E-01 | 0.0046 | 0.0015 | 1.0071 | 0.0069 | -0.0005  | 0.0048 |
| Non-cancer illness code self-reported: retinal detachment                | European  | 0.3134  | 0.2329 | 1.3456  | 1.78E-01 | 0.0031 | 0.0013 | 1.0054 | 0.0068 | -0.0046  | 0.0051 |
| Reason for reducing amount of alcohol drunk: Health precaution           | European  | -0.1302 | 0.0974 | -1.3361 | 1.82E-01 | 0.0461 | 0.0044 | 0.9969 | 0.0068 | 0.0094   | 0.0051 |
| Trunk fat mass                                                           | European  | 0.0694  | 0.0520 | 1.3335  | 1.82E-01 | 0.2302 | 0.0083 | 1.0840 | 0.0191 | 0.0097   | 0.0067 |
| Alcohol drinker status: Never                                            | European  | -0.1450 | 0.1089 | -1.3321 | 1.83E-01 | 0.0143 | 0.0016 | 1.0176 | 0.0068 | 0.0122   | 0.0048 |
| Qualifications: CSEs or equivalent                                       | European  | 0.1279  | 0.0973 | 1.3142  | 1.89E-01 | 0.0209 | 0.0019 | 1.0593 | 0.0075 | 0.0043   | 0.0048 |
| Trunk predicted mass                                                     | European  | -0.0726 | 0.0553 | -1.3126 | 1.89E-01 | 0.2842 | 0.0130 | 1.1422 | 0.0321 | 0.0080   | 0.0078 |
| Non-cancer illness code self-reported: vitiligo                          | European  | 0.6103  | 0.4684 | 1.3031  | 1.93E-01 | 0.0013 | 0.0014 | 0.9959 | 0.0071 | -0.0023  | 0.0048 |
| Diastolic blood pressure automated reading                               | European  | 0.0839  | 0.0647 | 1.2979  | 1.94E-01 | 0.1356 | 0.0059 | 1.0682 | 0.0157 | -0.0012  | 0.0070 |
| Diagnoses - main ICD10: I30 Acute pericarditis                           | European  | -0.4104 | 0.3172 | -1.2941 | 1.96E-01 | 0.0020 | 0.0015 | 0.9968 | 0.0070 | 0.0026   | 0.0047 |
| Knee pain for 3+ months                                                  | European  | 0.2030  | 0.1569 | 1.2939  | 1.96E-01 | 0.0253 | 0.0067 | 1.0021 | 0.0064 | 0.0023   | 0.0050 |
| Trunk fat-free mass                                                      | European  | -0.0701 | 0.0553 | -1.2680 | 2.05E-01 | 0.2858 | 0.0131 | 1.1429 | 0.0323 | 0.0074   | 0.0078 |
| Wears glasses or contact lenses                                          | European  | -0.1265 | 0.0999 | -1.2663 | 2.05E-01 | 0.0160 | 0.0016 | 1.0020 | 0.0073 | 0.0056   | 0.0045 |
| Diagnoses - main ICD10: M17 Gonarthrosis [arthrosis of knee]             | European  | 0.1481  | 0.1175 | 1.2606  | 2.08E-01 | 0.0142 | 0.0017 | 1.0047 | 0.0077 | 0.0043   | 0.0054 |
| Diagnoses - main ICD10: I84 Haemorrhoids                                 | European  | 0.1612  | 0.1281 | 1.2584  | 2.08E-01 | 0.0094 | 0.0016 | 1.0013 | 0.0074 | -0.0023  | 0.0046 |
| Time spent watching television (TV)                                      | European  | 0.0832  | 0.0665 | 1.2511  | 2.11E-01 | 0.0993 | 0.0041 | 1.0568 | 0.0115 | 0.0084   | 0.0066 |
| Tinnitus: Yes now some of the time                                       | European  | 0.3305  | 0.2663 | 1.2411  | 2.15E-01 | 0.0077 | 0.0040 | 1.0017 | 0.0063 | -0.0051  | 0.0049 |
| Worrier / anxious feelings                                               | European  | 0.1177  | 0.0952 | 1.2358  | 2.17E-01 | 0.0791 | 0.0051 | 1.0030 | 0.0128 | 0.0091   | 0.0070 |
| Cancer code self-reported: squamous cell carcinoma                       | European  | 0.3655  | 0.2971 | 1.2300  | 2.19E-01 | 0.0021 | 0.0013 | 1.0001 | 0.0069 | -0.0019  | 0.0047 |
| Bilateral oophorectomy (both ovaries removed)                            | European  | 0.1600  | 0.1304 | 1.2265  | 2.20E-01 | 0.0213 | 0.0032 | 1.0106 | 0.0076 | 0.0042   | 0.0048 |
| Alcohol intake versus 10 years previously                                | European  | 0.1048  | 0.0855 | 1.2246  | 2.21E-01 | 0.0347 | 0.0024 | 1.0302 | 0.0082 | 0.0087   | 0.0055 |
| Birth weight of first child                                              | European  | -0.0976 | 0.0799 | -1.2216 | 2.22E-01 | 0.1089 | 0.0064 | 1.0228 | 0.0100 | 0.0033   | 0.0058 |
| Number of older siblings                                                 | European  | 0.4466  | 0.3672 | 1.2164  | 2.24E-01 | 0.0058 | 0.0052 | 1.0072 | 0.0063 | 0.0007   | 0.0047 |
| Non-cancer illness code self-reported: bone disorder                     | European  | -0.4345 | 0.3609 | -1.2040 | 2.29E-01 | 0.0015 | 0.0013 | 1.0061 | 0.0064 | 0.0044   | 0.0046 |
| Diagnoses - main ICD10: R11 Nausea and vomiting                          | European  | 0.4963  | 0.4156 | 1.1943  | 2.32E-01 | 0.0012 | 0.0013 | 0.9943 | 0.0062 | 0.0003   | 0.0051 |
| Fracture resulting from simple fall                                      | European  | -0.2169 | 0.1819 | -1.1923 | 2.33E-01 | 0.0547 | 0.0142 | 0.9904 | 0.0063 | 0.0025   | 0.0050 |
| Diagnoses - main ICD10: N40 Hyperplasia of prostate                      | European  | 0.1794  | 0.1507 | 1.1907  | 2.34E-01 | 0.0061 | 0.0015 | 1.0083 | 0.0069 | -0.0065  | 0.0046 |
| Current employment status: Doing unpaid or voluntary work                | European  | -0.1613 | 0.1375 | -1.1724 | 2.41E-01 | 0.0087 | 0.0014 | 1.0117 | 0.0066 | -0.0030  | 0.0048 |
| Duration of moderate activity                                            | European  | 0.1071  | 0.0914 | 1.1718  | 2.41E-01 | 0.0316 | 0.0024 | 1.0105 | 0.0080 | 0.0036   | 0.0050 |

| Trait                                                                            | ethnicity | rg      | SE     | z       | p        | h2_obs | se     | h2_int | se     | gcov_int | se     |
|----------------------------------------------------------------------------------|-----------|---------|--------|---------|----------|--------|--------|--------|--------|----------|--------|
| Pulse rate automated reading                                                     | European  | 0.0670  | 0.0574 | 1.1679  | 2.43E-01 | 0.1528 | 0.0107 | 1.0549 | 0.0299 | 0.0084   | 0.0069 |
| Cough on most days                                                               | European  | 0.1616  | 0.1386 | 1.1662  | 2.44E-01 | 0.0481 | 0.0067 | 0.9985 | 0.0076 | -0.0007  | 0.0054 |
| Non-cancer illness code self-reported: ulcerative colitis                        | European  | -0.1943 | 0.1713 | -1.1343 | 2.57E-01 | 0.0060 | 0.0017 | 1.0099 | 0.0081 | 0.0051   | 0.0053 |
| Started insulin within one year diagnosis of diabetes                            | European  | -0.1772 | 0.1565 | -1.1323 | 2.58E-01 | 0.1667 | 0.0481 | 1.0061 | 0.0085 | 0.0066   | 0.0048 |
| Diagnoses - main ICD10: K62 Other diseases of anus and rectum                    | European  | 0.2075  | 0.1840 | 1.1276  | 2.60E-01 | 0.0050 | 0.0014 | 1.0025 | 0.0066 | -0.0032  | 0.0051 |
| Frequency of travelling from home to job workplace                               | European  | 0.1356  | 0.1208 | 1.1226  | 2.62E-01 | 0.0209 | 0.0027 | 1.0208 | 0.0069 | 0.0024   | 0.0049 |
| Types of transport used (excluding work): Walk                                   | European  | -0.1000 | 0.0905 | -1.1048 | 2.69E-01 | 0.0329 | 0.0024 | 1.0364 | 0.0092 | -0.0062  | 0.0055 |
| Non-cancer illness code self-reported: pneumothorax                              | European  | -0.2526 | 0.2295 | -1.1006 | 2.71E-01 | 0.0030 | 0.0015 | 0.9873 | 0.0073 | -0.0023  | 0.0056 |
| Ever had prostate specific antigen (PSA) test                                    | European  | -0.1231 | 0.1121 | -1.0984 | 2.72E-01 | 0.0336 | 0.0035 | 1.0050 | 0.0076 | 0.0020   | 0.0053 |
| Diagnoses - main ICD10: I21 Acute myocardial infarction                          | European  | 0.1309  | 0.1204 | 1.0874  | 2.77E-01 | 0.0104 | 0.0017 | 1.0054 | 0.0075 | 0.0018   | 0.0047 |
| Number of days/week walked 10+ minutes                                           | European  | 0.0778  | 0.0727 | 1.0699  | 2.85E-01 | 0.0423 | 0.0023 | 1.0098 | 0.0078 | 0.0004   | 0.0045 |
| Diagnoses - main ICD10: H25 Senile cataract                                      | European  | 0.2773  | 0.2598 | 1.0673  | 2.86E-01 | 0.0028 | 0.0014 | 1.0167 | 0.0071 | -0.0035  | 0.0051 |
| Diagnoses - main ICD10: M24 Other specific joint derangements                    | European  | 0.2424  | 0.2278 | 1.0642  | 2.87E-01 | 0.0035 | 0.0013 | 0.9875 | 0.0064 | -0.0021  | 0.0051 |
| Eye problems/disorders: Glaucoma                                                 | European  | 0.1235  | 0.1163 | 1.0622  | 2.88E-01 | 0.0404 | 0.0056 | 1.0154 | 0.0079 | -0.0096  | 0.0048 |
| Current employment status: Retired                                               | European  | -0.1580 | 0.1489 | -1.0612 | 2.89E-01 | 0.0082 | 0.0015 | 1.0179 | 0.0070 | -0.0028  | 0.0048 |
| Diagnoses - main ICD10: I25 Chronic ischaemic heart disease                      | European  | 0.1007  | 0.0950 | 1.0596  | 2.89E-01 | 0.0201 | 0.0023 | 1.0197 | 0.0077 | 0.0024   | 0.0051 |
| Diagnoses - main ICD10: H26 Other cataract                                       | European  | 0.1427  | 0.1352 | 1.0553  | 2.91E-01 | 0.0093 | 0.0017 | 0.9940 | 0.0075 | -0.0009  | 0.0050 |
| Diagnoses - main ICD10: K51 Ulcerative colitis                                   | European  | -0.1894 | 0.1796 | -1.0546 | 2.92E-01 | 0.0048 | 0.0017 | 1.0122 | 0.0069 | 0.0048   | 0.0047 |
| Maximum heart rate during fitness test                                           | European  | -0.1710 | 0.1627 | -1.0511 | 2.93E-01 | 0.0688 | 0.0132 | 1.0157 | 0.0087 | 0.0015   | 0.0054 |
| Birth weight                                                                     | European  | -0.0710 | 0.0679 | -1.0459 | 2.96E-01 | 0.1089 | 0.0062 | 1.0496 | 0.0134 | 0.0009   | 0.0056 |
| Medication for cholesterol blood pressure or diabetes: Blood pressure medication | European  | 0.0844  | 0.0809 | 1.0429  | 2.97E-01 | 0.1037 | 0.0055 | 1.0339 | 0.0101 | -0.0001  | 0.0063 |
| Transport type for commuting to job workplace: Car/motor vehicle                 | European  | 0.1105  | 0.1061 | 1.0412  | 2.98E-01 | 0.0248 | 0.0031 | 1.0228 | 0.0070 | 0.0032   | 0.0046 |
| Impedance of whole body                                                          | European  | -0.0575 | 0.0560 | -1.0275 | 3.04E-01 | 0.2573 | 0.0096 | 1.0933 | 0.0227 | 0.0035   | 0.0077 |
| Diagnoses - main ICD10: R35 Polyuria                                             | European  | 0.3217  | 0.3161 | 1.0177  | 3.09E-01 | 0.0029 | 0.0015 | 0.9986 | 0.0067 | -0.0012  | 0.0056 |
| Types of physical activity in last 4 weeks: Strenuous sports                     | European  | -0.0893 | 0.0886 | -1.0074 | 3.14E-01 | 0.0220 | 0.0018 | 1.0111 | 0.0069 | -0.0076  | 0.0055 |
| Diagnoses - main ICD10: M23 Internal derangement of knee                         | European  | 0.1379  | 0.1370 | 1.0063  | 3.14E-01 | 0.0082 | 0.0018 | 1.0043 | 0.0076 | -0.0028  | 0.0048 |
| Headaches for 3+ months                                                          | European  | -0.1215 | 0.1213 | -1.0017 | 3.17E-01 | 0.0556 | 0.0077 | 1.0071 | 0.0068 | -0.0042  | 0.0050 |
| Doctor diagnosed hayfever or allergic rhinitis                                   | European  | -0.0991 | 0.1000 | -0.9917 | 3.21E-01 | 0.0784 | 0.0095 | 1.0087 | 0.0083 | 0.0076   | 0.0049 |
| Whole body fat-free mass                                                         | European  | -0.0547 | 0.0555 | -0.9855 | 3.24E-01 | 0.2883 | 0.0126 | 1.1342 | 0.0306 | 0.0074   | 0.0077 |
| Diagnoses - main ICD10: D12 Benign neoplasm of colon rectum anus and anal canal  | European  | -0.1287 | 0.1310 | -0.9822 | 3.26E-01 | 0.0085 | 0.0014 | 1.0045 | 0.0066 | 0.0057   | 0.0045 |
| No-wear time bias adjusted acceleration standard deviation                       | European  | -0.0952 | 0.0970 | -0.9814 | 3.26E-01 | 0.0880 | 0.0080 | 1.0030 | 0.0073 | -0.0002  | 0.0046 |
| Whole body water mass                                                            | European  | -0.0546 | 0.0557 | -0.9793 | 3.27E-01 | 0.2883 | 0.0126 | 1.1335 | 0.0303 | 0.0076   | 0.0077 |

| Trait                                                                                          | ethnicity | rg      | SE     | z       | p        | h2_obs | se     | h2_int | se     | gcov_int | se     |
|------------------------------------------------------------------------------------------------|-----------|---------|--------|---------|----------|--------|--------|--------|--------|----------|--------|
| Diagnoses - main ICD10: S09 Other and unspecified injuries of head                             | European  | 0.1808  | 0.1846 | 0.9793  | 3.27E-01 | 0.0041 | 0.0015 | 0.9932 | 0.0065 | -0.0021  | 0.0053 |
| Diagnoses - main ICD10: M67 Other disorders of synovium and tendon                             | European  | 0.2845  | 0.2918 | 0.9750  | 3.30E-01 | 0.0019 | 0.0014 | 1.0009 | 0.0067 | 0.0029   | 0.0048 |
| Illnesses of father: None of the above (group 2)                                               | European  | -0.1504 | 0.1554 | -0.9678 | 3.33E-01 | 0.0096 | 0.0016 | 1.0000 | 0.0071 | -0.0005  | 0.0052 |
| Getting up in morning                                                                          | European  | -0.0619 | 0.0650 | -0.9520 | 3.41E-01 | 0.0680 | 0.0031 | 1.0427 | 0.0109 | 0.0029   | 0.0055 |
| Cancer diagnosed by doctor                                                                     | European  | 0.1458  | 0.1562 | 0.9337  | 3.51E-01 | 0.0067 | 0.0016 | 1.0094 | 0.0067 | -0.0022  | 0.0047 |
| Diagnoses - main ICD10: J33 Nasal polyp                                                        | European  | -0.2176 | 0.2360 | -0.9220 | 3.57E-01 | 0.0032 | 0.0015 | 1.0077 | 0.0071 | 0.0090   | 0.0046 |
| Diagnoses - main ICD10: G56 Mononeuropathies of upper limb                                     | European  | 0.1105  | 0.1201 | 0.9201  | 3.58E-01 | 0.0141 | 0.0019 | 1.0069 | 0.0074 | 0.0029   | 0.0053 |
| Blood clot DVT bronchitis emphysema asthma rhinitis eczema allergy diagnosed by doctor: Asthma | European  | 0.0605  | 0.0661 | 0.9158  | 3.60E-01 | 0.0568 | 0.0058 | 1.0292 | 0.0152 | 0.0075   | 0.0051 |
| Average weekly intake of other alcoholic drinks                                                | European  | 0.2706  | 0.2957 | 0.9152  | 3.60E-01 | 0.0081 | 0.0058 | 1.0033 | 0.0067 | 0.0006   | 0.0046 |
| Mineral and other dietary supplements: Calcium                                                 | European  | -0.1052 | 0.1167 | -0.9009 | 3.68E-01 | 0.0124 | 0.0016 | 0.9984 | 0.0066 | 0.0014   | 0.0049 |
| Fractured/broken bones in last 5 years                                                         | European  | 0.0912  | 0.1021 | 0.8932  | 3.72E-01 | 0.0185 | 0.0021 | 1.0100 | 0.0075 | -0.0041  | 0.0049 |
| Non-cancer illness code self-reported: polio / poliomyelitis                                   | European  | 0.2049  | 0.2297 | 0.8919  | 3.72E-01 | 0.0026 | 0.0013 | 0.9927 | 0.0070 | -0.0025  | 0.0049 |
| Sodium in urine                                                                                | European  | 0.0615  | 0.0692 | 0.8890  | 3.74E-01 | 0.0721 | 0.0031 | 1.0248 | 0.0098 | 0.0041   | 0.0059 |
| Had menopause                                                                                  | European  | 0.1383  | 0.1564 | 0.8842  | 3.77E-01 | 0.0202 | 0.0040 | 1.0044 | 0.0070 | -0.0008  | 0.0054 |
| Diagnoses - main ICD10: F43 Reaction to severe stress and adjustment disorders                 | European  | 0.5203  | 0.5911 | 0.8802  | 3.79E-01 | 0.0008 | 0.0013 | 1.0025 | 0.0055 | -0.0046  | 0.0049 |
| Non-cancer illness code self-reported: asthma                                                  | European  | 0.0593  | 0.0682 | 0.8688  | 3.85E-01 | 0.0575 | 0.0059 | 1.0304 | 0.0153 | 0.0078   | 0.0052 |
| Why stopped smoking: None of the above                                                         | European  | -0.1178 | 0.1373 | -0.8578 | 3.91E-01 | 0.0398 | 0.0058 | 0.9985 | 0.0065 | 0.0068   | 0.0050 |
| Frequency of heavy DIY in last 4 weeks                                                         | European  | 0.1230  | 0.1443 | 0.8522  | 3.94E-01 | 0.0200 | 0.0037 | 1.0104 | 0.0067 | -0.0039  | 0.0047 |
| Non-cancer illness code self-reported: crohn's disease                                         | European  | -0.1601 | 0.1898 | -0.8437 | 3.99E-01 | 0.0051 | 0.0015 | 1.0068 | 0.0067 | 0.0058   | 0.0051 |
| Leg fat-free mass (right)                                                                      | European  | -0.0473 | 0.0563 | -0.8409 | 4.00E-01 | 0.2638 | 0.0112 | 1.1166 | 0.0266 | 0.0072   | 0.0074 |
| Diagnoses - main ICD10: Z47 Other orthopaedic follow-up care                                   | European  | 0.1682  | 0.2007 | 0.8381  | 4.02E-01 | 0.0033 | 0.0013 | 0.9985 | 0.0065 | -0.0025  | 0.0050 |
| Leg predicted mass (right)                                                                     | European  | -0.0466 | 0.0563 | -0.8279 | 4.08E-01 | 0.2634 | 0.0112 | 1.1165 | 0.0265 | 0.0070   | 0.0074 |
| Non-cancer illness code self-reported: malabsorption/coeliac disease                           | European  | 0.1646  | 0.1997 | 0.8239  | 4.10E-01 | 0.0169 | 0.0122 | 0.9941 | 0.0213 | -0.0074  | 0.0044 |
| Heel bone mineral density (BMD) T-score automated (right)                                      | European  | 0.0640  | 0.0780 | 0.8208  | 4.12E-01 | 0.3034 | 0.0371 | 1.0291 | 0.0230 | -0.0024  | 0.0072 |
| Diagnoses - main ICD10: K80 Cholelithiasis                                                     | European  | 0.1159  | 0.1430 | 0.8103  | 4.18E-01 | 0.0096 | 0.0019 | 1.0232 | 0.0090 | 0.0023   | 0.0055 |
| Back pain for 3+ months                                                                        | European  | 0.0912  | 0.1160 | 0.7862  | 4.32E-01 | 0.0400 | 0.0059 | 0.9923 | 0.0070 | -0.0023  | 0.0049 |
| Non-cancer illness code self-reported: kidney stone/ureter stone/bladder stone                 | European  | 0.1138  | 0.1456 | 0.7817  | 4.34E-01 | 0.0090 | 0.0018 | 1.0031 | 0.0080 | -0.0019  | 0.0051 |
| Average weekly fortified wine intake                                                           | European  | -0.1134 | 0.1455 | -0.7792 | 4.36E-01 | 0.0127 | 0.0022 | 1.0174 | 0.0067 | -0.0010  | 0.0053 |
| Fractured bone site(s): Ankle                                                                  | European  | 0.1185  | 0.1526 | 0.7769  | 4.37E-01 | 0.0064 | 0.0015 | 0.9956 | 0.0065 | -0.0014  | 0.0048 |
| Number of children fathered                                                                    | European  | 0.0910  | 0.1180 | 0.7717  | 4.40E-01 | 0.0322 | 0.0037 | 1.0111 | 0.0072 | -0.0039  | 0.0052 |
| Hip circumference                                                                              | European  | 0.0441  | 0.0571 | 0.7715  | 4.40E-01 | 0.2168 | 0.0093 | 1.0841 | 0.0196 | 0.0084   | 0.0072 |

| Trait                                                                                                           | ethnicity | rg      | SE     | z       | p        | h2_obs | se     | h2_int | se     | gcov_int | se     |
|-----------------------------------------------------------------------------------------------------------------|-----------|---------|--------|---------|----------|--------|--------|--------|--------|----------|--------|
| Cancer code self-reported: basal cell carcinoma                                                                 | European  | -0.0974 | 0.1270 | -0.7669 | 4.43E-01 | 0.0104 | 0.0019 | 0.9977 | 0.0080 | 0.0020   | 0.0051 |
| Non-cancer illness code self-reported: osteoporosis                                                             | European  | -0.0926 | 0.1241 | -0.7463 | 4.56E-01 | 0.0147 | 0.0020 | 1.0019 | 0.0080 | 0.0039   | 0.0049 |
| Nap during day                                                                                                  | European  | 0.0479  | 0.0644 | 0.7439  | 4.57E-01 | 0.0805 | 0.0036 | 1.0248 | 0.0104 | 0.0035   | 0.0056 |
| Comparative body size at age 10                                                                                 | European  | 0.0428  | 0.0579 | 0.7382  | 4.60E-01 | 0.1454 | 0.0096 | 1.0183 | 0.0190 | -0.0094  | 0.0059 |
| Vitamin and mineral supplements: Vitamin E                                                                      | European  | -0.1098 | 0.1518 | -0.7235 | 4.69E-01 | 0.0069 | 0.0014 | 0.9932 | 0.0061 | 0.0062   | 0.0050 |
| Cancer code self-reported: malignant melanoma                                                                   | European  | 0.1377  | 0.1909 | 0.7212  | 4.71E-01 | 0.0049 | 0.0015 | 0.9948 | 0.0064 | -0.0027  | 0.0047 |
| Diagnoses - main ICD10: K35 Acute appendicitis                                                                  | European  | -0.1863 | 0.2584 | -0.7210 | 4.71E-01 | 0.0024 | 0.0013 | 1.0038 | 0.0067 | 0.0010   | 0.0046 |
| Diagnoses - main ICD10: O75 Other complications of labour and delivery not elsewhere classified                 | European  | -0.1605 | 0.2234 | -0.7186 | 4.72E-01 | 0.0030 | 0.0012 | 0.9882 | 0.0055 | 0.0050   | 0.0043 |
| Underlying (primary) cause of death: ICD10: E85.4 Organ-limited amyloidosis                                     | European  | -0.2870 | 0.4011 | -0.7156 | 4.74E-01 | 0.0595 | 0.0612 | 0.9999 | 0.0070 | 0.0026   | 0.0051 |
| Distance between home and job workplace                                                                         | European  | 0.1331  | 0.1871 | 0.7117  | 4.77E-01 | 0.0121 | 0.0032 | 1.0057 | 0.0068 | -0.0033  | 0.0050 |
| Diagnoses - main ICD10: Z09 Follow-up examination after treatment for conditions other than malignant neoplasms | European  | 0.1581  | 0.2251 | 0.7023  | 4.83E-01 | 0.0027 | 0.0013 | 1.0023 | 0.0066 | 0.0019   | 0.0045 |
| Non-cancer illness code self-reported: gout                                                                     | European  | 0.0563  | 0.0807 | 0.6979  | 4.85E-01 | 0.0251 | 0.0069 | 0.9903 | 0.0198 | -0.0009  | 0.0049 |
| Light smokers at least 100 smokes in lifetime                                                                   | European  | 0.0604  | 0.0866 | 0.6975  | 4.86E-01 | 0.0770 | 0.0072 | 1.0057 | 0.0074 | 0.0078   | 0.0049 |
| Diagnoses - main ICD10: K76 Other diseases of liver                                                             | European  | 0.1478  | 0.2129 | 0.6942  | 4.88E-01 | 0.0036 | 0.0013 | 0.9935 | 0.0063 | 0.0033   | 0.0047 |
| Non-cancer illness code self-reported: psoriasis                                                                | European  | 0.1190  | 0.1727 | 0.6894  | 4.91E-01 | 0.0071 | 0.0016 | 1.0178 | 0.0085 | 0.0016   | 0.0050 |
| Diagnoses - main ICD10: R55 Syncope and collapse                                                                | European  | 0.1266  | 0.1843 | 0.6869  | 4.92E-01 | 0.0055 | 0.0014 | 1.0078 | 0.0071 | -0.0002  | 0.0049 |
| Vitamin and mineral supplements: Vitamin A                                                                      | European  | -0.1497 | 0.2180 | -0.6865 | 4.92E-01 | 0.0036 | 0.0016 | 1.0037 | 0.0065 | 0.0029   | 0.0052 |
| Basal metabolic rate                                                                                            | European  | -0.0378 | 0.0556 | -0.6795 | 4.97E-01 | 0.2836 | 0.0120 | 1.1211 | 0.0283 | 0.0090   | 0.0077 |
| Types of transport used (excluding work): Public transport                                                      | European  | 0.0714  | 0.1051 | 0.6791  | 4.97E-01 | 0.0220 | 0.0018 | 1.0275 | 0.0069 | -0.0104  | 0.0054 |
| Cancer code self-reported: lung cancer                                                                          | European  | 0.6574  | 0.9685 | 0.6787  | 4.97E-01 | 0.0005 | 0.0012 | 0.9921 | 0.0068 | -0.0040  | 0.0044 |
| Systolic blood pressure automated reading                                                                       | European  | 0.0447  | 0.0665 | 0.6724  | 5.01E-01 | 0.1273 | 0.0058 | 1.0682 | 0.0155 | -0.0022  | 0.0064 |
| Diagnoses - main ICD10: C61 Malignant neoplasm of prostate                                                      | European  | 0.1336  | 0.1993 | 0.6706  | 5.03E-01 | 0.0045 | 0.0014 | 1.0174 | 0.0068 | -0.0066  | 0.0053 |
| Diagnoses - main ICD10: K40 Inguinal hernia                                                                     | European  | -0.0733 | 0.1094 | -0.6699 | 5.03E-01 | 0.0184 | 0.0022 | 0.9920 | 0.0071 | -0.0012  | 0.0053 |
| Why stopped smoking: Health precaution                                                                          | European  | -0.0735 | 0.1102 | -0.6676 | 5.04E-01 | 0.0553 | 0.0064 | 0.9977 | 0.0070 | -0.0048  | 0.0048 |
| Diagnoses - main ICD10: K60 Fissure and fistula of anal and rectal regions                                      | European  | 0.1059  | 0.1591 | 0.6657  | 5.06E-01 | 0.0054 | 0.0014 | 0.9832 | 0.0067 | 0.0012   | 0.0046 |
| Vitamin and mineral supplements: None of the above                                                              | European  | 0.0547  | 0.0835 | 0.6554  | 5.12E-01 | 0.0299 | 0.0018 | 0.9956 | 0.0068 | -0.0048  | 0.0050 |
| Underlying (primary) cause of death: ICD10: J84.1 Other interstitial pulmonary diseases with fibrosis           | European  | -0.1444 | 0.2213 | -0.6526 | 5.14E-01 | 0.1155 | 0.0641 | 0.9910 | 0.0067 | -0.0034  | 0.0045 |
| Worry too long after embarrassment                                                                              | European  | 0.0551  | 0.0846 | 0.6510  | 5.15E-01 | 0.0648 | 0.0034 | 1.0186 | 0.0106 | 0.0049   | 0.0066 |
| Diagnoses - main ICD10: M25 Other joint disorders not elsewhere classified                                      | European  | 0.3364  | 0.5302 | 0.6345  | 5.26E-01 | 0.0008 | 0.0014 | 1.0171 | 0.0067 | 0.0006   | 0.0044 |

| Trait                                                                                                    | ethnicity | rg      | SE     | z       | p        | h2_obs | se     | h2_int | se     | gcov_int | se     |
|----------------------------------------------------------------------------------------------------------|-----------|---------|--------|---------|----------|--------|--------|--------|--------|----------|--------|
| Diagnoses - main ICD10: T84 Complications of internal orthopaedic prosthetic devices implants and grafts | European  | 0.1317  | 0.2079 | 0.6336  | 5.26E-01 | 0.0048 | 0.0017 | 0.9932 | 0.0072 | 0.0081   | 0.0055 |
| Vitamin and mineral supplements: Multivitamins +/- minerals                                              | European  | -0.0573 | 0.0910 | -0.6297 | 5.29E-01 | 0.0237 | 0.0018 | 1.0069 | 0.0077 | 0.0006   | 0.0050 |
| Fractured bone site(s): Arm                                                                              | European  | -0.1309 | 0.2084 | -0.6281 | 5.30E-01 | 0.0051 | 0.0016 | 0.9981 | 0.0075 | 0.0029   | 0.0053 |
| Pulse wave reflection index                                                                              | European  | 0.0682  | 0.1094 | 0.6234  | 5.33E-01 | 0.0542 | 0.0054 | 1.0094 | 0.0077 | -0.0047  | 0.0051 |
| Tinnitus: Yes now most or all of the time                                                                | European  | -0.0749 | 0.1215 | -0.6162 | 5.38E-01 | 0.0337 | 0.0047 | 1.0015 | 0.0064 | 0.0029   | 0.0050 |
| Heel bone mineral density (BMD) T-score automated (left)                                                 | European  | 0.0475  | 0.0780 | 0.6089  | 5.43E-01 | 0.3002 | 0.0366 | 1.0329 | 0.0223 | 0.0014   | 0.0073 |
| Non-cancer illness code self-reported: enlarged prostate                                                 | European  | 0.0914  | 0.1510 | 0.6056  | 5.45E-01 | 0.0064 | 0.0016 | 1.0034 | 0.0070 | -0.0027  | 0.0044 |
| Illnesses of father: Heart disease                                                                       | European  | 0.0539  | 0.0893 | 0.6038  | 5.46E-01 | 0.0299 | 0.0027 | 1.0042 | 0.0090 | -0.0031  | 0.0050 |
| Non-cancer illness code self-reported: hyperthyroidism/thyrotoxicosis                                    | European  | 0.0874  | 0.1466 | 0.5959  | 5.51E-01 | 0.0089 | 0.0025 | 1.0049 | 0.0078 | -0.0051  | 0.0048 |
| Ever had bowel cancer screening                                                                          | European  | -0.0758 | 0.1277 | -0.5935 | 5.53E-01 | 0.0129 | 0.0016 | 1.0201 | 0.0070 | 0.0018   | 0.0051 |
| Diagnoses - main ICD10: N32 Other disorders of bladder                                                   | European  | 0.1188  | 0.2012 | 0.5906  | 5.55E-01 | 0.0040 | 0.0012 | 0.9896 | 0.0059 | -0.0031  | 0.0050 |
| Diagnoses - main ICD10: M70 Soft tissue disorders related to use overuse and pressure                    | European  | -0.1089 | 0.1845 | -0.5903 | 5.55E-01 | 0.0042 | 0.0013 | 0.9816 | 0.0068 | 0.0017   | 0.0047 |
| Leg fat-free mass (left)                                                                                 | European  | -0.0332 | 0.0564 | -0.5885 | 5.56E-01 | 0.2659 | 0.0112 | 1.1098 | 0.0261 | 0.0070   | 0.0075 |
| Cancer code self-reported: breast cancer                                                                 | European  | 0.0796  | 0.1356 | 0.5867  | 5.57E-01 | 0.0099 | 0.0017 | 1.0189 | 0.0079 | -0.0008  | 0.0047 |
| Hair/balding pattern: Pattern 4                                                                          | European  | 0.0325  | 0.0556 | 0.5834  | 5.60E-01 | 0.1671 | 0.0200 | 1.1003 | 0.0255 | -0.0074  | 0.0052 |
| Leg predicted mass (left)                                                                                | European  | -0.0326 | 0.0564 | -0.5793 | 5.62E-01 | 0.2655 | 0.0112 | 1.1097 | 0.0259 | 0.0068   | 0.0075 |
| Potassium in urine                                                                                       | European  | -0.0442 | 0.0765 | -0.5783 | 5.63E-01 | 0.0431 | 0.0023 | 1.0148 | 0.0091 | -0.0046  | 0.0054 |
| Duration of strenuous sports                                                                             | European  | -0.1231 | 0.2163 | -0.5694 | 5.69E-01 | 0.0302 | 0.0138 | 0.9945 | 0.0066 | -0.0023  | 0.0050 |
| Diagnoses - main ICD10: G47 Sleep disorders                                                              | European  | 0.0975  | 0.1734 | 0.5620  | 5.74E-01 | 0.0064 | 0.0015 | 0.9937 | 0.0068 | -0.0026  | 0.0051 |
| Type of tobacco previously smoked: Cigars or pipes                                                       | European  | -0.1206 | 0.2155 | -0.5594 | 5.76E-01 | 0.0117 | 0.0051 | 1.0009 | 0.0060 | -0.0002  | 0.0047 |
| Current employment status: Looking after home and/or family                                              | European  | -0.0941 | 0.1692 | -0.5563 | 5.78E-01 | 0.0059 | 0.0014 | 1.0020 | 0.0067 | -0.0044  | 0.0050 |
| Duration of fitness test                                                                                 | European  | -0.1365 | 0.2499 | -0.5464 | 5.85E-01 | 0.0185 | 0.0089 | 1.0063 | 0.0067 | -0.0010  | 0.0048 |
| Number of incorrect matches in round                                                                     | European  | 0.0352  | 0.0661 | 0.5335  | 5.94E-01 | 0.0540 | 0.0028 | 1.0082 | 0.0090 | 0.0074   | 0.0051 |
| Work/job satisfaction                                                                                    | European  | 0.0648  | 0.1226 | 0.5283  | 5.97E-01 | 0.0481 | 0.0069 | 0.9952 | 0.0068 | -0.0020  | 0.0051 |
| Hair/balding pattern: Pattern 2                                                                          | European  | -0.0460 | 0.0898 | -0.5129 | 6.08E-01 | 0.0511 | 0.0066 | 1.0363 | 0.0137 | 0.0102   | 0.0050 |
| Illnesses of mother: Breast cancer                                                                       | European  | -0.0604 | 0.1195 | -0.5053 | 6.13E-01 | 0.0095 | 0.0019 | 1.0066 | 0.0079 | -0.0017  | 0.0046 |
| Diagnoses - main ICD10: N20 Calculus of kidney and ureter                                                | European  | 0.0754  | 0.1504 | 0.5016  | 6.16E-01 | 0.0078 | 0.0014 | 1.0102 | 0.0070 | 0.0030   | 0.0050 |
| Relative age voice broke                                                                                 | European  | -0.0406 | 0.0822 | -0.4941 | 6.21E-01 | 0.0730 | 0.0055 | 1.0086 | 0.0085 | -0.0050  | 0.0053 |
| Diagnoses - main ICD10: S66 Injury of muscle and tendon at wrist and hand level                          | European  | 0.1394  | 0.2828 | 0.4928  | 6.22E-01 | 0.0018 | 0.0012 | 1.0032 | 0.0065 | -0.0010  | 0.0048 |
| Time spent using computer                                                                                | European  | 0.0330  | 0.0671 | 0.4915  | 6.23E-01 | 0.0957 | 0.0042 | 1.0466 | 0.0098 | -0.0068  | 0.0059 |
| Reproducibility of spirometry measurement using ERS/ATS criteria                                         | European  | -0.0729 | 0.1489 | -0.4894 | 6.25E-01 | 0.0145 | 0.0022 | 1.0073 | 0.0073 | 0.0050   | 0.0058 |



| Trait                                                                                                      | ethnicity | rg      | SE     | z       | p        | h2_obs | se     | h2_int | se     | gcov_int | se     |
|------------------------------------------------------------------------------------------------------------|-----------|---------|--------|---------|----------|--------|--------|--------|--------|----------|--------|
| Arm fat-free mass (right)                                                                                  | European  | -0.0272 | 0.0556 | -0.4893 | 6.25E-01 | 0.2656 | 0.0113 | 1.1065 | 0.0276 | 0.0063   | 0.0075 |
| Friendships satisfaction                                                                                   | European  | 0.0448  | 0.0923 | 0.4847  | 6.28E-01 | 0.0614 | 0.0052 | 1.0000 | 0.0078 | -0.0026  | 0.0052 |
| Diagnoses - main ICD10: C50 Malignant neoplasm of breast                                                   | European  | 0.0658  | 0.1363 | 0.4824  | 6.30E-01 | 0.0086 | 0.0016 | 1.0057 | 0.0080 | 0.0004   | 0.0043 |
| Non-cancer illness code self-reported: uterine fibroids                                                    | European  | -0.0727 | 0.1554 | -0.4678 | 6.40E-01 | 0.0071 | 0.0014 | 1.0074 | 0.0067 | -0.0013  | 0.0050 |
| Non-cancer illness code self-reported: allergy or anaphylactic reaction to drug                            | European  | 0.1826  | 0.3916 | 0.4664  | 6.41E-01 | 0.0010 | 0.0014 | 1.0080 | 0.0065 | -0.0025  | 0.0044 |
| Arm predicted mass (right)                                                                                 | European  | -0.0254 | 0.0552 | -0.4597 | 6.46E-01 | 0.2642 | 0.0113 | 1.1087 | 0.0280 | 0.0069   | 0.0076 |
| Illnesses of father: Prostate cancer                                                                       | European  | -0.0632 | 0.1380 | -0.4584 | 6.47E-01 | 0.0082 | 0.0019 | 1.0136 | 0.0084 | 0.0005   | 0.0050 |
| Illnesses of mother: Alzheimer's disease/dementia                                                          | European  | -0.1079 | 0.2392 | -0.4510 | 6.52E-01 | 0.0036 | 0.0047 | 1.0372 | 0.0356 | -0.0025  | 0.0052 |
| Diagnoses - main ICD10: M72 Fibroblastic disorders                                                         | European  | 0.0593  | 0.1323 | 0.4485  | 6.54E-01 | 0.0103 | 0.0031 | 1.0188 | 0.0215 | 0.0019   | 0.0049 |
| Chest pain or discomfort walking normally                                                                  | European  | 0.0505  | 0.1143 | 0.4422  | 6.58E-01 | 0.0757 | 0.0093 | 1.0076 | 0.0071 | 0.0079   | 0.0050 |
| Eye problems/disorders: Injury or trauma resulting in loss of vision                                       | European  | 1.0942  | 2.4925 | 0.4390  | 6.61E-01 | 0.0012 | 0.0040 | 1.0105 | 0.0062 | -0.0037  | 0.0047 |
| Medication for cholesterol blood pressure or diabetes: Insulin                                             | European  | 0.0928  | 0.2130 | 0.4356  | 6.63E-01 | 0.0094 | 0.0032 | 1.0124 | 0.0070 | 0.0052   | 0.0048 |
| Diagnoses - main ICD10: N81 Female genital prolapse                                                        | European  | 0.0705  | 0.1625 | 0.4341  | 6.64E-01 | 0.0071 | 0.0016 | 1.0249 | 0.0067 | 0.0030   | 0.0053 |
| Diagnoses - main ICD10: S52 Fracture of forearm                                                            | European  | 0.0866  | 0.2049 | 0.4227  | 6.73E-01 | 0.0067 | 0.0018 | 0.9975 | 0.0070 | -0.0027  | 0.0056 |
| Mouth/teeth dental problems: Bleeding gums                                                                 | European  | 0.0434  | 0.1050 | 0.4137  | 6.79E-01 | 0.0222 | 0.0019 | 1.0121 | 0.0080 | 0.0017   | 0.0054 |
| Mouth/teeth dental problems: Mouth ulcers                                                                  | European  | -0.0357 | 0.0872 | -0.4092 | 6.82E-01 | 0.0292 | 0.0037 | 1.0313 | 0.0111 | 0.0012   | 0.0054 |
| Reason for glasses/contact lenses: For just reading/near work as you are getting older (called presbyopia) | European  | -0.0916 | 0.2245 | -0.4079 | 6.83E-01 | 0.0039 | 0.0017 | 1.1364 | 0.0083 | -0.0009  | 0.0052 |
| Non-cancer illness code self-reported: arthritis (nos)                                                     | European  | -0.1170 | 0.2902 | -0.4031 | 6.87E-01 | 0.0019 | 0.0014 | 1.0138 | 0.0066 | -0.0025  | 0.0050 |
| Diagnoses - main ICD10: K52 Other non-infective gastro-enteritis and colitis                               | European  | 0.0742  | 0.1850 | 0.4012  | 6.88E-01 | 0.0048 | 0.0013 | 1.0041 | 0.0060 | 0.0023   | 0.0050 |
| Diagnoses - main ICD10: R14 Flatulence and related conditions                                              | European  | 0.0886  | 0.2214 | 0.4003  | 6.89E-01 | 0.0034 | 0.0013 | 0.9910 | 0.0068 | -0.0002  | 0.0047 |
| Home area population density - urban or rural: Scotland - Large Urban Area                                 | European  | -0.0719 | 0.1800 | -0.3995 | 6.90E-01 | 0.0116 | 0.0032 | 2.1327 | 0.0155 | -0.0060  | 0.0071 |
| Ever taken oral contraceptive pill                                                                         | European  | -0.0475 | 0.1235 | -0.3841 | 7.01E-01 | 0.0196 | 0.0030 | 1.0112 | 0.0073 | 0.0036   | 0.0050 |
| Impedance of leg (left)                                                                                    | European  | -0.0219 | 0.0572 | -0.3831 | 7.02E-01 | 0.2412 | 0.0094 | 1.0813 | 0.0223 | 0.0054   | 0.0073 |
| Diagnoses - main ICD10: F31 Bipolar affective disorder                                                     | European  | 0.0662  | 0.1736 | 0.3811  | 7.03E-01 | 0.0049 | 0.0015 | 0.9869 | 0.0069 | 0.0016   | 0.0046 |
| Pulse rate                                                                                                 | European  | 0.0288  | 0.0764 | 0.3768  | 7.06E-01 | 0.1337 | 0.0122 | 1.0287 | 0.0146 | 0.0095   | 0.0057 |
| Average weekly spirits intake                                                                              | European  | 0.0340  | 0.0906 | 0.3753  | 7.07E-01 | 0.0320 | 0.0028 | 1.0146 | 0.0081 | 0.0065   | 0.0051 |
| Non-cancer illness code self-reported: bladder problem (not cancer)                                        | European  | -0.0869 | 0.2319 | -0.3746 | 7.08E-01 | 0.0024 | 0.0013 | 1.0009 | 0.0070 | -0.0004  | 0.0045 |
| Number of depression episodes                                                                              | European  | 0.0880  | 0.2362 | 0.3724  | 7.10E-01 | 0.0312 | 0.0119 | 1.0057 | 0.0063 | 0.0033   | 0.0054 |
| Number of days/week of vigorous physical activity 10+ minutes                                              | European  | -0.0308 | 0.0836 | -0.3686 | 7.12E-01 | 0.0375 | 0.0023 | 1.0179 | 0.0082 | 0.0004   | 0.0055 |
| Medication for pain relief constipation heartburn: Ibuprofen (e.g. Nurofen)                                | European  | 0.0367  | 0.1003 | 0.3661  | 7.14E-01 | 0.0230 | 0.0018 | 0.9950 | 0.0068 | 0.0085   | 0.0052 |

| Trait                                                                      | ethnicity | rg      | SE     | z       | p        | h2_obs | se     | h2_int | se     | gcov_int | se     |
|----------------------------------------------------------------------------|-----------|---------|--------|---------|----------|--------|--------|--------|--------|----------|--------|
| Diagnoses - main ICD10: J22 Unspecified acute lower respiratory infection  | European  | 0.0840  | 0.2307 | 0.3640  | 7.16E-01 | 0.0031 | 0.0015 | 0.9971 | 0.0073 | 0.0067   | 0.0051 |
| Non-cancer illness code self-reported: pernicious anaemia                  | European  | -0.0785 | 0.2158 | -0.3637 | 7.16E-01 | 0.0034 | 0.0013 | 0.9923 | 0.0066 | 0.0069   | 0.0046 |
| Time spent driving                                                         | European  | 0.0334  | 0.0963 | 0.3465  | 7.29E-01 | 0.0421 | 0.0029 | 1.0028 | 0.0078 | 0.0017   | 0.0054 |
| Non-cancer illness code self-reported: nasal polyps                        | European  | -0.0603 | 0.1771 | -0.3406 | 7.33E-01 | 0.0050 | 0.0016 | 1.0073 | 0.0066 | -0.0033  | 0.0051 |
| Diagnoses - main ICD10: I10 Essential (primary) hypertension               | European  | 0.0888  | 0.2662 | 0.3337  | 7.39E-01 | 0.0024 | 0.0013 | 0.9988 | 0.0063 | 0.0008   | 0.0053 |
| Non-cancer illness code self-reported: iron deficiency anaemia             | European  | 0.0562  | 0.1687 | 0.3331  | 7.39E-01 | 0.0043 | 0.0013 | 0.9921 | 0.0062 | -0.0033  | 0.0046 |
| Arm predicted mass (left)                                                  | European  | -0.0187 | 0.0560 | -0.3330 | 7.39E-01 | 0.2633 | 0.0111 | 1.1175 | 0.0273 | 0.0095   | 0.0076 |
| Diagnoses - main ICD10: R31 Unspecified haematuria                         | European  | -0.0723 | 0.2188 | -0.3306 | 7.41E-01 | 0.0029 | 0.0015 | 1.0103 | 0.0067 | -0.0008  | 0.0045 |
| Used an inhaler for chest within last hour                                 | European  | -0.0577 | 0.1751 | -0.3295 | 7.42E-01 | 0.0041 | 0.0016 | 1.0032 | 0.0062 | 0.0039   | 0.0050 |
| Weight                                                                     | European  | 0.0176  | 0.0543 | 0.3252  | 7.45E-01 | 0.2645 | 0.0103 | 1.0891 | 0.0225 | 0.0104   | 0.0074 |
| Diagnoses - main ICD10: D25 Leiomyoma of uterus                            | European  | 0.0553  | 0.1727 | 0.3204  | 7.49E-01 | 0.0058 | 0.0015 | 0.9938 | 0.0064 | -0.0029  | 0.0049 |
| Vitamin and mineral supplements: Vitamin C                                 | European  | -0.0394 | 0.1249 | -0.3156 | 7.52E-01 | 0.0132 | 0.0017 | 0.9984 | 0.0073 | 0.0037   | 0.0047 |
| Arm fat-free mass (left)                                                   | European  | -0.0177 | 0.0560 | -0.3152 | 7.53E-01 | 0.2644 | 0.0110 | 1.1140 | 0.0268 | 0.0086   | 0.0075 |
| Length of menstrual cycle                                                  | European  | 0.0426  | 0.1368 | 0.3114  | 7.56E-01 | 0.0985 | 0.0204 | 1.0019 | 0.0068 | 0.0012   | 0.0051 |
| Vitamin and mineral supplements: Vitamin B                                 | European  | 0.0500  | 0.1608 | 0.3108  | 7.56E-01 | 0.0072 | 0.0015 | 1.0015 | 0.0068 | 0.0066   | 0.0052 |
| Diagnoses - main ICD10: Z80 Family history of malignant neoplasm           | European  | -0.0994 | 0.3226 | -0.3081 | 7.58E-01 | 0.0013 | 0.0013 | 0.9905 | 0.0062 | -0.0032  | 0.0051 |
| Handedness (chirality/laterality): Left-handed                             | European  | 0.0423  | 0.1383 | 0.3059  | 7.60E-01 | 0.0098 | 0.0017 | 1.0061 | 0.0073 | -0.0014  | 0.0051 |
| Diagnoses - main ICD10: E04 Other non-toxic goitre                         | European  | 0.0525  | 0.1823 | 0.2880  | 7.73E-01 | 0.0049 | 0.0013 | 0.9950 | 0.0064 | -0.0022  | 0.0052 |
| Non-cancer illness code self-reported: back problem                        | European  | 0.0521  | 0.1814 | 0.2875  | 7.74E-01 | 0.0048 | 0.0013 | 1.0070 | 0.0064 | 0.0048   | 0.0049 |
| Length of working week for main job                                        | European  | -0.0371 | 0.1325 | -0.2798 | 7.80E-01 | 0.0192 | 0.0028 | 1.0098 | 0.0066 | 0.0047   | 0.0052 |
| Non-cancer illness code self-reported: ankylosing spondylitis              | European  | -0.0868 | 0.3121 | -0.2782 | 7.81E-01 | 0.0017 | 0.0015 | 1.0029 | 0.0068 | 0.0071   | 0.0050 |
| Eye problems/disorders: Cataract                                           | European  | 0.0412  | 0.1496 | 0.2752  | 7.83E-01 | 0.0226 | 0.0044 | 1.0150 | 0.0071 | 0.0039   | 0.0050 |
| Diagnoses - main ICD10: I80 Phlebitis and thrombophlebitis                 | European  | 0.0432  | 0.1570 | 0.2749  | 7.83E-01 | 0.0080 | 0.0016 | 0.9934 | 0.0086 | -0.0039  | 0.0049 |
| Non-cancer illness code self-reported: diverticular disease/diverticulitis | European  | 0.0293  | 0.1091 | 0.2682  | 7.89E-01 | 0.0125 | 0.0017 | 0.9947 | 0.0072 | 0.0046   | 0.0050 |
| Father still alive                                                         | European  | -0.0425 | 0.1621 | -0.2622 | 7.93E-01 | 0.0063 | 0.0016 | 1.0168 | 0.0068 | 0.0057   | 0.0047 |
| Diagnoses - main ICD10: M20 Acquired deformities of fingers and toes       | European  | 0.0312  | 0.1231 | 0.2536  | 8.00E-01 | 0.0095 | 0.0015 | 1.0002 | 0.0070 | 0.0076   | 0.0050 |
| Diagnoses - main ICD10: I48 Atrial fibrillation and flutter                | European  | -0.0307 | 0.1213 | -0.2528 | 8.00E-01 | 0.0128 | 0.0021 | 1.0116 | 0.0079 | 0.0028   | 0.0050 |
| Mineral and other dietary supplements: Zinc                                | European  | 0.0309  | 0.1246 | 0.2482  | 8.04E-01 | 0.0110 | 0.0015 | 0.9896 | 0.0061 | 0.0055   | 0.0048 |
| Impedance of leg (right)                                                   | European  | -0.0139 | 0.0563 | -0.2467 | 8.05E-01 | 0.2402 | 0.0093 | 1.0916 | 0.0222 | 0.0034   | 0.0072 |
| Morning/evening person (chronotype)                                        | European  | 0.0154  | 0.0630 | 0.2451  | 8.06E-01 | 0.1151 | 0.0041 | 1.0469 | 0.0116 | -0.0018  | 0.0059 |
| Snoring                                                                    | European  | -0.0154 | 0.0660 | -0.2330 | 8.16E-01 | 0.0595 | 0.0028 | 1.0247 | 0.0090 | -0.0021  | 0.0056 |

| Trait                                                                                                                                                  | ethnicity | rg      | SE     | z       | p        | h2_obs | se     | h2_int | se     | gcov_int | se     |
|--------------------------------------------------------------------------------------------------------------------------------------------------------|-----------|---------|--------|---------|----------|--------|--------|--------|--------|----------|--------|
| Most recent bowel cancer screening                                                                                                                     | European  | -0.0546 | 0.2438 | -0.2239 | 8.23E-01 | 0.0115 | 0.0058 | 1.0121 | 0.0063 | 0.0028   | 0.0050 |
| Target heart rate achieved                                                                                                                             | European  | 0.0395  | 0.1783 | 0.2217  | 8.25E-01 | 0.0330 | 0.0107 | 1.0073 | 0.0070 | -0.0062  | 0.0049 |
| Cancer code self-reported: small intestine/small bowel cancer                                                                                          | European  | -0.0895 | 0.4101 | -0.2183 | 8.27E-01 | 0.0012 | 0.0015 | 0.9987 | 0.0073 | 0.0039   | 0.0047 |
| Fractured bone site(s): Wrist                                                                                                                          | European  | 0.0318  | 0.1595 | 0.1993  | 8.42E-01 | 0.0068 | 0.0017 | 1.0063 | 0.0074 | 0.0024   | 0.0052 |
| Diagnoses - main ICD10: B37 Candidiasis                                                                                                                | European  | 0.0849  | 0.4476 | 0.1896  | 8.50E-01 | 0.0008 | 0.0014 | 1.0004 | 0.0068 | -0.0029  | 0.0048 |
| Number of pregnancy terminations                                                                                                                       | European  | 0.0249  | 0.1384 | 0.1802  | 8.57E-01 | 0.0600 | 0.0098 | 1.0078 | 0.0075 | 0.0020   | 0.0053 |
| Non-cancer illness code self-reported: glaucoma                                                                                                        | European  | -0.0204 | 0.1147 | -0.1776 | 8.59E-01 | 0.0116 | 0.0016 | 1.0107 | 0.0080 | -0.0035  | 0.0046 |
| Reason for glasses/contact lenses: For long-sightedness i.e. for distance and near but particularly for near tasks like reading (called hypermetropia) | European  | -0.0193 | 0.1356 | -0.1424 | 8.87E-01 | 0.0098 | 0.0016 | 1.0645 | 0.0074 | 0.0079   | 0.0052 |
| Diagnoses - main ICD10: N19 Unspecified renal failure                                                                                                  | European  | 0.0351  | 0.2481 | 0.1416  | 8.87E-01 | 0.0029 | 0.0013 | 0.9994 | 0.0067 | -0.0038  | 0.0052 |
| Home area population density - urban or rural: England/Wales - Village - less sparse                                                                   | European  | 0.0400  | 0.2988 | 0.1338  | 8.94E-01 | 0.0021 | 0.0014 | 1.0247 | 0.0061 | -0.0018  | 0.0049 |
| Blood clot DVT bronchitis emphysema asthma rhinitis eczema allergy diagnosed by doctor: None of the above                                              | European  | -0.0078 | 0.0626 | -0.1249 | 9.01E-01 | 0.0757 | 0.0068 | 1.0429 | 0.0182 | -0.0077  | 0.0057 |
| Doctor diagnosed asthma                                                                                                                                | European  | 0.0131  | 0.1068 | 0.1226  | 9.02E-01 | 0.0695 | 0.0102 | 0.9987 | 0.0080 | 0.0068   | 0.0051 |
| Frequency of other exercises in last 4 weeks                                                                                                           | European  | -0.0154 | 0.1299 | -0.1185 | 9.06E-01 | 0.0213 | 0.0032 | 0.9975 | 0.0063 | -0.0048  | 0.0048 |
| Non-cancer illness code self-reported: hypertrophic cardiomyopathy (hcm / hocm)                                                                        | European  | -0.0281 | 0.3082 | -0.0913 | 9.27E-01 | 0.0016 | 0.0014 | 1.0014 | 0.0067 | -0.0051  | 0.0050 |
| Diagnoses - main ICD10: K43 Ventral hernia                                                                                                             | European  | 0.0149  | 0.1684 | 0.0883  | 9.30E-01 | 0.0052 | 0.0014 | 0.9942 | 0.0070 | 0.0035   | 0.0048 |
| Number of days/week of moderate physical activity 10+ minutes                                                                                          | European  | 0.0067  | 0.0829 | 0.0809  | 9.36E-01 | 0.0414 | 0.0026 | 1.0150 | 0.0082 | 0.0021   | 0.0055 |
| Diagnoses - main ICD10: S76 Injury of muscle and tendon at hip and thigh level                                                                         | European  | 0.0262  | 0.3268 | 0.0801  | 9.36E-01 | 0.0013 | 0.0013 | 0.9992 | 0.0068 | 0.0010   | 0.0051 |
| Non-cancer illness code self-reported: hypopituitarism                                                                                                 | European  | -0.0237 | 0.3543 | -0.0667 | 9.47E-01 | 0.0015 | 0.0012 | 0.9908 | 0.0063 | 0.0026   | 0.0051 |
| Illnesses of mother: None of the above (group 2)                                                                                                       | European  | -0.0090 | 0.1367 | -0.0659 | 9.47E-01 | 0.0094 | 0.0018 | 1.0000 | 0.0066 | -0.0062  | 0.0043 |
| Non-cancer illness code self-reported: eczema/dermatitis                                                                                               | European  | -0.0082 | 0.1443 | -0.0566 | 9.55E-01 | 0.0085 | 0.0022 | 1.0138 | 0.0076 | 0.0054   | 0.0050 |
| Relative age of first facial hair                                                                                                                      | European  | -0.0036 | 0.0721 | -0.0506 | 9.60E-01 | 0.1254 | 0.0071 | 1.0412 | 0.0115 | -0.0072  | 0.0053 |
| Diagnoses - main ICD10: M16 Coxarthrosis [arthrosis of hip]                                                                                            | European  | 0.0072  | 0.1557 | 0.0464  | 9.63E-01 | 0.0110 | 0.0017 | 1.0080 | 0.0082 | 0.0012   | 0.0054 |
| Illness injury bereavement stress in last 2 years: Serious illness injury or assault of a close relative                                               | European  | 0.0065  | 0.1401 | 0.0461  | 9.63E-01 | 0.0112 | 0.0017 | 1.0104 | 0.0071 | 0.0029   | 0.0053 |
| Diagnoses - main ICD10: K50 Crohn's disease [regional enteritis]                                                                                       | European  | -0.0083 | 0.1803 | -0.0459 | 9.63E-01 | 0.0044 | 0.0014 | 1.0034 | 0.0069 | 0.0028   | 0.0050 |
| Hearing aid user                                                                                                                                       | European  | 0.0053  | 0.1381 | 0.0381  | 9.70E-01 | 0.0173 | 0.0027 | 1.0032 | 0.0068 | -0.0019  | 0.0054 |
| Non-cancer illness code self-reported: varicose veins                                                                                                  | European  | -0.0060 | 0.2000 | -0.0299 | 9.76E-01 | 0.0046 | 0.0014 | 1.0094 | 0.0067 | -0.0011  | 0.0052 |
| Cancer code self-reported: prostate cancer                                                                                                             | European  | 0.0041  | 0.1650 | 0.0251  | 9.80E-01 | 0.0060 | 0.0015 | 1.0152 | 0.0080 | -0.0047  | 0.0051 |
| Non-cancer illness code self-reported: mania/bipolar disorder/manic depression                                                                         | European  | 0.0038  | 0.1819 | 0.0210  | 9.83E-01 | 0.0054 | 0.0014 | 1.0018 | 0.0062 | -0.0019  | 0.0052 |
| Creatinine (enzymatic) in urine                                                                                                                        | European  | 0.0006  | 0.0642 | 0.0089  | 9.93E-01 | 0.0662 | 0.0030 | 1.0179 | 0.0092 | -0.0031  | 0.0056 |

**eTable 10.** Genetic correlations for “propensity” Design

All results from LDhub analyses. Trait= trait against which genetic correlation was calculated. PMID= PMID for publication that belongs to tested summary statistics. rG= genetic correlation. SE= standard error for genetic correlation. Z= Z-score. p= P-value for genetic correlation analysis. ethnicity= sample ethnicity for sample referenced in “Trait” column. h2\_obs= Heritability on the observed scale for sample referenced in “Trait”. se= standard errors for variable reported in the cell to the left (i.e. h2\_obs, ht\_int, gcov\_int). h2\_int= LD score intercept for sample referenced in “Trait”. gcov\_int= cross-trait LD Score regression intercept.

| Trait                                                                    | PMID     | Category       | rg      | SE     | z       | p        | ethnicity | h2_obs | se     | h2_int | se     | gcov_int | se     |
|--------------------------------------------------------------------------|----------|----------------|---------|--------|---------|----------|-----------|--------|--------|--------|--------|----------|--------|
| Neuroticism                                                              | 27089181 | personality    | 0.4491  | 0.0933 | 4.8131  | 1.49E-06 | European  | 0.0864 | 0.0074 | 0.9918 | 0.0165 | -0.0063  | 0.0073 |
| Depressive symptoms                                                      | 27089181 | psychiatric    | 0.4737  | 0.1147 | 4.1302  | 3.63E-05 | European  | 0.0463 | 0.0049 | 1.0074 | 0.0116 | -0.0024  | 0.0071 |
| Subjective well being                                                    | 27089181 | psychiatric    | -0.3329 | 0.0988 | -3.3702 | 8.00E-04 | European  | 0.0257 | 0.0023 | 0.9953 | 0.0104 | -0.0012  | 0.0067 |
| Years of schooling 2016                                                  | 27225129 | education      | 0.2052  | 0.0751 | 2.7311  | 6.30E-03 | European  | 0.1248 | 0.0055 | 0.9398 | 0.0178 | -0.0062  | 0.0090 |
| Major depressive disorder                                                | 22472876 | psychiatric    | 0.5491  | 0.2099 | 2.6153  | 8.90E-03 | European  | 0.1023 | 0.0314 | 1.0412 | 0.0098 | 0.0013   | 0.0075 |
| Attention deficit hyperactivity disorder (GC)                            | 27663945 | psychiatric    | -0.8634 | 0.3803 | -2.2706 | 2.32E-02 | European  | 0.0558 | 0.0320 | 0.9998 | 0.0095 | 0.0107   | 0.0075 |
| Attention deficit hyperactivity disorder (No GC)                         | 27663945 | psychiatric    | -0.8635 | 0.3824 | -2.2581 | 2.39E-02 | European  | 0.0564 | 0.0324 | 1.0146 | 0.0095 | 0.0107   | 0.0076 |
| Fasting insulin main effect                                              | 22581228 | glycemic       | 0.3148  | 0.1413 | 2.2278  | 2.59E-02 | European  | 0.0739 | 0.0121 | 1.0093 | 0.0103 | -0.0073  | 0.0068 |
| Neuroticism                                                              | 24828478 | personality    | 0.5006  | 0.2393 | 2.0916  | 3.65E-02 | European  | 0.0107 | 0.0037 | 1.0232 | 0.0098 | -0.0005  | 0.0068 |
| Intelligence                                                             | 28530673 | cognitive      | 0.1806  | 0.0877 | 2.0604  | 3.94E-02 | European  | 0.2001 | 0.0125 | 0.9999 | 0.0126 | 0.0012   | 0.0078 |
| Total lipids in medium HDL                                               | 27005778 | metabolites    | 0.5740  | 0.2787 | 2.0593  | 3.95E-02 | European  | 0.0708 | 0.0326 | 0.9968 | 0.0120 | -0.0167  | 0.0070 |
| Concentration of medium HDL particles                                    | 27005778 | metabolites    | 0.5511  | 0.2677 | 2.0583  | 3.96E-02 | European  | 0.0749 | 0.0319 | 0.9950 | 0.0113 | -0.0165  | 0.0069 |
| Multiple sclerosis                                                       | 21833088 | autoimmune     | 0.6001  | 0.2934 | 2.0454  | 4.08E-02 | European  | 0.0524 | 0.0332 | 1.0633 | 0.0139 | -0.0019  | 0.0074 |
| Forced expiratory volume in 1 second (FEV1)/ Forced Vital capacity (FVC) | 26635082 | lung function  | -0.2739 | 0.1343 | -2.0394 | 4.14E-02 | European  | 0.1113 | 0.0165 | 0.9830 | 0.0100 | 0.0055   | 0.0072 |
| Cholesterol esters in medium HDL                                         | 27005778 | metabolites    | 0.6154  | 0.3129 | 1.9667  | 4.92E-02 | European  | 0.0603 | 0.0363 | 1.0030 | 0.0140 | -0.0153  | 0.0072 |
| Height_2010                                                              | 20881960 | anthropometric | -0.1533 | 0.0801 | -1.9140 | 5.56E-02 | European  | 0.2874 | 0.0217 | 1.0348 | 0.0323 | 0.0171   | 0.0100 |
| Total cholesterol in medium HDL                                          | 27005778 | metabolites    | 0.5122  | 0.2687 | 1.9062  | 5.66E-02 | European  | 0.0605 | 0.0332 | 1.0018 | 0.0150 | -0.0147  | 0.0071 |
| Free cholesterol in medium HDL                                           | 27005778 | metabolites    | 0.4344  | 0.2353 | 1.8465  | 6.48E-02 | European  | 0.0731 | 0.0307 | 0.9998 | 0.0141 | -0.0152  | 0.0070 |

| Trait                                                                    | PMID     | Category          | rg      | SE     | z       | p        | ethnicity | h2_obs | se     | h2_int | se     | gcov_int | se     |
|--------------------------------------------------------------------------|----------|-------------------|---------|--------|---------|----------|-----------|--------|--------|--------|--------|----------|--------|
| Forced expiratory volume in 1 second (FEV1)/ Forced Vital capacity (FVC) | 21946350 | lung function     | -0.2044 | 0.1116 | -1.8314 | 6.70E-02 | European  | 0.1257 | 0.0158 | 0.9333 | 0.0118 | 0.0148   | 0.0072 |
| HDL cholesterol                                                          | 20686565 | lipids            | 0.1984  | 0.1088 | 1.8242  | 6.81E-02 | European  | 0.1153 | 0.0347 | 1.1050 | 0.0789 | -0.0086  | 0.0083 |
| Phenylalanine                                                            | 27005778 | metabolites       | 0.4473  | 0.2522 | 1.7734  | 7.62E-02 | European  | 0.0567 | 0.0266 | 1.0067 | 0.0105 | -0.0144  | 0.0067 |
| Phospholipids in large HDL                                               | 27005778 | metabolites       | 0.3942  | 0.2230 | 1.7675  | 7.71E-02 | European  | 0.0967 | 0.0412 | 1.0177 | 0.0233 | -0.0131  | 0.0074 |
| Forced Vital capacity (FVC)                                              | 28166213 | lung function     | -0.1559 | 0.0888 | -1.7559 | 7.91E-02 | European  | 0.2694 | 0.0216 | 0.9701 | 0.0140 | 0.0081   | 0.0072 |
| Obesity class 3                                                          | 23563607 | anthropometric    | -0.2597 | 0.1481 | -1.7537 | 7.95E-02 | European  | 0.1153 | 0.0168 | 0.9867 | 0.0130 | 0.0149   | 0.0073 |
| Phospholipids in medium HDL                                              | 27005778 | metabolites       | 0.4035  | 0.2318 | 1.7410  | 8.17E-02 | European  | 0.0764 | 0.0296 | 0.9964 | 0.0126 | -0.0150  | 0.0069 |
| Schizophrenia                                                            | 25056061 | psychiatric       | 0.1352  | 0.0779 | 1.7351  | 8.27E-02 | Mixed     | 0.4031 | 0.0243 | 1.1766 | 0.0231 | 0.0192   | 0.0102 |
| Concentration of large HDL particles                                     | 27005778 | metabolites       | 0.3844  | 0.2216 | 1.7349  | 8.28E-02 | European  | 0.0988 | 0.0417 | 1.0202 | 0.0248 | -0.0119  | 0.0075 |
| Urate                                                                    | 23263486 | other             | -0.1216 | 0.0707 | -1.7214 | 8.52E-02 | European  | 0.1987 | 0.0807 | 0.9154 | 0.0971 | 0.0135   | 0.0081 |
| Neo-openness to experience                                               | 21173776 | personality       | 0.3174  | 0.1846 | 1.7191  | 8.56E-02 | European  | 0.1219 | 0.0326 | 0.9860 | 0.0100 | -0.0008  | 0.0071 |
| Former vs Current smoker                                                 | 20418890 | smoking behaviour | 0.3254  | 0.1948 | 1.6705  | 9.48E-02 | European  | 0.0556 | 0.0133 | 1.0061 | 0.0096 | -0.0096  | 0.0071 |
| Forced expiratory volume in 1 second (FEV1)                              | 28166213 | lung function     | -0.1450 | 0.0876 | -1.6559 | 9.77E-02 | European  | 0.2717 | 0.0232 | 0.9670 | 0.0137 | 0.0068   | 0.0070 |
| Albumin                                                                  | 27005778 | metabolites       | 0.4233  | 0.2568 | 1.6481  | 9.93E-02 | European  | 0.0685 | 0.0295 | 0.9870 | 0.0101 | -0.0053  | 0.0068 |
| Ever vs never smoked                                                     | 20418890 | smoking behaviour | -0.2167 | 0.1320 | -1.6420 | 1.01E-01 | European  | 0.0601 | 0.0079 | 1.0227 | 0.0095 | 0.0144   | 0.0070 |
| Years of schooling 2013                                                  | 23722424 | education         | 0.1673  | 0.1045 | 1.6018  | 1.09E-01 | European  | 0.0848 | 0.0071 | 1.0146 | 0.0124 | 0.0008   | 0.0078 |
| Total lipids in large HDL                                                | 27005778 | metabolites       | 0.3512  | 0.2241 | 1.5673  | 1.17E-01 | European  | 0.0953 | 0.0417 | 1.0223 | 0.0245 | -0.0105  | 0.0075 |
| Insomnia                                                                 | 27992416 | sleeping          | 0.1743  | 0.1132 | 1.5392  | 1.24E-01 | European  | 0.1312 | 0.0140 | 1.0027 | 0.0122 | -0.0020  | 0.0077 |
| HOMA-IR                                                                  | 20081858 | glycemic          | 0.2692  | 0.1826 | 1.4743  | 1.40E-01 | European  | 0.0687 | 0.0151 | 1.0048 | 0.0096 | -0.0034  | 0.0071 |
| Years of schooling (proxy cognitive performance)                         | 25201988 | education         | 0.1505  | 0.1026 | 1.4668  | 1.42E-01 | European  | 0.1062 | 0.0087 | 1.0266 | 0.0128 | 0.0027   | 0.0082 |
| Number of children ever born                                             | 27798627 | reproductive      | -0.1585 | 0.1082 | -1.4644 | 1.43E-01 | European  | 0.0245 | 0.0022 | 0.9774 | 0.0108 | 0.0111   | 0.0067 |
| PGC cross-disorder analysis                                              | 23453885 | psychiatric       | 0.1676  | 0.1216 | 1.3785  | 1.68E-01 | European  | 0.1601 | 0.0158 | 1.0426 | 0.0161 | 0.0121   | 0.0086 |
| Chronotype                                                               | 27494321 | sleeping          | -0.1267 | 0.0931 | -1.3612 | 1.74E-01 | European  | 0.1008 | 0.0072 | 1.0213 | 0.0130 | -0.0027  | 0.0072 |
| Celiac disease                                                           | 20190752 | autoimmune        | 0.2173  | 0.1623 | 1.3388  | 1.81E-01 | European  | 0.2501 | 0.0604 | 1.0930 | 0.0159 | -0.0050  | 0.0100 |
| Glycoprotein acetyls; mainly a1-acid glycoprotein                        | 27005778 | metabolites       | 0.2837  | 0.2124 | 1.3355  | 1.82E-01 | European  | 0.1092 | 0.0348 | 0.9855 | 0.0100 | -0.0116  | 0.0074 |
| Extreme height                                                           | 23563607 | anthropometric    | -0.1509 | 0.1138 | -1.3261 | 1.85E-01 | European  | 1.3193 | 0.1224 | 1.0134 | 0.0227 | 0.0115   | 0.0099 |

| Trait                                                          | PMID     | Category       | rg      | SE     | z       | p        | ethnicity | h2_obs | se     | h2_int | se     | gcov_int | se     |
|----------------------------------------------------------------|----------|----------------|---------|--------|---------|----------|-----------|--------|--------|--------|--------|----------|--------|
| Excessive daytime sleepiness                                   | 27992416 | sleeping       | 0.1678  | 0.1314 | 1.2766  | 2.02E-01 | European  | 0.0485 | 0.0058 | 1.0185 | 0.0103 | 0.0036   | 0.0071 |
| Age of first birth                                             | 27798627 | reproductive   | 0.1135  | 0.0909 | 1.2493  | 2.12E-01 | European  | 0.0635 | 0.0043 | 0.9471 | 0.0123 | -0.0046  | 0.0074 |
| Femoral neck bone mineral density                              | 22504420 | bone           | 0.1332  | 0.1072 | 1.2423  | 2.14E-01 | Mixed     | 0.3019 | 0.0293 | 0.9896 | 0.0145 | -0.0016  | 0.0080 |
| Parents age at death                                           | 27015805 | aging          | 0.2825  | 0.2286 | 1.2359  | 2.17E-01 | European  | 0.0280 | 0.0083 | 1.0196 | 0.0100 | -0.0099  | 0.0079 |
| Cholesterol esters in large HDL                                | 27005778 | metabolites    | 0.2888  | 0.2342 | 1.2333  | 2.18E-01 | European  | 0.0861 | 0.0415 | 1.0237 | 0.0238 | -0.0069  | 0.0076 |
| Mean diameter for LDL particles                                | 27005778 | metabolites    | 0.5431  | 0.4433 | 1.2251  | 2.21E-01 | European  | 0.0394 | 0.0327 | 1.0045 | 0.0175 | -0.0196  | 0.0072 |
| Total cholesterol in large VLDL                                | 27005778 | metabolites    | -0.2573 | 0.2107 | -1.2209 | 2.22E-01 | European  | 0.1033 | 0.0358 | 1.0038 | 0.0120 | 0.0124   | 0.0079 |
| Neo-conscientiousness                                          | 21173776 | personality    | -0.3027 | 0.2480 | -1.2202 | 2.22E-01 | European  | 0.0730 | 0.0370 | 1.0005 | 0.0103 | 0.0034   | 0.0067 |
| Eczema                                                         | 26482879 | autoimmune     | -0.1970 | 0.1620 | -1.2161 | 2.24E-01 | Mixed     | 0.0742 | 0.0182 | 1.0175 | 0.0102 | 0.0099   | 0.0070 |
| HOMA-B                                                         | 20081858 | glycemic       | 0.1956  | 0.1640 | 1.1924  | 2.33E-01 | European  | 0.0786 | 0.0174 | 0.9957 | 0.0107 | 0.0001   | 0.0068 |
| Amyotrophic lateral sclerosis                                  | 27455348 | neurological   | -0.3326 | 0.2879 | -1.1551 | 2.48E-01 | European  | 0.0331 | 0.0152 | 1.0106 | 0.0094 | 0.0083   | 0.0070 |
| Age at Menarche                                                | 25231870 | reproductive   | -0.0924 | 0.0802 | -1.1524 | 2.49E-01 | European  | 0.2165 | 0.0126 | 0.9193 | 0.0203 | -0.0103  | 0.0091 |
| Total cholesterol in HDL                                       | 27005778 | metabolites    | 0.2663  | 0.2315 | 1.1500  | 2.50E-01 | European  | 0.0724 | 0.0404 | 1.0236 | 0.0235 | -0.0076  | 0.0075 |
| Autism spectrum disorder                                       | 0        | psychiatric    | 0.2529  | 0.2257 | 1.1205  | 2.63E-01 | European  | 0.1803 | 0.0667 | 1.0379 | 0.0117 | -0.0015  | 0.0070 |
| Glucose                                                        | 27005778 | metabolites    | 0.1920  | 0.1770 | 1.0847  | 2.78E-01 | European  | 0.1005 | 0.0287 | 0.9895 | 0.0108 | -0.0129  | 0.0070 |
| Obesity class 2                                                | 23563607 | anthropometric | -0.1102 | 0.1030 | -1.0692 | 2.85E-01 | European  | 0.1753 | 0.0144 | 1.0138 | 0.0147 | 0.0081   | 0.0086 |
| Rheumatoid Arthritis                                           | 24390342 | autoimmune     | -0.1064 | 0.1004 | -1.0596 | 2.89E-01 | European  | 0.1547 | 0.0404 | 1.0423 | 0.0403 | 0.0048   | 0.0074 |
| College completion                                             | 23722424 | education      | 0.1131  | 0.1068 | 1.0586  | 2.90E-01 | European  | 0.0797 | 0.0066 | 1.0175 | 0.0119 | 0.0043   | 0.0074 |
| Total cholesterol in large HDL                                 | 27005778 | metabolites    | 0.2509  | 0.2381 | 1.0540  | 2.92E-01 | European  | 0.0705 | 0.0392 | 1.0309 | 0.0251 | -0.0067  | 0.0076 |
| Waist circumference                                            | 25673412 | anthropometric | -0.0855 | 0.0814 | -1.0512 | 2.93E-01 | European  | 0.1208 | 0.0064 | 0.8491 | 0.0138 | 0.0070   | 0.0074 |
| Child birth length                                             | 25281659 | anthropometric | 0.1737  | 0.1659 | 1.0471  | 2.95E-01 | European  | 0.1595 | 0.0297 | 0.9979 | 0.0114 | -0.0072  | 0.0073 |
| Femoral Neck bone mineral density                              | 26367794 | bone           | -0.1275 | 0.1240 | -1.0281 | 3.04E-01 | Mixed     | 0.1236 | 0.0174 | 0.9771 | 0.0129 | 0.0096   | 0.0073 |
| Leptin_adjBMI                                                  | 26833098 | hormone        | 0.1744  | 0.1734 | 1.0055  | 3.15E-01 | European  | 0.0877 | 0.0207 | 1.0104 | 0.0105 | 0.0034   | 0.0072 |
| Forced expiratory volume in 1 second (FEV1)                    | 26635082 | lung function  | -0.1191 | 0.1197 | -0.9949 | 3.20E-01 | European  | 0.1365 | 0.0203 | 0.9919 | 0.0116 | 0.0006   | 0.0075 |
| Free cholesterol in large HDL                                  | 27005778 | metabolites    | 0.2266  | 0.2341 | 0.9682  | 3.33E-01 | European  | 0.0720 | 0.0370 | 1.0331 | 0.0234 | -0.0064  | 0.0077 |
| Age at Menopause                                               | 26414677 | reproductive   | -0.1152 | 0.1199 | -0.9603 | 3.37E-01 | European  | 0.1299 | 0.0217 | 1.0151 | 0.0259 | -0.0033  | 0.0078 |
| Difference in height between adolescence and adulthood; age 14 | 23449627 | anthropometric | -0.1711 | 0.1806 | -0.9471 | 3.44E-01 | European  | 0.4816 | 0.1205 | 0.9787 | 0.0092 | 0.0097   | 0.0065 |
| Platelet count                                                 | 22139419 | haematological | 0.0938  | 0.1000 | 0.9378  | 3.48E-01 | European  | 0.1173 | 0.0146 | 1.0000 | 0.0153 | -0.0037  | 0.0070 |
| Lumbar spine bone mineral density                              | 22504420 | bone           | 0.1050  | 0.1120 | 0.9370  | 3.49E-01 | Mixed     | 0.2571 | 0.0293 | 1.0322 | 0.0164 | -0.0039  | 0.0083 |

| Trait                                                    | PMID     | Category       | rg      | SE     | z       | p        | ethnicity | h2_obs | se     | h2_int | se     | gcov_int | se     |
|----------------------------------------------------------|----------|----------------|---------|--------|---------|----------|-----------|--------|--------|--------|--------|----------|--------|
| Hip circumference                                        | 25673412 | anthropometric | -0.0768 | 0.0829 | -0.9274 | 3.54E-01 | European  | 0.1307 | 0.0071 | 0.8532 | 0.0135 | 0.0028   | 0.0078 |
| Alzheimer's disease                                      | 24162737 | neurological   | 0.1761  | 0.1913 | 0.9203  | 3.57E-01 | European  | 0.0425 | 0.0332 | 1.0796 | 0.0500 | -0.0108  | 0.0079 |
| Fasting proinsulin                                       | 20081858 | glycemic       | -0.1452 | 0.1581 | -0.9182 | 3.59E-01 | European  | 0.2372 | 0.1209 | 0.9717 | 0.0177 | -0.0018  | 0.0062 |
| Attention deficit hyperactivity disorder                 | 20732625 | psychiatric    | -0.6859 | 0.7527 | -0.9112 | 3.62E-01 | European  | 0.0766 | 0.1132 | 1.0299 | 0.0100 | -0.0043  | 0.0068 |
| Total lipids in small HDL                                | 27005778 | metabolites    | 0.2697  | 0.3111 | 0.8670  | 3.86E-01 | European  | 0.0539 | 0.0301 | 1.0056 | 0.0116 | -0.0068  | 0.0073 |
| LDL cholesterol                                          | 20686565 | lipids         | -0.1000 | 0.1166 | -0.8583 | 3.91E-01 | European  | 0.0854 | 0.0366 | 1.1117 | 0.0782 | 0.0071   | 0.0087 |
| Total cholesterol in small LDL                           | 27005778 | metabolites    | -0.2395 | 0.2798 | -0.8560 | 3.92E-01 | European  | 0.0654 | 0.0669 | 1.0267 | 0.0345 | 0.0068   | 0.0083 |
| 18: 2 linoleic acid (LA)                                 | 27005778 | metabolites    | -0.1914 | 0.2252 | -0.8498 | 3.96E-01 | European  | 0.1135 | 0.0647 | 1.0089 | 0.0159 | 0.0061   | 0.0076 |
| Primary sclerosing cholangitis                           | 27992413 | autoimmune     | 0.1400  | 0.1656 | 0.8457  | 3.98E-01 | Mixed     | 0.5082 | 0.2201 | 0.9770 | 0.0265 | 0.0002   | 0.0077 |
| Squamous cell lung cancer                                | 27488534 | cancer         | 0.2064  | 0.2486 | 0.8305  | 4.06E-01 | European  | 0.0313 | 0.0140 | 1.0212 | 0.0099 | -0.0069  | 0.0073 |
| Insomnia                                                 | 28604731 | sleeping       | 0.1163  | 0.1419 | 0.8191  | 4.13E-01 | European  | 0.0463 | 0.0063 | 1.0074 | 0.0114 | 0.0007   | 0.0078 |
| Fathers age at death                                     | 27015805 | aging          | 0.1573  | 0.1945 | 0.8087  | 4.19E-01 | European  | 0.0390 | 0.0080 | 1.0200 | 0.0101 | -0.0096  | 0.0079 |
| Total cholesterol in small VLDL                          | 27005778 | metabolites    | -0.1956 | 0.2439 | -0.8021 | 4.23E-01 | European  | 0.0652 | 0.0399 | 1.0257 | 0.0160 | 0.0076   | 0.0074 |
| Alanine                                                  | 27005778 | metabolites    | 0.1547  | 0.1947 | 0.7949  | 4.27E-01 | European  | 0.0989 | 0.0324 | 1.0048 | 0.0106 | -0.0090  | 0.0075 |
| Serumurate overweight                                    | 25811787 | uric_acid      | -0.0912 | 0.1149 | -0.7935 | 4.28E-01 | European  | 0.6295 | 0.4347 | 0.9544 | 0.0531 | 0.0092   | 0.0067 |
| Lung cancer (squamous cell)                              | 24880342 | cancer         | 0.2242  | 0.2874 | 0.7798  | 4.36E-01 | European  | 0.0404 | 0.0225 | 1.0168 | 0.0094 | -0.0090  | 0.0071 |
| Anorexia Nervosa                                         | 24514567 | psychiatric    | 0.0978  | 0.1260 | 0.7765  | 4.38E-01 | European  | 0.3092 | 0.0365 | 0.9980 | 0.0106 | -0.0005  | 0.0068 |
| Free cholesterol in large VLDL                           | 27005778 | metabolites    | -0.1580 | 0.2036 | -0.7763 | 4.38E-01 | European  | 0.1135 | 0.0372 | 0.9976 | 0.0122 | 0.0086   | 0.0080 |
| 22: 6 docosahexaenoic acid                               | 27005778 | metabolites    | 0.2185  | 0.2822 | 0.7741  | 4.39E-01 | European  | 0.1033 | 0.0382 | 1.0013 | 0.0103 | -0.0029  | 0.0077 |
| Triglycerides in chylomicrons and largest VLDL particles | 27005778 | metabolites    | -0.1490 | 0.1984 | -0.7510 | 4.53E-01 | European  | 0.0977 | 0.0337 | 0.9919 | 0.0115 | 0.0085   | 0.0074 |
| Free cholesterol                                         | 27005778 | metabolites    | -0.2409 | 0.3214 | -0.7494 | 4.54E-01 | European  | 0.0684 | 0.0522 | 1.0253 | 0.0149 | 0.0019   | 0.0077 |
| Phospholipids in small VLDL                              | 27005778 | metabolites    | -0.1470 | 0.1994 | -0.7369 | 4.61E-01 | European  | 0.1000 | 0.0426 | 1.0148 | 0.0144 | 0.0056   | 0.0074 |
| Tyrosine                                                 | 27005778 | metabolites    | 0.1604  | 0.2191 | 0.7318  | 4.64E-01 | European  | 0.0579 | 0.0313 | 1.0121 | 0.0105 | -0.0068  | 0.0069 |
| Free cholesterol in small VLDL                           | 27005778 | metabolites    | -0.1500 | 0.2097 | -0.7150 | 4.75E-01 | European  | 0.0944 | 0.0406 | 1.0157 | 0.0150 | 0.0067   | 0.0076 |
| Apolipoprotein B                                         | 27005778 | metabolites    | -0.1642 | 0.2346 | -0.6997 | 4.84E-01 | European  | 0.0792 | 0.0568 | 1.0189 | 0.0263 | 0.0068   | 0.0076 |
| Serum creatinine                                         | 26831199 | kidney         | -0.0665 | 0.0952 | -0.6991 | 4.85E-01 | Mixed     | 0.1077 | 0.0128 | 0.9792 | 0.0226 | 0.0103   | 0.0084 |
| Serum creatinine (non-diabetes)                          | 26831199 | kidney         | -0.0666 | 0.0962 | -0.6922 | 4.89E-01 | Mixed     | 0.1165 | 0.0143 | 0.9792 | 0.0216 | 0.0084   | 0.0083 |
| Childhood IQ                                             | 23358156 | education      | 0.1111  | 0.1605 | 0.6921  | 4.89E-01 | European  | 0.2757 | 0.0549 | 1.0027 | 0.0124 | 0.0024   | 0.0080 |
| Cholesterol esters in medium LDL                         | 27005778 | metabolites    | -0.1856 | 0.2689 | -0.6902 | 4.90E-01 | European  | 0.0693 | 0.0769 | 1.0240 | 0.0375 | 0.0062   | 0.0081 |
| Triglycerides in very large VLDL                         | 27005778 | metabolites    | -0.1327 | 0.1926 | -0.6887 | 4.91E-01 | European  | 0.1203 | 0.0356 | 0.9851 | 0.0118 | 0.0098   | 0.0076 |
| Extreme waist-to-hip ratio                               | 23563607 | anthropometric | 0.1374  | 0.2001 | 0.6866  | 4.92E-01 | European  | 0.3614 | 0.0620 | 0.9765 | 0.0099 | -0.0076  | 0.0082 |

| Trait                                                                    | PMID     | Category          | rg      | SE     | z       | p        | ethnicity | h2_obs | se     | h2_int | se     | gcov_int | se     |
|--------------------------------------------------------------------------|----------|-------------------|---------|--------|---------|----------|-----------|--------|--------|--------|--------|----------|--------|
| Waist-to-hip ratio                                                       | 25673412 | anthropometric    | -0.0582 | 0.0867 | -0.6710 | 5.02E-01 | European  | 0.1132 | 0.0090 | 0.9305 | 0.0163 | 0.0075   | 0.0074 |
| Infant head circumference                                                | 22504419 | anthropometric    | 0.1306  | 0.1968 | 0.6636  | 5.07E-01 | European  | 0.2287 | 0.0521 | 0.9892 | 0.0092 | -0.0037  | 0.0071 |
| Body fat                                                                 | 26833246 | anthropometric    | 0.0797  | 0.1212 | 0.6574  | 5.11E-01 | Mixed     | 0.1086 | 0.0104 | 0.9039 | 0.0110 | -0.0037  | 0.0075 |
| Total lipids in small LDL                                                | 27005778 | metabolites       | -0.1668 | 0.2550 | -0.6540 | 5.13E-01 | European  | 0.0780 | 0.0667 | 1.0202 | 0.0310 | 0.0072   | 0.0081 |
| Chronic Kidney Disease                                                   | 26831199 | kidney            | 0.1158  | 0.1783 | 0.6498  | 5.16E-01 | Mixed     | 0.0211 | 0.0070 | 1.0128 | 0.0145 | -0.0025  | 0.0072 |
| Bipolar disorder                                                         | 21926972 | psychiatric       | 0.0825  | 0.1275 | 0.6475  | 5.17E-01 | European  | 0.3819 | 0.0471 | 1.0475 | 0.0134 | 0.0165   | 0.0073 |
| Mean diameter for HDL particles                                          | 27005778 | metabolites       | 0.1588  | 0.2465 | 0.6444  | 5.19E-01 | European  | 0.0706 | 0.0414 | 1.0358 | 0.0296 | -0.0043  | 0.0074 |
| Body mass index                                                          | 20935630 | anthropometric    | -0.0543 | 0.0854 | -0.6361 | 5.25E-01 | European  | 0.1887 | 0.0108 | 1.0161 | 0.0175 | 0.0017   | 0.0082 |
| Forced expiratory volume in 1 second (FEV1)/ Forced Vital capacity (FVC) | 28166213 | lung function     | -0.0509 | 0.0803 | -0.6346 | 5.26E-01 | European  | 0.2562 | 0.0271 | 0.9824 | 0.0159 | -0.0022  | 0.0067 |
| Sitting height ratio                                                     | 25865494 | anthropometric    | 0.0879  | 0.1392 | 0.6316  | 5.28E-01 | European  | 0.2171 | 0.0349 | 0.9899 | 0.0120 | -0.0049  | 0.0078 |
| Type 2 Diabetes                                                          | 22885922 | glycemic          | -0.0774 | 0.1229 | -0.6301 | 5.29E-01 | European  | 0.0880 | 0.0100 | 1.0195 | 0.0110 | -0.0008  | 0.0071 |
| Concentration of small LDL particles                                     | 27005778 | metabolites       | -0.1485 | 0.2383 | -0.6232 | 5.33E-01 | European  | 0.0904 | 0.0622 | 1.0169 | 0.0278 | 0.0072   | 0.0082 |
| Total lipids in chylomicrons and largest VLDL particles                  | 27005778 | metabolites       | -0.1204 | 0.1933 | -0.6232 | 5.33E-01 | European  | 0.1205 | 0.0354 | 0.9918 | 0.0116 | 0.0069   | 0.0076 |
| Heart rate                                                               | 23583979 | haematological    | 0.0799  | 0.1288 | 0.6202  | 5.35E-01 | Mixed     | 0.0799 | 0.0115 | 1.0229 | 0.0133 | 0.0048   | 0.0085 |
| Cholesterol esters in large VLDL                                         | 27005778 | metabolites       | -0.1027 | 0.1664 | -0.6174 | 5.37E-01 | European  | 0.1594 | 0.0418 | 0.9880 | 0.0125 | 0.0071   | 0.0076 |
| Phospholipids in very large VLDL                                         | 27005778 | metabolites       | -0.1335 | 0.2167 | -0.6161 | 5.38E-01 | European  | 0.1009 | 0.0344 | 0.9912 | 0.0115 | 0.0074   | 0.0079 |
| Triglycerides in medium VLDL                                             | 27005778 | metabolites       | -0.1351 | 0.2195 | -0.6157 | 5.38E-01 | European  | 0.0764 | 0.0377 | 1.0125 | 0.0116 | 0.0094   | 0.0073 |
| Acetate                                                                  | 27005778 | metabolites       | 0.1410  | 0.2302 | 0.6125  | 5.40E-01 | European  | 0.0473 | 0.0220 | 1.0071 | 0.0101 | 0.0009   | 0.0067 |
| Phospholipids in large VLDL                                              | 27005778 | metabolites       | -0.1253 | 0.2084 | -0.6010 | 5.48E-01 | European  | 0.0946 | 0.0397 | 1.0039 | 0.0129 | 0.0103   | 0.0077 |
| Valine                                                                   | 27005778 | metabolites       | 0.1328  | 0.2209 | 0.6011  | 5.48E-01 | European  | 0.0580 | 0.0247 | 1.0184 | 0.0116 | -0.0045  | 0.0066 |
| Birth weight                                                             | 27680694 | anthropometric    | 0.0568  | 0.0958 | 0.5929  | 5.53E-01 | European  | 0.0940 | 0.0081 | 1.0651 | 0.0159 | -0.0029  | 0.0081 |
| Description of average fatty acid chain length; not actual carbon number | 27005778 | metabolites       | -0.1244 | 0.2099 | -0.5925 | 5.54E-01 | European  | 0.1183 | 0.0414 | 0.9776 | 0.0108 | -0.0010  | 0.0072 |
| Total Cholesterol                                                        | 20686565 | lipids            | -0.0593 | 0.1012 | -0.5857 | 5.58E-01 | European  | 0.1188 | 0.0339 | 1.0729 | 0.0641 | 0.0086   | 0.0095 |
| Child birth weight                                                       | 23202124 | anthropometric    | -0.0906 | 0.1558 | -0.5813 | 5.61E-01 | European  | 0.1187 | 0.0213 | 0.9983 | 0.0089 | -0.0051  | 0.0069 |
| Total lipids in medium LDL                                               | 27005778 | metabolites       | -0.1543 | 0.2669 | -0.5782 | 5.63E-01 | European  | 0.0708 | 0.0768 | 1.0236 | 0.0373 | 0.0051   | 0.0081 |
| Parkinsons disease                                                       | 19915575 | neurological      | -0.0802 | 0.1390 | -0.5768 | 5.64E-01 | European  | 0.3172 | 0.1359 | 1.1357 | 0.0127 | 0.0010   | 0.0070 |
| Cigarettes smoked per day                                                | 20418890 | smoking behaviour | 0.1161  | 0.2050 | 0.5662  | 5.71E-01 | European  | 0.0515 | 0.0179 | 1.0149 | 0.0099 | -0.0005  | 0.0073 |



| Trait                                                       | PMID     | Category        | rg      | SE     | z       | p        | ethnicity | h2_obs | se     | h2_int | se     | gcov_int | se     |
|-------------------------------------------------------------|----------|-----------------|---------|--------|---------|----------|-----------|--------|--------|--------|--------|----------|--------|
| Overweight                                                  | 23563607 | anthropometric  | 0.0482  | 0.0870 | 0.5545  | 5.79E-01 | European  | 0.1097 | 0.0076 | 1.0263 | 0.0161 | -0.0089  | 0.0077 |
| Triglycerides in very large HDL                             | 27005778 | metabolites     | 0.1626  | 0.2934 | 0.5543  | 5.79E-01 | European  | 0.0503 | 0.0443 | 1.0343 | 0.0427 | 0.0003   | 0.0081 |
| Cholesterol esters in large LDL                             | 27005778 | metabolites     | -0.1470 | 0.2658 | -0.5531 | 5.80E-01 | European  | 0.0655 | 0.0799 | 1.0263 | 0.0394 | 0.0043   | 0.0079 |
| Transferrin                                                 | 25352340 | metal           | -0.0828 | 0.1538 | -0.5384 | 5.90E-01 | European  | 0.1503 | 0.0727 | 1.0627 | 0.0310 | 0.0037   | 0.0076 |
| Ratio of bisallylic groups to double bonds                  | 27005778 | metabolites     | -0.0722 | 0.1348 | -0.5356 | 5.92E-01 | European  | 0.3305 | 0.1131 | 0.9695 | 0.0127 | 0.0023   | 0.0070 |
| Leucine                                                     | 27005778 | metabolites     | 0.1556  | 0.2933 | 0.5305  | 5.96E-01 | European  | 0.0466 | 0.0256 | 1.0085 | 0.0107 | -0.0061  | 0.0076 |
| Coronary artery disease                                     | 26343387 | cardiometabolic | 0.0465  | 0.0893 | 0.5210  | 6.02E-01 | Mixed     | 0.0786 | 0.0067 | 1.0615 | 0.0175 | -0.0037  | 0.0081 |
| Free cholesterol in medium VLDL                             | 27005778 | metabolites     | -0.1006 | 0.1943 | -0.5176 | 6.05E-01 | European  | 0.0963 | 0.0417 | 1.0088 | 0.0127 | 0.0065   | 0.0074 |
| Leptin_not_adjBMI                                           | 26833098 | hormone         | 0.0826  | 0.1597 | 0.5175  | 6.05E-01 | European  | 0.0979 | 0.0199 | 0.9975 | 0.0108 | 0.0025   | 0.0071 |
| Triglycerides in large VLDL                                 | 27005778 | metabolites     | -0.1067 | 0.2084 | -0.5120 | 6.09E-01 | European  | 0.0932 | 0.0369 | 1.0013 | 0.0125 | 0.0104   | 0.0076 |
| Phospholipids in medium VLDL                                | 27005778 | metabolites     | -0.1002 | 0.1974 | -0.5075 | 6.12E-01 | European  | 0.0942 | 0.0407 | 1.0099 | 0.0123 | 0.0078   | 0.0073 |
| Concentration of medium LDL particles                       | 27005778 | metabolites     | -0.1335 | 0.2650 | -0.5040 | 6.14E-01 | European  | 0.0706 | 0.0742 | 1.0246 | 0.0359 | 0.0044   | 0.0081 |
| Sleep duration                                              | 27494321 | sleeping        | -0.0525 | 0.1047 | -0.5017 | 6.16E-01 | European  | 0.0512 | 0.0059 | 1.0317 | 0.0118 | -0.0041  | 0.0067 |
| Total cholesterol in medium VLDL                            | 27005778 | metabolites     | -0.0937 | 0.1918 | -0.4886 | 6.25E-01 | European  | 0.1055 | 0.0432 | 1.0079 | 0.0137 | 0.0067   | 0.0074 |
| Total lipids in very large HDL                              | 27005778 | metabolites     | -0.2299 | 0.4809 | -0.4781 | 6.33E-01 | European  | 0.0219 | 0.0366 | 1.0394 | 0.0228 | 0.0087   | 0.0070 |
| Total lipids in small VLDL                                  | 27005778 | metabolites     | -0.0849 | 0.1799 | -0.4721 | 6.37E-01 | European  | 0.1355 | 0.0445 | 1.0033 | 0.0140 | 0.0033   | 0.0075 |
| Phospholipids in very small VLDL                            | 27005778 | metabolites     | 0.1240  | 0.2665 | 0.4655  | 6.42E-01 | European  | 0.0575 | 0.0509 | 1.0316 | 0.0245 | -0.0062  | 0.0075 |
| Concentration of very small VLDL particles                  | 27005778 | metabolites     | 0.0990  | 0.2198 | 0.4504  | 6.52E-01 | European  | 0.0860 | 0.0449 | 1.0227 | 0.0185 | -0.0043  | 0.0071 |
| Concentration of very large HDL particles                   | 27005778 | metabolites     | 0.1780  | 0.3961 | 0.4494  | 6.53E-01 | European  | 0.0288 | 0.0349 | 1.0240 | 0.0223 | 0.0011   | 0.0066 |
| Ulcerative colitis                                          | 26192919 | autoimmune      | 0.0562  | 0.1283 | 0.4382  | 6.61E-01 | European  | 0.2281 | 0.0441 | 1.0720 | 0.0184 | 0.0002   | 0.0070 |
| Primary biliary cirrhosis                                   | 26394269 | autoimmune      | 0.0598  | 0.1370 | 0.4364  | 6.63E-01 | European  | 0.3744 | 0.0758 | 1.0124 | 0.0147 | 0.0028   | 0.0078 |
| Free cholesterol in very large HDL                          | 27005778 | metabolites     | -0.6092 | 1.4051 | -0.4335 | 6.65E-01 | European  | 0.0115 | 0.0313 | 1.0400 | 0.0214 | 0.0117   | 0.0071 |
| Ratio of bisallylic groups to total fatty acids             | 27005778 | metabolites     | -0.0593 | 0.1407 | -0.4217 | 6.73E-01 | European  | 0.3121 | 0.1033 | 0.9765 | 0.0113 | 0.0008   | 0.0069 |
| Citrate                                                     | 27005778 | metabolites     | -0.0851 | 0.2033 | -0.4188 | 6.75E-01 | European  | 0.0730 | 0.0222 | 1.0085 | 0.0094 | -0.0005  | 0.0068 |
| Difference in height between childhood and adulthood; age 8 | 23449627 | anthropometric  | -0.0659 | 0.1590 | -0.4148 | 6.78E-01 | European  | 0.3394 | 0.0626 | 0.9716 | 0.0113 | 0.0012   | 0.0073 |

| Trait                                                    | PMID     | Category          | rg      | SE     | z       | p        | ethnicity | h2_obs | se     | h2_int | se     | gcov_int | se     |
|----------------------------------------------------------|----------|-------------------|---------|--------|---------|----------|-----------|--------|--------|--------|--------|----------|--------|
| Concentration of small VLDL particles                    | 27005778 | metabolites       | -0.0712 | 0.1745 | -0.4083 | 6.83E-01 | European  | 0.1448 | 0.0451 | 1.0003 | 0.0137 | 0.0031   | 0.0075 |
| Triglycerides in small VLDL                              | 27005778 | metabolites       | -0.0739 | 0.1852 | -0.3989 | 6.90E-01 | European  | 0.1175 | 0.0441 | 1.0036 | 0.0138 | 0.0042   | 0.0076 |
| Mothers age at death                                     | 27015805 | aging             | -0.0560 | 0.1453 | -0.3857 | 7.00E-01 | European  | 0.0478 | 0.0081 | 0.9945 | 0.0102 | 0.0001   | 0.0067 |
| Average number of double bonds in a fatty acid chain     | 27005778 | metabolites       | -0.0595 | 0.1555 | -0.3829 | 7.02E-01 | European  | 0.1775 | 0.0565 | 1.0022 | 0.0117 | 0.0020   | 0.0065 |
| Ferritin                                                 | 25352340 | metal             | -0.0833 | 0.2191 | -0.3801 | 7.04E-01 | European  | 0.0776 | 0.0343 | 1.0362 | 0.0130 | -0.0035  | 0.0077 |
| Triglycerides in IDL                                     | 27005778 | metabolites       | 0.0772  | 0.2046 | 0.3774  | 7.06E-01 | European  | 0.0919 | 0.0464 | 1.0224 | 0.0229 | -0.0056  | 0.0073 |
| Lung adenocarcinoma                                      | 27488534 | cancer            | 0.1022  | 0.2785 | 0.3671  | 7.14E-01 | European  | 0.0201 | 0.0135 | 1.0339 | 0.0094 | -0.0037  | 0.0070 |
| Crohn's disease                                          | 26192919 | autoimmune        | -0.0362 | 0.0994 | -0.3644 | 7.16E-01 | European  | 0.4704 | 0.0735 | 1.0463 | 0.0204 | 0.0056   | 0.0077 |
| Serum total triglycerides                                | 27005778 | metabolites       | -0.0657 | 0.1810 | -0.3633 | 7.16E-01 | European  | 0.1259 | 0.0445 | 0.9997 | 0.0137 | 0.0052   | 0.0078 |
| Omega-9 and saturated fatty acids                        | 27005778 | metabolites       | 0.1266  | 0.3530 | 0.3586  | 7.20E-01 | European  | 0.0768 | 0.0520 | 1.0013 | 0.0120 | -0.0003  | 0.0080 |
| Childhood obesity                                        | 22484627 | anthropometric    | -0.0451 | 0.1282 | -0.3518 | 7.25E-01 | European  | 0.4003 | 0.0478 | 0.9307 | 0.0111 | -0.0030  | 0.0078 |
| Total lipids in large LDL                                | 27005778 | metabolites       | -0.0943 | 0.2708 | -0.3484 | 7.28E-01 | European  | 0.0620 | 0.0802 | 1.0291 | 0.0397 | 0.0020   | 0.0078 |
| Free cholesterol to esterified cholesterol ratio         | 27005778 | metabolites       | -0.1371 | 0.3940 | -0.3479 | 7.28E-01 | European  | 0.0471 | 0.0682 | 1.0202 | 0.0196 | 0.0016   | 0.0075 |
| Adiponectin                                              | 22479202 | cardiometabolic   | 0.0529  | 0.1605 | 0.3294  | 7.42E-01 | Mixed     | 0.1108 | 0.0341 | 1.0295 | 0.0195 | 0.0029   | 0.0069 |
| Phospholipids in chylomicrons and largest VLDL particles | 27005778 | metabolites       | -0.0646 | 0.1963 | -0.3293 | 7.42E-01 | European  | 0.1046 | 0.0322 | 0.9828 | 0.0111 | 0.0064   | 0.0075 |
| Concentration of chylomicrons and largest VLDL particles | 27005778 | metabolites       | -0.0695 | 0.2245 | -0.3097 | 7.57E-01 | European  | 0.0830 | 0.0340 | 1.0013 | 0.0109 | 0.0044   | 0.0071 |
| Asthma                                                   | 17611496 | autoimmune        | -0.0424 | 0.1381 | -0.3071 | 7.59E-01 | European  | 0.1234 | 0.0328 | 1.0081 | 0.0134 | 0.0005   | 0.0079 |
| Concentration of IDL particles                           | 27005778 | metabolites       | 0.0846  | 0.2818 | 0.3002  | 7.64E-01 | European  | 0.0539 | 0.0615 | 1.0341 | 0.0303 | -0.0041  | 0.0075 |
| Triglycerides                                            | 20686565 | lipids            | -0.0264 | 0.0882 | -0.2990 | 7.65E-01 | European  | 0.1831 | 0.0397 | 0.9609 | 0.0300 | 0.0048   | 0.0082 |
| Lung cancer (all)                                        | 24880342 | cancer            | 0.0512  | 0.1715 | 0.2986  | 7.65E-01 | European  | 0.1299 | 0.0348 | 1.0113 | 0.0114 | -0.0040  | 0.0076 |
| Acetoacetate                                             | 27005778 | metabolites       | -0.0690 | 0.2334 | -0.2956 | 7.68E-01 | European  | 0.0824 | 0.0353 | 0.9721 | 0.0111 | 0.0025   | 0.0070 |
| Age of smoking initiation                                | 20418890 | smoking behaviour | -0.0644 | 0.2239 | -0.2876 | 7.74E-01 | European  | 0.0486 | 0.0224 | 1.0065 | 0.0096 | 0.0054   | 0.0065 |
| Forced Vital capacity (FVC)                              | 26635082 | lung function     | 0.0368  | 0.1282 | 0.2867  | 7.74E-01 | European  | 0.1475 | 0.0194 | 0.9801 | 0.0113 | -0.0043  | 0.0077 |
| Height; Females at age 10 and males at age 12            | 23449627 | anthropometric    | -0.0316 | 0.1104 | -0.2860 | 7.75E-01 | European  | 0.4402 | 0.0542 | 0.9518 | 0.0120 | 0.0074   | 0.0071 |
| Serum cystatin c                                         | 26831199 | kidney            | -0.0325 | 0.1161 | -0.2800 | 7.80E-01 | Mixed     | 0.1759 | 0.0699 | 0.9595 | 0.0167 | 0.0037   | 0.0071 |
| Extreme BMI                                              | 23563607 | anthropometric    | -0.0343 | 0.1240 | -0.2766 | 7.82E-01 | European  | 0.6888 | 0.0643 | 1.0337 | 0.0145 | -0.0029  | 0.0088 |
| Total cholesterol in large LDL                           | 27005778 | metabolites       | -0.0759 | 0.2799 | -0.2711 | 7.86E-01 | European  | 0.0492 | 0.0726 | 1.0328 | 0.0410 | 0.0045   | 0.0077 |

| Trait                                                | PMID     | Category       | rg      | SE     | z       | p        | ethnicity | h2_obs | se     | h2_int | se     | gcov_int | se     |
|------------------------------------------------------|----------|----------------|---------|--------|---------|----------|-----------|--------|--------|--------|--------|----------|--------|
| Total lipids in very large VLDL                      | 27005778 | metabolites    | -0.0490 | 0.1892 | -0.2591 | 7.96E-01 | European  | 0.1353 | 0.0361 | 0.9833 | 0.0117 | 0.0045   | 0.0076 |
| Inflammatory Bowel Disease (Euro)                    | 26192919 | autoimmune     | 0.0259  | 0.1026 | 0.2525  | 8.01E-01 | European  | 0.3055 | 0.0465 | 1.0836 | 0.0214 | 0.0010   | 0.0079 |
| Concentration of large LDL particles                 | 27005778 | metabolites    | -0.0683 | 0.2708 | -0.2522 | 8.01E-01 | European  | 0.0617 | 0.0776 | 1.0306 | 0.0383 | 0.0010   | 0.0078 |
| Total lipids in very small VLDL                      | 27005778 | metabolites    | 0.0544  | 0.2243 | 0.2424  | 8.09E-01 | European  | 0.0795 | 0.0450 | 1.0267 | 0.0189 | -0.0036  | 0.0072 |
| Forced expiratory volume in 1 second (FEV1)          | 21946350 | lung function  | -0.0314 | 0.1356 | -0.2317 | 8.17E-01 | European  | 0.1730 | 0.0280 | 0.8771 | 0.0193 | -0.0175  | 0.0110 |
| Mean platelet volume                                 | 22139419 | haematological | -0.0315 | 0.1360 | -0.2313 | 8.17E-01 | European  | 0.3159 | 0.0639 | 0.9916 | 0.0185 | -0.0042  | 0.0076 |
| Isoleucine                                           | 27005778 | metabolites    | 0.0474  | 0.2334 | 0.2032  | 8.39E-01 | European  | 0.0633 | 0.0294 | 0.9975 | 0.0108 | -0.0004  | 0.0074 |
| Free cholesterol in large LDL                        | 27005778 | metabolites    | -0.0566 | 0.2852 | -0.1984 | 8.43E-01 | European  | 0.0468 | 0.0758 | 1.0353 | 0.0429 | 0.0029   | 0.0076 |
| Total cholesterol in medium LDL                      | 27005778 | metabolites    | -0.0515 | 0.2685 | -0.1917 | 8.48E-01 | European  | 0.0605 | 0.0730 | 1.0263 | 0.0402 | 0.0030   | 0.0080 |
| Cholesterol esters in medium VLDL                    | 27005778 | metabolites    | -0.0332 | 0.1778 | -0.1869 | 8.52E-01 | European  | 0.1361 | 0.0455 | 0.9990 | 0.0136 | 0.0041   | 0.0075 |
| Serum total cholesterol                              | 27005778 | metabolites    | -0.0486 | 0.2718 | -0.1789 | 8.58E-01 | European  | 0.0612 | 0.0544 | 1.0292 | 0.0257 | 0.0055   | 0.0079 |
| Total lipids in IDL                                  | 27005778 | metabolites    | 0.0472  | 0.2772 | 0.1703  | 8.65E-01 | European  | 0.0547 | 0.0651 | 1.0344 | 0.0322 | -0.0032  | 0.0075 |
| Creatinine                                           | 27005778 | metabolites    | 0.0268  | 0.1606 | 0.1668  | 8.68E-01 | European  | 0.1213 | 0.0315 | 1.0126 | 0.0112 | -0.0004  | 0.0070 |
| Total lipids in large VLDL                           | 27005778 | metabolites    | -0.0320 | 0.1952 | -0.1641 | 8.70E-01 | European  | 0.1133 | 0.0386 | 0.9994 | 0.0124 | 0.0069   | 0.0075 |
| 2hr glucose adjusted for BMI                         | 20081857 | glycemic       | 0.0352  | 0.2236 | 0.1575  | 8.75E-01 | European  | 0.1238 | 0.0402 | 0.9828 | 0.0098 | 0.0019   | 0.0073 |
| Urinary albumin-to-creatinine ratio (non-diabetes)   | 26631737 | kidney         | 0.0256  | 0.1696 | 0.1507  | 8.80E-01 | European  | 0.0485 | 0.0124 | 0.9989 | 0.0093 | 0.0019   | 0.0064 |
| Lung cancer                                          | 27488534 | cancer         | 0.0219  | 0.1504 | 0.1459  | 8.84E-01 | European  | 0.3173 | 0.0783 | 1.0184 | 0.0109 | 0.0001   | 0.0075 |
| Concentration of large VLDL particles                | 27005778 | metabolites    | -0.0278 | 0.1941 | -0.1433 | 8.86E-01 | European  | 0.1233 | 0.0433 | 0.9821 | 0.0133 | 0.0046   | 0.0077 |
| Mono-unsaturated fatty acids                         | 27005778 | metabolites    | 0.0394  | 0.2786 | 0.1413  | 8.88E-01 | European  | 0.1003 | 0.0482 | 0.9922 | 0.0114 | 0.0013   | 0.0076 |
| Apolipoprotein A-I                                   | 27005778 | metabolites    | 0.0353  | 0.2527 | 0.1397  | 8.89E-01 | European  | 0.0802 | 0.0431 | 1.0068 | 0.0203 | 0.0009   | 0.0076 |
| Total cholesterol in LDL                             | 27005778 | metabolites    | -0.0385 | 0.2765 | -0.1394 | 8.89E-01 | European  | 0.0586 | 0.0792 | 1.0287 | 0.0436 | 0.0027   | 0.0079 |
| Urinary albumin-to-creatinine ratio                  | 26631737 | kidney         | 0.0218  | 0.1643 | 0.1329  | 8.94E-01 | European  | 0.0422 | 0.0101 | 1.0005 | 0.0090 | -0.0011  | 0.0065 |
| Phospholipids in IDL                                 | 27005778 | metabolites    | 0.0440  | 0.3325 | 0.1324  | 8.95E-01 | European  | 0.0356 | 0.0602 | 1.0402 | 0.0332 | -0.0011  | 0.0073 |
| Free cholesterol in IDL                              | 27005778 | metabolites    | -0.0330 | 0.2808 | -0.1175 | 9.07E-01 | European  | 0.0466 | 0.0626 | 1.0387 | 0.0348 | 0.0006   | 0.0073 |
| Omega-3 fatty acids                                  | 27005778 | metabolites    | 0.0280  | 0.2431 | 0.1153  | 9.08E-01 | European  | 0.1306 | 0.0489 | 0.9956 | 0.0122 | 0.0058   | 0.0077 |
| Glutamine                                            | 27005778 | metabolites    | -0.0259 | 0.2357 | -0.1100 | 9.12E-01 | European  | 0.0508 | 0.0251 | 1.0248 | 0.0114 | -0.0006  | 0.0065 |
| Average number of methylene groups per a double bond | 27005778 | metabolites    | 0.0167  | 0.1575 | 0.1062  | 9.15E-01 | European  | 0.2190 | 0.0827 | 0.9920 | 0.0118 | -0.0011  | 0.0065 |

| Trait                                      | PMID     | Category       | rg      | SE     | z       | p        | ethnicity | h2_obs | se     | h2_int | se     | gcov_int | se     |
|--------------------------------------------|----------|----------------|---------|--------|---------|----------|-----------|--------|--------|--------|--------|----------|--------|
| Concentration of medium VLDL particles     | 27005778 | metabolites    | -0.0194 | 0.1894 | -0.1024 | 9.18E-01 | European  | 0.1238 | 0.0456 | 0.9976 | 0.0133 | 0.0029   | 0.0075 |
| Forearm Bone mineral density               | 26367794 | bone           | -0.0328 | 0.3207 | -0.1022 | 9.19E-01 | Mixed     | 0.0599 | 0.0522 | 1.0181 | 0.0100 | -0.0006  | 0.0066 |
| Total lipids in medium VLDL                | 27005778 | metabolites    | -0.0182 | 0.1854 | -0.0984 | 9.22E-01 | European  | 0.1246 | 0.0433 | 0.9982 | 0.0122 | 0.0041   | 0.0074 |
| Triglycerides in very small VLDL           | 27005778 | metabolites    | 0.0162  | 0.1766 | 0.0920  | 9.27E-01 | European  | 0.1359 | 0.0465 | 1.0063 | 0.0157 | -0.0021  | 0.0074 |
| Systemic lupus erythematosus               | 26502338 | autoimmune     | 0.0123  | 0.1361 | 0.0906  | 9.28E-01 | European  | 0.3671 | 0.0669 | 1.1171 | 0.0172 | 0.0100   | 0.0076 |
| Obesity class 1                            | 23563607 | anthropometric | 0.0077  | 0.0860 | 0.0891  | 9.29E-01 | European  | 0.2091 | 0.0137 | 1.0315 | 0.0177 | 0.0016   | 0.0084 |
| Concentration of very large VLDL particles | 27005778 | metabolites    | 0.0165  | 0.1962 | 0.0841  | 9.33E-01 | European  | 0.1174 | 0.0360 | 0.9895 | 0.0114 | 0.0012   | 0.0079 |
| Triglycerides in small HDL                 | 27005778 | metabolites    | -0.0203 | 0.2516 | -0.0806 | 9.36E-01 | European  | 0.0540 | 0.0364 | 1.0118 | 0.0145 | 0.0013   | 0.0070 |
| Phospholipids in medium LDL                | 27005778 | metabolites    | -0.0192 | 0.2508 | -0.0765 | 9.39E-01 | European  | 0.0702 | 0.0640 | 1.0186 | 0.0343 | 0.0021   | 0.0080 |
| Mean diameter for VLDL particles           | 27005778 | metabolites    | -0.0113 | 0.2024 | -0.0557 | 9.56E-01 | European  | 0.1115 | 0.0446 | 1.0057 | 0.0146 | 0.0023   | 0.0075 |
| Phospholipids in large LDL                 | 27005778 | metabolites    | 0.0162  | 0.2969 | 0.0544  | 9.57E-01 | European  | 0.0451 | 0.0681 | 1.0348 | 0.0383 | 0.0019   | 0.0076 |
| HbA1C                                      | 20858683 | glycemic       | 0.0093  | 0.1791 | 0.0520  | 9.59E-01 | European  | 0.0514 | 0.0151 | 1.0156 | 0.0117 | -0.0033  | 0.0066 |
| Total cholesterol in IDL                   | 27005778 | metabolites    | -0.0119 | 0.2674 | -0.0445 | 9.65E-01 | European  | 0.0570 | 0.0701 | 1.0330 | 0.0346 | -0.0011  | 0.0075 |
| Fasting glucose main effect                | 22581228 | glycemic       | -0.0035 | 0.1171 | -0.0300 | 9.76E-01 | European  | 0.0990 | 0.0245 | 0.9977 | 0.0183 | 0.0007   | 0.0073 |
| Phospholipids in very large HDL            | 27005778 | metabolites    | 0.0011  | 0.2879 | 0.0039  | 9.97E-01 | European  | 0.0472 | 0.0381 | 1.0337 | 0.0256 | 0.0041   | 0.0070 |
| Lumbar Spine bone mineral density          | 26367794 | bone           | 0.0002  | 0.1234 | 0.0017  | 9.99E-01 | Mixed     | 0.1155 | 0.0175 | 0.9948 | 0.0125 | -0.0057  | 0.0075 |

**eTable 11.** Genetic correlations for “propensity” Design (UKBB traits)

All results from LDhub analyses. Trait= trait against which genetic correlation was calculated. ethnicity= sample ethnicity for sample referenced in “Trait” column. rG= genetic correlation. SE= standard error for genetic correlation. z= Z-score. p= P-value for genetic correlation analysis. h2\_obs= Heritability on the observed scale for sample referenced in “Trait”. se= standard errors for variable reported in the cell to the left (i.e. h2\_obs, ht\_int, gcov\_int). h2\_int= LD score intercept for sample referenced in “Trait”. gcov\_int= cross-trait LD Score regression intercept.

| Trait                                                                                            | ethnicity | rg      | SE     | z       | p        | h2_obs | se     | h2_int | se     | gcov_int | se     |
|--------------------------------------------------------------------------------------------------|-----------|---------|--------|---------|----------|--------|--------|--------|--------|----------|--------|
| Seen doctor (GP) for nerves anxiety tension or depression                                        | European  | 0.6269  | 0.1050 | 5.9683  | 2.40E-09 | 0.0594 | 0.0033 | 1.0342 | 0.0149 | -0.0101  | 0.0089 |
| Seen a psychiatrist for nerves anxiety tension or depression                                     | European  | 0.6770  | 0.1259 | 5.3759  | 7.62E-08 | 0.0292 | 0.0026 | 1.0222 | 0.0126 | -0.0075  | 0.0085 |
| Frequency of depressed mood in last 2 weeks                                                      | European  | 0.4922  | 0.1009 | 4.8776  | 1.07E-06 | 0.0402 | 0.0035 | 1.0288 | 0.0143 | -0.0034  | 0.0078 |
| Neuroticism score                                                                                | European  | 0.3667  | 0.0760 | 4.8245  | 1.40E-06 | 0.1181 | 0.0064 | 1.0206 | 0.0196 | 0.0026   | 0.0075 |
| Nervous feelings                                                                                 | European  | 0.4137  | 0.0915 | 4.5236  | 6.08E-06 | 0.0656 | 0.0045 | 1.0188 | 0.0184 | -0.0008  | 0.0077 |
| Getting up in morning                                                                            | European  | -0.3809 | 0.0858 | -4.4376 | 9.10E-06 | 0.0688 | 0.0035 | 1.0412 | 0.0166 | 0.0149   | 0.0075 |
| Loneliness isolation                                                                             | European  | 0.4284  | 0.1019 | 4.2025  | 2.64E-05 | 0.0364 | 0.0028 | 1.0384 | 0.0120 | -0.0053  | 0.0075 |
| Guilty feelings                                                                                  | European  | 0.3578  | 0.0858 | 4.1690  | 3.06E-05 | 0.0502 | 0.0031 | 1.0177 | 0.0139 | -0.0011  | 0.0071 |
| Worrier / anxious feelings                                                                       | European  | 0.3278  | 0.0813 | 4.0307  | 5.56E-05 | 0.0786 | 0.0050 | 1.0068 | 0.0194 | 0.0042   | 0.0081 |
| Miserableness                                                                                    | European  | 0.3555  | 0.0892 | 3.9835  | 6.79E-05 | 0.0634 | 0.0039 | 1.0230 | 0.0159 | 0.0041   | 0.0079 |
| Non-cancer illness code self-reported: depression                                                | European  | 0.5331  | 0.1349 | 3.9522  | 7.74E-05 | 0.0186 | 0.0021 | 1.0010 | 0.0112 | -0.0049  | 0.0076 |
| Tense / highly strung                                                                            | European  | 0.3557  | 0.0902 | 3.9424  | 8.07E-05 | 0.0572 | 0.0037 | 0.9989 | 0.0156 | -0.0084  | 0.0079 |
| Happiness                                                                                        | European  | 0.4854  | 0.1248 | 3.8909  | 9.99E-05 | 0.0573 | 0.0062 | 1.0166 | 0.0109 | 0.0001   | 0.0074 |
| Frequency of tiredness / lethargy in last 2 weeks                                                | European  | 0.3347  | 0.0878 | 3.8128  | 1.00E-04 | 0.0573 | 0.0036 | 1.0426 | 0.0149 | -0.0040  | 0.0080 |
| Mean time to correctly identify matches                                                          | European  | 0.2971  | 0.0777 | 3.8258  | 1.00E-04 | 0.0716 | 0.0033 | 1.0463 | 0.0146 | -0.0075  | 0.0085 |
| Peak expiratory flow (PEF)                                                                       | European  | -0.2981 | 0.0796 | -3.7428 | 2.00E-04 | 0.0906 | 0.0060 | 1.0624 | 0.0202 | 0.0220   | 0.0086 |
| Illnesses of siblings: Severe depression                                                         | European  | 0.6852  | 0.1817 | 3.7714  | 2.00E-04 | 0.0138 | 0.0023 | 1.0079 | 0.0099 | -0.0120  | 0.0074 |
| Friendships satisfaction                                                                         | European  | 0.4311  | 0.1204 | 3.5812  | 3.00E-04 | 0.0574 | 0.0062 | 1.0097 | 0.0111 | -0.0031  | 0.0075 |
| Mood swings                                                                                      | European  | 0.2842  | 0.0805 | 3.5315  | 4.00E-04 | 0.0709 | 0.0038 | 1.0188 | 0.0148 | 0.0000   | 0.0077 |
| Illness injury bereavement stress in last 2 years: Serious illness injury or assault to yourself | European  | 0.5416  | 0.1526 | 3.5482  | 4.00E-04 | 0.0116 | 0.0019 | 1.0303 | 0.0107 | -0.0120  | 0.0069 |
| Job involves mainly walking or standing                                                          | European  | -0.3541 | 0.1014 | -3.4923 | 5.00E-04 | 0.0768 | 0.0058 | 1.0435 | 0.0159 | 0.0018   | 0.0089 |
| Types of transport used (excluding work): Public transport                                       | European  | 0.4431  | 0.1265 | 3.5022  | 5.00E-04 | 0.0220 | 0.0023 | 1.0263 | 0.0115 | -0.0072  | 0.0078 |
| Transport type for commuting to job workplace: Public transport                                  | European  | 0.4204  | 0.1235 | 3.4049  | 7.00E-04 | 0.0340 | 0.0042 | 1.0144 | 0.0115 | -0.0049  | 0.0070 |
| Hand grip strength (left)                                                                        | European  | -0.2547 | 0.0761 | -3.3485 | 8.00E-04 | 0.1044 | 0.0051 | 1.0568 | 0.0206 | 0.0096   | 0.0087 |

| Trait                                                                     | ethnicity | rg      | SE     | z       | p        | h2_obs | se     | h2_int | se     | gcov_int | se     |
|---------------------------------------------------------------------------|-----------|---------|--------|---------|----------|--------|--------|--------|--------|----------|--------|
| Ever depressed for a whole week                                           | European  | 0.4516  | 0.1362 | 3.3150  | 9.00E-04 | 0.0638 | 0.0076 | 0.9952 | 0.0123 | -0.0047  | 0.0080 |
| Frequency of tenseness / restlessness in last 2 weeks                     | European  | 0.3208  | 0.0972 | 3.3002  | 1.00E-03 | 0.0433 | 0.0034 | 1.0185 | 0.0148 | 0.0046   | 0.0077 |
| Ever unenthusiastic/disinterested for a whole week                        | European  | 0.4381  | 0.1346 | 3.2545  | 1.10E-03 | 0.0608 | 0.0080 | 1.0002 | 0.0130 | -0.0019  | 0.0078 |
| Suffer from nerves                                                        | European  | 0.3218  | 0.0991 | 3.2472  | 1.20E-03 | 0.0462 | 0.0035 | 0.9970 | 0.0148 | 0.0020   | 0.0075 |
| Illness injury bereavement stress in last 2 years: Financial difficulties | European  | 0.3544  | 0.1118 | 3.1695  | 1.50E-03 | 0.0312 | 0.0025 | 1.0451 | 0.0118 | -0.0101  | 0.0079 |
| Transport type for commuting to job workplace: Car/motor vehicle          | European  | -0.4415 | 0.1413 | -3.1243 | 1.80E-03 | 0.0216 | 0.0037 | 1.0317 | 0.0114 | 0.0002   | 0.0069 |
| Family relationship satisfaction                                          | European  | 0.4146  | 0.1344 | 3.0858  | 2.00E-03 | 0.0514 | 0.0065 | 1.0193 | 0.0116 | -0.0044  | 0.0077 |
| Types of transport used (excluding work): Walk                            | European  | 0.3493  | 0.1129 | 3.0934  | 2.00E-03 | 0.0301 | 0.0026 | 1.0536 | 0.0123 | -0.0087  | 0.0077 |
| Usual walking pace                                                        | European  | -0.2686 | 0.0874 | -3.0740 | 2.10E-03 | 0.0731 | 0.0034 | 1.0589 | 0.0153 | 0.0239   | 0.0084 |
| Time spent driving                                                        | European  | -0.3134 | 0.1074 | -2.9184 | 3.50E-03 | 0.0441 | 0.0034 | 0.9947 | 0.0113 | -0.0022  | 0.0077 |
| Qualifications: None of the above                                         | European  | -0.2415 | 0.0832 | -2.9028 | 3.70E-03 | 0.0968 | 0.0049 | 1.0716 | 0.0201 | -0.0040  | 0.0097 |
| Fed-up feelings                                                           | European  | 0.2096  | 0.0731 | 2.8677  | 4.10E-03 | 0.0701 | 0.0038 | 1.0383 | 0.0165 | 0.0036   | 0.0072 |
| Illnesses of mother: Heart disease                                        | European  | 0.3776  | 0.1315 | 2.8720  | 4.10E-03 | 0.0163 | 0.0021 | 1.0089 | 0.0105 | -0.0060  | 0.0071 |
| Duration of other exercises                                               | European  | -0.4932 | 0.1736 | -2.8402 | 4.50E-03 | 0.0204 | 0.0036 | 1.0059 | 0.0098 | 0.0094   | 0.0075 |
| Illnesses of mother: None of the above (group 1)                          | European  | -0.3622 | 0.1288 | -2.8127 | 4.90E-03 | 0.0168 | 0.0023 | 1.0207 | 0.0125 | 0.0040   | 0.0073 |
| Drive faster than motorway speed limit                                    | European  | -0.2566 | 0.0916 | -2.8012 | 5.10E-03 | 0.0556 | 0.0033 | 1.0389 | 0.0139 | 0.0121   | 0.0082 |
| Qualifications: A levels/AS levels or equivalent                          | European  | 0.2177  | 0.0796 | 2.7354  | 6.20E-03 | 0.0953 | 0.0043 | 1.0652 | 0.0174 | 0.0113   | 0.0088 |
| Frequency of other exercises in last 4 weeks                              | European  | -0.4189 | 0.1549 | -2.7049 | 6.80E-03 | 0.0214 | 0.0041 | 0.9962 | 0.0099 | 0.0094   | 0.0071 |
| Hand grip strength (right)                                                | European  | -0.2110 | 0.0784 | -2.6924 | 7.10E-03 | 0.1024 | 0.0054 | 1.0710 | 0.0210 | 0.0072   | 0.0089 |
| Number of days/week of moderate physical activity 10+ minutes             | European  | -0.2904 | 0.1079 | -2.6910 | 7.10E-03 | 0.0393 | 0.0029 | 1.0311 | 0.0128 | 0.0091   | 0.0083 |
| Frequency of unenthusiasm / disinterest in last 2 weeks                   | European  | 0.2528  | 0.0947 | 2.6697  | 7.60E-03 | 0.0386 | 0.0035 | 1.0198 | 0.0155 | 0.0059   | 0.0072 |
| Duration walking for pleasure                                             | European  | -0.3469 | 0.1304 | -2.6597 | 7.80E-03 | 0.0260 | 0.0030 | 1.0164 | 0.0107 | 0.0267   | 0.0076 |
| Number of days/week of vigorous physical activity 10+ minutes             | European  | -0.2802 | 0.1062 | -2.6376 | 8.30E-03 | 0.0360 | 0.0028 | 1.0275 | 0.0117 | 0.0043   | 0.0082 |
| Light smokers at least 100 smokes in lifetime                             | European  | -0.3162 | 0.1197 | -2.6410 | 8.30E-03 | 0.0710 | 0.0089 | 1.0171 | 0.0113 | 0.0091   | 0.0075 |
| Illnesses of siblings: None of the above (group 2)                        | European  | -0.4996 | 0.1908 | -2.6186 | 8.80E-03 | 0.0098 | 0.0023 | 1.0010 | 0.0102 | 0.0074   | 0.0072 |
| Qualifications: O levels/GCSEs or equivalent                              | European  | 0.2261  | 0.0867 | 2.6086  | 9.10E-03 | 0.0494 | 0.0031 | 1.0092 | 0.0153 | 0.0098   | 0.0076 |
| Hearing difficulty/problems with background noise                         | European  | 0.2295  | 0.0895 | 2.5638  | 1.04E-02 | 0.0530 | 0.0030 | 1.0167 | 0.0131 | -0.0052  | 0.0083 |
| Morning/evening person (chronotype)                                       | European  | 0.1801  | 0.0716 | 2.5147  | 1.19E-02 | 0.1129 | 0.0051 | 1.0663 | 0.0218 | -0.0058  | 0.0081 |
| Number of self-reported non-cancer illnesses                              | European  | 0.2143  | 0.0854 | 2.5093  | 1.21E-02 | 0.0633 | 0.0030 | 1.0210 | 0.0153 | -0.0103  | 0.0086 |
| Other serious medical condition/disability diagnosed by doctor            | European  | 0.2806  | 0.1126 | 2.4926  | 1.27E-02 | 0.0255 | 0.0022 | 1.0140 | 0.0108 | -0.0029  | 0.0076 |
| Age completed full time education                                         | European  | 0.2185  | 0.0896 | 2.4379  | 1.48E-02 | 0.0827 | 0.0052 | 1.0722 | 0.0145 | 0.0005   | 0.0086 |
| Pain type(s) experienced in last month: Stomach or abdominal pain         | European  | 0.2824  | 0.1164 | 2.4267  | 1.52E-02 | 0.0200 | 0.0020 | 1.0166 | 0.0106 | -0.0024  | 0.0073 |
| Types of transport used (excluding work): Car/motor vehicle               | European  | -0.2516 | 0.1042 | -2.4151 | 1.57E-02 | 0.0233 | 0.0021 | 1.0220 | 0.0120 | -0.0007  | 0.0071 |

| Trait                                                                                                          | ethnicity | rg      | SE     | z       | p        | h2_obs | se     | h2_int | se     | gcov_int | se     |
|----------------------------------------------------------------------------------------------------------------|-----------|---------|--------|---------|----------|--------|--------|--------|--------|----------|--------|
| Qualifications: College or University degree                                                                   | European  | 0.1779  | 0.0738 | 2.4099  | 1.60E-02 | 0.1664 | 0.0065 | 1.1352 | 0.0227 | 0.0051   | 0.0108 |
| Non-cancer illness code self-reported: pulmonary embolism +/- dvt                                              | European  | 0.5734  | 0.2388 | 2.4015  | 1.63E-02 | 0.0050 | 0.0018 | 1.0120 | 0.0101 | -0.0195  | 0.0066 |
| Arm fat-free mass (left)                                                                                       | European  | -0.1699 | 0.0708 | -2.3978 | 1.65E-02 | 0.2667 | 0.0145 | 1.1347 | 0.0498 | 0.0126   | 0.0118 |
| Illness injury bereavement stress in last 2 years: None of the above                                           | European  | -0.2871 | 0.1202 | -2.3889 | 1.69E-02 | 0.0211 | 0.0020 | 1.0290 | 0.0101 | 0.0043   | 0.0069 |
| Job involves heavy manual or physical work                                                                     | European  | -0.2138 | 0.0913 | -2.3414 | 1.92E-02 | 0.0807 | 0.0059 | 1.0589 | 0.0158 | -0.0023  | 0.0085 |
| Difficulty not smoking for 1 day                                                                               | European  | 0.4688  | 0.2010 | 2.3327  | 1.97E-02 | 0.1061 | 0.0264 | 0.9941 | 0.0097 | -0.0079  | 0.0073 |
| Time spent using computer                                                                                      | European  | 0.2106  | 0.0904 | 2.3309  | 1.98E-02 | 0.0910 | 0.0050 | 1.0724 | 0.0174 | -0.0057  | 0.0097 |
| Sensitivity / hurt feelings                                                                                    | European  | 0.1868  | 0.0801 | 2.3307  | 1.98E-02 | 0.0638 | 0.0038 | 1.0138 | 0.0151 | 0.0101   | 0.0081 |
| Arm predicted mass (left)                                                                                      | European  | -0.1626 | 0.0698 | -2.3288 | 1.99E-02 | 0.2667 | 0.0145 | 1.1306 | 0.0500 | 0.0108   | 0.0117 |
| Mineral and other dietary supplements: Fish oil (including cod liver oil)                                      | European  | -0.2505 | 0.1084 | -2.3115 | 2.08E-02 | 0.0247 | 0.0023 | 1.0213 | 0.0111 | 0.0011   | 0.0071 |
| Forced expiratory volume in 1-second (FEV1)                                                                    | European  | -0.1615 | 0.0700 | -2.3073 | 2.10E-02 | 0.1524 | 0.0081 | 1.0581 | 0.0249 | 0.0129   | 0.0096 |
| Arm fat-free mass (right)                                                                                      | European  | -0.1579 | 0.0690 | -2.2891 | 2.21E-02 | 0.2689 | 0.0147 | 1.1185 | 0.0511 | 0.0072   | 0.0114 |
| Number of operations self-reported                                                                             | European  | 0.1940  | 0.0852 | 2.2768  | 2.28E-02 | 0.0369 | 0.0026 | 1.0455 | 0.0113 | -0.0078  | 0.0076 |
| Time spent watching television (TV)                                                                            | European  | -0.1808 | 0.0797 | -2.2693 | 2.32E-02 | 0.1007 | 0.0049 | 1.0489 | 0.0184 | 0.0005   | 0.0100 |
| Irritability                                                                                                   | European  | 0.1695  | 0.0752 | 2.2543  | 2.42E-02 | 0.0677 | 0.0043 | 0.9926 | 0.0168 | 0.0006   | 0.0078 |
| Trunk predicted mass                                                                                           | European  | -0.1599 | 0.0710 | -2.2539 | 2.42E-02 | 0.2875 | 0.0169 | 1.1629 | 0.0596 | 0.0120   | 0.0121 |
| Diagnoses - main ICD10: N32 Other disorders of bladder                                                         | European  | 0.6987  | 0.3145 | 2.2217  | 2.63E-02 | 0.0031 | 0.0015 | 0.9950 | 0.0092 | -0.0111  | 0.0067 |
| Worry too long after embarrassment                                                                             | European  | 0.1788  | 0.0809 | 2.2104  | 2.71E-02 | 0.0634 | 0.0037 | 1.0278 | 0.0154 | 0.0206   | 0.0073 |
| Duration of walks                                                                                              | European  | -0.2177 | 0.0989 | -2.2012 | 2.77E-02 | 0.0442 | 0.0036 | 1.0223 | 0.0143 | 0.0009   | 0.0091 |
| Overall health rating                                                                                          | European  | 0.1724  | 0.0784 | 2.1983  | 2.79E-02 | 0.0985 | 0.0040 | 1.0788 | 0.0185 | -0.0060  | 0.0094 |
| Ever had stillbirth spontaneous miscarriage or termination                                                     | European  | 0.3521  | 0.1606 | 2.1925  | 2.83E-02 | 0.0205 | 0.0036 | 0.9968 | 0.0112 | -0.0109  | 0.0072 |
| Trunk fat-free mass                                                                                            | European  | -0.1548 | 0.0708 | -2.1882 | 2.87E-02 | 0.2891 | 0.0170 | 1.1631 | 0.0601 | 0.0107   | 0.0121 |
| Vascular/heart problems diagnosed by doctor: High blood pressure                                               | European  | 0.1646  | 0.0753 | 2.1859  | 2.88E-02 | 0.1139 | 0.0058 | 1.0876 | 0.0274 | -0.0095  | 0.0095 |
| Arm predicted mass (right)                                                                                     | European  | -0.1506 | 0.0690 | -2.1819 | 2.91E-02 | 0.2678 | 0.0147 | 1.1203 | 0.0516 | 0.0076   | 0.0114 |
| Taking other prescription medications                                                                          | European  | 0.1898  | 0.0870 | 2.1806  | 2.92E-02 | 0.0442 | 0.0029 | 1.0144 | 0.0134 | -0.0042  | 0.0079 |
| Non-cancer illness code self-reported: hypertension                                                            | European  | 0.1594  | 0.0737 | 2.1629  | 3.05E-02 | 0.1134 | 0.0057 | 1.0757 | 0.0264 | -0.0088  | 0.0093 |
| Blood clot DVT bronchitis emphysema asthma rhinitis eczema allergy diagnosed by doctor: Blood clot in the lung | European  | 0.4876  | 0.2266 | 2.1519  | 3.14E-02 | 0.0053 | 0.0018 | 1.0132 | 0.0103 | -0.0162  | 0.0065 |
| Why stopped smoking: None of the above                                                                         | European  | -0.3160 | 0.1469 | -2.1511 | 3.15E-02 | 0.0418 | 0.0070 | 0.9981 | 0.0095 | 0.0084   | 0.0065 |
| Vascular/heart problems diagnosed by doctor: None of the above                                                 | European  | -0.1597 | 0.0754 | -2.1187 | 3.41E-02 | 0.1116 | 0.0054 | 1.0839 | 0.0251 | 0.0084   | 0.0094 |
| Types of physical activity in last 4 weeks: Light DIY (eg: pruning watering the lawn)                          | European  | 0.1977  | 0.0937 | 2.1098  | 3.49E-02 | 0.0414 | 0.0028 | 0.9938 | 0.0136 | -0.0028  | 0.0084 |
| Duration of moderate activity                                                                                  | European  | -0.2437 | 0.1157 | -2.1063 | 3.52E-02 | 0.0305 | 0.0030 | 1.0148 | 0.0120 | 0.0010   | 0.0079 |
| Medication for pain relief constipation heartburn: Omeprazole (e.g. Zantrol)                                   | European  | 0.2523  | 0.1201 | 2.1018  | 3.56E-02 | 0.0167 | 0.0018 | 1.0324 | 0.0111 | -0.0055  | 0.0065 |

| Trait                                                                          | ethnicity | rg      | SE     | z       | p        | h2_obs | se     | h2_int | se     | gcov_int | se     |
|--------------------------------------------------------------------------------|-----------|---------|--------|---------|----------|--------|--------|--------|--------|----------|--------|
| Whole body fat-free mass                                                       | European  | -0.1481 | 0.0707 | -2.0953 | 3.61E-02 | 0.2921 | 0.0165 | 1.1522 | 0.0565 | 0.0088   | 0.0121 |
| Length of working week for main job                                            | European  | -0.3220 | 0.1551 | -2.0765 | 3.78E-02 | 0.0186 | 0.0035 | 1.0159 | 0.0110 | 0.0050   | 0.0075 |
| Age when periods started (menarche)                                            | European  | -0.1551 | 0.0748 | -2.0741 | 3.81E-02 | 0.2054 | 0.0137 | 1.0333 | 0.0236 | 0.0124   | 0.0090 |
| Whole body water mass                                                          | European  | -0.1461 | 0.0705 | -2.0725 | 3.82E-02 | 0.2915 | 0.0164 | 1.1553 | 0.0563 | 0.0083   | 0.0122 |
| Diagnoses - main ICD10: K57 Diverticular disease of intestine                  | European  | 0.2659  | 0.1288 | 2.0645  | 3.90E-02 | 0.0125 | 0.0018 | 1.0104 | 0.0113 | -0.0084  | 0.0073 |
| Mouth/teeth dental problems: Painful gums                                      | European  | 0.4347  | 0.2113 | 2.0570  | 3.97E-02 | 0.0056 | 0.0018 | 1.0134 | 0.0100 | -0.0098  | 0.0068 |
| Basal metabolic rate                                                           | European  | -0.1435 | 0.0705 | -2.0356 | 4.18E-02 | 0.2873 | 0.0158 | 1.1384 | 0.0525 | 0.0078   | 0.0122 |
| Qualifications: Other professional qualifications eg: nursing teaching         | European  | 0.2059  | 0.1012 | 2.0353  | 4.18E-02 | 0.0466 | 0.0028 | 1.0302 | 0.0132 | 0.0015   | 0.0091 |
| Illnesses of father: None of the above (group 2)                               | European  | -0.3502 | 0.1739 | -2.0141 | 4.40E-02 | 0.0106 | 0.0021 | 0.9914 | 0.0110 | 0.0052   | 0.0072 |
| Had other major operations                                                     | European  | 0.2639  | 0.1316 | 2.0043  | 4.50E-02 | 0.0294 | 0.0036 | 1.0139 | 0.0102 | -0.0123  | 0.0075 |
| Chest pain or discomfort walking normally                                      | European  | -0.3075 | 0.1548 | -1.9863 | 4.70E-02 | 0.0731 | 0.0113 | 1.0101 | 0.0110 | 0.0090   | 0.0071 |
| Forced expiratory volume in 1-second (FEV1) Best measure                       | European  | -0.1430 | 0.0721 | -1.9824 | 4.74E-02 | 0.1696 | 0.0094 | 1.0416 | 0.0236 | 0.0105   | 0.0094 |
| Forced vital capacity (FVC)                                                    | European  | -0.1416 | 0.0715 | -1.9814 | 4.75E-02 | 0.1758 | 0.0092 | 1.0925 | 0.0278 | 0.0129   | 0.0102 |
| Former alcohol drinker                                                         | European  | 0.3501  | 0.1770 | 1.9778  | 4.80E-02 | 0.1342 | 0.0259 | 0.9877 | 0.0100 | -0.0098  | 0.0070 |
| Forced vital capacity (FVC) Best measure                                       | European  | -0.1465 | 0.0745 | -1.9669 | 4.92E-02 | 0.1964 | 0.0105 | 1.0700 | 0.0273 | 0.0126   | 0.0100 |
| Standing height                                                                | European  | -0.1365 | 0.0695 | -1.9635 | 4.96E-02 | 0.4594 | 0.0290 | 1.2737 | 0.1003 | 0.0199   | 0.0140 |
| Weight                                                                         | European  | -0.1319 | 0.0676 | -1.9519 | 5.10E-02 | 0.2670 | 0.0138 | 1.1065 | 0.0419 | 0.0069   | 0.0118 |
| Length of menstrual cycle                                                      | European  | 0.3116  | 0.1599 | 1.9493  | 5.13E-02 | 0.0988 | 0.0251 | 1.0024 | 0.0114 | -0.0067  | 0.0068 |
| Fluid intelligence score                                                       | European  | 0.1542  | 0.0793 | 1.9448  | 5.18E-02 | 0.2437 | 0.0122 | 1.0344 | 0.0160 | 0.0093   | 0.0093 |
| Non-cancer illness code self-reported: glaucoma                                | European  | 0.2821  | 0.1466 | 1.9244  | 5.43E-02 | 0.0121 | 0.0021 | 1.0103 | 0.0116 | -0.0108  | 0.0078 |
| Non-cancer illness code self-reported: anxiety/panic attacks                   | European  | 0.3565  | 0.1865 | 1.9115  | 5.59E-02 | 0.0066 | 0.0016 | 0.9964 | 0.0098 | 0.0032   | 0.0069 |
| Pulse rate automated reading                                                   | European  | 0.1385  | 0.0726 | 1.9087  | 5.63E-02 | 0.1519 | 0.0128 | 1.0685 | 0.0444 | -0.0066  | 0.0106 |
| Frequency of stair climbing in last 4 weeks                                    | European  | -0.1818 | 0.0970 | -1.8738 | 6.10E-02 | 0.0347 | 0.0028 | 1.0208 | 0.0130 | 0.0155   | 0.0078 |
| Cough on most days                                                             | European  | 0.2830  | 0.1520 | 1.8621  | 6.26E-02 | 0.0461 | 0.0076 | 1.0057 | 0.0104 | -0.0185  | 0.0078 |
| Diagnoses - main ICD10: K22 Other diseases of oesophagus                       | European  | 0.8218  | 0.4423 | 1.8580  | 6.32E-02 | 0.0022 | 0.0018 | 1.0168 | 0.0108 | -0.0096  | 0.0070 |
| Eye problems/disorders: Glaucoma                                               | European  | 0.2726  | 0.1468 | 1.8574  | 6.33E-02 | 0.0391 | 0.0074 | 1.0240 | 0.0130 | -0.0130  | 0.0081 |
| Non-cancer illness code self-reported: kidney stone/ureter stone/bladder stone | European  | 0.3294  | 0.1779 | 1.8517  | 6.41E-02 | 0.0077 | 0.0020 | 1.0099 | 0.0111 | -0.0088  | 0.0068 |
| Illnesses of father: High blood pressure                                       | European  | 0.2565  | 0.1388 | 1.8481  | 6.46E-02 | 0.0188 | 0.0023 | 1.0194 | 0.0117 | -0.0157  | 0.0075 |
| Time from waking to first cigarette                                            | European  | -0.3638 | 0.1969 | -1.8475 | 6.47E-02 | 0.0865 | 0.0304 | 1.0212 | 0.0118 | 0.0018   | 0.0071 |
| Number of live births                                                          | European  | -0.1753 | 0.0956 | -1.8338 | 6.67E-02 | 0.0617 | 0.0047 | 1.0046 | 0.0128 | 0.0048   | 0.0075 |
| Work/job satisfaction                                                          | European  | 0.2791  | 0.1533 | 1.8207  | 6.87E-02 | 0.0483 | 0.0086 | 0.9949 | 0.0107 | -0.0028  | 0.0078 |
| Pain type(s) experienced in last month: Headache                               | European  | 0.1491  | 0.0820 | 1.8176  | 6.91E-02 | 0.0447 | 0.0037 | 1.0095 | 0.0162 | 0.0070   | 0.0075 |



| Trait                                                                                 | ethnicity | rg      | SE     | z       | p        | h2_obs | se     | h2_int | se     | gcov_int | se     |
|---------------------------------------------------------------------------------------|-----------|---------|--------|---------|----------|--------|--------|--------|--------|----------|--------|
| Diagnoses - main ICD10: M70 Soft tissue disorders related to use overuse and pressure | European  | -0.3661 | 0.2015 | -1.8165 | 6.93E-02 | 0.0046 | 0.0015 | 0.9817 | 0.0097 | 0.0048   | 0.0066 |
| Other eye problems                                                                    | European  | 0.3359  | 0.1853 | 1.8130  | 6.98E-02 | 0.0083 | 0.0018 | 1.0329 | 0.0106 | 0.0033   | 0.0079 |
| Used an inhaler for chest within last hour                                            | European  | -0.6051 | 0.3341 | -1.8109 | 7.02E-02 | 0.0026 | 0.0019 | 1.0182 | 0.0098 | 0.0024   | 0.0075 |
| Comparative height size at age 10                                                     | European  | -0.1341 | 0.0748 | -1.7936 | 7.29E-02 | 0.2438 | 0.0157 | 1.1244 | 0.0561 | 0.0113   | 0.0111 |
| Diagnoses - main ICD10: C61 Malignant neoplasm of prostate                            | European  | 0.4370  | 0.2447 | 1.7859  | 7.41E-02 | 0.0046 | 0.0018 | 1.0174 | 0.0112 | -0.0128  | 0.0072 |
| Mouth/teeth dental problems: Bleeding gums                                            | European  | 0.1872  | 0.1051 | 1.7811  | 7.49E-02 | 0.0220 | 0.0024 | 1.0130 | 0.0125 | -0.0076  | 0.0071 |
| Leg fat mass (left)                                                                   | European  | -0.1115 | 0.0629 | -1.7721 | 7.64E-02 | 0.2327 | 0.0109 | 1.0863 | 0.0338 | 0.0075   | 0.0106 |
| Mouth/teeth dental problems: None of the above                                        | European  | -0.1629 | 0.0935 | -1.7422 | 8.15E-02 | 0.0369 | 0.0025 | 1.0211 | 0.0124 | 0.0106   | 0.0076 |
| Alcohol drinker status: Never                                                         | European  | -0.2372 | 0.1368 | -1.7340 | 8.29E-02 | 0.0145 | 0.0021 | 1.0173 | 0.0115 | 0.0098   | 0.0074 |
| Leg fat mass (right)                                                                  | European  | -0.1080 | 0.0629 | -1.7165 | 8.61E-02 | 0.2313 | 0.0108 | 1.0879 | 0.0332 | 0.0074   | 0.0106 |
| Risk taking                                                                           | European  | -0.1518 | 0.0887 | -1.7119 | 8.69E-02 | 0.0537 | 0.0036 | 1.0193 | 0.0153 | 0.0096   | 0.0084 |
| Illnesses of siblings: High blood pressure                                            | European  | 0.1798  | 0.1058 | 1.6995  | 8.92E-02 | 0.0359 | 0.0029 | 1.0175 | 0.0119 | -0.0028  | 0.0075 |
| Leg fat-free mass (left)                                                              | European  | -0.1209 | 0.0715 | -1.6920 | 9.07E-02 | 0.2683 | 0.0146 | 1.1329 | 0.0469 | 0.0037   | 0.0121 |
| Leg predicted mass (left)                                                             | European  | -0.1205 | 0.0713 | -1.6901 | 9.10E-02 | 0.2682 | 0.0146 | 1.1317 | 0.0467 | 0.0035   | 0.0121 |
| Duration of vigorous activity                                                         | European  | -0.1984 | 0.1177 | -1.6854 | 9.19E-02 | 0.0330 | 0.0041 | 1.0031 | 0.0118 | -0.0055  | 0.0073 |
| Non-cancer illness code self-reported: hiatus hernia                                  | European  | 0.2792  | 0.1665 | 1.6771  | 9.35E-02 | 0.0076 | 0.0017 | 1.0425 | 0.0099 | -0.0086  | 0.0065 |
| Number of days/week walked 10+ minutes                                                | European  | -0.1565 | 0.0941 | -1.6635 | 9.62E-02 | 0.0400 | 0.0027 | 1.0226 | 0.0121 | 0.0048   | 0.0083 |
| Why stopped smoking: Health precaution                                                | European  | 0.2204  | 0.1332 | 1.6546  | 9.80E-02 | 0.0541 | 0.0081 | 1.0025 | 0.0108 | -0.0045  | 0.0064 |
| Forced expiratory volume in 1-second (FEV1) predicted percentage                      | European  | -0.1281 | 0.0776 | -1.6518 | 9.86E-02 | 0.2122 | 0.0134 | 1.0174 | 0.0178 | 0.0124   | 0.0083 |
| Leg predicted mass (right)                                                            | European  | -0.1184 | 0.0717 | -1.6515 | 9.86E-02 | 0.2670 | 0.0145 | 1.1335 | 0.0475 | 0.0031   | 0.0121 |
| Mouth/teeth dental problems: Toothache                                                | European  | 0.2782  | 0.1692 | 1.6446  | 1.00E-01 | 0.0094 | 0.0019 | 0.9970 | 0.0106 | -0.0010  | 0.0075 |
| Illnesses of mother: Breast cancer                                                    | European  | 0.2470  | 0.1504 | 1.6421  | 1.01E-01 | 0.0099 | 0.0024 | 1.0066 | 0.0126 | -0.0073  | 0.0065 |
| Number of children fathered                                                           | European  | -0.2011 | 0.1225 | -1.6417 | 1.01E-01 | 0.0320 | 0.0044 | 1.0069 | 0.0114 | -0.0034  | 0.0068 |
| Leg fat-free mass (right)                                                             | European  | -0.1174 | 0.0715 | -1.6413 | 1.01E-01 | 0.2674 | 0.0146 | 1.1333 | 0.0477 | 0.0029   | 0.0121 |
| Exposure to tobacco smoke at home                                                     | European  | -0.2310 | 0.1410 | -1.6377 | 1.02E-01 | 0.0131 | 0.0019 | 0.9882 | 0.0089 | 0.0064   | 0.0071 |
| Diagnoses - main ICD10: R35 Polyuria                                                  | European  | 0.4378  | 0.2684 | 1.6310  | 1.03E-01 | 0.0036 | 0.0017 | 0.9884 | 0.0097 | -0.0006  | 0.0066 |
| Non-cancer illness code self-reported: enlarged prostate                              | European  | 0.3547  | 0.2207 | 1.6067  | 1.08E-01 | 0.0048 | 0.0018 | 1.0143 | 0.0106 | -0.0100  | 0.0068 |
| Sleeplessness / insomnia                                                              | European  | 0.1387  | 0.0864 | 1.6057  | 1.08E-01 | 0.0634 | 0.0033 | 1.0159 | 0.0138 | 0.0053   | 0.0089 |
| Average weekly champagne plus white wine intake                                       | European  | 0.1714  | 0.1071 | 1.6002  | 1.10E-01 | 0.0315 | 0.0033 | 1.0436 | 0.0113 | -0.0038  | 0.0071 |
| Number of incorrect matches in round                                                  | European  | 0.1391  | 0.0869 | 1.5995  | 1.10E-01 | 0.0519 | 0.0033 | 1.0283 | 0.0146 | -0.0005  | 0.0076 |
| Average weekly intake of other alcoholic drinks                                       | European  | 0.7482  | 0.4683 | 1.5978  | 1.10E-01 | 0.0079 | 0.0065 | 1.0050 | 0.0089 | -0.0137  | 0.0067 |
| Noisy workplace                                                                       | European  | -0.1734 | 0.1088 | -1.5938 | 1.11E-01 | 0.0629 | 0.0069 | 1.0258 | 0.0113 | 0.0000   | 0.0078 |
| Mineral and other dietary supplements: Selenium                                       | European  | 0.3088  | 0.1944 | 1.5888  | 1.12E-01 | 0.0064 | 0.0018 | 0.9976 | 0.0100 | -0.0076  | 0.0068 |

| Trait                                                                                                    | ethnicity | rg      | SE     | z       | p        | h2_obs | se     | h2_int | se     | gcov_int | se     |
|----------------------------------------------------------------------------------------------------------|-----------|---------|--------|---------|----------|--------|--------|--------|--------|----------|--------|
| Ever manic/hyper for 2 days                                                                              | European  | 0.2763  | 0.1747 | 1.5821  | 1.14E-01 | 0.0213 | 0.0060 | 0.9892 | 0.0107 | -0.0099  | 0.0059 |
| No-wear time bias adjusted acceleration standard deviation                                               | European  | -0.1819 | 0.1152 | -1.5791 | 1.14E-01 | 0.0853 | 0.0097 | 1.0044 | 0.0118 | -0.0059  | 0.0075 |
| Whole body fat mass                                                                                      | European  | -0.1007 | 0.0640 | -1.5737 | 1.16E-01 | 0.2350 | 0.0113 | 1.0942 | 0.0345 | 0.0054   | 0.0108 |
| Ever smoked                                                                                              | European  | 0.1214  | 0.0780 | 1.5569  | 1.20E-01 | 0.0774 | 0.0043 | 1.0173 | 0.0178 | -0.0202  | 0.0086 |
| Chest pain or discomfort                                                                                 | European  | 0.1572  | 0.1017 | 1.5456  | 1.22E-01 | 0.0327 | 0.0027 | 1.0222 | 0.0128 | 0.0081   | 0.0077 |
| Non-cancer illness code self-reported: joint disorder                                                    | European  | -0.5387 | 0.3488 | -1.5444 | 1.23E-01 | 0.0023 | 0.0015 | 0.9874 | 0.0095 | 0.0117   | 0.0072 |
| Number of treatments/medications taken                                                                   | European  | 0.1298  | 0.0850 | 1.5264  | 1.27E-01 | 0.0610 | 0.0031 | 1.0380 | 0.0147 | -0.0026  | 0.0083 |
| Diagnoses - main ICD10: K40 Inguinal hernia                                                              | European  | -0.1727 | 0.1132 | -1.5259 | 1.27E-01 | 0.0189 | 0.0026 | 0.9879 | 0.0118 | 0.0088   | 0.0068 |
| Number of full brothers                                                                                  | European  | -0.1783 | 0.1175 | -1.5176 | 1.29E-01 | 0.0200 | 0.0021 | 1.0188 | 0.0115 | 0.0176   | 0.0072 |
| Illnesses of mother: None of the above (group 2)                                                         | European  | -0.2389 | 0.1596 | -1.4967 | 1.35E-01 | 0.0086 | 0.0021 | 1.0097 | 0.0109 | 0.0021   | 0.0063 |
| Trunk fat mass                                                                                           | European  | -0.0965 | 0.0650 | -1.4843 | 1.38E-01 | 0.2308 | 0.0111 | 1.1040 | 0.0348 | 0.0044   | 0.0108 |
| Transport type for commuting to job workplace: Walk                                                      | European  | 0.2578  | 0.1741 | 1.4809  | 1.39E-01 | 0.0172 | 0.0034 | 1.0030 | 0.0105 | 0.0063   | 0.0074 |
| Alcohol drinker status: Previous                                                                         | European  | 0.2001  | 0.1352 | 1.4805  | 1.39E-01 | 0.0141 | 0.0019 | 0.9935 | 0.0109 | -0.0054  | 0.0070 |
| Diagnoses - main ICD10: J44 Other chronic obstructive pulmonary disease                                  | European  | -0.3558 | 0.2423 | -1.4684 | 1.42E-01 | 0.0039 | 0.0016 | 1.0060 | 0.0098 | 0.0130   | 0.0072 |
| Mineral and other dietary supplements: None of the above                                                 | European  | 0.1464  | 0.1002 | 1.4604  | 1.44E-01 | 0.0286 | 0.0025 | 1.0200 | 0.0113 | 0.0060   | 0.0072 |
| Had major operations                                                                                     | European  | 0.2159  | 0.1499 | 1.4405  | 1.50E-01 | 0.0260 | 0.0044 | 1.0025 | 0.0103 | -0.0065  | 0.0075 |
| Diagnoses - main ICD10: K60 Fissure and fistula of anal and rectal regions                               | European  | 0.2563  | 0.1799 | 1.4246  | 1.54E-01 | 0.0061 | 0.0017 | 0.9765 | 0.0096 | -0.0049  | 0.0072 |
| Diagnoses - main ICD10: M24 Other specific joint derangements                                            | European  | -0.4058 | 0.2849 | -1.4246 | 1.54E-01 | 0.0033 | 0.0016 | 0.9884 | 0.0090 | 0.0098   | 0.0071 |
| Diagnoses - main ICD10: K50 Crohn's disease [regional enteritis]                                         | European  | 0.3168  | 0.2226 | 1.4236  | 1.55E-01 | 0.0041 | 0.0018 | 1.0106 | 0.0110 | -0.0034  | 0.0070 |
| Tinnitus: Yes now some of the time                                                                       | European  | 0.3520  | 0.2480 | 1.4192  | 1.56E-01 | 0.0113 | 0.0051 | 0.9944 | 0.0097 | -0.0047  | 0.0066 |
| Impedance of arm (left)                                                                                  | European  | 0.0893  | 0.0632 | 1.4142  | 1.57E-01 | 0.2294 | 0.0107 | 1.1469 | 0.0391 | 0.0015   | 0.0109 |
| Forced expiratory volume in 1-second (FEV1) predicted                                                    | European  | -0.1344 | 0.0952 | -1.4120 | 1.58E-01 | 0.1803 | 0.0153 | 1.0305 | 0.0194 | 0.0068   | 0.0088 |
| Diagnoses - main ICD10: H26 Other cataract                                                               | European  | 0.2381  | 0.1693 | 1.4065  | 1.60E-01 | 0.0088 | 0.0019 | 0.9982 | 0.0095 | -0.0056  | 0.0074 |
| Medication for cholesterol blood pressure diabetes or take exogenous hormones: Blood pressure medication | European  | 0.1246  | 0.0893 | 1.3958  | 1.63E-01 | 0.1028 | 0.0075 | 1.0411 | 0.0189 | -0.0068  | 0.0084 |
| Types of physical activity in last 4 weeks: Strenuous sports                                             | European  | -0.1567 | 0.1135 | -1.3804 | 1.68E-01 | 0.0193 | 0.0021 | 1.0282 | 0.0109 | -0.0007  | 0.0071 |
| Diagnoses - main ICD10: K20 Oesophagitis                                                                 | European  | 0.3608  | 0.2628 | 1.3729  | 1.70E-01 | 0.0032 | 0.0015 | 0.9982 | 0.0100 | 0.0016   | 0.0068 |
| Frequency of travelling from home to job workplace                                                       | European  | -0.1952 | 0.1425 | -1.3694 | 1.71E-01 | 0.0183 | 0.0032 | 1.0338 | 0.0099 | -0.0016  | 0.0068 |
| Alcohol intake versus 10 years previously                                                                | European  | -0.1498 | 0.1098 | -1.3639 | 1.73E-01 | 0.0364 | 0.0029 | 1.0176 | 0.0130 | 0.0093   | 0.0084 |
| Loud music exposure frequency                                                                            | European  | 0.2299  | 0.1689 | 1.3612  | 1.74E-01 | 0.0285 | 0.0056 | 1.0147 | 0.0097 | -0.0119  | 0.0073 |
| Mineral and other dietary supplements: Calcium                                                           | European  | 0.1938  | 0.1427 | 1.3583  | 1.74E-01 | 0.0132 | 0.0020 | 0.9917 | 0.0107 | -0.0133  | 0.0075 |
| Diagnoses - main ICD10: D12 Benign neoplasm of colon rectum anus and anal canal                          | European  | -0.2360 | 0.1741 | -1.3553 | 1.75E-01 | 0.0070 | 0.0018 | 1.0173 | 0.0106 | 0.0076   | 0.0068 |
| Diagnoses - main ICD10: M23 Internal derangement of knee                                                 | European  | -0.2439 | 0.1800 | -1.3551 | 1.75E-01 | 0.0088 | 0.0025 | 1.0004 | 0.0125 | -0.0003  | 0.0073 |

| Trait                                                                                                 | ethnicity | rg      | SE     | z       | p        | h2_obs | se     | h2_int | se     | gcov_int | se     |
|-------------------------------------------------------------------------------------------------------|-----------|---------|--------|---------|----------|--------|--------|--------|--------|----------|--------|
| Illnesses of siblings: Diabetes                                                                       | European  | -0.1758 | 0.1303 | -1.3494 | 1.77E-01 | 0.0216 | 0.0028 | 1.0062 | 0.0114 | 0.0173   | 0.0068 |
| Qualifications: CSEs or equivalent                                                                    | European  | -0.1778 | 0.1323 | -1.3437 | 1.79E-01 | 0.0191 | 0.0023 | 1.0663 | 0.0111 | -0.0088  | 0.0079 |
| Vascular/heart problems diagnosed by doctor: Angina                                                   | European  | 0.1395  | 0.1041 | 1.3402  | 1.80E-01 | 0.0223 | 0.0024 | 1.0305 | 0.0115 | 0.0033   | 0.0070 |
| Vitamin and mineral supplements: Vitamin B                                                            | European  | 0.2821  | 0.2105 | 1.3403  | 1.80E-01 | 0.0062 | 0.0018 | 1.0132 | 0.0100 | -0.0017  | 0.0076 |
| Diastolic blood pressure automated reading                                                            | European  | 0.0931  | 0.0705 | 1.3210  | 1.87E-01 | 0.1340 | 0.0069 | 1.0937 | 0.0285 | -0.0121  | 0.0098 |
| Sodium in urine                                                                                       | European  | -0.1079 | 0.0822 | -1.3120 | 1.90E-01 | 0.0670 | 0.0036 | 1.0566 | 0.0163 | -0.0103  | 0.0092 |
| Mineral and other dietary supplements: Glucosamine                                                    | European  | -0.1437 | 0.1099 | -1.3077 | 1.91E-01 | 0.0241 | 0.0024 | 1.0099 | 0.0107 | -0.0141  | 0.0073 |
| Impedance of arm (right)                                                                              | European  | 0.0807  | 0.0618 | 1.3065  | 1.91E-01 | 0.2322 | 0.0108 | 1.1334 | 0.0403 | 0.0022   | 0.0106 |
| Long-standing illness disability or infirmity                                                         | European  | 0.1087  | 0.0832 | 1.3056  | 1.92E-01 | 0.0500 | 0.0028 | 1.0312 | 0.0136 | 0.0008   | 0.0075 |
| Medication for cholesterol blood pressure diabetes or take exogenous hormones: None of the above      | European  | -0.1266 | 0.0970 | -1.3056 | 1.92E-01 | 0.0623 | 0.0053 | 1.0316 | 0.0138 | 0.0033   | 0.0073 |
| Alcohol intake frequency.                                                                             | European  | -0.1074 | 0.0829 | -1.2968 | 1.95E-01 | 0.0826 | 0.0049 | 1.0503 | 0.0177 | 0.0133   | 0.0094 |
| Financial situation satisfaction                                                                      | European  | 0.1636  | 0.1273 | 1.2846  | 1.99E-01 | 0.0556 | 0.0069 | 1.0107 | 0.0114 | 0.0033   | 0.0073 |
| Hair/balding pattern: Pattern 4                                                                       | European  | 0.0941  | 0.0745 | 1.2634  | 2.06E-01 | 0.1549 | 0.0258 | 1.1461 | 0.0524 | -0.0124  | 0.0085 |
| Leg fat percentage (left)                                                                             | European  | -0.0774 | 0.0614 | -1.2608 | 2.07E-01 | 0.2083 | 0.0087 | 1.0985 | 0.0302 | 0.0078   | 0.0102 |
| Illnesses of siblings: None of the above (group 1)                                                    | European  | -0.1442 | 0.1150 | -1.2533 | 2.10E-01 | 0.0347 | 0.0031 | 1.0282 | 0.0125 | -0.0011  | 0.0080 |
| Townsend deprivation index at recruitment                                                             | European  | 0.1326  | 0.1066 | 1.2437  | 2.14E-01 | 0.0341 | 0.0024 | 1.0327 | 0.0111 | -0.0087  | 0.0082 |
| Smoking/smokers in household                                                                          | European  | -0.2220 | 0.1793 | -1.2380 | 2.16E-01 | 0.0110 | 0.0023 | 1.0046 | 0.0116 | 0.0037   | 0.0076 |
| Leg fat percentage (right)                                                                            | European  | -0.0747 | 0.0605 | -1.2350 | 2.17E-01 | 0.2086 | 0.0087 | 1.0949 | 0.0295 | 0.0081   | 0.0099 |
| Average weekly spirits intake                                                                         | European  | -0.1323 | 0.1076 | -1.2293 | 2.19E-01 | 0.0313 | 0.0032 | 1.0166 | 0.0114 | 0.0057   | 0.0072 |
| Back pain for 3+ months                                                                               | European  | -0.1922 | 0.1579 | -1.2174 | 2.24E-01 | 0.0384 | 0.0074 | 0.9904 | 0.0113 | -0.0019  | 0.0066 |
| Mineral and other dietary supplements: Zinc                                                           | European  | 0.1770  | 0.1458 | 1.2139  | 2.25E-01 | 0.0110 | 0.0019 | 0.9917 | 0.0103 | 0.0028   | 0.0069 |
| Cancer code self-reported: squamous cell carcinoma                                                    | European  | 0.5577  | 0.4636 | 1.2029  | 2.29E-01 | 0.0018 | 0.0017 | 1.0061 | 0.0110 | -0.0064  | 0.0068 |
| Non-cancer illness code self-reported: angina                                                         | European  | 0.1245  | 0.1044 | 1.1923  | 2.33E-01 | 0.0230 | 0.0024 | 1.0262 | 0.0114 | 0.0025   | 0.0070 |
| Sitting height                                                                                        | European  | -0.0829 | 0.0702 | -1.1814 | 2.37E-01 | 0.3316 | 0.0234 | 1.1263 | 0.0711 | 0.0084   | 0.0123 |
| Ever used hormone-replacement therapy (HRT)                                                           | European  | -0.1408 | 0.1193 | -1.1803 | 2.38E-01 | 0.0427 | 0.0038 | 0.9933 | 0.0109 | 0.0135   | 0.0080 |
| Underlying (primary) cause of death: ICD10: J84.1 Other interstitial pulmonary diseases with fibrosis | European  | 0.3597  | 0.3063 | 1.1743  | 2.40E-01 | 0.1194 | 0.0793 | 0.9899 | 0.0102 | -0.0072  | 0.0065 |
| Arm fat mass (left)                                                                                   | European  | -0.0749 | 0.0639 | -1.1725 | 2.41E-01 | 0.2320 | 0.0114 | 1.0904 | 0.0333 | 0.0008   | 0.0108 |
| Diagnoses - main ICD10: M67 Other disorders of synovium and tendon                                    | European  | 0.3350  | 0.2871 | 1.1665  | 2.43E-01 | 0.0027 | 0.0015 | 0.9959 | 0.0086 | -0.0024  | 0.0070 |
| Diagnoses - main ICD10: R10 Abdominal and pelvic pain                                                 | European  | 0.1625  | 0.1395 | 1.1651  | 2.44E-01 | 0.0121 | 0.0019 | 0.9963 | 0.0101 | -0.0045  | 0.0073 |
| Arm fat mass (right)                                                                                  | European  | -0.0740 | 0.0636 | -1.1630 | 2.45E-01 | 0.2310 | 0.0115 | 1.0967 | 0.0341 | 0.0012   | 0.0107 |
| Most recent bowel cancer screening                                                                    | European  | 0.3604  | 0.3152 | 1.1432  | 2.53E-01 | 0.0101 | 0.0069 | 1.0138 | 0.0087 | 0.0006   | 0.0069 |

| Trait                                                                                          | ethnicity | rg      | SE     | z       | p        | h2_obs | se     | h2_int | se     | gcov_int | se     |
|------------------------------------------------------------------------------------------------|-----------|---------|--------|---------|----------|--------|--------|--------|--------|----------|--------|
| Illnesses of father: Prostate cancer                                                           | European  | 0.1914  | 0.1676 | 1.1419  | 2.54E-01 | 0.0092 | 0.0022 | 1.0093 | 0.0120 | -0.0055  | 0.0069 |
| Number of pregnancy terminations                                                               | European  | -0.1986 | 0.1752 | -1.1337 | 2.57E-01 | 0.0578 | 0.0118 | 1.0100 | 0.0106 | 0.0083   | 0.0072 |
| Number of trend entries                                                                        | European  | -0.2338 | 0.2080 | -1.1242 | 2.61E-01 | 0.0428 | 0.0113 | 0.9980 | 0.0096 | 0.0075   | 0.0072 |
| Number of cigarettes currently smoked daily (current cigarette smokers)                        | European  | 0.2043  | 0.1823 | 1.1208  | 2.62E-01 | 0.0973 | 0.0287 | 1.0065 | 0.0103 | 0.0024   | 0.0068 |
| Hair/balding pattern: Pattern 2                                                                | European  | -0.1285 | 0.1147 | -1.1207 | 2.62E-01 | 0.0469 | 0.0084 | 1.0520 | 0.0231 | 0.0128   | 0.0070 |
| Fathers age at death                                                                           | European  | 0.1172  | 0.1050 | 1.1167  | 2.64E-01 | 0.0330 | 0.0036 | 1.0292 | 0.0128 | -0.0108  | 0.0069 |
| Maximum heart rate during fitness test                                                         | European  | 0.1690  | 0.1531 | 1.1041  | 2.70E-01 | 0.0707 | 0.0140 | 1.0157 | 0.0121 | -0.0046  | 0.0071 |
| Number of depression episodes                                                                  | European  | 0.2184  | 0.2004 | 1.0896  | 2.76E-01 | 0.0395 | 0.0138 | 1.0008 | 0.0092 | 0.0094   | 0.0071 |
| Diagnoses - main ICD10: Z47 Other orthopaedic follow-up care                                   | European  | 0.6252  | 0.5815 | 1.0752  | 2.82E-01 | 0.0016 | 0.0017 | 1.0102 | 0.0111 | -0.0050  | 0.0069 |
| Diagnoses - main ICD10: K44 Diaphragmatic hernia                                               | European  | 0.2365  | 0.2214 | 1.0684  | 2.85E-01 | 0.0042 | 0.0016 | 1.0154 | 0.0098 | -0.0032  | 0.0070 |
| Job involves shift work                                                                        | European  | -0.1425 | 0.1369 | -1.0415 | 2.98E-01 | 0.0260 | 0.0033 | 1.0209 | 0.0097 | -0.0004  | 0.0078 |
| Pain type(s) experienced in last month: Facial pain                                            | European  | 0.1678  | 0.1647 | 1.0187  | 3.08E-01 | 0.0066 | 0.0018 | 1.0025 | 0.0104 | 0.0027   | 0.0071 |
| Bring up phlegm/sputum/mucus on most days                                                      | European  | 0.1995  | 0.1970 | 1.0128  | 3.11E-01 | 0.0266 | 0.0081 | 1.0117 | 0.0111 | -0.0104  | 0.0070 |
| Health satisfaction                                                                            | European  | 0.1108  | 0.1105 | 1.0031  | 3.16E-01 | 0.0783 | 0.0065 | 1.0190 | 0.0126 | 0.0085   | 0.0079 |
| Average weekly fortified wine intake                                                           | European  | 0.1622  | 0.1629 | 0.9957  | 3.19E-01 | 0.0120 | 0.0027 | 1.0180 | 0.0105 | 0.0042   | 0.0070 |
| Diagnoses - main ICD10: I21 Acute myocardial infarction                                        | European  | 0.1423  | 0.1431 | 0.9945  | 3.20E-01 | 0.0102 | 0.0019 | 1.0060 | 0.0107 | -0.0081  | 0.0065 |
| Diagnoses - main ICD10: K80 Cholelithiasis                                                     | European  | 0.1753  | 0.1768 | 0.9918  | 3.21E-01 | 0.0075 | 0.0022 | 1.0409 | 0.0169 | -0.0031  | 0.0076 |
| Hip circumference                                                                              | European  | -0.0636 | 0.0647 | -0.9831 | 3.26E-01 | 0.2165 | 0.0118 | 1.1132 | 0.0352 | 0.0004   | 0.0116 |
| Waist circumference                                                                            | European  | -0.0646 | 0.0661 | -0.9769 | 3.29E-01 | 0.1991 | 0.0103 | 1.0901 | 0.0301 | -0.0036  | 0.0106 |
| Diagnoses - main ICD10: R69 Unknown and unspecified causes of morbidity                        | European  | 0.1955  | 0.2002 | 0.9765  | 3.29E-01 | 0.0055 | 0.0018 | 0.9984 | 0.0107 | -0.0003  | 0.0068 |
| Diagnoses - main ICD10: M54 Dorsalgia                                                          | European  | -0.1341 | 0.1380 | -0.9716 | 3.31E-01 | 0.0117 | 0.0019 | 0.9938 | 0.0101 | 0.0015   | 0.0071 |
| Hearing difficulty/problems: Yes                                                               | European  | 0.0893  | 0.0919 | 0.9712  | 3.31E-01 | 0.0430 | 0.0033 | 1.0091 | 0.0143 | 0.0006   | 0.0078 |
| Diagnoses - main ICD10: R31 Unspecified haematuria                                             | European  | -0.3223 | 0.3325 | -0.9693 | 3.32E-01 | 0.0023 | 0.0017 | 1.0193 | 0.0098 | 0.0030   | 0.0070 |
| Home area population density - urban or rural: Scotland - Large Urban Area                     | European  | 0.2679  | 0.2766 | 0.9686  | 3.33E-01 | 0.0089 | 0.0039 | 2.1563 | 0.0228 | 0.0005   | 0.0107 |
| Pulse wave peak to peak time                                                                   | European  | -0.1272 | 0.1317 | -0.9660 | 3.34E-01 | 0.0398 | 0.0061 | 1.0089 | 0.0115 | 0.0059   | 0.0068 |
| Illness injury bereavement stress in last 2 years: Marital separation/divorce                  | European  | 0.2166  | 0.2255 | 0.9602  | 3.37E-01 | 0.0037 | 0.0017 | 1.0139 | 0.0101 | -0.0043  | 0.0065 |
| Medication for pain relief constipation heartburn: Paracetamol                                 | European  | 0.0894  | 0.0931 | 0.9603  | 3.37E-01 | 0.0417 | 0.0028 | 1.0324 | 0.0126 | -0.0015  | 0.0077 |
| Types of physical activity in last 4 weeks: Walking for pleasure (not as a means of transport) | European  | 0.0947  | 0.0992 | 0.9554  | 3.39E-01 | 0.0351 | 0.0025 | 1.0567 | 0.0116 | -0.0012  | 0.0077 |
| Impedance of whole body                                                                        | European  | 0.0584  | 0.0616 | 0.9481  | 3.43E-01 | 0.2581 | 0.0119 | 1.1297 | 0.0398 | 0.0046   | 0.0115 |
| Illnesses of father: None of the above (group 1)                                               | European  | -0.1519 | 0.1617 | -0.9397 | 3.47E-01 | 0.0138 | 0.0023 | 1.0343 | 0.0115 | -0.0011  | 0.0073 |
| Age at last live birth                                                                         | European  | 0.0914  | 0.0981 | 0.9315  | 3.52E-01 | 0.0867 | 0.0075 | 1.0267 | 0.0135 | -0.0153  | 0.0070 |
| Non-cancer illness code self-reported: vaginal prolapse/uterine prolapse                       | European  | 0.1948  | 0.2093 | 0.9307  | 3.52E-01 | 0.0054 | 0.0018 | 1.0005 | 0.0101 | -0.0053  | 0.0072 |

| Trait                                                                                               | ethnicity | rg      | SE     | z       | p        | h2_obs | se     | h2_int | se     | gcov_int | se     |
|-----------------------------------------------------------------------------------------------------|-----------|---------|--------|---------|----------|--------|--------|--------|--------|----------|--------|
| Illnesses of father: Chronic bronchitis/emphysema                                                   | European  | -0.1195 | 0.1287 | -0.9280 | 3.53E-01 | 0.0161 | 0.0023 | 1.0172 | 0.0107 | 0.0137   | 0.0067 |
| Trunk fat percentage                                                                                | European  | -0.0591 | 0.0637 | -0.9273 | 3.54E-01 | 0.2044 | 0.0098 | 1.1152 | 0.0323 | 0.0018   | 0.0102 |
| Adopted as a child                                                                                  | European  | 0.1979  | 0.2137 | 0.9260  | 3.55E-01 | 0.0055 | 0.0015 | 1.0064 | 0.0098 | -0.0066  | 0.0074 |
| Body fat percentage                                                                                 | European  | -0.0570 | 0.0615 | -0.9257 | 3.55E-01 | 0.2158 | 0.0099 | 1.1069 | 0.0324 | 0.0026   | 0.0102 |
| Alcohol usually taken with meals                                                                    | European  | 0.0884  | 0.0956 | 0.9241  | 3.56E-01 | 0.1086 | 0.0062 | 1.0617 | 0.0143 | 0.0011   | 0.0087 |
| Mouth/teeth dental problems: Mouth ulcers                                                           | European  | 0.0974  | 0.1058 | 0.9209  | 3.57E-01 | 0.0278 | 0.0040 | 1.0460 | 0.0162 | -0.0084  | 0.0081 |
| Non-cancer illness code self-reported: hypothyroidism/myxoedema                                     | European  | 0.0792  | 0.0862 | 0.9179  | 3.59E-01 | 0.0514 | 0.0075 | 1.0449 | 0.0253 | 0.0044   | 0.0080 |
| Doctor diagnosed asthma                                                                             | European  | 0.1112  | 0.1213 | 0.9166  | 3.59E-01 | 0.0791 | 0.0128 | 0.9841 | 0.0131 | -0.0107  | 0.0074 |
| Diagnoses - main ICD10: K51 Ulcerative colitis                                                      | European  | -0.2203 | 0.2464 | -0.8941 | 3.71E-01 | 0.0043 | 0.0019 | 1.0147 | 0.0109 | 0.0030   | 0.0072 |
| Body mass index (BMI)                                                                               | European  | -0.0548 | 0.0614 | -0.8926 | 3.72E-01 | 0.2479 | 0.0118 | 1.1014 | 0.0359 | -0.0023  | 0.0112 |
| Maximum workload during fitness test                                                                | European  | -0.1697 | 0.1904 | -0.8914 | 3.73E-01 | 0.0508 | 0.0119 | 1.0029 | 0.0105 | 0.0052   | 0.0076 |
| Reproducibility of spirometry measurement using ERS/ATS criteria                                    | European  | -0.1270 | 0.1433 | -0.8865 | 3.75E-01 | 0.0144 | 0.0026 | 1.0081 | 0.0105 | 0.0027   | 0.0067 |
| Non-cancer illness code self-reported: ulcerative colitis                                           | European  | -0.1958 | 0.2210 | -0.8862 | 3.76E-01 | 0.0058 | 0.0020 | 1.0090 | 0.0120 | 0.0064   | 0.0079 |
| Diagnoses - main ICD10: M16 Coxarthrosis [arthrosis of hip]                                         | European  | -0.1413 | 0.1603 | -0.8814 | 3.78E-01 | 0.0101 | 0.0021 | 1.0085 | 0.0123 | 0.0014   | 0.0075 |
| Diagnoses - main ICD10: N19 Unspecified renal failure                                               | European  | 0.2764  | 0.3164 | 0.8737  | 3.82E-01 | 0.0022 | 0.0015 | 1.0047 | 0.0089 | -0.0079  | 0.0068 |
| Medication for pain relief constipation heartburn: None of the above                                | European  | -0.0690 | 0.0796 | -0.8666 | 3.86E-01 | 0.0512 | 0.0034 | 1.0488 | 0.0147 | -0.0018  | 0.0080 |
| Qualifications: NVQ or HND or HNC or equivalent                                                     | European  | -0.1179 | 0.1364 | -0.8643 | 3.87E-01 | 0.0151 | 0.0021 | 1.0100 | 0.0114 | 0.0000   | 0.0073 |
| Non-cancer illness code self-reported: cholelithiasis/gall stones                                   | European  | 0.1436  | 0.1662 | 0.8637  | 3.88E-01 | 0.0082 | 0.0021 | 1.0299 | 0.0165 | -0.0040  | 0.0072 |
| Systolic blood pressure automated reading                                                           | European  | 0.0611  | 0.0709 | 0.8621  | 3.89E-01 | 0.1263 | 0.0066 | 1.0882 | 0.0255 | -0.0075  | 0.0089 |
| Medication for pain relief constipation heartburn: Ibuprofen (e.g. Nurofen)                         | European  | 0.0973  | 0.1136 | 0.8565  | 3.92E-01 | 0.0209 | 0.0021 | 1.0116 | 0.0103 | -0.0100  | 0.0075 |
| Shortness of breath walking on level ground                                                         | European  | 0.1157  | 0.1358 | 0.8522  | 3.94E-01 | 0.0541 | 0.0065 | 0.9991 | 0.0112 | -0.0020  | 0.0082 |
| Diagnoses - main ICD10: R04 Haemorrhage from respiratory passages                                   | European  | 0.5905  | 0.6953 | 0.8493  | 3.96E-01 | 0.0011 | 0.0017 | 1.0101 | 0.0100 | -0.0062  | 0.0068 |
| Started insulin within one year diagnosis of diabetes                                               | European  | 0.1608  | 0.1895 | 0.8482  | 3.96E-01 | 0.1502 | 0.0528 | 1.0139 | 0.0140 | 0.0103   | 0.0073 |
| Diagnoses - main ICD10: I84 Haemorrhoids                                                            | European  | -0.1199 | 0.1413 | -0.8481 | 3.96E-01 | 0.0095 | 0.0020 | 0.9998 | 0.0109 | 0.0099   | 0.0067 |
| Ever highly irritable/argumentative for 2 days                                                      | European  | 0.0924  | 0.1094 | 0.8443  | 3.99E-01 | 0.0530 | 0.0071 | 0.9980 | 0.0126 | 0.0091   | 0.0068 |
| Weight change compared with 1 year ago                                                              | European  | 0.1522  | 0.1810 | 0.8412  | 4.00E-01 | 0.0073 | 0.0017 | 1.0311 | 0.0103 | -0.0052  | 0.0077 |
| Non-cancer illness code self-reported: diverticular disease/diverticulitis                          | European  | 0.1179  | 0.1408 | 0.8374  | 4.02E-01 | 0.0131 | 0.0021 | 0.9944 | 0.0110 | -0.0043  | 0.0077 |
| Age started oral contraceptive pill                                                                 | European  | -0.0981 | 0.1209 | -0.8109 | 4.17E-01 | 0.0467 | 0.0052 | 1.0207 | 0.0122 | -0.0007  | 0.0078 |
| Home area population density - urban or rural: England/Wales - Village - less sparse                | European  | -0.3289 | 0.4106 | -0.8010 | 4.23E-01 | 0.0018 | 0.0017 | 1.0274 | 0.0101 | 0.0108   | 0.0078 |
| Diagnoses - main ICD10: S52 Fracture of forearm                                                     | European  | 0.1295  | 0.1617 | 0.8011  | 4.23E-01 | 0.0068 | 0.0019 | 0.9955 | 0.0100 | -0.0049  | 0.0065 |
| Number of unsuccessful stop-smoking attempts                                                        | European  | 0.1215  | 0.1523 | 0.7980  | 4.25E-01 | 0.0472 | 0.0093 | 1.0083 | 0.0109 | 0.0074   | 0.0070 |
| Types of physical activity in last 4 weeks: Other exercises (eg: swimming cycling keep fit bowling) | European  | -0.0729 | 0.0926 | -0.7864 | 4.32E-01 | 0.0455 | 0.0029 | 1.0190 | 0.0143 | -0.0008  | 0.0084 |

| Trait                                                                                                                        | ethnicity | rg      | SE     | z       | p        | h2_obs | se     | h2_int | se     | gcov_int | se     |
|------------------------------------------------------------------------------------------------------------------------------|-----------|---------|--------|---------|----------|--------|--------|--------|--------|----------|--------|
| Diagnoses - main ICD10: R11 Nausea and vomiting                                                                              | European  | -0.3502 | 0.4476 | -0.7823 | 4.34E-01 | 0.0013 | 0.0015 | 0.9957 | 0.0095 | 0.0098   | 0.0071 |
| Why stopped smoking: Doctors advice                                                                                          | European  | 0.2191  | 0.2807 | 0.7807  | 4.35E-01 | 0.0123 | 0.0059 | 1.0083 | 0.0086 | -0.0013  | 0.0073 |
| Non-cancer illness code self-reported: rheumatoid arthritis                                                                  | European  | -0.1719 | 0.2211 | -0.7775 | 4.37E-01 | 0.0051 | 0.0016 | 1.0088 | 0.0101 | 0.0029   | 0.0074 |
| Falls in the last year                                                                                                       | European  | 0.0836  | 0.1087 | 0.7692  | 4.42E-01 | 0.0311 | 0.0024 | 1.0208 | 0.0120 | -0.0029  | 0.0076 |
| Pain type(s) experienced in last month: Neck or shoulder pain                                                                | European  | 0.0767  | 0.1006 | 0.7626  | 4.46E-01 | 0.0325 | 0.0024 | 1.0281 | 0.0126 | -0.0012  | 0.0076 |
| Heel bone mineral density (BMD) T-score automated (right)                                                                    | European  | -0.0516 | 0.0684 | -0.7546 | 4.51E-01 | 0.2934 | 0.0381 | 1.0517 | 0.0365 | 0.0033   | 0.0088 |
| Diagnoses - main ICD10: T84 Complications of internal orthopaedic prosthetic devices implants and grafts                     | European  | -0.2023 | 0.2713 | -0.7456 | 4.56E-01 | 0.0030 | 0.0019 | 1.0035 | 0.0107 | 0.0101   | 0.0068 |
| Medication for pain relief constipation heartburn: Laxatives (e.g. Dulcolax Senokot)                                         | European  | 0.1056  | 0.1425 | 0.7413  | 4.59E-01 | 0.0106 | 0.0019 | 1.0177 | 0.0106 | -0.0118  | 0.0075 |
| Average weekly red wine intake                                                                                               | European  | 0.0788  | 0.1066 | 0.7390  | 4.60E-01 | 0.0545 | 0.0042 | 1.0236 | 0.0135 | 0.0027   | 0.0086 |
| Type of tobacco previously smoked: Cigars or pipes                                                                           | European  | -0.2532 | 0.3434 | -0.7375 | 4.61E-01 | 0.0075 | 0.0058 | 1.0103 | 0.0085 | 0.0083   | 0.0071 |
| Non-cancer illness code self-reported: pernicious anaemia                                                                    | European  | -0.2315 | 0.3167 | -0.7310 | 4.65E-01 | 0.0023 | 0.0016 | 0.9996 | 0.0096 | 0.0090   | 0.0069 |
| Non-accidental death in close genetic family                                                                                 | European  | -0.1434 | 0.1993 | -0.7196 | 4.72E-01 | 0.0192 | 0.0056 | 0.9962 | 0.0099 | 0.0086   | 0.0070 |
| Non-cancer illness code self-reported: varicose veins                                                                        | European  | 0.1615  | 0.2250 | 0.7179  | 4.73E-01 | 0.0048 | 0.0016 | 1.0072 | 0.0094 | -0.0072  | 0.0071 |
| Diagnoses - main ICD10: I30 Acute pericarditis                                                                               | European  | 0.2022  | 0.2827 | 0.7151  | 4.75E-01 | 0.0032 | 0.0017 | 0.9876 | 0.0097 | -0.0051  | 0.0070 |
| Non-cancer illness code self-reported: arthritis (nos)                                                                       | European  | -0.2532 | 0.3548 | -0.7137 | 4.75E-01 | 0.0017 | 0.0016 | 1.0172 | 0.0090 | -0.0045  | 0.0070 |
| Non-cancer illness code self-reported: uterine fibroids                                                                      | European  | -0.1354 | 0.1928 | -0.7025 | 4.82E-01 | 0.0060 | 0.0020 | 1.0201 | 0.0107 | 0.0029   | 0.0071 |
| Doctor diagnosed hayfever or allergic rhinitis                                                                               | European  | -0.0765 | 0.1095 | -0.6985 | 4.85E-01 | 0.0884 | 0.0111 | 0.9936 | 0.0132 | 0.0006   | 0.0073 |
| Diagnoses - main ICD10: N92 Excessive frequent and irregular menstruation                                                    | European  | 0.1216  | 0.1743 | 0.6977  | 4.85E-01 | 0.0075 | 0.0019 | 1.0023 | 0.0107 | 0.0037   | 0.0074 |
| Blood clot DVT bronchitis emphysema asthma rhinitis eczema allergy diagnosed by doctor: Hayfever allergic rhinitis or eczema | European  | -0.0523 | 0.0753 | -0.6948 | 4.87E-01 | 0.0748 | 0.0073 | 1.0410 | 0.0257 | 0.0141   | 0.0087 |
| Heel bone mineral density (BMD) T-score automated                                                                            | European  | -0.0419 | 0.0607 | -0.6902 | 4.90E-01 | 0.2865 | 0.0360 | 1.1238 | 0.0603 | 0.0002   | 0.0097 |
| Maternal smoking around birth                                                                                                | European  | -0.0657 | 0.0959 | -0.6859 | 4.93E-01 | 0.0509 | 0.0035 | 1.0317 | 0.0141 | 0.0014   | 0.0084 |
| Illnesses of siblings: Heart disease                                                                                         | European  | 0.0977  | 0.1427 | 0.6847  | 4.94E-01 | 0.0153 | 0.0028 | 1.0268 | 0.0110 | 0.0061   | 0.0068 |
| Blood clot DVT bronchitis emphysema asthma rhinitis eczema allergy diagnosed by doctor: Asthma                               | European  | -0.0505 | 0.0740 | -0.6824 | 4.95E-01 | 0.0580 | 0.0080 | 1.0337 | 0.0273 | 0.0067   | 0.0078 |
| Diagnoses - main ICD10: J33 Nasal polyp                                                                                      | European  | -0.1637 | 0.2410 | -0.6792 | 4.97E-01 | 0.0036 | 0.0018 | 1.0083 | 0.0108 | 0.0096   | 0.0068 |
| Duration of strenuous sports                                                                                                 | European  | -0.1789 | 0.2643 | -0.6769 | 4.99E-01 | 0.0302 | 0.0165 | 0.9945 | 0.0100 | -0.0009  | 0.0067 |
| Non-cancer illness code self-reported: pneumothorax                                                                          | European  | -0.1717 | 0.2567 | -0.6687 | 5.04E-01 | 0.0032 | 0.0016 | 0.9861 | 0.0092 | 0.0044   | 0.0070 |
| Diagnoses - main ICD10: M10 Gout                                                                                             | European  | -0.2373 | 0.3577 | -0.6636 | 5.07E-01 | 0.0016 | 0.0016 | 1.0053 | 0.0100 | 0.0004   | 0.0072 |
| Current employment status: Doing unpaid or voluntary work                                                                    | European  | 0.1213  | 0.1838 | 0.6597  | 5.09E-01 | 0.0089 | 0.0018 | 1.0107 | 0.0103 | 0.0081   | 0.0081 |
| Frequency of light DIY in last 4 weeks                                                                                       | European  | 0.0967  | 0.1468 | 0.6588  | 5.10E-01 | 0.0246 | 0.0036 | 0.9954 | 0.0107 | 0.0013   | 0.0076 |
| Diagnoses - main ICD10: K35 Acute appendicitis                                                                               | European  | 0.2129  | 0.3250 | 0.6549  | 5.13E-01 | 0.0022 | 0.0016 | 1.0037 | 0.0103 | 0.0048   | 0.0071 |

| Trait                                                                                                                                                  | ethnicity | rg      | SE     | z       | p        | h2_obs | se     | h2_int | se     | gcov_int | se     |
|--------------------------------------------------------------------------------------------------------------------------------------------------------|-----------|---------|--------|---------|----------|--------|--------|--------|--------|----------|--------|
| Current tobacco smoking                                                                                                                                | European  | 0.0573  | 0.0877 | 0.6537  | 5.13E-01 | 0.0548 | 0.0034 | 1.0197 | 0.0154 | -0.0066  | 0.0082 |
| Diagnoses - main ICD10: S66 Injury of muscle and tendon at wrist and hand level                                                                        | European  | -0.3864 | 0.5975 | -0.6467 | 5.18E-01 | 0.0009 | 0.0016 | 1.0122 | 0.0098 | 0.0088   | 0.0072 |
| Birth weight                                                                                                                                           | European  | -0.0563 | 0.0873 | -0.6456 | 5.19E-01 | 0.1081 | 0.0074 | 1.0565 | 0.0212 | 0.0092   | 0.0084 |
| Tinnitus: Yes now most or all of the time                                                                                                              | European  | -0.0922 | 0.1428 | -0.6454 | 5.19E-01 | 0.0334 | 0.0056 | 0.9969 | 0.0105 | -0.0020  | 0.0067 |
| Illnesses of mother: High blood pressure                                                                                                               | European  | 0.0651  | 0.1022 | 0.6371  | 5.24E-01 | 0.0296 | 0.0026 | 1.0186 | 0.0122 | 0.0058   | 0.0074 |
| Knee pain for 3+ months                                                                                                                                | European  | -0.1301 | 0.2051 | -0.6342 | 5.26E-01 | 0.0253 | 0.0079 | 0.9994 | 0.0092 | 0.0098   | 0.0074 |
| Eye problems/disorders: Cataract                                                                                                                       | European  | 0.1329  | 0.2102 | 0.6323  | 5.27E-01 | 0.0204 | 0.0055 | 1.0197 | 0.0109 | 0.0028   | 0.0080 |
| Diagnoses - main ICD10: L03 Cellulitis                                                                                                                 | European  | 0.1303  | 0.2090 | 0.6238  | 5.33E-01 | 0.0046 | 0.0019 | 0.9967 | 0.0100 | -0.0083  | 0.0063 |
| Bilateral oophorectomy (both ovaries removed)                                                                                                          | European  | -0.0895 | 0.1445 | -0.6198 | 5.35E-01 | 0.0228 | 0.0038 | 1.0125 | 0.0106 | 0.0101   | 0.0070 |
| Cancer diagnosed by doctor                                                                                                                             | European  | -0.1265 | 0.2057 | -0.6151 | 5.39E-01 | 0.0055 | 0.0019 | 1.0214 | 0.0102 | 0.0024   | 0.0069 |
| Smoking status: Current                                                                                                                                | European  | 0.0546  | 0.0895 | 0.6100  | 5.42E-01 | 0.0518 | 0.0033 | 1.0190 | 0.0147 | -0.0061  | 0.0081 |
| Reason for glasses/contact lenses: For just reading/near work as you are getting older (called presbyopia)                                             | European  | -0.2003 | 0.3309 | -0.6051 | 5.45E-01 | 0.0026 | 0.0021 | 1.1399 | 0.0126 | -0.0023  | 0.0079 |
| Diagnoses - main ICD10: K43 Ventral hernia                                                                                                             | European  | -0.1250 | 0.2076 | -0.6023 | 5.47E-01 | 0.0058 | 0.0017 | 0.9917 | 0.0098 | 0.0055   | 0.0071 |
| Types of physical activity in last 4 weeks: Heavy DIY (eg: weeding lawn mowing carpentry digging)                                                      | European  | -0.0644 | 0.1070 | -0.6018 | 5.47E-01 | 0.0309 | 0.0023 | 1.0325 | 0.0114 | 0.0083   | 0.0075 |
| Reason for glasses/contact lenses: For long-sightedness i.e. for distance and near but particularly for near tasks like reading (called hypermetropia) | European  | 0.0963  | 0.1620 | 0.5943  | 5.52E-01 | 0.0092 | 0.0019 | 1.0717 | 0.0112 | -0.0066  | 0.0069 |
| Non-cancer illness code self-reported: type 2 diabetes                                                                                                 | European  | 0.1198  | 0.2017 | 0.5941  | 5.53E-01 | 0.0058 | 0.0017 | 1.0135 | 0.0103 | -0.0033  | 0.0072 |
| Non-cancer illness code self-reported: retinal detachment                                                                                              | European  | 0.1759  | 0.2967 | 0.5929  | 5.53E-01 | 0.0023 | 0.0016 | 1.0109 | 0.0094 | -0.0054  | 0.0069 |
| Diagnoses - main ICD10: I48 Atrial fibrillation and flutter                                                                                            | European  | -0.0787 | 0.1329 | -0.5920 | 5.54E-01 | 0.0122 | 0.0022 | 1.0204 | 0.0180 | -0.0016  | 0.0069 |
| Non-cancer illness code self-reported: muscle or soft tissue injuries                                                                                  | European  | 0.1787  | 0.3024 | 0.5909  | 5.55E-01 | 0.0026 | 0.0016 | 0.9996 | 0.0098 | -0.0090  | 0.0073 |
| Non-cancer illness code self-reported: hypertrophic cardiomyopathy (hcm / hocm)                                                                        | European  | 0.5239  | 0.8906 | 0.5883  | 5.56E-01 | 0.0007 | 0.0015 | 1.0070 | 0.0092 | -0.0100  | 0.0077 |
| Number of older siblings                                                                                                                               | European  | -0.2889 | 0.4951 | -0.5835 | 5.60E-01 | 0.0038 | 0.0056 | 1.0125 | 0.0095 | 0.0149   | 0.0071 |
| Pain type(s) experienced in last month: Back pain                                                                                                      | European  | -0.0586 | 0.1014 | -0.5776 | 5.64E-01 | 0.0382 | 0.0027 | 1.0259 | 0.0134 | -0.0017  | 0.0082 |
| Diagnoses - main ICD10: N40 Hyperplasia of prostate                                                                                                    | European  | 0.1149  | 0.1994 | 0.5765  | 5.64E-01 | 0.0054 | 0.0018 | 1.0118 | 0.0109 | -0.0108  | 0.0072 |
| Non-cancer illness code self-reported: mania/bipolar disorder/manic depression                                                                         | European  | 0.1104  | 0.1921 | 0.5746  | 5.66E-01 | 0.0062 | 0.0016 | 0.9985 | 0.0089 | 0.0032   | 0.0074 |
| Diagnoses - main ICD10: K21 Gastro-oesophageal reflux disease                                                                                          | European  | 0.1026  | 0.1793 | 0.5725  | 5.67E-01 | 0.0063 | 0.0016 | 1.0032 | 0.0091 | -0.0013  | 0.0069 |
| Hair/balding pattern: Pattern 3                                                                                                                        | European  | 0.0643  | 0.1126 | 0.5708  | 5.68E-01 | 0.0565 | 0.0203 | 1.0212 | 0.0394 | -0.0081  | 0.0080 |
| Current employment status: Unable to work because of sickness or disability                                                                            | European  | 0.0709  | 0.1243 | 0.5701  | 5.69E-01 | 0.0237 | 0.0023 | 1.0258 | 0.0110 | 0.0016   | 0.0083 |
| Diagnoses - main ICD10: R07 Pain in throat and chest                                                                                                   | European  | 0.0719  | 0.1270 | 0.5660  | 5.71E-01 | 0.0163 | 0.0020 | 1.0085 | 0.0112 | 0.0094   | 0.0076 |

| Trait                                                                                                               | ethnicity | rg      | SE     | z       | p        | h2_obs | se     | h2_int | se     | gcov_int | se     |
|---------------------------------------------------------------------------------------------------------------------|-----------|---------|--------|---------|----------|--------|--------|--------|--------|----------|--------|
| Relative age voice broke                                                                                            | European  | -0.0617 | 0.1091 | -0.5655 | 5.72E-01 | 0.0722 | 0.0071 | 1.0210 | 0.0139 | 0.0018   | 0.0084 |
| Types of physical activity in last 4 weeks: None of the above                                                       | European  | -0.0629 | 0.1119 | -0.5620 | 5.74E-01 | 0.0247 | 0.0020 | 1.0127 | 0.0108 | -0.0004  | 0.0069 |
| Creatinine (enzymatic) in urine                                                                                     | European  | -0.0431 | 0.0767 | -0.5619 | 5.74E-01 | 0.0626 | 0.0035 | 1.0436 | 0.0151 | -0.0077  | 0.0088 |
| Sleep duration                                                                                                      | European  | -0.0416 | 0.0747 | -0.5571 | 5.78E-01 | 0.0707 | 0.0041 | 1.0287 | 0.0173 | -0.0091  | 0.0076 |
| Illness injury bereavement stress in last 2 years: Serious illness injury or assault of a close relative            | European  | 0.0899  | 0.1620 | 0.5548  | 5.79E-01 | 0.0099 | 0.0021 | 1.0208 | 0.0108 | 0.0054   | 0.0071 |
| Blood clot DVT bronchitis emphysema asthma rhinitis eczema allergy diagnosed by doctor: Blood clot in the leg (DVT) | European  | 0.0867  | 0.1585 | 0.5469  | 5.84E-01 | 0.0097 | 0.0021 | 1.0189 | 0.0158 | -0.0053  | 0.0067 |
| Eye problems/disorders: Diabetes related eye disease                                                                | European  | 0.0995  | 0.1824 | 0.5455  | 5.85E-01 | 0.0191 | 0.0053 | 1.0053 | 0.0098 | 0.0069   | 0.0069 |
| Illnesses of father: Diabetes                                                                                       | European  | -0.0707 | 0.1315 | -0.5374 | 5.91E-01 | 0.0178 | 0.0029 | 1.0315 | 0.0129 | 0.0015   | 0.0072 |
| Frequency of heavy DIY in last 4 weeks                                                                              | European  | -0.0976 | 0.1820 | -0.5364 | 5.92E-01 | 0.0181 | 0.0041 | 1.0142 | 0.0091 | 0.0009   | 0.0071 |
| Non-cancer illness code self-reported: malabsorption/coeliac disease                                                | European  | 0.2136  | 0.4003 | 0.5335  | 5.94E-01 | 0.0221 | 0.0171 | 0.9853 | 0.0318 | -0.0137  | 0.0076 |
| Had menopause                                                                                                       | European  | -0.0987 | 0.1865 | -0.5290 | 5.97E-01 | 0.0212 | 0.0050 | 1.0073 | 0.0113 | 0.0047   | 0.0077 |
| Pulse rate                                                                                                          | European  | 0.0506  | 0.0958 | 0.5278  | 5.98E-01 | 0.1354 | 0.0142 | 1.0311 | 0.0204 | 0.0035   | 0.0086 |
| Leg pain on walking                                                                                                 | European  | -0.0613 | 0.1170 | -0.5243 | 6.00E-01 | 0.0609 | 0.0065 | 0.9927 | 0.0124 | -0.0004  | 0.0072 |
| Medication for cholesterol blood pressure diabetes or take exogenous hormones: Hormone replacement therapy          | European  | 0.0886  | 0.1698 | 0.5219  | 6.02E-01 | 0.0147 | 0.0033 | 1.0034 | 0.0102 | -0.0072  | 0.0067 |
| Diagnoses - main ICD10: K29 Gastritis and duodenitis                                                                | European  | 0.0928  | 0.1782 | 0.5207  | 6.03E-01 | 0.0077 | 0.0017 | 1.0049 | 0.0098 | 0.0042   | 0.0075 |
| Vitamin and mineral supplements: Vitamin C                                                                          | European  | -0.0672 | 0.1306 | -0.5148 | 6.07E-01 | 0.0139 | 0.0019 | 0.9946 | 0.0101 | 0.0012   | 0.0071 |
| Diagnoses - main ICD10: G47 Sleep disorders                                                                         | European  | -0.0931 | 0.1810 | -0.5144 | 6.07E-01 | 0.0063 | 0.0017 | 0.9917 | 0.0095 | 0.0056   | 0.0069 |
| Diagnoses - main ICD10: K76 Other diseases of liver                                                                 | European  | 0.1654  | 0.3220 | 0.5137  | 6.08E-01 | 0.0025 | 0.0016 | 1.0039 | 0.0102 | 0.0023   | 0.0070 |
| Fractured/broken bones in last 5 years                                                                              | European  | 0.0589  | 0.1157 | 0.5093  | 6.11E-01 | 0.0180 | 0.0024 | 1.0180 | 0.0115 | -0.0130  | 0.0065 |
| Wears glasses or contact lenses                                                                                     | European  | 0.0649  | 0.1285 | 0.5053  | 6.13E-01 | 0.0161 | 0.0019 | 1.0001 | 0.0108 | 0.0047   | 0.0070 |
| Non-cancer illness code self-reported: deep venous thrombosis (dvt)                                                 | European  | 0.0786  | 0.1557 | 0.5050  | 6.14E-01 | 0.0101 | 0.0022 | 1.0176 | 0.0159 | -0.0053  | 0.0070 |
| Target heart rate achieved                                                                                          | European  | 0.0941  | 0.1896 | 0.4961  | 6.20E-01 | 0.0414 | 0.0119 | 0.9963 | 0.0103 | -0.0059  | 0.0072 |
| Non-cancer illness code self-reported: asthma                                                                       | European  | -0.0368 | 0.0743 | -0.4959 | 6.20E-01 | 0.0585 | 0.0081 | 1.0372 | 0.0276 | 0.0047   | 0.0079 |
| Non-cancer illness code self-reported: iron deficiency anaemia                                                      | European  | 0.1015  | 0.2055 | 0.4937  | 6.22E-01 | 0.0040 | 0.0015 | 0.9951 | 0.0086 | -0.0002  | 0.0063 |
| Diagnoses - main ICD10: H25 Senile cataract                                                                         | European  | 0.1354  | 0.2768 | 0.4891  | 6.25E-01 | 0.0026 | 0.0017 | 1.0203 | 0.0108 | -0.0004  | 0.0072 |
| Cancer code self-reported: lung cancer                                                                              | European  | 0.2005  | 0.4154 | 0.4828  | 6.29E-01 | 0.0013 | 0.0014 | 0.9854 | 0.0090 | -0.0010  | 0.0070 |
| Diagnoses - main ICD10: O75 Other complications of labour and delivery not elsewhere classified                     | European  | 0.1288  | 0.2692 | 0.4783  | 6.33E-01 | 0.0030 | 0.0015 | 0.9871 | 0.0090 | 0.0018   | 0.0071 |
| Blood clot DVT bronchitis emphysema asthma rhinitis eczema allergy diagnosed by doctor: None of the above           | European  | 0.0326  | 0.0692 | 0.4706  | 6.38E-01 | 0.0789 | 0.0089 | 1.0346 | 0.0304 | -0.0108  | 0.0084 |
| Pain type(s) experienced in last month: Hip pain                                                                    | European  | -0.0520 | 0.1108 | -0.4696 | 6.39E-01 | 0.0234 | 0.0022 | 1.0219 | 0.0111 | -0.0059  | 0.0078 |



| Trait                                                                                  | ethnicity | rg      | SE     | z       | p        | h2_obs | se     | h2_int | se     | gcov_int | se     |
|----------------------------------------------------------------------------------------|-----------|---------|--------|---------|----------|--------|--------|--------|--------|----------|--------|
| Vascular/heart problems diagnosed by doctor: Heart attack                              | European  | 0.0534  | 0.1145 | 0.4659  | 6.41E-01 | 0.0194 | 0.0022 | 1.0106 | 0.0115 | 0.0018   | 0.0076 |
| Mouth/teeth dental problems: Loose teeth                                               | European  | -0.0580 | 0.1247 | -0.4656 | 6.42E-01 | 0.0159 | 0.0021 | 0.9978 | 0.0108 | -0.0065  | 0.0070 |
| Vitamin and mineral supplements: Vitamin D                                             | European  | -0.0767 | 0.1671 | -0.4592 | 6.46E-01 | 0.0072 | 0.0019 | 0.9894 | 0.0105 | -0.0051  | 0.0073 |
| Age at first live birth                                                                | European  | 0.0397  | 0.0864 | 0.4591  | 6.46E-01 | 0.1645 | 0.0088 | 1.0539 | 0.0140 | -0.0079  | 0.0078 |
| Diagnoses - main ICD10: K30 Dyspepsia                                                  | European  | -0.1352 | 0.2952 | -0.4579 | 6.47E-01 | 0.0026 | 0.0017 | 1.0091 | 0.0104 | 0.0021   | 0.0068 |
| Vitamin and mineral supplements: Vitamin A                                             | European  | 0.1196  | 0.2616 | 0.4574  | 6.47E-01 | 0.0038 | 0.0017 | 1.0019 | 0.0097 | -0.0061  | 0.0076 |
| Non-cancer illness code self-reported: migraine                                        | European  | 0.0623  | 0.1381 | 0.4511  | 6.52E-01 | 0.0151 | 0.0022 | 1.0280 | 0.0121 | 0.0035   | 0.0070 |
| Past tobacco smoking                                                                   | European  | -0.0344 | 0.0765 | -0.4491 | 6.53E-01 | 0.0950 | 0.0050 | 1.0057 | 0.0180 | 0.0102   | 0.0088 |
| Non-cancer illness code self-reported: hypopituitarism                                 | European  | 0.2882  | 0.6558 | 0.4395  | 6.60E-01 | 0.0008 | 0.0015 | 0.9910 | 0.0089 | 0.0009   | 0.0067 |
| Duration of heavy DIY                                                                  | European  | 0.0567  | 0.1303 | 0.4353  | 6.63E-01 | 0.0361 | 0.0049 | 1.0005 | 0.0107 | -0.0003  | 0.0072 |
| Pain type(s) experienced in last month: Knee pain                                      | European  | -0.0420 | 0.0965 | -0.4349 | 6.64E-01 | 0.0401 | 0.0028 | 1.0136 | 0.0133 | -0.0055  | 0.0082 |
| Diagnoses - main ICD10: K52 Other non-infective gastro-enteritis and colitis           | European  | 0.1185  | 0.2737 | 0.4329  | 6.65E-01 | 0.0040 | 0.0016 | 1.0131 | 0.0092 | -0.0061  | 0.0076 |
| Mouth/teeth dental problems: Dentures                                                  | European  | -0.0386 | 0.0902 | -0.4279 | 6.69E-01 | 0.0484 | 0.0035 | 1.0384 | 0.0163 | 0.0025   | 0.0084 |
| Illness injury bereavement stress in last 2 years: Death of a close relative           | European  | -0.0838 | 0.1970 | -0.4252 | 6.71E-01 | 0.0051 | 0.0018 | 1.0167 | 0.0095 | 0.0052   | 0.0064 |
| Average weekly beer plus cider intake                                                  | European  | -0.0419 | 0.0988 | -0.4241 | 6.72E-01 | 0.0515 | 0.0037 | 1.0589 | 0.0144 | -0.0074  | 0.0080 |
| Pain type(s) experienced in last month: Pain all over the body                         | European  | 0.0686  | 0.1621 | 0.4232  | 6.72E-01 | 0.0087 | 0.0020 | 1.0135 | 0.0108 | -0.0005  | 0.0070 |
| Fractured bone site(s): Wrist                                                          | European  | 0.0857  | 0.2027 | 0.4229  | 6.72E-01 | 0.0055 | 0.0019 | 1.0186 | 0.0107 | -0.0105  | 0.0074 |
| Fractured bone site(s): Ankle                                                          | European  | -0.0885 | 0.2102 | -0.4210 | 6.74E-01 | 0.0053 | 0.0017 | 1.0014 | 0.0093 | -0.0036  | 0.0073 |
| Comparative body size at age 10                                                        | European  | 0.0305  | 0.0726 | 0.4194  | 6.75E-01 | 0.1455 | 0.0111 | 1.0367 | 0.0310 | -0.0100  | 0.0098 |
| Relative age of first facial hair                                                      | European  | -0.0343 | 0.0824 | -0.4162 | 6.77E-01 | 0.1169 | 0.0087 | 1.0753 | 0.0187 | -0.0062  | 0.0084 |
| Medication for cholesterol blood pressure or diabetes: Cholesterol lowering medication | European  | -0.0448 | 0.1083 | -0.4135 | 6.79E-01 | 0.0644 | 0.0088 | 1.0575 | 0.0258 | 0.0143   | 0.0083 |
| Illnesses of father: Heart disease                                                     | European  | 0.0416  | 0.1046 | 0.3974  | 6.91E-01 | 0.0297 | 0.0032 | 1.0120 | 0.0125 | 0.0072   | 0.0083 |
| Duration of light DIY                                                                  | European  | 0.0466  | 0.1183 | 0.3944  | 6.93E-01 | 0.0372 | 0.0040 | 0.9980 | 0.0108 | 0.0009   | 0.0076 |
| Medication for pain relief constipation heartburn: Aspirin                             | European  | 0.0448  | 0.1148 | 0.3898  | 6.97E-01 | 0.0220 | 0.0023 | 1.0118 | 0.0113 | 0.0085   | 0.0073 |
| Types of transport used (excluding work): Cycle                                        | European  | 0.0415  | 0.1066 | 0.3892  | 6.97E-01 | 0.0245 | 0.0022 | 1.0305 | 0.0113 | -0.0026  | 0.0078 |
| Diagnoses - main ICD10: C44 Other malignant neoplasms of skin                          | European  | 0.0536  | 0.1406 | 0.3814  | 7.03E-01 | 0.0112 | 0.0029 | 1.0002 | 0.0142 | -0.0076  | 0.0074 |
| Non-cancer illness code self-reported: hayfever/allergic rhinitis                      | European  | -0.0411 | 0.1083 | -0.3794 | 7.04E-01 | 0.0247 | 0.0029 | 1.0117 | 0.0135 | -0.0019  | 0.0069 |
| Frequency of walking for pleasure in last 4 weeks                                      | European  | -0.0383 | 0.1028 | -0.3728 | 7.09E-01 | 0.0352 | 0.0032 | 1.0048 | 0.0131 | -0.0047  | 0.0074 |
| Diagnoses - main ICD10: I80 Phlebitis and thrombophlebitis                             | European  | -0.0693 | 0.1898 | -0.3650 | 7.15E-01 | 0.0062 | 0.0020 | 1.0093 | 0.0125 | -0.0016  | 0.0070 |
| Ever stopped smoking for 6+ months                                                     | European  | -0.0778 | 0.2141 | -0.3637 | 7.16E-01 | 0.0183 | 0.0067 | 1.0008 | 0.0099 | 0.0101   | 0.0067 |
| Diagnoses - main ICD10: M72 Fibroblastic disorders                                     | European  | -0.0543 | 0.1496 | -0.3629 | 7.17E-01 | 0.0129 | 0.0025 | 1.0016 | 0.0140 | 0.0080   | 0.0077 |
| Vitamin and mineral supplements: Vitamin E                                             | European  | 0.0637  | 0.1762 | 0.3616  | 7.18E-01 | 0.0082 | 0.0016 | 0.9849 | 0.0089 | -0.0043  | 0.0078 |

| Trait                                                                                                                | ethnicity | rg      | SE     | z       | p        | h2_obs | se     | h2_int | se     | gcov_int | se     |
|----------------------------------------------------------------------------------------------------------------------|-----------|---------|--------|---------|----------|--------|--------|--------|--------|----------|--------|
| Transport type for commuting to job workplace: Cycle                                                                 | European  | 0.0430  | 0.1208 | 0.3557  | 7.22E-01 | 0.0310 | 0.0036 | 1.0145 | 0.0111 | -0.0016  | 0.0072 |
| Diagnoses - main ICD10: N20 Calculus of kidney and ureter                                                            | European  | 0.0674  | 0.1917 | 0.3517  | 7.25E-01 | 0.0071 | 0.0017 | 1.0122 | 0.0104 | -0.0047  | 0.0081 |
| Headaches for 3+ months                                                                                              | European  | 0.0582  | 0.1680 | 0.3462  | 7.29E-01 | 0.0561 | 0.0092 | 1.0045 | 0.0097 | -0.0053  | 0.0078 |
| Reason for reducing amount of alcohol drunk: Health precaution                                                       | European  | -0.0402 | 0.1169 | -0.3442 | 7.31E-01 | 0.0423 | 0.0055 | 1.0102 | 0.0105 | 0.0117   | 0.0070 |
| Arm fat percentage (right)                                                                                           | European  | -0.0209 | 0.0620 | -0.3363 | 7.37E-01 | 0.2145 | 0.0103 | 1.1090 | 0.0325 | -0.0014  | 0.0104 |
| Non-cancer illness code self-reported: heart attack/myocardial infarction                                            | European  | 0.0376  | 0.1134 | 0.3316  | 7.40E-01 | 0.0200 | 0.0022 | 1.0084 | 0.0114 | 0.0037   | 0.0077 |
| Prospective memory result                                                                                            | European  | -0.0377 | 0.1144 | -0.3298 | 7.42E-01 | 0.0593 | 0.0068 | 1.0113 | 0.0115 | -0.0007  | 0.0078 |
| Diagnoses - main ICD10: J34 Other disorders of nose and nasal sinuses                                                | European  | 0.0932  | 0.2886 | 0.3230  | 7.47E-01 | 0.0023 | 0.0016 | 1.0106 | 0.0100 | 0.0026   | 0.0066 |
| Diagnoses - main ICD10: J22 Unspecified acute lower respiratory infection                                            | European  | -0.0984 | 0.3069 | -0.3205 | 7.49E-01 | 0.0023 | 0.0017 | 0.9993 | 0.0106 | 0.0058   | 0.0070 |
| Number of full sisters                                                                                               | European  | -0.0405 | 0.1268 | -0.3192 | 7.50E-01 | 0.0192 | 0.0021 | 1.0312 | 0.0105 | 0.0073   | 0.0077 |
| Diagnoses - main ICD10: R14 Flatulence and related conditions                                                        | European  | 0.0887  | 0.2852 | 0.3111  | 7.56E-01 | 0.0031 | 0.0015 | 0.9912 | 0.0095 | -0.0006  | 0.0073 |
| Medication for cholesterol blood pressure or diabetes: Blood pressure medication                                     | European  | 0.0286  | 0.0923 | 0.3100  | 7.57E-01 | 0.1006 | 0.0066 | 1.0552 | 0.0159 | -0.0014  | 0.0087 |
| Diagnoses - main ICD10: I83 Varicose veins of lower extremities                                                      | European  | -0.0364 | 0.1180 | -0.3083 | 7.58E-01 | 0.0177 | 0.0025 | 1.0440 | 0.0133 | 0.0088   | 0.0075 |
| Non-cancer illness code self-reported: nasal polyps                                                                  | European  | 0.0687  | 0.2304 | 0.2980  | 7.66E-01 | 0.0046 | 0.0019 | 1.0107 | 0.0098 | -0.0070  | 0.0072 |
| Handedness (chirality/laterality): Use both right and left hands equally                                             | European  | -0.0627 | 0.2117 | -0.2964 | 7.67E-01 | 0.0054 | 0.0016 | 0.9967 | 0.0099 | 0.0006   | 0.0074 |
| Blood clot DVT bronchitis emphysema asthma rhinitis eczema allergy diagnosed by doctor: Emphysema/chronic bronchitis | European  | -0.0433 | 0.1473 | -0.2937 | 7.69E-01 | 0.0121 | 0.0020 | 0.9865 | 0.0111 | 0.0051   | 0.0074 |
| Snoring                                                                                                              | European  | -0.0246 | 0.0841 | -0.2920 | 7.70E-01 | 0.0594 | 0.0037 | 1.0311 | 0.0150 | 0.0032   | 0.0083 |
| Duration of fitness test                                                                                             | European  | -0.0670 | 0.2348 | -0.2856 | 7.75E-01 | 0.0279 | 0.0112 | 0.9980 | 0.0100 | 0.0029   | 0.0069 |
| Diagnoses - main ICD10: C50 Malignant neoplasm of breast                                                             | European  | -0.0488 | 0.1715 | -0.2846 | 7.76E-01 | 0.0077 | 0.0021 | 1.0169 | 0.0126 | 0.0019   | 0.0072 |
| Ever had bowel cancer screening                                                                                      | European  | -0.0358 | 0.1263 | -0.2837 | 7.77E-01 | 0.0132 | 0.0020 | 1.0182 | 0.0104 | -0.0016  | 0.0066 |
| Number of self-reported cancers                                                                                      | European  | -0.0617 | 0.2242 | -0.2752 | 7.83E-01 | 0.0045 | 0.0018 | 1.0283 | 0.0102 | 0.0014   | 0.0067 |
| Non-cancer illness code self-reported: gastro-oesophageal reflux (gord) / gastric reflux                             | European  | 0.0394  | 0.1435 | 0.2743  | 7.84E-01 | 0.0125 | 0.0020 | 1.0109 | 0.0105 | 0.0080   | 0.0072 |
| Nap during day                                                                                                       | European  | -0.0217 | 0.0803 | -0.2698 | 7.87E-01 | 0.0783 | 0.0043 | 1.0434 | 0.0168 | 0.0088   | 0.0093 |
| Current employment status: Retired                                                                                   | European  | -0.0491 | 0.1847 | -0.2657 | 7.91E-01 | 0.0072 | 0.0018 | 1.0223 | 0.0106 | 0.0073   | 0.0074 |
| Cancer code self-reported: malignant melanoma                                                                        | European  | 0.0588  | 0.2252 | 0.2612  | 7.94E-01 | 0.0042 | 0.0017 | 0.9998 | 0.0098 | -0.0006  | 0.0064 |
| Pulse wave Arterial Stiffness index                                                                                  | European  | 0.0362  | 0.1402 | 0.2581  | 7.96E-01 | 0.0405 | 0.0063 | 1.0040 | 0.0115 | -0.0032  | 0.0072 |
| Non-cancer illness code self-reported: osteoporosis                                                                  | European  | -0.0331 | 0.1315 | -0.2519 | 8.01E-01 | 0.0132 | 0.0024 | 1.0135 | 0.0129 | 0.0016   | 0.0070 |
| Distance between home and job workplace                                                                              | European  | 0.0510  | 0.2039 | 0.2499  | 8.03E-01 | 0.0126 | 0.0037 | 1.0024 | 0.0099 | 0.0008   | 0.0068 |
| Cancer code self-reported: basal cell carcinoma                                                                      | European  | -0.0364 | 0.1466 | -0.2484 | 8.04E-01 | 0.0108 | 0.0022 | 0.9968 | 0.0115 | 0.0037   | 0.0076 |
| Birth weight of first child                                                                                          | European  | -0.0223 | 0.0909 | -0.2452 | 8.06E-01 | 0.1090 | 0.0081 | 1.0280 | 0.0158 | 0.0051   | 0.0082 |
| Illnesses of father: Lung cancer                                                                                     | European  | -0.0325 | 0.1327 | -0.2446 | 8.07E-01 | 0.0162 | 0.0023 | 0.9905 | 0.0114 | 0.0055   | 0.0074 |

| Trait                                                                                                                                        | ethnicity | rg      | SE     | z       | p        | h2_obs | se     | h2_int | se     | gcov_int | se     |
|----------------------------------------------------------------------------------------------------------------------------------------------|-----------|---------|--------|---------|----------|--------|--------|--------|--------|----------|--------|
| Heel bone mineral density (BMD) T-score automated (left)                                                                                     | European  | -0.0153 | 0.0641 | -0.2389 | 8.11E-01 | 0.2920 | 0.0376 | 1.0500 | 0.0366 | 0.0021   | 0.0086 |
| Impedance of leg (right)                                                                                                                     | European  | 0.0149  | 0.0633 | 0.2361  | 8.13E-01 | 0.2419 | 0.0114 | 1.1188 | 0.0367 | 0.0093   | 0.0113 |
| Fracture resulting from simple fall                                                                                                          | European  | -0.0442 | 0.1940 | -0.2276 | 8.20E-01 | 0.0572 | 0.0178 | 0.9867 | 0.0098 | 0.0002   | 0.0070 |
| Father still alive                                                                                                                           | European  | 0.0433  | 0.1923 | 0.2251  | 8.22E-01 | 0.0064 | 0.0019 | 1.0178 | 0.0107 | 0.0031   | 0.0071 |
| Diagnoses - main ICD10: Z09 Follow-up examination after treatment for conditions other than malignant neoplasms                              | European  | -0.0529 | 0.2399 | -0.2204 | 8.26E-01 | 0.0032 | 0.0016 | 0.9964 | 0.0095 | 0.0028   | 0.0061 |
| Non-cancer illness code self-reported: psoriasis                                                                                             | European  | -0.0429 | 0.1979 | -0.2170 | 8.28E-01 | 0.0065 | 0.0020 | 1.0301 | 0.0149 | 0.0053   | 0.0078 |
| Diagnoses - main ICD10: I20 Angina pectoris                                                                                                  | European  | -0.0354 | 0.1630 | -0.2169 | 8.28E-01 | 0.0083 | 0.0019 | 1.0114 | 0.0108 | 0.0086   | 0.0067 |
| Daytime dozing / sleeping (narcolepsy)                                                                                                       | European  | 0.0176  | 0.0821 | 0.2141  | 8.31E-01 | 0.0458 | 0.0032 | 1.0327 | 0.0140 | 0.0140   | 0.0077 |
| Smoking status: Previous                                                                                                                     | European  | -0.0188 | 0.0884 | -0.2124 | 8.32E-01 | 0.0540 | 0.0037 | 1.0093 | 0.0161 | -0.0039  | 0.0085 |
| Diagnoses - main ICD10: B37 Candidiasis                                                                                                      | European  | -0.5395 | 2.5395 | -0.2124 | 8.32E-01 | 0.0006 | 0.0016 | 0.9987 | 0.0091 | -0.0001  | 0.0069 |
| Ever had hysterectomy (womb removed)                                                                                                         | European  | -0.0338 | 0.1605 | -0.2106 | 8.33E-01 | 0.0204 | 0.0040 | 1.0104 | 0.0114 | 0.0043   | 0.0075 |
| Tobacco smoking: Ex-smoker                                                                                                                   | European  | -0.0268 | 0.1316 | -0.2040 | 8.38E-01 | 0.0795 | 0.0100 | 1.0071 | 0.0110 | 0.0036   | 0.0072 |
| Arm fat percentage (left)                                                                                                                    | European  | -0.0125 | 0.0622 | -0.2007 | 8.41E-01 | 0.2176 | 0.0104 | 1.1059 | 0.0325 | -0.0028  | 0.0105 |
| Illnesses of mother: Diabetes                                                                                                                | European  | 0.0241  | 0.1206 | 0.1999  | 8.42E-01 | 0.0192 | 0.0023 | 1.0290 | 0.0128 | 0.0063   | 0.0072 |
| Potassium in urine                                                                                                                           | European  | 0.0185  | 0.0924 | 0.1997  | 8.42E-01 | 0.0408 | 0.0028 | 1.0313 | 0.0137 | -0.0131  | 0.0086 |
| Pain type(s) experienced in last month: None of the above                                                                                    | European  | 0.0165  | 0.0841 | 0.1965  | 8.44E-01 | 0.0523 | 0.0032 | 1.0552 | 0.0141 | -0.0067  | 0.0077 |
| Fractured bone site(s): Other bones                                                                                                          | European  | -0.0341 | 0.1757 | -0.1941 | 8.46E-01 | 0.0081 | 0.0020 | 1.0082 | 0.0108 | -0.0039  | 0.0068 |
| Pack years adult smoking as proportion of life span exposed to smoking<br>PREVIEW ONLY                                                       | European  | 0.0175  | 0.0930 | 0.1878  | 8.51E-01 | 0.1264 | 0.0136 | 1.0206 | 0.0143 | 0.0017   | 0.0079 |
| Why reduced smoking: Illness or ill health                                                                                                   | European  | -0.0497 | 0.2665 | -0.1866 | 8.52E-01 | 0.0836 | 0.0559 | 1.0047 | 0.0103 | 0.0114   | 0.0065 |
| Reason for glasses/contact lenses: For short-sightedness i.e. only or mainly for distance viewing such as driving cinema etc (called myopia) | European  | -0.0214 | 0.1152 | -0.1857 | 8.53E-01 | 0.0230 | 0.0024 | 1.1376 | 0.0130 | -0.0019  | 0.0074 |
| Diagnoses - main ICD10: I10 Essential (primary) hypertension                                                                                 | European  | -0.0636 | 0.3460 | -0.1840 | 8.54E-01 | 0.0022 | 0.0016 | 1.0036 | 0.0093 | 0.0004   | 0.0075 |
| Non-cancer illness code self-reported: ankylosing spondylitis                                                                                | European  | 0.0751  | 0.4094 | 0.1834  | 8.55E-01 | 0.0014 | 0.0018 | 1.0103 | 0.0101 | 0.0057   | 0.0072 |
| Medication for cholesterol blood pressure diabetes or take exogenous hormones: Cholesterol lowering medication                               | European  | -0.0175 | 0.0971 | -0.1803 | 8.57E-01 | 0.0489 | 0.0074 | 1.0370 | 0.0245 | 0.0097   | 0.0067 |
| Non-cancer illness code self-reported: diabetes                                                                                              | European  | 0.0159  | 0.0930 | 0.1706  | 8.65E-01 | 0.0345 | 0.0028 | 1.0571 | 0.0157 | 0.0107   | 0.0075 |
| Non-cancer illness code self-reported: back problem                                                                                          | European  | 0.0309  | 0.1910 | 0.1617  | 8.72E-01 | 0.0057 | 0.0017 | 0.9967 | 0.0096 | -0.0035  | 0.0068 |
| Diagnoses - main ICD10: R55 Syncope and collapse                                                                                             | European  | 0.0327  | 0.2096 | 0.1558  | 8.76E-01 | 0.0048 | 0.0015 | 1.0176 | 0.0095 | 0.0006   | 0.0071 |
| Reason for glasses/contact lenses: For astigmatism                                                                                           | European  | 0.0282  | 0.1828 | 0.1545  | 8.77E-01 | 0.0078 | 0.0019 | 1.0359 | 0.0111 | 0.0058   | 0.0070 |
| Diagnoses - main ICD10: K62 Other diseases of anus and rectum                                                                                | European  | -0.0288 | 0.1913 | -0.1507 | 8.80E-01 | 0.0059 | 0.0018 | 0.9989 | 0.0105 | -0.0016  | 0.0069 |
| Non-cancer illness code self-reported: chronic obstructive airways disease/copd                                                              | European  | 0.0290  | 0.1954 | 0.1486  | 8.82E-01 | 0.0055 | 0.0017 | 0.9915 | 0.0088 | -0.0043  | 0.0068 |

| Trait                                                                 | ethnicity | rg      | SE     | z       | p        | h2_obs | se     | h2_int | se     | gcov_int | se     |
|-----------------------------------------------------------------------|-----------|---------|--------|---------|----------|--------|--------|--------|--------|----------|--------|
| Cancer code self-reported: prostate cancer                            | European  | 0.0273  | 0.1847 | 0.1480  | 8.82E-01 | 0.0058 | 0.0019 | 1.0196 | 0.0124 | -0.0024  | 0.0069 |
| Non-cancer illness code self-reported: gout                           | European  | 0.0173  | 0.1167 | 0.1478  | 8.83E-01 | 0.0251 | 0.0092 | 1.0004 | 0.0435 | -0.0028  | 0.0079 |
| Current employment status: In paid employment or self-employed        | European  | -0.0277 | 0.1892 | -0.1466 | 8.84E-01 | 0.0064 | 0.0017 | 1.0281 | 0.0101 | -0.0051  | 0.0073 |
| Non-cancer illness code self-reported: sleep apnoea                   | European  | 0.0367  | 0.2552 | 0.1437  | 8.86E-01 | 0.0031 | 0.0018 | 1.0092 | 0.0110 | -0.0022  | 0.0071 |
| Cancer code self-reported: breast cancer                              | European  | -0.0250 | 0.1750 | -0.1427 | 8.87E-01 | 0.0077 | 0.0023 | 1.0419 | 0.0141 | -0.0007  | 0.0068 |
| Non-cancer illness code self-reported: emphysema/chronic bronchitis   | European  | 0.0213  | 0.1586 | 0.1343  | 8.93E-01 | 0.0102 | 0.0019 | 0.9818 | 0.0110 | 0.0015   | 0.0071 |
| Neck/shoulder pain for 3+ months                                      | European  | -0.0327 | 0.2465 | -0.1324 | 8.95E-01 | 0.0154 | 0.0065 | 1.0156 | 0.0096 | 0.0027   | 0.0068 |
| Vitamin and mineral supplements: Multivitamins +/- minerals           | European  | 0.0137  | 0.1050 | 0.1300  | 8.97E-01 | 0.0233 | 0.0020 | 1.0115 | 0.0108 | -0.0019  | 0.0078 |
| Diagnoses - main ICD10: G56 Mononeuropathies of upper limb            | European  | 0.0177  | 0.1408 | 0.1257  | 9.00E-01 | 0.0128 | 0.0022 | 1.0141 | 0.0119 | -0.0092  | 0.0076 |
| Exposure to tobacco smoke outside home                                | European  | 0.0128  | 0.1025 | 0.1245  | 9.01E-01 | 0.0338 | 0.0031 | 1.0071 | 0.0135 | -0.0051  | 0.0076 |
| Non-cancer illness code self-reported: hyperthyroidism/thyrotoxicosis | European  | 0.0216  | 0.1747 | 0.1237  | 9.02E-01 | 0.0091 | 0.0033 | 1.0077 | 0.0120 | -0.0058  | 0.0072 |
| Pulse wave reflection index                                           | European  | 0.0149  | 0.1230 | 0.1214  | 9.03E-01 | 0.0535 | 0.0068 | 1.0082 | 0.0116 | -0.0030  | 0.0075 |
| Non-cancer illness code self-reported: bladder problem (not cancer)   | European  | 0.0315  | 0.2677 | 0.1177  | 9.06E-01 | 0.0024 | 0.0014 | 1.0000 | 0.0091 | 0.0024   | 0.0066 |
| Hearing aid user                                                      | European  | 0.0193  | 0.1672 | 0.1157  | 9.08E-01 | 0.0151 | 0.0032 | 1.0128 | 0.0107 | 0.0002   | 0.0075 |
| Diagnoses - main ICD10: I25 Chronic ischaemic heart disease           | European  | 0.0125  | 0.1103 | 0.1136  | 9.10E-01 | 0.0213 | 0.0028 | 1.0189 | 0.0119 | 0.0063   | 0.0070 |
| Non-cancer illness code self-reported: osteoarthritis                 | European  | 0.0141  | 0.1245 | 0.1133  | 9.10E-01 | 0.0188 | 0.0023 | 1.0255 | 0.0126 | -0.0099  | 0.0073 |
| Impedance of leg (left)                                               | European  | 0.0070  | 0.0626 | 0.1117  | 9.11E-01 | 0.2414 | 0.0114 | 1.1163 | 0.0371 | 0.0113   | 0.0113 |
| Illnesses of mother: Chronic bronchitis/emphysema                     | European  | -0.0163 | 0.1531 | -0.1062 | 9.15E-01 | 0.0106 | 0.0021 | 1.0149 | 0.0107 | 0.0005   | 0.0065 |
| Illnesses of siblings: Stroke                                         | European  | -0.0282 | 0.2683 | -0.1049 | 9.16E-01 | 0.0040 | 0.0023 | 1.0100 | 0.0097 | 0.0000   | 0.0067 |
| Vitamin and mineral supplements: None of the above                    | European  | 0.0083  | 0.0929 | 0.0891  | 9.29E-01 | 0.0290 | 0.0022 | 1.0033 | 0.0112 | 0.0021   | 0.0076 |
| Wheeze or whistling in the chest in last year                         | European  | -0.0072 | 0.0824 | -0.0872 | 9.31E-01 | 0.0578 | 0.0042 | 1.0520 | 0.0177 | -0.0049  | 0.0079 |
| Handedness (chirality/laterality): Left-handed                        | European  | -0.0128 | 0.1477 | -0.0866 | 9.31E-01 | 0.0102 | 0.0021 | 1.0018 | 0.0111 | 0.0043   | 0.0071 |
| Diagnoses - main ICD10: M20 Acquired deformities of fingers and toes  | European  | 0.0104  | 0.1307 | 0.0792  | 9.37E-01 | 0.0108 | 0.0019 | 0.9857 | 0.0110 | 0.0079   | 0.0066 |
| Diagnoses - main ICD10: D25 Leiomyoma of uterus                       | European  | 0.0162  | 0.2087 | 0.0775  | 9.38E-01 | 0.0047 | 0.0018 | 1.0041 | 0.0103 | 0.0033   | 0.0066 |
| Diagnoses - main ICD10: E04 Other non-toxic goitre                    | European  | 0.0139  | 0.1797 | 0.0773  | 9.38E-01 | 0.0055 | 0.0016 | 0.9899 | 0.0097 | 0.0008   | 0.0066 |
| Non-cancer illness code self-reported: crohn's disease                | European  | 0.0185  | 0.2532 | 0.0730  | 9.42E-01 | 0.0035 | 0.0019 | 1.0155 | 0.0113 | -0.0077  | 0.0073 |
| Ever taken oral contraceptive pill                                    | European  | 0.0106  | 0.1513 | 0.0701  | 9.44E-01 | 0.0175 | 0.0033 | 1.0203 | 0.0102 | 0.0035   | 0.0075 |
| Current employment status: Looking after home and/or family           | European  | 0.0121  | 0.1847 | 0.0656  | 9.48E-01 | 0.0064 | 0.0015 | 0.9965 | 0.0087 | 0.0059   | 0.0069 |
| Non-cancer illness code self-reported: high cholesterol               | European  | 0.0061  | 0.0985 | 0.0617  | 9.51E-01 | 0.0393 | 0.0075 | 1.0817 | 0.0491 | 0.0091   | 0.0086 |
| Ever had prostate specific antigen (PSA) test                         | European  | -0.0075 | 0.1325 | -0.0570 | 9.55E-01 | 0.0346 | 0.0042 | 1.0006 | 0.0112 | 0.0013   | 0.0069 |
| Diagnoses - main ICD10: S09 Other and unspecified injuries of head    | European  | 0.0117  | 0.2122 | 0.0550  | 9.56E-01 | 0.0045 | 0.0019 | 0.9919 | 0.0107 | -0.0032  | 0.0065 |
| Breastfed as a baby                                                   | European  | 0.0060  | 0.1101 | 0.0544  | 9.57E-01 | 0.0234 | 0.0030 | 1.0334 | 0.0118 | -0.0013  | 0.0073 |
| Diabetes diagnosed by doctor                                          | European  | -0.0047 | 0.0871 | -0.0534 | 9.57E-01 | 0.0410 | 0.0031 | 1.0689 | 0.0168 | 0.0108   | 0.0077 |

| Trait                                                                    | ethnicity | rg      | SE     | z       | p        | h2_obs | se     | h2_int | se     | gcov_int | se     |
|--------------------------------------------------------------------------|-----------|---------|--------|---------|----------|--------|--------|--------|--------|----------|--------|
| Tinnitus: Yes but not now but have in the past                           | European  | 0.0094  | 0.2174 | 0.0432  | 9.66E-01 | 0.0150 | 0.0053 | 0.9976 | 0.0098 | 0.0052   | 0.0078 |
| Pack years of smoking PREVIEW ONLY                                       | European  | 0.0040  | 0.0976 | 0.0406  | 9.68E-01 | 0.1098 | 0.0122 | 1.0195 | 0.0139 | 0.0024   | 0.0077 |
| Non-cancer illness code self-reported: eczema/dermatitis                 | European  | -0.0061 | 0.1651 | -0.0368 | 9.71E-01 | 0.0080 | 0.0026 | 1.0211 | 0.0107 | 0.0093   | 0.0068 |
| Number of cigarettes previously smoked daily                             | European  | -0.0030 | 0.1076 | -0.0281 | 9.78E-01 | 0.0940 | 0.0166 | 1.0138 | 0.0132 | -0.0033  | 0.0072 |
| Mothers age at death                                                     | European  | -0.0033 | 0.1301 | -0.0257 | 9.80E-01 | 0.0255 | 0.0035 | 1.0248 | 0.0112 | -0.0007  | 0.0074 |
| Fractured bone site(s): Arm                                              | European  | -0.0055 | 0.2317 | -0.0238 | 9.81E-01 | 0.0050 | 0.0016 | 0.9997 | 0.0092 | -0.0020  | 0.0077 |
| Diagnoses - main ICD10: F31 Bipolar affective disorder                   | European  | -0.0050 | 0.2237 | -0.0223 | 9.82E-01 | 0.0049 | 0.0016 | 0.9906 | 0.0089 | 0.0018   | 0.0069 |
| Diagnoses - main ICD10: M17 Gonarthrosis [arthrosis of knee]             | European  | -0.0024 | 0.1395 | -0.0175 | 9.86E-01 | 0.0140 | 0.0021 | 1.0042 | 0.0114 | -0.0069  | 0.0083 |
| Diagnoses - main ICD10: N81 Female genital prolapse                      | European  | -0.0038 | 0.2213 | -0.0174 | 9.86E-01 | 0.0053 | 0.0019 | 1.0360 | 0.0097 | 0.0056   | 0.0072 |
| Medication for cholesterol blood pressure or diabetes: Insulin           | European  | -0.0028 | 0.2437 | -0.0114 | 9.91E-01 | 0.0087 | 0.0039 | 1.0171 | 0.0110 | 0.0119   | 0.0068 |
| Medication for cholesterol blood pressure or diabetes: None of the above | European  | 0.0011  | 0.1017 | 0.0104  | 9.92E-01 | 0.0849 | 0.0064 | 1.0550 | 0.0168 | -0.0080  | 0.0088 |
| Non-cancer illness code self-reported: polio / poliomyelitis             | European  | -0.0016 | 0.2508 | -0.0066 | 9.95E-01 | 0.0028 | 0.0016 | 0.9903 | 0.0088 | 0.0055   | 0.0064 |

**eTable 12.** SNP Heritability estimates across varying analytical designs

All heritabilities are calculated using LDscore regression.  $h^2_{liab}$ = Heritability at the liability scale. SE= standard error for SNP heritability.  $k$ = prevalence used in the analysis.

| <b>Design</b> | <b><math>h^2_{liab}</math></b> | <b>SE</b> | <b><math>k</math></b> |
|---------------|--------------------------------|-----------|-----------------------|
| "Naïve"       | 0.2816                         | 0.0267    | 0.2                   |
| Prevalence    | 0.2617                         | 0.0278    | 0.2                   |
| Covariates    | 0.0813                         | 0.0184    | 0.2                   |
| Covariates    | 0.0908                         | 0.0205    | 0.3                   |
| Covariates    | 0.0960                         | 0.0217    | 0.4                   |
| Covariates    | 0.0977                         | 0.0221    | 0.5                   |
| Propensity    | 0.1316                         | 0.0341    | 0.2                   |
| Propensity    | 0.1470                         | 0.0381    | 0.3                   |
| Propensity    | 0.1555                         | 0.0403    | 0.4                   |
| Propensity    | 0.1583                         | 0.0410    | 0.5                   |
